# Supplementary material for: Genetic diversity and evolution of rice centromeres
Source: bioRxiv preprint, doi:10.1101/2024.07.28.605524, version 2 (2024-09-03)
Supplement: Supplementary Tables [file 605524_file16.xlsx]

## Sheet: S1
Supplementary Table 1 The source, sequencing, assembly and QC information of 70 rice genomes in this study
ID	Name	Other alias	Species	Taxa1	Taxa2	Eco-type	HiFi Base(Gb)	HiFi Fold	Hifiasm N50(Mb)	Hifiasm Size(Mb)	Verkko N50(Mb)	Verkko Size(Mb)	Final N50(Mb)	Final Size(Mb)	QV	Error	Completeness	GCI	Gaps	Complete Chrs	CCS mapping rate	ONT mapping rate	NGS mapping rate	R-AQI	S-AQI	HiFi data	ONT data	NGS data	RNA-seq data	CENH3 ChIP data
NIP	NIP		Oryza sativa	GJ	GJ-tmp	Cultivated	NA	NA	NA	NA	NA	NA	31.2101	381.702	41.558	6.98556e-05	97.8483	NA	0	12	N/A	N/A	0.9707	NA	NA	Shang et al., 2023	Shang et al., 2023	Shang et al., 2023	Shang et al., 2023	Shang et al., 2023; Zhang et al., 2013 (PRJNA218812)
13-65	13-65		Oryza sativa	GJ	GJ-tmp	Weedy	8.2	20.5	15	390.9	10.1377	393.007	16.7876	376.51	63.4198	4.55012e-07	76.4668	52.7311	20	3	0.9998	NA	0.9859	98.7857	96.7346	Wu et al., 2023, Genome Biol.	NA	Wu et al., 2023, Genome Biol.
18WR-118	18WR-118		Oryza sativa	GJ	GJ-tmp	Weedy	12.3	30.75	15.4	388.7	0.727365	437.355	15.421	374.549	59.4998	1.12207e-06	99.2453	32.3768	42	1	1	NA	0.9871	98.2271	97.2356	Wu et al., 2023, Genome Biol.	NA	Wu et al., 2023, Genome Biol.
YCW03	YCW03		Oryza sativa	GJ	GJ-tmp	Weedy	10.3	25.75	23.7	394.8	18.3828	399.201	28.5688	379.436	57.0689	1.96388e-06	99.0228	56.7852	18	5	0.9999	NA	NA	NA	NA	Wu et al., 2023, Genome Biol.	NA	NA
PI653439	PI653439		Oryza sativa	AUS	AUS	Weedy	15.1	37.75	29.8	414.1	24.55	406.05	30.4223	387.064	69.8401	1.0375e-07	75.2783	87.513	4	9	0.999	NA	0.9914	99.2023	99.742	Wu et al., 2023, Genome Biol.	NA	Wu et al., 2023, Genome Biol.
18XHB-49	18XHB-49		Oryza sativa	AUS	AUS	Weedy	12	30	17.5	399.6	0.347194	543.048	17.4786	384.23	64.9636	3.18889e-07	99.2886	37.5022	26	3	1	NA	0.9872	98.72	97.431	Wu et al., 2023, Genome Biol.	NA	Wu et al., 2023, Genome Biol.
18XHB-83	18XHB-83		Oryza sativa	XI	XI-2	Weedy	11.9	29.75	18.1	423.1	10.4944	420.191	25.6347	396.276	64.6682	3.41333e-07	99.2733	53.3031	28	1	0.9994	NA	0.9861	98.6258	97.0173	Wu et al., 2023, Genome Biol.	NA	Wu et al., 2023, Genome Biol.
CX20	CX20		Oryza sativa	XI	XI-1A	Weedy	11.6	29	20.7	434.7	11.6865	414.022	30.4322	397.216	64.1914	3.80943e-07	99.2266	60.2182	24	5	0.9999	NA	0.9825	98.7823	99.4978	Wu et al., 2023, Genome Biol.	NA	Wu et al., 2023, Genome Biol.
CX3	CX3		Oryza sativa	XI	XI-1A	Weedy	14.5	36.25	30	444.9	18.6788	453.714	31.0261	397.764	65.9644	2.53259e-07	84.3977	54.5514	14	6	0.9995	NA	0.9606	98.9621	98.7508	Wu et al., 2023, Genome Biol.	NA	Wu et al., 2023, Genome Biol.
NJ11	NJ11	NH051/SL041	Oryza sativa	XI	XI-1A	Cultivated	10.1	25.25	26.2	428.9	12.6767	413.435	30.8295	395.824	61.8174	6.58059e-07	98.9733	65.9236	10	5	0.999	0.9811	0.9799	99.0446	97.5053	Wu et al., 2023, Genome Biol.	Shang et al., 2022, Cell Res.	Wu et al., 2023, Genome Biol.	Shang et al., 2022, Cell Res.	This study
18XHB-57	18XHB-57		Oryza sativa	XI	XI-1B	Weedy	10.7	26.75	15.9	417.5	3.76424	470.129	27.6906	397.876	61.8022	6.60354e-07	97.1244	35.0275	27	3	1	NA	0.9794	98.7016	97.2732	Wu et al., 2023, Genome Biol.	NA	Wu et al., 2023, Genome Biol.
PI653432	PI653432		Oryza sativa	XI	XI-3	Weedy	14.2	35.5	26	426.4	14.146	419.079	30.6994	401.021	67.1727	1.91748e-07	76.265	67.2803	16	6	0.9983	NA	0.9933	98.9458	99.2547	Wu et al., 2023, Genome Biol.	NA	Wu et al., 2023, Genome Biol.
YZ-2	YZ-2		Oryza sativa	XI	XI-3	Weedy	17.1	42.75	27.9	435.7	16.3622	417.21	28.6065	400.164	71.9346	6.40528e-08	99.5492	65.0105	14	6	0.9999	NA	0.9735	99.0178	100	Wu et al., 2023, Genome Biol.	NA	Wu et al., 2023, Genome Biol.
ZS97	ZS97		Oryza sativa	XI	XI-1A	Cultivated	NA	NA	NA	NA	NA	NA	32.1199	391.562	60.5286	8.85396e-07	99.2918	54.1221	0	12	0.9992	NA	0.9899	99.1988	95.7513	Song et al., 2021, Mol. Plant	NA	Song et al., 2021, Mol. Plant	Song et al., 2021, Mol. Plant	Song et al., 2021, Mol. Plant
MH63	MH63		Oryza sativa	XI	XI-1B	Cultivated	NA	NA	NA	NA	NA	NA	31.9212	395.765	58.8955	1.28959e-06	99.5275	49.894	0	12	0.9998	NA	0.985	99.2699	97.7516	Song et al., 2021, Mol. Plant	NA	Song et al., 2021, Mol. Plant	Song et al., 2021, Mol. Plant	Song et al., 2021, Mol. Plant
Pulut-Hitam-2	Pulut Hitam-2		Oryza sativa	GJ	GJ-trp	Cultivated	23.3	58.25	28.9	410.439	20.2449	406.541	24.7981	382.878	61.9398	6.39766e-07	99.3259	45.5511	14	6	0.9998	NA	NA	NA	NA	Sedeek et al., 2023, Nat. Food	NA	NA
Zag	Zag		Oryza sativa	GJ	GJ-tmp	Cultivated	23.1	57.75	28.8	396.575	20.4848	401.116	28.7529	376.883	62.4615	5.67346e-07	99.4448	55.3346	11	6	0.9997	NA	NA	NA	NA	Sedeek et al., 2023, Nat. Food	NA	NA
Cempo-Ireng	Cempo Ireng		Oryza sativa	XI	XI-1B	Cultivated	16.2	40.5	25.5	405.89	17.4938	402.894	26.7833	396.445	59.3778	1.15403e-06	99.2713	52.781	26	4	0.9992	NA	NA	NA	NA	Sedeek et al., 2023, Nat. Food	NA	NA
Balatinaw	Balatinaw		Oryza sativa	XI	XI-3	Cultivated	21.1	52.75	24.7	424.117	15.4422	427.131	27.4715	401.244	61.2637	7.47527e-07	99.0742	69.8853	14	5	0.9997	NA	NA	NA	NA	Sedeek et al., 2023, Nat. Food	NA	NA
Cempo-Abang	Cempo Abang		Oryza sativa	XI	XI-1B	Cultivated	20.4	51	25.8	411.517	20.5403	408.35	27.8566	398.148	61.4829	7.10743e-07	99.2041	63.8519	18	5	0.9988	NA	NA	NA	NA	Sedeek et al., 2023, Nat. Food	NA	NA
XL628S	Xiangling628S		Oryza sativa	XI	XI-1A	Cultivated	34.91	87.275	30.5	422.322	4.20368	467.134	31.1669	397.855	60.0388	9.91115e-07	99.323	64.3741	22	7	0.9993	NA	0.9943	98.5899	99.4986	Zhang et al., 2022, Plant Biotech.	NA	Zhang et al., 2022, Plant Biotech.	Zhang et al., 2022, Plant Biotech.
LK638S	Longke638S		Oryza sativa	XI	XI-1A	Cultivated	29.38	73.45	32.5	406.509	17.8	417.3	32.4919	396.192	72.1865	6.04439e-08	99.1695	76.6051	0	12	0.9991	1	0.9799	99.3459	98.9955	Zhang et al., 2022, Plant Biotech.	Zhang et al., 2022, Plant Biotech.	Zhang et al., 2022, Plant Biotech.	Zhang et al., 2022, Plant Biotech.
J4155S	Jing4155S		Oryza sativa	XI	XI-1A	Cultivated	47.88	119.7	31.7	415.069	3	494.2	31.703	396.358	57.6942	1.70051e-06	98.9348	84.8631	2	10	0.9989	1	0.9755	99.3211	99.4967	Zhang et al., 2022, Plant Biotech.	Zhang et al., 2022, Plant Biotech.	Zhang et al., 2022, Plant Biotech.	Zhang et al., 2022, Plant Biotech.
HuaZhan	Huazhan		Oryza sativa	XI	XI-1B	Cultivated	40.58	101.45	32	426.537	19.6	449.1	31.9771	394.922	71.156	7.66309e-08	99.3538	80.5843	1	11	0.9979	0.9999	0.9857	99.3438	100	Zhang et al., 2022, Plant Biotech.	Zhang et al., 2022, Plant Biotech.	Zhang et al., 2022, Plant Biotech.	Zhang et al., 2022, Plant Biotech.
9311	9311	NH231	Oryza sativa	XI	XI-1B	Cultivated	9.51	23.775	31.6	401	30.1	414.4	31.6	398.6	62.6392	5.44605e-07	99.5616	85.4755	3	10	NA	NA	0.9925	99.3248	100	this study	Lang et al., 2020, GigaScience	Shang et al., 2022, Cell Res.	Shang et al., 2022, Cell Res.
SL001	Heibiao	NH001	Oryza sativa	GJ	GJ-trp	Cultivated	11.33	28.325	30	381.165	25.126	390.623	30.6018	378.471	68.6027	1.37951e-07	99.7376	94.157	1	11	0.9998	0.9811	0.9898	99.3547	98.2972	this study	Shang et al., 2022, Cell Res.	Shang et al., 2022, Cell Res.	Shang et al., 2022, Cell Res.
SL019	Djanda Mandja	NH022	Oryza sativa	GJ	GJ-trp	Cultivated	10.93	27.325	30.8	385.538	25.0983	398.397	30.7793	381.639	68.1313	1.53768e-07	99.6889	83.7726	2	10	0.9993	0.9848	0.9916	99.178	98.8278	this study	Shang et al., 2022, Cell Res.	Shang et al., 2022, Cell Res.	Shang et al., 2022, Cell Res.
SL039	80050YR72136-43	NH047	Oryza sativa	GJ	GJ-trp	Cultivated	15.36	38.4	31.4	388.173	27.9036	401.084	31.4273	383.324	69.7414	1.06135e-07	99.3699	80.9766	1	11	0.9994	0.9759	0.9904	99.324	98.4897	this study	Shang et al., 2022, Cell Res.	Shang et al., 2022, Cell Res.	Shang et al., 2022, Cell Res.
SL177	lemont	NH212	Oryza sativa	GJ	GJ-trp	Cultivated	11.62	29.05	24.3	388.962	24.2336	400.834	29.6623	384.634	65.2554	2.98165e-07	99.6278	72.4917	4	8	0.9983	0.9877	0.9892	99.2489	98.069	this study	Shang et al., 2022, Cell Res.	Shang et al., 2022, Cell Res.	Shang et al., 2022, Cell Res.	This study
SL028	Nabated A Smar	NH034	Oryza sativa	GJ	GJ-tmp	Cultivated	12.05	30.125	29.8	384.597	29.7118	394.257	30.5349	381.247	69.9664	1.00777e-07	99.6916	99.9999	1	11	0.9994	0.9831	0.9931	99.3203	97.667	this study	Shang et al., 2022, Cell Res.	Shang et al., 2022, Cell Res.	Shang et al., 2022, Cell Res.
SL032	Gongchengxiang	NH039	Oryza sativa	GJ	GJ-tmp	Cultivated	10.6	26.5	29.4	382.693	29.4399	393.627	29.8598	380.446	66.4606	2.25913e-07	99.7222	81.6909	3	10	0.9989	0.9761	0.9932	99.2667	98.6944	this study	Shang et al., 2022, Cell Res.	Shang et al., 2022, Cell Res.	Shang et al., 2022, Cell Res.
SL126	Linguo	NH149	Oryza sativa	GJ	GJ-tmp	Cultivated	14.38	35.95	29.9	382.588	29.9727	390.401	30.3765	379.289	68.6605	1.36127e-07	99.1941	75.647	3	9	0.9996	0.985	0.9914	99.2645	98.7338	this study	Shang et al., 2022, Cell Res.	Shang et al., 2022, Cell Res.	Shang et al., 2022, Cell Res.
SL129	Keluoduo B	NH152	Oryza sativa	GJ	GJ-tmp	Cultivated	12.69	31.725	29.1	382.994	21.0616	394.548	30.9334	379.038	69.2598	1.18583e-07	99.2641	89.6477	2	10	0.9995	0.9874	0.9921	99.3164	98.1702	this study	Shang et al., 2022, Cell Res.	Shang et al., 2022, Cell Res.	Shang et al., 2022, Cell Res.
SL167	Jindao 1	NH201	Oryza sativa	GJ	GJ-tmp	Cultivated	11.64	29.1	29.8	381.448	28.5778	393.251	30.2048	377.349	67.2484	1.88434e-07	97.5498	85.4737	0	12	1	0.9878	0.9532	99.2607	96.4857	this study	Shang et al., 2022, Cell Res.	Shang et al., 2022, Cell Res.	Shang et al., 2022, Cell Res.
SL170	Zhengdao 5	NH204	Oryza sativa	GJ	GJ-tmp	Cultivated	11.67	29.175	28.5	382.155	25.7961	390.173	30.9164	378.772	70.0648	9.85179e-08	99.6645	78.1635	1	11	0.9992	0.9844	0.9923	99.2897	97.4373	this study	Shang et al., 2022, Cell Res.	Shang et al., 2022, Cell Res.	Shang et al., 2022, Cell Res.	This study
SL187	Haomake (K)	NH223	Oryza sativa	GJ	GJ-tmp	Cultivated	12.41	31.025	30.3	387.6	25.6	405.9	30.3	383	67.2487	1.88422e-07	98.9025	87.2196	2	10	0.9989	0.9888	0.988	99.2974	98.0606	this study	Shang et al., 2022, Cell Res.	Shang et al., 2022, Cell Res.	Shang et al., 2022, Cell Res.
SL202	LanSheng	NH240	Oryza sativa	GJ	GJ-tmp	Cultivated	12.6	31.5	30	381.6	23.2	385.7	30	378.5	69.2839	1.17925e-07	99.6595	78.3714	1	11	1	0.9863	0.9702	99.3154	97.7792	this study	Shang et al., 2022, Cell Res.	Shang et al., 2022, Cell Res.	Shang et al., 2022, Cell Res.
SL127	Tjantajan	NH150	Oryza sativa	XI	XI-3	Cultivated	11.39	28.475	32.5	398.305	29.2498	405.027	32.4698	395.274	65.5096	2.81218e-07	94.9958	83.8728	1	11	0.9984	0.9879	0.975	99.3444	98.7847	this study	Shang et al., 2022, Cell Res.	Shang et al., 2022, Cell Res.	Shang et al., 2022, Cell Res.
SL133	CHANH 148	NH157	Oryza sativa	XI	XI-3	Cultivated	10	25	30.6	400.68	12.1772	412.564	31.2552	396.28	65.2035	3.01755e-07	99.6095	68.8808	6	8	0.9979	0.9841	0.9926	99.1832	97.6312	this study	Shang et al., 2022, Cell Res.	Shang et al., 2022, Cell Res.	Shang et al., 2022, Cell Res.
SL174	Laozaogu	NH208	Oryza sativa	XI	XI-3	Cultivated	11	27.5	32	406.616	24.4646	419.093	32.5152	407.067	66.0557	2.47988e-07	99.4256	84.7296	1	11	0.9996	0.9891	0.9868	99.3633	98.0539	this study	Shang et al., 2022, Cell Res.	Shang et al., 2022, Cell Res.	Shang et al., 2022, Cell Res.
SL148	Lucaihao	NH178	Oryza sativa	XI	XI-1A	Cultivated	11.42	28.55	31.3	399.996	26.1905	410.095	31.298	396.82	65.4774	2.83306e-07	99.0663	70.6006	3	10	1	0.9861	0.9878	99.2593	99.7483	this study	Shang et al., 2022, Cell Res.	Shang et al., 2022, Cell Res.	Shang et al., 2022, Cell Res.
SL173	Xiangdao	NH207	Oryza sativa	XI	XI-1A	Cultivated	12.28	30.7	32.3	398.807	29.0505	412.78	32.2746	394.819	65.8113	2.62346e-07	99.4438	80.2455	1	11	0.9999	0.9875	0.9901	99.3185	98.7416	this study	Shang et al., 2022, Cell Res.	Shang et al., 2022, Cell Res.	Shang et al., 2022, Cell Res.
SL044	Nantehao	NH054	Oryza sativa	XI	XI-1A	Cultivated	14.6	36.5	30.3	397.543	30.3705	405.434	31.2882	393.966	69.0526	1.24377e-07	99.7085	84.7348	2	10	0.999	0.9794	0.9915	99.2666	99.4936	this study	Shang et al., 2022, Cell Res.	Shang et al., 2022, Cell Res.	Shang et al., 2022, Cell Res.
SL102	IR 661-1	NH122	Oryza sativa	XI	XI-1B	Cultivated	13.49	33.725	31.7	390.67	28.407	401.862	31.7319	387.701	64.6105	3.459e-07	87.1759	78.1745	2	10	0.9999	0.9885	0.9526	98.9991	96.9939	this study	Shang et al., 2022, Cell Res.	Shang et al., 2022, Cell Res.	Shang et al., 2022, Cell Res.
SL010	2037(Rajahamsal)	NH011	Oryza sativa	XI	XI-2	Cultivated	10.87	27.175	30.1	398.713	31.5347	408.037	32.9381	394.761	65.804	2.62785e-07	99.3045	94.4381	3	9	0.9995	0.9888	0.9813	99.3184	98.4916	this study	Shang et al., 2022, Cell Res.	Shang et al., 2022, Cell Res.	Shang et al., 2022, Cell Res.
SL084	Aimakang	NH100	Oryza sativa	XI	XI-1A	Cultivated	13.08	32.7	32.1	399.221	31.3107	410.028	32.1291	395.43	65.9615	2.53423e-07	99.7013	71.808	2	10	0.9998	0.98	0.995	99.3446	99.2442	this study	Shang et al., 2022, Cell Res.	Shang et al., 2022, Cell Res.	Shang et al., 2022, Cell Res.
SL120	Liushizao	NH143	Oryza sativa	XI	XI-1A	Cultivated	13.36	33.4	32.2	402.987	28.3706	417.896	32.1715	399.352	66.82	2.07969e-07	93.9891	85.3458	2	11	0.9999	0.9859	0.9686	99.3262	100	this study	Shang et al., 2022, Cell Res.	Shang et al., 2022, Cell Res.	Shang et al., 2022, Cell Res.
SL022	Dumai	NH026	Oryza sativa	AUS	AUS	Cultivated	11.04	27.6	31.5	392.844	31.4547	400.656	31.6335	389.672	67.9208	1.61405e-07	99.2246	99.9999	0	12	0.9996	0.9895	0.9792	99.386	98.3458	this study	Shang et al., 2022, Cell Res.	Shang et al., 2022, Cell Res.	Shang et al., 2022, Cell Res.
SL121	Qingke	NH144	Oryza sativa	AUS	AUS	Cultivated	11	27.5	31.5	388.086	31.396	392.248	31.5138	385.96	68.3754	1.45366e-07	99.2047	99.9999	0	12	1	0.9853	0.977	99.3801	99.2257	this study	Shang et al., 2022, Cell Res.	Shang et al., 2022, Cell Res.	Shang et al., 2022, Cell Res.	This study
SL190	Kasalath	NH227	Oryza sativa	AUS	AUS	Cultivated	11.34	28.35	30.8	389.2	30.8	396.6	30.8	386.3	65.8288	2.61287e-07	99.691	80.1818	3	9	0.9999	0.992	0.9772	99.3036	99.4837	this study	Shang et al., 2022, Cell Res.	Shang et al., 2022, Cell Res.	Shang et al., 2022, Cell Res.
SL203	N22	NH241	Oryza sativa	AUS	AUS	Cultivated	10.13	25.325	31	391.8	29.6	400.1	30.3	389	67.0523	1.97137e-07	99.7216	78.5663	3	10	1	0.9797	0.9831	99.3083	99.4872	this study	Shang et al., 2022, Cell Res.	Shang et al., 2022, Cell Res.	Shang et al., 2022, Cell Res.
CW03	CW03	CW03	Oryza rufipogon	Oruf	Or-4	Wild	12.54	31.35	30.1	393.278	26.7649	400.485	30.1228	390.622	66.7766	2.10057e-07	99.6142	78.2071	6	8	1	0.9809	0.9904	99.2476	99.7443	this study	Shang et al., 2022, Cell Res.	Shang et al., 2022, Cell Res.	Shang et al., 2022, Cell Res.	This study
CW13	CW13	CW13	Oryza rufipogon	Oruf	Or-3	Wild	12.55	31.375	27.5	417.061	4.1917	822.442	27.4535	414.655	59.7485	1.05961e-06	84.8828	50.5926	12	5	0.9999	0.9881	0.9596	98.9922	96.4472	this study	Shang et al., 2022, Cell Res.	Shang et al., 2022, Cell Res.	Shang et al., 2022, Cell Res.
CW22	CW22	CW22	Oryza rufipogon	Oruf	Or-3	Wild	11.11	27.775	29.9	413.796	4.22544	823.12	21.1747	410.911	59.2729	1.18224e-06	85.7927	37.512	21	2	0.9998	0.9931	0.9571	98.8026	95.8306	this study	Shang et al., 2022, Cell Res.	Shang et al., 2022, Cell Res.	Shang et al., 2022, Cell Res.
CW06	CW06	CW06	Oryza rufipogon	Oruf	Or-12	Wild	13.15	32.875	32.9	426.906	5.77982	806.703	31.665	399.677	62.7829	5.26876e-07	82.0396	50.0668	11	7	0.9999	0.9692	0.9342	98.8309	95.8358	this study	Shang et al., 2022, Cell Res.	Shang et al., 2022, Cell Res.	Shang et al., 2022, Cell Res.	This study
CW14	CW14	CW14	Oryza rufipogon	Oruf	Or-3	Wild	14.21	35.525	31.5	431.021	6.44036	768.756	32.0988	418.344	62.5457	5.56459e-07	74.972	54.8343	18	7	0.9998	0.9945	0.9406	98.5937	96.8245	this study	Shang et al., 2022, Cell Res.	Shang et al., 2022, Cell Res.	Shang et al., 2022, Cell Res.
CW11	CW11	CW11	Oryza rufipogon	Oruf	Or-12	Wild	11.93	29.825	32.7	418.34	3.93568	598.526	30.7598	407.635	62.3245	5.85538e-07	91.237	58.2667	11	9	1	0.9811	0.9709	99.0721	99.5106	this study	Shang et al., 2022, Cell Res.	Shang et al., 2022, Cell Res.	Shang et al., 2022, Cell Res.	This study
CW01	CW01	CW01	Oryza rufipogon	Oruf	Or-3	Wild	14.11	35.275	31.8	414.405	9.74977	826.115	31.841	409.071	64.084	3.90485e-07	87.7762	83.7086	3	10	0.9993	0.9913	0.9339	NA	NA	this study	Shang et al., 2022, Cell Res.	Shang et al., 2022, Cell Res.	Shang et al., 2022, Cell Res.
CW07	CW07	CW07	Oryza rufipogon	Oruf	Or-12	Wild	10.05	25.125	27.2	416.8	NA	NA	27.1	410.9	56.6615	2.157e-06	94.3182	47.6082	25	3	0.996	0.99	0.9224	98.435	96.8747	this study	Shang et al., 2022, Cell Res.	Shang et al., 2022, Cell Res.	Shang et al., 2022, Cell Res.
CW09	CW09	CW09	Oryza rufipogon	Oruf	Or-12	Wild	12.12	30.3	30.8	415.4	NA	NA	30.8	410.5	62.0547	6.23065e-07	90.8331	57.7844	12	8	0.9914	0.9831	0.9781	99.1026	99.0302	this study	Shang et al., 2022, Cell Res.	Shang et al., 2022, Cell Res.	Shang et al., 2022, Cell Res.
CW15	CW15	CW15	Oryza rufipogon	Oruf	Or-3	Wild	13.12	32.8	32.6	421.587	6.05828	713.641	32.5457	414.429	61.5426	7.01032e-07	81.3088	64.4104	14	8	1	0.9951	0.9482	98.7551	97.3807	this study	Shang et al., 2022, Cell Res.	Shang et al., 2022, Cell Res.	Shang et al., 2022, Cell Res.	This study
CW18	CW18	CW18	Oryza rufipogon	Oruf	Or-3	Wild	11.1	27.75	5.6	529.595	0.194061	750.889	6.51099	454.856	45.5926	2.75891e-05	96.9595	5.4866	321	0	0.9999	0.9957	0.9395	94.8258	94.1335	this study	Shang et al., 2022, Cell Res.	Shang et al., 2022, Cell Res.	Shang et al., 2022, Cell Res.
NH265	NH265	YN136	Oryza glaberrima	Ogla	Ogla	Cultivated	10.57	26.425	25.8	354.039	25.8431	360.821	25.8453	351.305	64.0382	3.9462e-07	99.6114	71.9336	7	7	0.9968	0.9869	0.9981	99.0791	99.1497	this study	Shang et al., 2022, Cell Res.	Shang et al., 2022, Cell Res.	Shang et al., 2022, Cell Res.	This study
NH267	NH267	YN138	Oryza glaberrima	Ogla	Ogla	Cultivated	10.71	26.775	29.7	376.15	6.8514	760.088	29.6709	371.863	56.9751	2.00672e-06	75.7879	70.7452	5	8	0.9998	0.9911	0.9373	98.9833	94.5093	this study	Shang et al., 2022, Cell Res.	Shang et al., 2022, Cell Res.	Shang et al., 2022, Cell Res.
NH271	NH271	YN141	Oryza glaberrima	Ogla	Ogla	Cultivated	12.72	31.8	26.9	354.498	26.9467	363.76	26.9495	350.273	65.6333	2.73322e-07	99.6556	84.3458	2	11	0.9997	0.9896	0.9934	99.2605	99.4306	this study	Shang et al., 2022, Cell Res.	Shang et al., 2022, Cell Res.	Shang et al., 2022, Cell Res.
NH273	NH273	YN143	Oryza glaberrima	Ogla	Ogla	Cultivated	12.94	32.35	27.8	372.948	12.2585	763.915	27.783	367.606	59.9416	1.01354e-06	75.5075	82.4823	5	10	0.9976	0.9888	0.9534	98.7162	94.0629	this study	Shang et al., 2022, Cell Res.	Shang et al., 2022, Cell Res.	Shang et al., 2022, Cell Res.
NH284	NH284	YN151	Oryza barthii	Obar	Obar	Wild	12.68	31.7	27.4	365.261	13.7896	745.201	27.5235	360.448	62.3202	5.86116e-07	76.7573	88.2139	2	11	0.9986	0.9884	0.9564	98.5814	91.8015	this study	Shang et al., 2022, Cell Res.	Shang et al., 2022, Cell Res.	Shang et al., 2022, Cell Res.	This study
NH286	NH286	YN153	Oryza barthii	Obar	Obar	Wild	19.8	49.5	29.8	372.368	25.8726	752.556	29.7889	364.676	62.2502	5.95629e-07	76.9099	99.9999	1	11	0.999	0.9903	0.9413	98.9498	97.8302	this study	Shang et al., 2022, Cell Res.	Shang et al., 2022, Cell Res.	Shang et al., 2022, Cell Res.
NH281	NH281	YN149	Oryza barthii	Obar	Obar	Wild	11.63	29.075	27.5	359.755	26.4253	375.376	27.4518	352.499	62.2331	5.97991e-07	99.4376	77.1941	4	9	0.9997	0.9905	0.9931	99.1807	99.2933	this study	Shang et al., 2022, Cell Res.	Shang et al., 2022, Cell Res.	Shang et al., 2022, Cell Res.
NH285	NH285	YN152	Oryza barthii	Obar	Obar	Wild	10.64	26.6	26.3	356.156	26.3297	367.763	27.1375	350.491	68.243	1.49865e-07	99.6436	84.2391	2	11	0.9991	0.989	0.9957	99.2609	98.5836	this study	Shang et al., 2022, Cell Res.	Shang et al., 2022, Cell Res.	Shang et al., 2022, Cell Res.

## Sheet: S2
Supplementary Table 2 Detailed annotations of centromeres and chromosome arms in the 70 rice genomes
Accession ID	ChrID	Chr length(bp)	CEN start(bp)	CEN end(bp)	L/S ratio										CEN								Chromosome arms
						CEN Total length(bp)	CEN Chr length(bp)	CEN155 counts	CEN155 length(bp)	TE/Non-CEN155 length	Gene length(bp)	LTR+other_repeat length(bp)	Gap length(bp)	Other length(bp)	Non-TE length(bp)	TE total length(bp)	Class1-Copia	Class1-Gypsy	Class1-Other	Class2-MULE	Class2-Harbinger	Class2-CMCEnsp	Non-CEN length(bp)	TE total length(bp)	Class1-Copia	Class1-Gypsy	Class1-Other	Class2-MULE	Class2-Harbinger	Class2-CMCEnsp
13-65	Chr01	43836109	16794358	17543870	1.57	5519489	749512	2763	434915	0.524431	852	164985	0	148761	584584	164985	0(0.0%)	139849(84.765%)	15988(9.691%)	4124(2.5%)	0(0.0%)	3314(2.009%)	43086597	19051752	1198497(6.099%)	5812201(29.58%)	3339982(16.998%)	3378421(17.194%)	1230715(6.263%)	1568826(7.984%)
13-65	Chr02	35931551	13538208	13906330	1.63	5519489	368122	2055	316877	0.521641	0	26732	0	24514	341390	26732	0(0.0%)	13781(51.552%)	12463(46.622%)	0(0.0%)	0(0.0%)	0(0.0%)	35563429	15968167	1084891(6.593%)	4919055(29.894%)	2730475(16.594%)	2715603(16.503%)	947707(5.759%)	1349963(8.204%)
13-65	Chr03	36011340	18693032	19197791	1.11	5519489	504759	3060	472128	0.95391	0	31128	0	1504	473631	31128	0(0.0%)	31128(100.0%)	0(0.0%)	0(0.0%)	0(0.0%)	0(0.0%)	35506581	15014437	1204487(7.757%)	4802719(30.929%)	2351167(15.141%)	2605879(16.781%)	995162(6.409%)	1036150(6.673%)
13-65	Chr04	35122273	9947283	10070464	2.52	5519489	123181	345	53860	0.935475	0	64849	0	4473	58332	64849	0(0.0%)	47624(73.438%)	17193(26.512%)	0(0.0%)	0(0.0%)	32(0.049%)	34999092	19214696	1304768(6.655%)	8548550(43.6%)	2761286(14.083%)	2290447(11.682%)	757424(3.863%)	1849622(9.434%)
13-65	Chr05	30287009	12245616	12357611	1.46	5519489	111995	714	111498	0.937751	0	467	0	31	111528	467	0(0.0%)	467(100.0%)	0(0.0%)	0(0.0%)	0(0.0%)	0(0.0%)	30175014	15224185	1058362(6.571%)	6173373(38.33%)	2026666(12.583%)	2146109(13.325%)	811574(5.039%)	1362593(8.46%)
13-65	Chr06	31258313	15186049	16178570	1.01	5519489	992521	6429	992179	0	0	0	100	243	0	0	0	0	0	0	0	0	30265792	15343818	1107851(6.983%)	5395501(34.007%)	2247107(14.163%)	2363528(14.897%)	830136(5.232%)	1593223(10.042%)
13-65	Chr07	29636353	12019385	12213551	1.45	5519489	194166	1118	180539	0.939536	0	12804	100	724	181362	12804	0(0.0%)	12804(100.0%)	0(0.0%)	0(0.0%)	0(0.0%)	0(0.0%)	29442187	15463266	1132107(7.144%)	6061992(38.254%)	2327933(14.69%)	2173854(13.718%)	713486(4.502%)	1333414(8.414%)
13-65	Chr08	28740351	12795113	12881328	0.75	5519489	86215	97	14649	0.797127	414	57048	0	14105	29247	57048	167(0.292%)	46417(81.285%)	4593(8.043%)	1093(1.914%)	363(0.636%)	3418(5.986%)	28654136	15805546	1055023(6.528%)	6302082(38.997%)	2360229(14.605%)	2067070(12.791%)	746609(4.62%)	1665277(10.305%)
13-65	Chr09	23152162	2440555	2989752	8.26	5519489	549197	2785	447418	0.796178	5701	81035	0	15044	468211	81035	0(0.0%)	61758(71.205%)	18844(21.726%)	2363(2.724%)	180(0.208%)	1243(1.433%)	22602965	11856180	810960(6.644%)	4304721(35.268%)	1935814(15.86%)	1607937(13.174%)	637373(5.222%)	1256760(10.297%)
13-65	Chr10	24732995	8193578	8594605	1.97	5519489	401027	1978	317428	0.913971	997	76408	0	6195	324684	76408	1045(1.368%)	62441(81.721%)	8538(11.174%)	2166(2.835%)	0(0.0%)	1421(1.86%)	24331968	14249338	915022(6.298%)	5918627(40.738%)	2266773(15.602%)	1798253(12.377%)	573763(3.949%)	1329688(9.152%)
13-65	Chr11	29999374	12478596	13271555	1.34	5519489	792959	4477	708068	0.873863	3134	74184	400	7174	718867	74184	0(0.0%)	56474(73.312%)	17913(23.254%)	2151(2.792%)	172(0.223%)	0(0.0%)	29206415	16695434	1227951(7.214%)	6056426(35.582%)	2866158(16.839%)	2179250(12.803%)	754368(4.432%)	1942200(11.41%)
13-65	Chr12	27804386	11783404	12429239	1.3	5519489	645835	2897	448085	0.784036	11578	155044	0	31129	491041	155044	0(0.0%)	116669(70.092%)	23147(13.906%)	9083(5.457%)	12311(7.396%)	465(0.279%)	27158551	15587898	1299090(8.167%)	6031304(37.916%)	2539701(15.966%)	1777694(11.176%)	597217(3.754%)	1793797(11.277%)
18WR-118	Chr01	43222736	16785958	16990362	1.56	2146912	204404	514	82207	0.71466	6504	87330	199	28165	116078	87330	6530(7.256%)	58715(65.245%)	3663(4.07%)	4926(5.474%)	0(0.0%)	10195(11.329%)	43018332	18951685	1154164(5.903%)	5751979(29.418%)	3393318(17.355%)	3328595(17.024%)	1226143(6.271%)	1572873(8.044%)
18WR-118	Chr02	36424110	13681001	13965878	1.64	2146912	284877	1721	266689	0.915828	0	16658	697	834	268219	16658	0(0.0%)	9910(59.491%)	6748(40.509%)	0(0.0%)	0(0.0%)	0(0.0%)	36139233	16505269	1071482(6.303%)	5309888(31.236%)	2775951(16.33%)	2767767(16.282%)	947653(5.575%)	1412827(8.311%)
18WR-118	Chr03	37174337	19928466	20211145	1.17	2146912	282679	1619	249366	0.867953	0	28915	499	3900	253764	28915	0(0.0%)	22113(76.476%)	6802(23.524%)	0(0.0%)	0(0.0%)	0(0.0%)	36891658	15439706	1211011(7.574%)	4933123(30.855%)	2403303(15.032%)	2724414(17.04%)	1047063(6.549%)	1038556(6.496%)
18WR-118	Chr04	35252627	9404981	9521673	2.74	2146912	116692	303	47599	0.874562	0	60427	0	8667	56265	60427	0(0.0%)	43202(71.495%)	17193(28.453%)	0(0.0%)	0(0.0%)	32(0.053%)	35135935	19083184	1286110(6.599%)	8252593(42.345%)	2788727(14.309%)	2376991(12.197%)	773978(3.971%)	1856999(9.528%)
18WR-118	Chr05	29940223	12493127	12539191	1.39	2146912	46064	291	45576	0	0	0	200	289	0	0	0	0	0	0	0	0	29894159	15364768	1024846(6.476%)	6343613(40.084%)	2016462(12.742%)	2156805(13.628%)	814851(5.149%)	1363697(8.617%)
18WR-118	Chr06	31392349	15383627	15581352	1.03	2146912	197725	1264	195092	0.707669	0	1864	497	273	195861	1864	0(0.0%)	1864(100.0%)	0(0.0%)	0(0.0%)	0(0.0%)	0(0.0%)	31194624	16146646	1078559(6.438%)	5936126(35.433%)	2324421(13.875%)	2436495(14.544%)	853514(5.095%)	1684494(10.055%)
18WR-118	Chr07	30253009	13156001	13180464	1.3	2146912	24463	139	22281	0.748969	0	1635	100	448	22828	1635	0(0.0%)	1635(100.0%)	0(0.0%)	0(0.0%)	0(0.0%)	0(0.0%)	30228546	15281937	1128295(7.197%)	5538298(35.328%)	2419532(15.434%)	2250418(14.355%)	777236(4.958%)	1370851(8.744%)
18WR-118	Chr08	28335664	12911049	12996582	1.19	2146912	85533	85	12918	0.785419	414	57034	99	15069	28582	57034	167(0.293%)	46417(81.305%)	4593(8.045%)	1093(1.915%)	363(0.636%)	3401(5.957%)	28250131	15454267	1052738(6.662%)	6107731(38.65%)	2273310(14.386%)	2040069(12.91%)	737489(4.667%)	1631466(10.324%)
18WR-118	Chr09	21559788	2794117	2933331	6.67	2146912	139214	839	134334	0.898996	0	4388	199	294	134826	4388	0(0.0%)	4388(100.0%)	0(0.0%)	0(0.0%)	0(0.0%)	0(0.0%)	21420574	11752143	837177(6.939%)	4425535(36.682%)	1899678(15.746%)	1530335(12.684%)	591704(4.904%)	1241404(10.29%)
18WR-118	Chr10	24733684	8300973	8515407	1.95	2146912	214434	969	155157	0.894716	0	53037	100	6141	161462	53037	1259(2.374%)	45106(85.046%)	2288(4.314%)	2166(4.084%)	0(0.0%)	1421(2.679%)	24519250	14432200	952621(6.473%)	6076661(41.291%)	2253647(15.314%)	1789618(12.161%)	567376(3.855%)	1338850(9.098%)
18WR-118	Chr11	29221449	12735749	12856949	1.28	2146912	121200	361	56543	0.856769	3370	55397	100	5791	65803	55397	0(0.0%)	48454(84.528%)	6873(11.99%)	1574(2.746%)	172(0.3%)	0(0.0%)	29100249	16655692	1157698(6.819%)	6109493(35.988%)	2815961(16.587%)	2193470(12.921%)	738416(4.35%)	1969836(11.603%)
18WR-118	Chr12	27042906	11214857	11644484	1.37	2146912	429627	1212	192447	0.748386	12798	177503	400	46480	252374	177503	0(0.0%)	127872(67.488%)	30777(16.243%)	13051(6.888%)	12328(6.506%)	521(0.275%)	26613279	15386985	1323386(8.43%)	5917182(37.695%)	2618422(16.68%)	1677476(10.686%)	585208(3.728%)	1730395(11.023%)
18XHB-49	Chr01	42847524	16968473	17091795	1.52	2613351	123322	639	101728	0.890854	0	19238	199	2158	104084	19238	0(0.0%)	18360(95.436%)	878(4.564%)	0(0.0%)	0(0.0%)	0(0.0%)	42724202	18471693	1003584(5.266%)	5665661(29.732%)	3364210(17.654%)	3272670(17.174%)	1232938(6.47%)	1467314(7.7%)
18XHB-49	Chr02	37257454	14152970	14215513	1.63	2613351	62543	197	30666	0.921137	0	29364	100	2414	33179	29364	0(0.0%)	14905(50.759%)	14459(49.241%)	0(0.0%)	0(0.0%)	0(0.0%)	37194911	17457815	958760(5.337%)	6396554(35.605%)	2779581(15.472%)	2810742(15.645%)	976954(5.438%)	1356918(7.553%)
18XHB-49	Chr03	38647216	20841072	21188646	1.19	2613351	347574	1367	208052	0.943379	0	131623	200	7700	215951	131623	0(0.0%)	105768(80.357%)	25545(19.408%)	0(0.0%)	0(0.0%)	0(0.0%)	38299642	16806610	1115148(6.432%)	6251109(36.057%)	2460992(14.195%)	2669609(15.398%)	1069744(6.17%)	1147174(6.617%)
18XHB-49	Chr04	35237597	9131804	9161778	2.86	2613351	29974	94	14733	0.946989	0	14434	0	808	15540	14434	0(0.0%)	13605(94.257%)	829(5.743%)	0(0.0%)	0(0.0%)	0(0.0%)	35207623	19368708	1161335(5.881%)	9027627(45.718%)	2573191(13.031%)	2238992(11.339%)	723276(3.663%)	1972999(9.992%)
18XHB-49	Chr05	31060547	12935912	13006982	1.4	2613351	71070	187	29226	0.933206	0	39050	99	2696	32020	39050	0(0.0%)	30569(78.282%)	8481(21.718%)	0(0.0%)	0(0.0%)	0(0.0%)	30989477	16203389	946319(5.601%)	7359143(43.557%)	2094223(12.395%)	2113038(12.506%)	789221(4.671%)	1282643(7.592%)
18XHB-49	Chr06	31649574	15191400	15326314	1.07	2613351	134914	471	70982	0.79089	0	50564	200	13169	84350	50564	0(0.0%)	19598(38.759%)	26826(53.054%)	76(0.15%)	0(0.0%)	0(0.0%)	31514660	16694521	1046757(6.124%)	6796896(39.768%)	2355294(13.781%)	2378236(13.915%)	831789(4.867%)	1486560(8.698%)
18XHB-49	Chr07	31122380	13871165	14081969	1.23	2613351	210804	897	139198	0.978005	0	70032	0	1575	140772	70032	0(0.0%)	61372(87.634%)	8179(11.679%)	0(0.0%)	0(0.0%)	0(0.0%)	30911576	16969538	1169194(6.75%)	7629274(44.046%)	2316101(13.372%)	2112986(12.199%)	705294(4.072%)	1313519(7.583%)
18XHB-49	Chr08	30072091	13729020	13898275	1.18	2613351	169255	744	114521	0.923815	0	50565	0	4170	118690	50565	0(0.0%)	35456(70.12%)	13888(27.466%)	0(0.0%)	0(0.0%)	0(0.0%)	29902836	17066390	1078478(6.189%)	7731757(44.37%)	2294658(13.168%)	2121850(12.177%)	751491(4.313%)	1507282(8.65%)
18XHB-49	Chr09	23305554	2798087	3004907	7.26	2613351	206820	668	109505	0.94711	0	92169	100	5047	114651	92169	0(0.0%)	76016(82.475%)	7773(8.433%)	0(0.0%)	0(0.0%)	8327(9.034%)	23098734	12426195	868596(6.817%)	4736393(37.175%)	1961875(15.398%)	1608664(12.626%)	602459(4.729%)	1227737(9.636%)
18XHB-49	Chr10	25275070	9092727	9393260	1.75	2613351	300533	485	79739	0.741452	8283	163709	200	48603	136824	163709	3041(1.833%)	110789(66.769%)	33558(20.224%)	13677(8.243%)	0(0.0%)	1552(0.935%)	24974537	14569007	895173(5.917%)	6551057(43.299%)	2022197(13.366%)	1731124(11.442%)	576388(3.81%)	1370493(9.058%)
18XHB-49	Chr11	31763849	12545726	13138778	1.48	2613351	593052	1524	238926	0.934365	1470	330884	400	21373	262168	330884	0(0.0%)	238889(72.197%)	87870(26.556%)	822(0.248%)	172(0.052%)	1778(0.537%)	31170797	18647382	1095262(5.772%)	7886541(41.559%)	2911806(15.344%)	2219854(11.698%)	731020(3.852%)	2121016(11.177%)
18XHB-49	Chr12	25993747	10992477	11355967	1.33	2613351	363490	860	134311	0.850467	7783	194910	200	26287	168666	194910	0(0.0%)	171463(87.693%)	10818(5.533%)	6978(3.569%)	1808(0.925%)	62(0.032%)	25630257	14376356	1149769(7.833%)	5547725(37.797%)	2389754(16.281%)	1701423(11.592%)	581078(3.959%)	1530601(10.428%)
18XHB-57	Chr01	44774159	17215573	18056041	1.55	3853406	840468	4201	657298	0.924759	0	169389	0	13782	671079	169389	0(0.0%)	121940(71.988%)	45558(26.895%)	749(0.442%)	0(0.0%)	0(0.0%)	43933691	19742492	1045314(5.142%)	7044763(34.652%)	3310954(16.286%)	3212879(15.804%)	1212269(5.963%)	1455824(7.161%)
18XHB-57	Chr02	37943442	14068814	14664569	1.65	3853406	595755	3430	533377	0.971353	0	60592	0	1787	535163	60592	0(0.0%)	47026(77.611%)	13566(22.389%)	0(0.0%)	0(0.0%)	0(0.0%)	37347687	17600720	992786(5.488%)	6686965(36.963%)	2681736(14.824%)	2715566(15.011%)	997504(5.514%)	1311907(7.252%)
18XHB-57	Chr03	39656127	21079270	21201943	1.14	3853406	122673	610	93400	0.972638	0	28473	0	801	94200	28473	0(0.0%)	28473(100.0%)	0(0.0%)	0(0.0%)	0(0.0%)	0(0.0%)	39533454	17712584	1219265(6.588%)	6955774(37.586%)	2460035(13.293%)	2793814(15.096%)	1044330(5.643%)	1094428(5.914%)
18XHB-57	Chr04	36120162	9120263	9177000	2.95	3853406	56737	113	17586	0.851783	0	33349	0	5803	23388	33349	0(0.0%)	32454(97.316%)	864(2.591%)	0(0.0%)	0(0.0%)	31(0.093%)	36063425	19950916	1129081(5.55%)	9471456(46.555%)	2618168(12.869%)	2306018(11.335%)	739951(3.637%)	1954320(9.606%)
18XHB-57	Chr05	31618480	12788869	13094715	1.45	3853406	305846	1447	225449	0.952785	0	76602	0	3796	229244	76602	0(0.0%)	64582(84.309%)	12020(15.691%)	0(0.0%)	0(0.0%)	0(0.0%)	31312634	16464617	998554(5.807%)	7662790(44.561%)	2055133(11.951%)	2134251(12.411%)	802657(4.668%)	1206933(7.019%)
18XHB-57	Chr06	33460307	16726938	16851804	1.01	3853406	124866	703	101881	0.900809	0	20706	0	2280	104160	20706	0(0.0%)	13414(64.783%)	6283(30.344%)	0(0.0%)	0(0.0%)	0(0.0%)	33335441	17946764	1054026(5.659%)	8007985(42.996%)	2312824(12.418%)	2396517(12.867%)	818762(4.396%)	1538941(8.263%)
18XHB-57	Chr07	30372770	12517020	12916847	1.39	3853406	399827	2550	394223	0.917574	0	5143	0	462	394684	5143	0(0.0%)	4296(83.531%)	847(16.469%)	0(0.0%)	0(0.0%)	0(0.0%)	29972943	15939265	1097771(6.738%)	6717133(41.228%)	2285386(14.027%)	2164115(13.283%)	710241(4.359%)	1242191(7.624%)
18XHB-57	Chr08	31301545	13285002	13420549	1.35	3853406	135547	399	60400	0.897935	0	67478	0	7670	68069	67478	0(0.0%)	43919(65.086%)	22946(34.005%)	0(0.0%)	0(0.0%)	0(0.0%)	31165998	17668088	1027935(5.504%)	8366631(44.799%)	2251598(12.056%)	2119338(11.348%)	770773(4.127%)	1532224(8.204%)
18XHB-57	Chr09	24877891	3381046	3576894	6.3	3853406	195848	646	105779	0.920528	0	82912	0	7158	112936	82912	0(0.0%)	76632(92.426%)	0(0.0%)	0(0.0%)	0(0.0%)	6216(7.497%)	24682043	13630406	813233(5.754%)	5861784(41.475%)	2025345(14.33%)	1609895(11.391%)	610016(4.316%)	1143293(8.089%)
18XHB-57	Chr10	27279972	9636760	9869872	1.81	3853406	233112	458	75753	0.85387	950	134365	0	22045	98747	134365	4113(3.058%)	80646(59.959%)	30121(22.395%)	6739(5.01%)	0(0.0%)	8423(6.262%)	27046860	16069781	884051(5.311%)	7593148(45.618%)	2369843(14.237%)	1870190(11.236%)	586069(3.521%)	1300238(7.811%)
18XHB-57	Chr11	32783001	13085362	13466877	1.48	3853406	381515	1377	214664	0.958011	0	159846	0	7006	221669	159846	0(0.0%)	118785(74.312%)	40478(25.323%)	75(0.047%)	0(0.0%)	0(0.0%)	32401486	19659219	1102484(5.466%)	8697687(43.126%)	3044809(15.097%)	2221552(11.015%)	765461(3.795%)	2162308(10.721%)
18XHB-57	Chr12	27690632	11032452	11493664	1.47	3853406	461212	955	149793	0.880069	5755	274071	0	31594	187331	274071	0(0.0%)	232009(83.336%)	30346(10.9%)	8645(3.105%)	4010(1.44%)	194(0.07%)	27229420	15304929	1025399(6.335%)	6707254(41.438%)	2401004(14.834%)	1667614(10.303%)	612325(3.783%)	1459866(9.019%)
18XHB-83	Chr01	44153183	16958497	17556294	1.57	4031690	597797	2872	452796	0.862747	0	125100	0	19902	472697	125100	0(0.0%)	102063(81.585%)	22712(18.155%)	0(0.0%)	0(0.0%)	0(0.0%)	43555386	19496445	1004356(5.0%)	7005179(34.872%)	3177269(15.817%)	3268997(16.273%)	1201772(5.982%)	1393600(6.937%)
18XHB-83	Chr02	40458590	14011417	14569393	1.85	4031690	557976	3191	496415	0.941246	0	57945	0	3617	500031	57945	0(0.0%)	44379(76.588%)	13566(23.412%)	0(0.0%)	0(0.0%)	0(0.0%)	39900614	18740415	1120890(5.818%)	7163716(37.184%)	2889682(14.999%)	2905089(15.079%)	1027349(5.333%)	1304760(6.773%)
18XHB-83	Chr03	39494835	21139283	21433379	1.17	4031690	294096	1565	237812	0.919961	0	51780	0	4505	242316	51780	0(0.0%)	49051(94.73%)	2418(4.67%)	0(0.0%)	0(0.0%)	0(0.0%)	39200739	17364872	1158853(6.362%)	6650249(36.511%)	2456721(13.488%)	2786395(15.298%)	1071939(5.885%)	1101277(6.046%)
18XHB-83	Chr04	36876724	10295830	10446411	2.57	4031690	150581	410	63849	0.943482	0	81831	0	4902	68750	81831	0(0.0%)	65988(80.637%)	15685(19.167%)	0(0.0%)	0(0.0%)	160(0.196%)	36726143	20747441	1172948(5.552%)	10114273(47.874%)	2536053(12.004%)	2325624(11.008%)	731826(3.464%)	2132670(10.095%)
18XHB-83	Chr05	31167413	12655001	12775317	1.45	4031690	120316	723	112823	0.971444	0	7280	0	214	113036	7280	0(0.0%)	7280(100.0%)	0(0.0%)	0(0.0%)	0(0.0%)	0(0.0%)	31047097	16173471	952578(5.634%)	7430049(43.947%)	2048069(12.114%)	2092230(12.375%)	806893(4.773%)	1219860(7.215%)
18XHB-83	Chr06	30534475	16216820	16342855	1.14	4031690	126035	662	98761	0.79461	0	21673	0	5602	104362	21673	0(0.0%)	13467(62.137%)	7196(33.203%)	0(0.0%)	0(0.0%)	0(0.0%)	30408440	16835065	1048069(6.094%)	7495724(43.584%)	2120081(12.327%)	2252767(13.099%)	764141(4.443%)	1456264(8.467%)
18XHB-83	Chr07	30617403	13039378	13600774	1.31	4031690	561396	3515	543734	0.944347	0	16680	0	983	544716	16680	0(0.0%)	15821(94.85%)	859(5.15%)	0(0.0%)	0(0.0%)	0(0.0%)	30056007	16027937	1108299(6.763%)	6773627(41.331%)	2276261(13.889%)	2174205(13.266%)	705151(4.303%)	1278572(7.802%)
18XHB-83	Chr08	30278517	13008170	13144704	1.32	4031690	136534	405	62224	0.908452	0	67508	0	6803	69026	67508	0(0.0%)	43976(65.142%)	22919(33.95%)	0(0.0%)	0(0.0%)	0(0.0%)	30141983	17043906	997291(5.603%)	7964889(44.745%)	2234142(12.551%)	2083768(11.706%)	736646(4.138%)	1438734(8.083%)
18XHB-83	Chr09	25340219	3386341	3610956	6.42	4031690	224615	821	134289	0.932733	0	84251	0	6076	140364	84251	0(0.0%)	77971(92.546%)	0(0.0%)	0(0.0%)	0(0.0%)	6216(7.378%)	25115604	14195305	794315(5.46%)	6202372(42.638%)	2180489(14.99%)	1647358(11.325%)	648104(4.455%)	1127204(7.749%)
18XHB-83	Chr10	26127678	9909104	10311754	1.6	4031690	402650	942	153231	0.872232	1369	217552	0	30499	185098	217552	3041(1.396%)	154959(71.125%)	51533(23.653%)	3888(1.785%)	0(0.0%)	1955(0.897%)	25725028	15123823	858235(5.472%)	6834290(43.576%)	2341585(14.93%)	1746764(11.138%)	548967(3.5%)	1350827(8.613%)
18XHB-83	Chr11	32930091	13647342	14074787	1.38	4031690	427445	1273	199041	0.91519	1470	209034	0	17901	218503	209034	0(0.0%)	158727(75.934%)	46248(22.125%)	819(0.392%)	172(0.082%)	1680(0.804%)	32502646	19853075	1064921(5.227%)	9068208(44.508%)	2966204(14.559%)	2270433(11.144%)	750895(3.686%)	2089765(10.257%)
18XHB-83	Chr12	28304223	12200667	12632916	1.28	4031690	432249	782	122850	0.842253	12010	260593	0	36797	171822	260593	0(0.0%)	219440(80.697%)	33697(12.392%)	9068(3.335%)	4770(1.754%)	469(0.172%)	27871974	15793890	1095517(6.551%)	6922588(41.399%)	2399909(14.352%)	1673905(10.01%)	603165(3.607%)	1627575(9.733%)
9311	Chr01	44997785	17553596	18324960	1.52	3346919	771364	3541	556225	0.734987	0	158125	0	57015	613239	158125	0(0.0%)	121160(76.623%)	35334(22.346%)	749(0.474%)	0(0.0%)	0(0.0%)	44226421	20130819	1037995(5.01%)	7518457(36.288%)	3206170(15.475%)	3232657(15.603%)	1222063(5.898%)	1460030(7.047%)
9311	Chr02	39003553	14182608	14726469	1.71	3346919	543861	3158	491237	0.933834	0	49143	0	3482	494718	49143	0(0.0%)	35577(72.395%)	13566(27.605%)	0(0.0%)	0(0.0%)	0(0.0%)	38459692	18692022	991545(5.165%)	7691532(40.065%)	2711699(14.125%)	2693336(14.029%)	988825(5.151%)	1435030(7.475%)
9311	Chr03	39427109	21150187	21275507	1.17	3346919	125320	631	96610	0.988158	0	28371	0	340	96949	28371	0(0.0%)	28371(100.0%)	0(0.0%)	0(0.0%)	0(0.0%)	0(0.0%)	39301789	17544173	1140220(6.221%)	6872731(37.5%)	2459711(13.421%)	2761736(15.069%)	1055811(5.761%)	1129404(6.162%)
9311	Chr04	38221073	10570681	10723878	2.6	3346919	153197	430	67119	0.950743	0	81839	0	4240	71358	81839	0(0.0%)	65965(80.601%)	15716(19.203%)	0(0.0%)	0(0.0%)	160(0.196%)	38067876	21730000	1169590(5.289%)	10344194(46.779%)	2890351(13.071%)	2404189(10.872%)	767127(3.469%)	2360959(10.677%)
9311	Chr05	30998739	12572089	12678612	1.46	3346919	106523	678	105995	0.882798	0	467	0	62	106056	467	0(0.0%)	467(100.0%)	0(0.0%)	0(0.0%)	0(0.0%)	0(0.0%)	30892216	16129782	959598(5.713%)	7356006(43.797%)	2061060(12.271%)	2057923(12.253%)	817825(4.869%)	1243578(7.404%)
9311	Chr06	32384097	15717233	15842790	1.05	3346919	125557	710	102676	0.904903	0	20706	0	2176	104851	20706	0(0.0%)	13414(64.783%)	6283(30.344%)	0(0.0%)	0(0.0%)	0(0.0%)	32258540	17224342	1024079(5.81%)	7178847(40.725%)	2438739(13.835%)	2441526(13.851%)	853870(4.844%)	1469439(8.336%)
9311	Chr07	30807636	12822693	13322598	1.36	3346919	499905	3148	486891	0.94345	0	12279	0	736	487626	12279	0(0.0%)	11432(93.102%)	847(6.898%)	0(0.0%)	0(0.0%)	0(0.0%)	30307731	16293468	1095641(6.56%)	6985519(41.826%)	2279600(13.649%)	2168761(12.985%)	715523(4.284%)	1321552(7.913%)
9311	Chr08	31625595	13999135	14224946	1.24	3346919	225811	642	97480	0.864913	0	110996	0	17336	114898	110996	167(0.15%)	86245(77.439%)	18333(16.461%)	1156(1.038%)	164(0.147%)	4129(3.707%)	31399784	17788669	1089880(5.737%)	8386491(44.148%)	2230969(11.744%)	2053110(10.808%)	762902(4.016%)	1662375(8.751%)
9311	Chr09	24759485	3064191	3282978	7.01	3346919	218787	777	127109	0.928719	0	85144	0	6535	133643	85144	0(0.0%)	78863(92.623%)	0(0.0%)	0(0.0%)	0(0.0%)	6217(7.302%)	24540698	13723086	881527(6.206%)	5961675(41.968%)	1894162(13.334%)	1623945(11.432%)	623304(4.388%)	1164263(8.196%)
9311	Chr10	26167543	9832408	9937934	1.65	3346919	105526	463	73284	0.844462	0	27228	0	5015	78298	27228	0(0.0%)	22662(83.23%)	3707(13.615%)	433(1.59%)	0(0.0%)	0(0.0%)	26062017	15363808	871330(5.462%)	7336373(45.989%)	2125130(13.322%)	1827245(11.454%)	557001(3.492%)	1232919(7.729%)
9311	Chr11	33218027	13653059	14006342	1.41	3346919	353283	1765	273545	0.959142	0	76481	0	3258	276802	76481	0(0.0%)	53351(69.682%)	23170(30.263%)	0(0.0%)	0(0.0%)	42(0.055%)	32864744	19956749	1073961(5.244%)	9025875(44.076%)	3026680(14.78%)	2247056(10.973%)	774606(3.783%)	2146451(10.482%)
9311	Chr12	26942624	11426107	11543892	1.35	3346919	117785	137	21828	0.860533	0	82575	0	13383	35210	82575	0(0.0%)	68265(82.67%)	4288(5.193%)	7354(8.906%)	2134(2.584%)	56(0.068%)	26824839	15101947	1098491(6.875%)	6626474(41.474%)	2238459(14.01%)	1590456(9.954%)	601938(3.767%)	1524721(9.543%)
Balatinaw	Chr01	44511793	17168537	17829568	1.55	4256974	661031	2749	433158	0.643176	0	146563	0	81311	514468	146563	0(0.0%)	109549(74.745%)	35383(24.142%)	749(0.511%)	0(0.0%)	0(0.0%)	43850762	19779959	1014721(4.98%)	7167778(35.176%)	3194210(15.676%)	3206447(15.736%)	1204101(5.909%)	1512186(7.421%)
Balatinaw	Chr02	38403553	14244370	14761423	1.66	4256974	517053	2991	465096	0.930502	0	48347	0	3611	468706	48347	0(0.0%)	34782(71.942%)	13565(28.058%)	0(0.0%)	0(0.0%)	0(0.0%)	37886500	18168454	939468(5.035%)	7226508(38.727%)	2681720(14.371%)	2723389(14.595%)	975824(5.229%)	1431728(7.673%)
Balatinaw	Chr03	39727810	20954469	21318491	1.14	4256974	364022	1583	240619	0.788799	0	97341	0	26063	266681	97341	2527(2.595%)	78238(80.331%)	8330(8.553%)	1038(1.066%)	4452(4.571%)	1039(1.067%)	39363788	17587545	1194788(6.5%)	6843064(37.23%)	2470096(13.439%)	2757965(15.005%)	1055229(5.741%)	1126719(6.13%)
Balatinaw	Chr04	37104239	9459101	9571667	2.91	4256974	112566	449	69833	0.971545	0	41518	0	1216	71048	41518	0(0.0%)	40623(97.84%)	866(2.086%)	0(0.0%)	0(0.0%)	31(0.075%)	36991673	20925393	1137275(5.336%)	10323807(48.442%)	2607019(12.233%)	2316843(10.871%)	745695(3.499%)	2057689(9.655%)
Balatinaw	Chr05	31408129	12670008	12774537	1.47	4256974	104529	650	101473	0.979719	0	2995	0	62	101534	2995	0(0.0%)	2995(100.0%)	0(0.0%)	0(0.0%)	0(0.0%)	0(0.0%)	31303600	16371330	936686(5.466%)	7538767(43.995%)	2089878(12.196%)	2082757(12.155%)	821461(4.794%)	1243108(7.255%)
Balatinaw	Chr06	32299372	15643177	15777353	1.06	4256974	134176	739	111228	0.942133	0	21621	0	1328	112555	21621	0(0.0%)	13450(62.208%)	7161(33.121%)	0(0.0%)	0(0.0%)	0(0.0%)	32165196	17233501	1058832(6.003%)	7261379(41.165%)	2329259(13.205%)	2399999(13.606%)	838964(4.756%)	1522310(8.63%)
Balatinaw	Chr07	30815611	12834043	13247382	1.37	4256974	413339	2605	402815	0.915914	0	9640	0	885	403699	9640	0(0.0%)	8732(90.581%)	908(9.419%)	0(0.0%)	0(0.0%)	0(0.0%)	30402272	16345732	1133388(6.781%)	7052054(42.189%)	2305092(13.79%)	2196271(13.139%)	712962(4.265%)	1227228(7.342%)
Balatinaw	Chr08	33372939	14027137	14286972	1.36	4256974	259835	406	60884	0.881936	0	175463	0	23489	84455	175463	167(0.095%)	120557(68.558%)	47285(26.89%)	1091(0.62%)	164(0.093%)	4395(2.499%)	33113104	18945515	1067634(5.199%)	9412873(45.839%)	2329367(11.344%)	2099177(10.223%)	752011(3.662%)	1642311(7.998%)
Balatinaw	Chr09	24735789	3415368	3642000	6.18	4256974	226632	862	141223	0.936331	0	79972	0	5438	146660	79972	0(0.0%)	73692(92.147%)	0(0.0%)	0(0.0%)	0(0.0%)	6216(7.773%)	24509157	13501199	841629(6.014%)	5795944(41.413%)	1996764(14.267%)	1571006(11.225%)	620090(4.431%)	1066513(7.62%)
Balatinaw	Chr10	25811455	9579219	9669529	1.69	4256974	90310	391	62509	0.926912	0	25770	0	2032	64540	25770	0(0.0%)	24880(96.546%)	890(3.454%)	0(0.0%)	0(0.0%)	0(0.0%)	25721145	15199259	851218(5.407%)	7197242(45.717%)	2090248(13.277%)	1797709(11.419%)	563567(3.58%)	1266876(8.047%)
Balatinaw	Chr11	34776830	14362822	14778737	1.39	4256974	415915	1253	195899	0.900467	1470	198118	0	20429	217889	198118	0(0.0%)	156020(78.751%)	38035(19.198%)	819(0.413%)	172(0.087%)	1680(0.848%)	34360915	21448466	1146132(5.215%)	10159069(46.225%)	3059503(13.921%)	2277775(10.364%)	757781(3.448%)	2344364(10.667%)
Balatinaw	Chr12	28277824	11301097	12258663	1.42	4256974	957566	1643	256998	0.845086	10099	592041	0	98429	366086	592041	10432(1.746%)	474926(79.49%)	64459(10.789%)	21298(3.565%)	6614(1.107%)	4699(0.786%)	27320258	15432978	1026468(6.298%)	6682679(41.001%)	2348408(14.408%)	1682047(10.32%)	612851(3.76%)	1597364(9.8%)
Cempo-Abang	Chr01	44770600	17166022	17916759	1.56	3585393	750737	3453	543086	0.749229	0	155579	0	52073	595158	155579	0(0.0%)	126330(81.2%)	27618(17.752%)	749(0.481%)	0(0.0%)	0(0.0%)	44019863	19892023	1025878(5.01%)	7150472(34.92%)	3221837(15.734%)	3254689(15.894%)	1219335(5.955%)	1519149(7.419%)
Cempo-Abang	Chr02	38706014	14220722	14737497	1.69	3585393	516775	2767	430222	0.955623	0	82713	0	3841	434062	82713	0(0.0%)	69147(83.599%)	13566(16.401%)	0(0.0%)	0(0.0%)	0(0.0%)	38189239	18446374	1018703(5.376%)	7402225(39.062%)	2707883(14.29%)	2682927(14.158%)	1001726(5.286%)	1416489(7.475%)
Cempo-Abang	Chr03	39101970	20538596	20974792	1.13	3585393	436196	2628	405824	0.96194	0	29217	0	1156	406979	29217	0(0.0%)	29217(100.0%)	0(0.0%)	0(0.0%)	0(0.0%)	0(0.0%)	38665774	16945419	1151260(6.494%)	6305209(35.565%)	2443947(13.785%)	2800079(15.794%)	1052165(5.935%)	1049231(5.918%)
Cempo-Abang	Chr04	37390889	10096519	10195868	2.69	3585393	99349	361	56214	0.962491	0	41518	0	1618	57831	41518	0(0.0%)	40623(97.84%)	866(2.086%)	0(0.0%)	0(0.0%)	31(0.075%)	37291540	21030613	1108057(5.169%)	10228759(47.713%)	2769911(12.921%)	2364571(11.03%)	767991(3.582%)	2059487(9.607%)
Cempo-Abang	Chr05	31334296	12690635	12798954	1.46	3585393	108319	691	107791	0.882798	0	467	0	62	107852	467	0(0.0%)	467(100.0%)	0(0.0%)	0(0.0%)	0(0.0%)	0(0.0%)	31225977	16356793	969728(5.677%)	7524298(44.051%)	2065836(12.094%)	2077955(12.165%)	814929(4.771%)	1253724(7.34%)
Cempo-Abang	Chr06	32448332	15667371	15788321	1.06	3585393	120950	679	98566	0.924994	0	20706	0	1679	100244	20706	0(0.0%)	13414(64.783%)	6283(30.344%)	0(0.0%)	0(0.0%)	0(0.0%)	32327382	17427611	1042591(5.852%)	7561295(42.438%)	2330098(13.078%)	2406513(13.507%)	812922(4.563%)	1474769(8.277%)
Cempo-Abang	Chr07	31128912	12851494	13361474	1.38	3585393	509980	3231	499622	0.92731	0	9606	0	753	500374	9606	0(0.0%)	8698(90.548%)	908(9.452%)	0(0.0%)	0(0.0%)	0(0.0%)	30618932	16381099	1132875(6.648%)	7145989(41.935%)	2276216(13.358%)	2145695(12.592%)	696412(4.087%)	1270051(7.453%)
Cempo-Abang	Chr08	30968244	13143592	13273680	1.35	3585393	130088	409	62767	0.949794	0	63942	0	3380	66146	63942	0(0.0%)	40383(63.156%)	22946(35.886%)	0(0.0%)	0(0.0%)	0(0.0%)	30838156	17203620	1019719(5.567%)	7873920(42.989%)	2303751(12.578%)	2115233(11.548%)	756452(4.13%)	1517838(8.287%)
Cempo-Abang	Chr09	25149802	3167871	3386658	6.87	3585393	218787	760	124379	0.90234	0	85189	0	9220	133598	85189	0(0.0%)	78908(92.627%)	0(0.0%)	0(0.0%)	0(0.0%)	6217(7.298%)	24931015	13705143	900403(6.209%)	6122248(42.22%)	1963661(13.542%)	1648549(11.369%)	633881(4.371%)	1154324(7.96%)
Cempo-Abang	Chr10	26202568	9430869	9661870	1.75	3585393	231001	498	82501	0.846008	950	125633	0	21918	105368	125633	3936(3.13%)	76998(61.222%)	25362(20.166%)	6739(5.358%)	0(0.0%)	8423(6.697%)	25971567	15386865	900129(5.645%)	6987858(43.822%)	2427608(15.224%)	1811118(11.358%)	564816(3.542%)	1257106(7.884%)
Cempo-Abang	Chr11	34132253	14298287	14643709	1.36	3585393	345422	1724	267431	0.961958	0	75025	0	2967	270371	75025	0(0.0%)	51882(69.129%)	23169(30.871%)	0(0.0%)	0(0.0%)	0(0.0%)	33786831	20655734	1096450(5.178%)	9406556(44.425%)	3073345(14.515%)	2348504(11.091%)	797119(3.765%)	2240681(10.582%)
Cempo-Abang	Chr12	26815563	11321809	11439598	1.36	3585393	117789	138	22038	0.862123	0	82550	0	13202	35239	82550	0(0.0%)	68276(82.709%)	4288(5.194%)	7318(8.865%)	2134(2.585%)	56(0.068%)	26697774	14964472	1055728(6.67%)	6407065(40.478%)	2326037(14.695%)	1657859(10.474%)	582677(3.681%)	1519345(9.599%)
Cempo-Ireng	Chr01	44369536	16936622	17706185	1.57	3271876	769563	3475	546167	0.662601	3486	148023	0	71888	621569	148023	6534(4.398%)	100871(67.891%)	29921(20.138%)	950(0.639%)	0(0.0%)	6543(4.404%)	43599973	19580219	969488(4.807%)	6934171(34.381%)	3221222(15.971%)	3292857(16.326%)	1220525(6.052%)	1502285(7.449%)
Cempo-Ireng	Chr02	37997390	13881062	14428815	1.7	3271876	547753	3185	495354	0.937347	0	49117	0	3283	498636	49117	0(0.0%)	35551(72.38%)	13566(27.62%)	0(0.0%)	0(0.0%)	0(0.0%)	37449637	17821184	968032(5.283%)	7029834(38.364%)	2651188(14.468%)	2699757(14.734%)	986986(5.386%)	1358306(7.413%)
Cempo-Ireng	Chr03	39410824	21264583	21391293	1.18	3271876	126710	639	97888	0.985983	0	28419	0	404	98291	28419	0(0.0%)	28419(100.0%)	0(0.0%)	0(0.0%)	0(0.0%)	0(0.0%)	39284114	17517874	1147823(6.268%)	6809654(37.186%)	2487920(13.586%)	2775136(15.154%)	1048409(5.725%)	1148635(6.272%)
Cempo-Ireng	Chr04	37483955	10623801	10730740	2.52	3271876	106939	407	63389	0.953319	0	41518	0	2033	65421	41518	0(0.0%)	40623(97.84%)	866(2.086%)	0(0.0%)	0(0.0%)	31(0.075%)	37377016	21211783	1105766(5.116%)	10456283(48.382%)	2714778(12.561%)	2338269(10.819%)	739354(3.421%)	2124174(9.829%)
Cempo-Ireng	Chr05	31467965	12548614	12643665	1.5	3271876	95051	597	93193	0.928456	0	1726	0	133	93325	1726	0(0.0%)	1726(100.0%)	0(0.0%)	0(0.0%)	0(0.0%)	0(0.0%)	31372914	16374327	1005777(5.852%)	7371372(42.891%)	2106742(12.258%)	2124303(12.36%)	824131(4.795%)	1289429(7.503%)
Cempo-Ireng	Chr06	32168157	15668840	15791014	1.05	3271876	122174	617	92992	0.898091	0	26209	0	2974	95965	26209	0(0.0%)	18062(68.915%)	7137(27.231%)	0(0.0%)	0(0.0%)	0(0.0%)	32045983	17005819	1065780(6.05%)	7217620(40.975%)	2248437(12.764%)	2390529(13.571%)	816275(4.634%)	1467544(8.331%)
Cempo-Ireng	Chr07	30921816	12950518	13446902	1.35	3271876	496384	3144	486051	0.926843	0	9578	0	756	486806	9578	0(0.0%)	8731(91.157%)	847(8.843%)	0(0.0%)	0(0.0%)	0(0.0%)	30425432	16310179	1149426(6.875%)	7016774(41.967%)	2317401(13.86%)	2127413(12.724%)	734876(4.395%)	1231834(7.368%)
Cempo-Ireng	Chr08	31504299	13148100	13419968	1.38	3271876	271868	477	71776	0.876902	0	175462	0	24631	96489	175462	167(0.095%)	120577(68.698%)	47025(26.792%)	1091(0.622%)	29(0.017%)	4395(2.504%)	31232431	17233705	1041776(5.574%)	8017285(42.894%)	2219803(11.876%)	2089468(11.179%)	740392(3.961%)	1506306(8.059%)
Cempo-Ireng	Chr09	24635368	3380598	3557580	6.23	3271876	176982	573	93826	0.911048	0	75760	0	7397	101222	75760	0(0.0%)	69482(91.713%)	0(0.0%)	0(0.0%)	0(0.0%)	6215(8.204%)	24458386	13556795	847489(6.029%)	5930449(42.189%)	1973956(14.043%)	1598686(11.373%)	606771(4.317%)	1114931(7.932%)
Cempo-Ireng	Chr10	25888556	9611001	9703733	1.68	3271876	92732	407	64798	0.924933	0	25838	0	2097	66894	25838	0(0.0%)	24954(96.579%)	884(3.421%)	0(0.0%)	0(0.0%)	0(0.0%)	25795824	15252221	883462(5.583%)	6979783(44.106%)	2376937(15.02%)	1791327(11.32%)	543548(3.435%)	1252124(7.912%)
Cempo-Ireng	Chr11	33816307	14098843	14446940	1.37	3271876	348097	1742	270191	0.962699	0	75001	0	2906	273096	75001	0(0.0%)	51831(69.107%)	23170(30.893%)	0(0.0%)	0(0.0%)	0(0.0%)	33468210	19869665	1095793(5.181%)	8873430(41.955%)	2988586(14.13%)	2218716(10.49%)	801237(3.788%)	2234773(10.566%)
Cempo-Ireng	Chr12	26783264	11296281	11413904	1.36	3271876	117623	137	21882	0.867623	0	83068	0	12674	34555	83068	0(0.0%)	68345(82.276%)	4315(5.195%)	7403(8.912%)	2471(2.975%)	56(0.067%)	26665641	14783121	1053803(6.704%)	6367720(40.511%)	2279946(14.505%)	1614965(10.274%)	590836(3.759%)	1463584(9.311%)
CW01	Chr01	46307808	18425116	18940287	1.49	2695286	515171	2028	321152	0.865571	852	167938	0	25230	347233	167938	8051(4.794%)	132961(79.172%)	16870(10.045%)	3195(1.902%)	0(0.0%)	3985(2.373%)	45792637	21588470	1075500(4.848%)	8269932(37.279%)	3399893(15.326%)	3482451(15.698%)	1278526(5.763%)	1533220(6.911%)
CW01	Chr02	40227795	15590698	15944473	1.56	2695286	353775	2017	313371	0.924836	0	37368	0	3037	316407	37368	0(0.0%)	27972(74.855%)	9396(25.145%)	0(0.0%)	0(0.0%)	0(0.0%)	39874020	19826404	986439(4.789%)	7844465(38.081%)	3180961(15.442%)	3013693(14.63%)	1006863(4.888%)	1533388(7.444%)
CW01	Chr03	42446633	22102134	22285513	1.1	2695286	183379	1186	182346	0.76499	0	791	0	243	182588	791	0(0.0%)	791(100.0%)	0(0.0%)	0(0.0%)	0(0.0%)	0(0.0%)	42263254	20350465	1242588(5.951%)	8735969(41.84%)	2752842(13.184%)	3014337(14.437%)	1105971(5.297%)	1295912(6.207%)
CW01	Chr04	37122362	9825812	10039704	2.76	2695286	213892	895	142254	0.931197	0	66710	0	4929	147182	66710	0(0.0%)	53869(80.749%)	12811(19.203%)	0(0.0%)	0(0.0%)	32(0.048%)	36908470	20881278	1169831(5.496%)	10250268(48.153%)	2664330(12.516%)	2385738(11.208%)	815533(3.831%)	1799619(8.454%)
CW01	Chr05	31840960	12429503	12526790	1.55	2695286	97287	476	73450	0.936907	0	22334	0	1504	74953	22334	668(2.991%)	17389(77.859%)	4277(19.15%)	0(0.0%)	0(0.0%)	0(0.0%)	31743673	16705288	981173(5.615%)	7504836(42.946%)	2033897(11.639%)	2305478(13.193%)	823782(4.714%)	1410792(8.073%)
CW01	Chr06	33861138	17512554	17621000	1.08	2695286	108446	550	84661	0.916506	0	21800	0	1986	86646	21800	0(0.0%)	17287(79.298%)	3577(16.408%)	0(0.0%)	0(0.0%)	79(0.362%)	33752692	18622157	1065706(5.53%)	8141499(42.246%)	2303357(11.952%)	2614463(13.566%)	901703(4.679%)	1694161(8.791%)
CW01	Chr07	31813796	13506440	13628595	1.35	2695286	122155	345	55415	0.944727	0	63052	0	3689	59103	63052	0(0.0%)	47015(74.565%)	16037(25.435%)	0(0.0%)	0(0.0%)	0(0.0%)	31691641	16985851	976409(5.409%)	7438860(41.208%)	2352990(13.034%)	2313178(12.814%)	715381(3.963%)	1365497(7.564%)
CW01	Chr08	30486386	13682526	13762945	1.22	2695286	80419	481	74607	0.958541	0	5572	0	241	74847	5572	0(0.0%)	5572(100.0%)	0(0.0%)	0(0.0%)	0(0.0%)	0(0.0%)	30405967	17512159	1097344(6.144%)	7788290(43.607%)	2378537(13.317%)	2225310(12.46%)	782717(4.382%)	1625011(9.098%)
CW01	Chr09	26280973	3096086	3256995	7.44	2695286	160909	825	132953	0.98419	0	27515	0	442	133394	27515	0(0.0%)	18733(68.083%)	7602(27.629%)	0(0.0%)	0(0.0%)	1180(4.289%)	26120064	14762031	829671(5.33%)	6857985(44.06%)	2179212(14.001%)	1623599(10.431%)	652973(4.195%)	1284949(8.255%)
CW01	Chr10	27551770	9220633	9553421	1.95	2695286	332788	1524	246829	0.79202	0	68082	0	17878	264706	68082	7952(11.68%)	37015(54.368%)	13971(20.521%)	4654(6.836%)	0(0.0%)	2900(4.26%)	27218982	16441384	879814(5.122%)	7966323(46.38%)	2194440(12.776%)	1916598(11.158%)	595567(3.467%)	1392681(8.108%)
CW01	Chr11	32745461	12735245	13008456	1.55	2695286	273211	773	124875	0.779017	3372	115557	0	29408	157654	115557	0(0.0%)	90767(77.174%)	22375(19.024%)	1758(1.495%)	172(0.146%)	1849(1.572%)	32472250	19454020	1104724(5.393%)	9149338(44.666%)	2846627(13.897%)	1945499(9.498%)	725606(3.542%)	2050353(10.01%)
CW01	Chr12	28390004	12494516	12748370	1.25	2695286	253854	1541	244528	0.937922	0	8748	0	579	245106	8748	0(0.0%)	8748(100.0%)	0(0.0%)	0(0.0%)	0(0.0%)	0(0.0%)	28136150	16476651	1211236(7.218%)	7084621(42.22%)	2494400(14.865%)	1832713(10.922%)	600297(3.577%)	1753541(10.45%)
CW03	Chr01	44863847	17545660	18492920	1.5	6939952	947260	5380	832927	0.768197	7343	87831	100	19060	859335	87831	6665(7.147%)	70382(75.468%)	10646(11.415%)	3864(4.143%)	0(0.0%)	0(0.0%)	43916587	19586714	1114229(5.523%)	6514406(32.292%)	3351264(16.612%)	3324534(16.48%)	1271021(6.3%)	1512601(7.498%)
CW03	Chr02	37759109	13761692	14513861	1.69	6939952	752169	4606	716976	0.89018	0	31329	0	3865	720840	31329	0(0.0%)	25515(81.442%)	5814(18.558%)	0(0.0%)	0(0.0%)	0(0.0%)	37006940	17349134	1019923(5.719%)	6054278(33.947%)	2744756(15.39%)	2713997(15.218%)	980075(5.495%)	1642175(9.208%)
CW03	Chr03	39065984	20709046	21352765	1.17	6939952	643719	3724	574696	0.950351	0	65597	0	3427	578173	65597	0(0.0%)	49301(75.157%)	15412(23.495%)	0(0.0%)	68(0.104%)	0(0.0%)	38422265	16948484	1184188(6.775%)	6115378(34.987%)	2530852(14.479%)	2739322(15.672%)	1039318(5.946%)	1227487(7.023%)
CW03	Chr04	34667790	8842831	9232702	2.88	6939952	389871	1560	243049	0.919379	820	134986	0	11017	254885	134986	0(0.0%)	95986(71.085%)	33398(24.734%)	1564(1.158%)	506(0.375%)	0(0.0%)	34277919	18168561	1189423(6.412%)	7648304(41.234%)	2743381(14.79%)	2414400(13.017%)	747716(4.031%)	1659314(8.946%)
CW03	Chr05	30122795	11233092	11649447	1.64	6939952	416355	2092	334496	0.879966	3631	72034	0	6195	344360	72034	0(0.0%)	49988(66.863%)	19031(25.455%)	3644(4.874%)	0(0.0%)	0(0.0%)	29706440	14905497	1042297(6.678%)	5771657(36.979%)	2295481(14.707%)	2134875(13.678%)	775479(4.969%)	1245273(7.979%)
CW03	Chr06	31906303	16095252	16223142	1.03	6939952	127890	695	107202	0.927739	0	19194	0	1495	108696	19194	0(0.0%)	17243(89.835%)	1872(9.753%)	0(0.0%)	0(0.0%)	79(0.412%)	31778413	16971402	1026303(5.912%)	6997341(40.306%)	2350194(13.538%)	2302437(13.263%)	833605(4.802%)	1649034(9.499%)
CW03	Chr07	29592625	12078034	12697000	1.4	6939952	618966	3933	595345	0.939082	0	22183	0	1439	596783	22183	0(0.0%)	20850(93.991%)	1333(6.009%)	0(0.0%)	0(0.0%)	0(0.0%)	28973659	15123612	1001625(6.455%)	6115233(39.41%)	2307441(14.87%)	2178533(14.04%)	720237(4.642%)	1126476(7.26%)
CW03	Chr08	32278600	13453727	13563922	1.39	6939952	110195	639	98706	0.972498	0	11174	0	316	99021	11174	0(0.0%)	11174(99.982%)	0(0.0%)	0(0.0%)	0(0.0%)	0(0.0%)	32168405	17661436	1148545(5.839%)	8109403(41.227%)	2342477(11.909%)	2103250(10.693%)	764266(3.885%)	1593714(8.102%)
CW03	Chr09	25496688	3264011	3907697	6.61	6939952	643686	3763	617292	0.858647	0	22664	0	3731	621022	22664	0(0.0%)	11008(48.57%)	5626(24.824%)	0(0.0%)	0(0.0%)	5984(26.403%)	24853002	13845244	945119(6.668%)	5579803(39.365%)	2204862(15.555%)	1590098(11.218%)	633447(4.469%)	1285063(9.066%)
CW03	Chr10	24024225	8450129	9408982	1.73	6939952	958853	5493	909984	0.854553	0	41762	0	7108	917091	41762	0(0.0%)	19891(47.225%)	17919(42.543%)	2176(5.166%)	0(0.0%)	1410(3.348%)	23065372	12893323	877030(6.636%)	4940115(37.377%)	2057678(15.569%)	1703550(12.889%)	548617(4.151%)	1373008(10.388%)
CW03	Chr11	32048218	12509048	13393980	1.49	6939952	884932	4351	674633	0.913281	1470	192063	0	16767	692869	192063	0(0.0%)	149614(77.898%)	38312(19.948%)	745(0.388%)	172(0.09%)	2519(1.312%)	31163286	18326389	1252440(6.545%)	7797109(40.746%)	2912863(15.222%)	2126239(11.111%)	715275(3.738%)	1855756(9.698%)
CW03	Chr12	28796792	11809348	12255404	1.4	6939952	446056	1235	194539	0.817941	7196	205727	0	38595	240798	205727	0(0.0%)	170329(81.468%)	20133(9.63%)	9609(4.596%)	3991(1.909%)	420(0.201%)	28350736	15666268	1109196(6.46%)	6439567(37.505%)	2522558(14.692%)	1734940(10.105%)	591196(3.443%)	1829519(10.656%)
CW06	Chr01	45643143	17443103	18209000	1.57	3430137	765897	3328	523664	0.685073	5197	165948	0	71089	599978	165948	5107(3.067%)	118458(71.145%)	31331(18.817%)	1098(0.659%)	0(0.0%)	6575(3.949%)	44877246	20548506	1008008(4.767%)	7512262(35.526%)	3339517(15.793%)	3356265(15.872%)	1280172(6.054%)	1459113(6.9%)
CW06	Chr02	37956904	13620817	13830967	1.77	3430137	210150	1203	187115	0.943089	0	21725	0	1311	188425	21725	0(0.0%)	13314(61.284%)	8234(37.901%)	0(0.0%)	0(0.0%)	177(0.815%)	37746754	18140264	991432(5.322%)	6987036(37.509%)	2667592(14.321%)	2909915(15.622%)	1016225(5.455%)	1358289(7.292%)
CW06	Chr03	43893088	21162057	21462663	1.06	3430137	300606	1655	252150	0.944177	0	45752	0	2705	254854	45752	0(0.0%)	43023(94.035%)	2418(5.285%)	0(0.0%)	0(0.0%)	0(0.0%)	43592482	19239268	1251230(6.21%)	7586118(37.649%)	2668214(13.242%)	3038564(15.08%)	1139006(5.653%)	1168156(5.797%)
CW06	Chr04	36109252	9112873	9284557	2.94	3430137	171684	576	89855	0.966736	0	79108	0	2722	92576	79108	0(0.0%)	71173(89.967%)	7906(9.994%)	0(0.0%)	0(0.0%)	31(0.039%)	35937568	20011128	1165034(5.715%)	9215430(45.206%)	2536252(12.441%)	2367521(11.614%)	754608(3.702%)	2205189(10.817%)
CW06	Chr05	29988234	11221551	11432623	1.65	3430137	211072	1159	184937	0.890687	0	23279	0	2857	187793	23279	0(0.0%)	18280(78.526%)	4999(21.474%)	0(0.0%)	0(0.0%)	0(0.0%)	29777162	15413151	885669(5.511%)	6695432(41.661%)	2049586(12.753%)	2120915(13.197%)	810869(5.046%)	1281239(7.972%)
CW06	Chr06	33159656	16363053	16474112	1.02	3430137	111059	634	95029	0.807311	0	12942	0	3089	98117	12942	0(0.0%)	4736(36.594%)	7196(55.602%)	0(0.0%)	0(0.0%)	0(0.0%)	33048597	18085739	1036761(5.609%)	7897423(42.729%)	2301773(12.454%)	2513681(13.6%)	872166(4.719%)	1600978(8.662%)
CW06	Chr07	26887574	NA	NA	NA	3430137	NA	NA	NA	NA	NA	NA	NA	NA	NA	NA	NA	NA	NA	NA	NA	NA	26887574	14021984	0	0	0	0	0	0
CW06	Chr08	31665011	12685127	12934358	1.48	3430137	249231	401	58385	0.866616	0	165391	0	25456	83923	165391	167(0.101%)	110408(66.732%)	47028(28.424%)	1090(0.659%)	29(0.018%)	4395(2.656%)	31415780	17560056	1016716(5.371%)	8055081(42.553%)	2211182(11.681%)	2230422(11.783%)	779098(4.116%)	1642391(8.676%)
CW06	Chr09	24421581	3062272	3106950	6.96	3430137	44678	272	44679	#DIV/0!	0	0	0	0	0	0	0	0	0	0	0	0	24376903	13337365	802923(5.72%)	5805530(41.356%)	1905751(13.576%)	1607026(11.448%)	610289(4.347%)	1014011(7.223%)
CW06	Chr10	25892216	9263305	9910864	1.73	3430137	647559	3374	551438	0.906255	0	87111	0	9011	560448	87111	4024(4.602%)	59943(68.557%)	18554(21.22%)	2539(2.904%)	0(0.0%)	1418(1.622%)	25244657	14977363	835865(5.484%)	6800018(44.615%)	2092046(13.726%)	1738366(11.405%)	590062(3.871%)	1434030(9.409%)
CW06	Chr11	35877786	13460463	13722944	1.65	3430137	262481	741	117719	0.898185	1470	130024	0	13269	132549	130024	0(0.0%)	94691(72.826%)	31304(24.076%)	819(0.63%)	172(0.132%)	2041(1.57%)	35615305	21984968	1184267(5.153%)	10445721(45.449%)	3325066(14.467%)	2216025(9.642%)	830090(3.612%)	2242986(9.759%)
CW06	Chr12	28183762	12208684	12664404	1.27	3430137	455720	928	145296	0.8824	5755	273919	0	30751	181991	273919	0(0.0%)	231804(83.308%)	30232(10.865%)	8822(3.171%)	4010(1.441%)	222(0.08%)	27728042	15777405	1079904(6.508%)	6765698(40.776%)	2387674(14.39%)	1810470(10.911%)	600661(3.62%)	1664324(10.031%)
CW07	Chr01	45990030	17800691	18710913	1.53	3379895	910222	4461	703277	0.916413	0	189648	0	17298	720574	189648	8051(4.245%)	150481(79.347%)	23694(12.494%)	2622(1.383%)	0(0.0%)	3744(1.974%)	45079808	20774783	1082043(5.065%)	7365669(34.478%)	3466727(16.227%)	3487583(16.325%)	1241492(5.811%)	1597327(7.477%)
CW07	Chr02	39038516	14894038	15164883	1.6	3379895	270845	1496	234011	0.94288	0	34731	0	2104	236114	34731	0(0.0%)	20896(60.165%)	13347(38.43%)	0(0.0%)	0(0.0%)	0(0.0%)	38767671	18963806	1074200(5.524%)	7242649(37.244%)	2851551(14.664%)	2976294(15.305%)	1011463(5.201%)	1503680(7.732%)
CW07	Chr03	41558473	22090156	22450654	1.16	3379895	360498	2141	330328	0.962282	0	29033	0	1138	331465	29033	0(0.0%)	29033(100.0%)	0(0.0%)	0(0.0%)	0(0.0%)	0(0.0%)	41197975	19486932	1280823(6.327%)	8356772(41.283%)	2535806(12.527%)	2964457(14.645%)	1047483(5.175%)	1142602(5.645%)
CW07	Chr04	36269282	9807759	9963876	2.68	3379895	156117	551	86912	0.932621	0	64543	0	4663	91574	64543	0(0.0%)	56788(87.985%)	7723(11.966%)	0(0.0%)	0(0.0%)	32(0.05%)	36113165	19961449	1223265(6.013%)	9235153(45.396%)	2968974(14.594%)	2269811(11.157%)	778344(3.826%)	1722544(8.467%)
CW07	Chr05	34701199	12525744	12672566	1.76	3379895	146822	788	121742	0.93202	0	23376	0	1705	123446	23376	668(2.858%)	18431(78.846%)	4277(18.297%)	0(0.0%)	0(0.0%)	0(0.0%)	34554377	17160402	1129058(5.757%)	7674350(39.132%)	2170994(11.07%)	2350283(11.984%)	817941(4.171%)	1341620(6.841%)
CW07	Chr06	34105225	17739835	17868564	1.09	3379895	128729	660	100792	0.915778	0	25585	0	2353	103144	25585	0(0.0%)	17296(67.602%)	2720(10.631%)	0(0.0%)	0(0.0%)	79(0.309%)	33976496	18231527	1123163(5.783%)	7739099(39.849%)	2305690(11.872%)	2553256(13.147%)	834359(4.296%)	1781720(9.174%)
CW07	Chr07	32035133	13521121	13715862	1.35	3379895	194741	435	70160	0.960018	0	119601	0	4981	75140	119601	0(0.0%)	88112(73.672%)	31489(26.328%)	0(0.0%)	0(0.0%)	0(0.0%)	31840392	17294487	1058427(5.772%)	7960124(43.411%)	2315765(12.629%)	2208546(12.045%)	720076(3.927%)	1275072(6.954%)
CW07	Chr08	32015571	13660087	13753844	1.34	3379895	93757	548	84218	0.972117	0	9274	0	266	84483	9274	0(0.0%)	7626(82.23%)	1035(11.16%)	0(0.0%)	0(0.0%)	0(0.0%)	31921814	17933443	1078464(5.68%)	8177853(43.068%)	2367908(12.47%)	2141702(11.279%)	806265(4.246%)	1684463(8.871%)
CW07	Chr09	25404073	2916534	3124313	7.64	3379895	207779	1098	178301	0.979104	0	28863	0	616	178916	28863	0(0.0%)	21406(74.164%)	3609(12.504%)	0(0.0%)	0(0.0%)	3848(13.332%)	25196294	13846804	812536(5.46%)	6220267(41.798%)	1915559(12.872%)	1631902(10.966%)	627057(4.214%)	1345385(9.041%)
CW07	Chr10	25371888	8713114	9080000	1.87	3379895	366886	2038	331463	0.956357	0	33878	100	1446	333008	33878	0(0.0%)	31503(92.99%)	0(0.0%)	140(0.413%)	0(0.0%)	0(0.0%)	25005002	14097333	957130(6.477%)	5876792(39.768%)	2154453(14.579%)	1712450(11.588%)	601047(4.067%)	1354908(9.169%)
CW07	Chr11	33660219	12665459	12925098	1.64	3379895	259639	761	123183	0.747122	3372	101950	0	31135	157733	101950	0(0.0%)	77133(74.253%)	22228(21.398%)	1692(1.629%)	172(0.166%)	1859(1.79%)	33400580	19885553	1116921(5.249%)	9184036(43.161%)	2930998(13.775%)	2102415(9.881%)	774979(3.642%)	2113308(9.932%)
CW07	Chr12	29275438	12755027	13038887	1.27	3379895	283860	1797	283741	0	0	0	0	120	0	0	0	0	0	0	0	0	28991578	16680791	1125819(6.422%)	7128421(40.66%)	2579736(14.715%)	1902857(10.854%)	592404(3.379%)	1823898(10.403%)
CW09	Chr01	45126944	17518574	17637797	1.57	2364030	119223	693	108653	0.886293	0	9369	0	1202	109854	9369	0(0.0%)	6822(72.815%)	0(0.0%)	1297(13.844%)	0(0.0%)	0(0.0%)	45007721	20720085	1039801(4.883%)	7744807(36.37%)	3280143(15.404%)	3451463(16.208%)	1226900(5.762%)	1463955(6.875%)
CW09	Chr02	37777978	14037569	14136185	1.68	2364030	98616	589	92493	0.950359	0	5820	0	304	92796	5820	0(0.0%)	5820(100.0%)	0(0.0%)	0(0.0%)	0(0.0%)	0(0.0%)	37679362	18046925	920017(4.956%)	6886253(37.092%)	2737347(14.744%)	2805940(15.114%)	1009672(5.438%)	1438360(7.748%)
CW09	Chr03	41116346	22488009	22930498	1.24	2364030	442489	2664	411594	0.970741	0	29992	0	904	412497	29992	0(0.0%)	29992(100.0%)	0(0.0%)	0(0.0%)	0(0.0%)	0(0.0%)	40673857	17682342	1144188(6.171%)	6256322(33.74%)	2581475(13.922%)	3035629(16.371%)	1189249(6.414%)	1163187(6.273%)
CW09	Chr04	36974879	9980692	10151868	2.69	2364030	171176	580	90280	0.971964	0	78629	0	2268	92547	78629	0(0.0%)	70697(89.91%)	7903(10.051%)	0(0.0%)	0(0.0%)	31(0.039%)	36803703	20576285	1191987(5.682%)	9562287(45.578%)	2684706(12.797%)	2486744(11.853%)	767265(3.657%)	2103935(10.028%)
CW09	Chr05	30768739	12535085	12618643	1.45	2364030	83558	533	83030	0.882798	0	467	0	62	83091	467	0(0.0%)	467(100.0%)	0(0.0%)	0(0.0%)	0(0.0%)	0(0.0%)	30685181	16206618	1016106(6.128%)	7041220(42.463%)	2129051(12.84%)	2180302(13.149%)	819402(4.942%)	1319554(7.958%)
CW09	Chr06	34700384	16677258	16728846	1.08	2364030	51588	234	36167	0.969654	0	14954	0	468	36634	14954	0(0.0%)	6897(46.121%)	6949(46.469%)	0(0.0%)	0(0.0%)	0(0.0%)	34648796	19232392	1236213(6.276%)	8518598(43.247%)	2494251(12.663%)	2501108(12.698%)	874885(4.442%)	1698535(8.623%)
CW09	Chr07	32665973	13045697	13166244	1.49	2364030	120547	215	34329	0.965506	0	83245	0	2974	37302	83245	0(0.0%)	82220(98.766%)	2(0.002%)	0(0.0%)	0(0.0%)	564(0.678%)	32545426	16733927	939763(4.963%)	7392791(39.044%)	2350346(12.413%)	2255016(11.909%)	746493(3.942%)	1297398(6.852%)
CW09	Chr08	31653901	15388059	15520589	1.05	2364030	132530	381	58494	0.912233	0	67539	0	6498	64991	67539	0(0.0%)	43973(65.108%)	22953(33.985%)	0(0.0%)	0(0.0%)	0(0.0%)	31521371	18451437	1002112(5.327%)	8857351(47.085%)	2306611(12.262%)	2220422(11.804%)	792587(4.213%)	1608851(8.553%)
CW09	Chr09	25486133	3331086	3533805	6.59	2364030	202719	444	71716	0.848486	6089	111155	0	13760	91615	111155	8296(7.137%)	81988(70.534%)	17954(15.446%)	2255(1.94%)	428(0.368%)	1215(1.045%)	25283414	14209055	777830(5.216%)	6426679(43.097%)	1860898(12.479%)	1679564(11.263%)	650072(4.359%)	1174218(7.874%)
CW09	Chr10	28728342	9615367	9816999	1.97	2364030	201632	835	136148	0.782408	1127	51236	0	13122	150580	51236	3739(7.298%)	30843(60.198%)	12312(24.03%)	2007(3.917%)	0(0.0%)	1419(2.77%)	28526710	17594924	947828(5.157%)	9006688(49.002%)	2252852(12.257%)	1846725(10.047%)	593341(3.228%)	1439878(7.834%)
CW09	Chr11	36938080	14808595	15116453	1.47	2364030	307858	604	96258	0.564047	3136	119353	0	89112	188597	119353	0(0.0%)	88040(72.043%)	29027(23.753%)	2267(1.855%)	172(0.141%)	2123(1.737%)	36630222	23110946	1296344(5.44%)	11060233(46.416%)	3361401(14.107%)	2398917(10.068%)	814733(3.419%)	2413196(10.127%)
CW09	Chr12	28516109	11754104	12186198	1.39	2364030	432094	769	120814	0.822482	10170	256023	0	45088	176250	256023	0(0.0%)	217094(81.017%)	30871(11.521%)	9238(3.448%)	5705(2.129%)	469(0.175%)	28084015	16201434	1018394(5.915%)	7398149(42.969%)	2316280(13.453%)	1738543(10.098%)	575630(3.343%)	1709391(9.928%)
CW11	Chr01	45084654	17450634	17569863	1.58	2369485	119229	692	108539	0.86961	0	9297	0	1394	109932	9297	0(0.0%)	6798(72.745%)	0(0.0%)	1297(13.879%)	0(0.0%)	0(0.0%)	44965425	20609732	1027869(4.853%)	7589462(35.832%)	3308728(15.622%)	3445891(16.269%)	1233398(5.823%)	1467096(6.927%)
CW11	Chr02	37871644	14063442	14185822	1.68	2369485	122380	614	96721	0.96703	0	24814	0	846	97566	24814	0(0.0%)	9960(40.139%)	14854(59.861%)	0(0.0%)	0(0.0%)	0(0.0%)	37749264	18152894	898375(4.816%)	7111189(38.12%)	2674026(14.334%)	2797150(14.994%)	1017325(5.453%)	1421850(7.622%)
CW11	Chr03	39135575	20491362	20941580	1.13	2369485	450218	2712	419014	0.962154	0	30024	0	1181	420194	30024	0(0.0%)	30024(100.0%)	0(0.0%)	0(0.0%)	0(0.0%)	0(0.0%)	38685357	17024738	1180294(6.608%)	6087453(34.082%)	2473026(13.846%)	2876080(16.102%)	1127266(6.311%)	1089425(6.099%)
CW11	Chr04	36928103	9971404	10142898	2.69	2369485	171494	568	88492	0.946363	0	78551	0	4452	92943	78551	0(0.0%)	70619(89.9%)	7903(10.061%)	0(0.0%)	0(0.0%)	31(0.039%)	36756609	20548994	1197112(5.716%)	9553952(45.621%)	2669338(12.746%)	2461300(11.753%)	769205(3.673%)	2107924(10.066%)
CW11	Chr05	30759822	12537002	12620703	1.45	2369485	83701	533	83109	0.779089	0	462	0	131	83239	462	0(0.0%)	462(100.0%)	0(0.0%)	0(0.0%)	0(0.0%)	0(0.0%)	30676121	16192323	1015936(6.131%)	7029639(42.426%)	2131318(12.863%)	2181738(13.167%)	817780(4.936%)	1314732(7.935%)
CW11	Chr06	32691738	15862355	15983897	1.05	2369485	121542	653	97195	0.887383	0	21606	0	2742	99936	21606	0(0.0%)	13435(62.182%)	7161(33.144%)	0(0.0%)	0(0.0%)	0(0.0%)	32570196	17576880	1114728(6.167%)	7471089(41.333%)	2306047(12.758%)	2406138(13.312%)	848348(4.693%)	1582977(8.758%)
CW11	Chr07	32660207	13058129	13178551	1.49	2369485	120422	198	31767	0.938267	0	83183	0	5473	37239	83183	0(0.0%)	82158(98.765%)	2(0.002%)	0(0.0%)	0(0.0%)	564(0.678%)	32539785	16738833	940694(4.967%)	7392978(39.032%)	2348759(12.401%)	2260077(11.932%)	749708(3.958%)	1296985(6.848%)
CW11	Chr08	31671880	15411282	15543811	1.05	2369485	132529	400	61459	0.949937	0	67513	0	3558	65016	67513	0(0.0%)	43954(65.104%)	22946(33.988%)	0(0.0%)	0(0.0%)	0(0.0%)	31539351	18484167	994938(5.283%)	8918502(47.353%)	2304249(12.235%)	2211477(11.742%)	793870(4.215%)	1606100(8.528%)
CW11	Chr09	26174738	3389048	3456000	6.7	2369485	66952	412	66724	0	0	0	0	229	0	0	0	0	0	0	0	0	26107786	14795225	800474(5.115%)	6799157(43.45%)	1937417(12.381%)	1734833(11.086%)	659432(4.214%)	1227826(7.846%)
CW11	Chr10	28342282	9668897	9870675	1.91	2369485	201778	876	142470	0.863882	1127	51236	0	6946	150726	51236	3739(7.298%)	30843(60.198%)	12312(24.03%)	2007(3.917%)	0(0.0%)	1419(2.77%)	28140504	17312785	939075(5.19%)	8704361(48.109%)	2323107(12.84%)	1836688(10.151%)	591351(3.268%)	1425781(7.88%)
CW11	Chr11	38009836	16625397	16972537	1.27	2369485	347140	940	147985	0.912641	1470	181758	0	15928	165480	181758	0(0.0%)	139644(76.83%)	38041(20.929%)	820(0.451%)	172(0.095%)	1680(0.924%)	37662696	24045291	1264363(5.107%)	11905116(48.089%)	3350313(13.533%)	2450935(9.9%)	810426(3.274%)	2499716(10.097%)
CW11	Chr12	28305793	11556065	11988165	1.41	2369485	432100	765	120234	0.820895	10171	256010	0	45686	176256	256010	0(0.0%)	217104(81.002%)	31192(11.638%)	9066(3.383%)	5706(2.129%)	469(0.175%)	27873693	15988176	1026074(6.034%)	7212130(42.413%)	2299077(13.52%)	1786218(10.504%)	577537(3.396%)	1660605(9.766%)
CW13	Chr01	47530083	19349079	19805987	1.43	3029321	456908	1577	249349	0.783234	852	162568	0	44140	294340	162568	8051(4.952%)	135401(83.288%)	10329(6.354%)	3144(1.934%)	0(0.0%)	3969(2.441%)	47073175	22588294	1144941(4.938%)	8719996(37.611%)	3434753(14.815%)	3691105(15.921%)	1312267(5.66%)	1667322(7.192%)
CW13	Chr02	38944785	14153491	14463906	1.73	3029321	310415	1623	253217	0.636987	0	36435	0	20764	273980	36435	0(0.0%)	22599(62.026%)	13348(36.635%)	0(0.0%)	0(0.0%)	0(0.0%)	38634370	18923539	1090129(5.62%)	7841080(40.421%)	2681942(13.825%)	2706042(13.95%)	992387(5.116%)	1362388(7.023%)
CW13	Chr03	41906676	23141782	23188445	1.24	3029321	46663	284	43735	0.870604	0	2550	0	379	44113	2550	0(0.0%)	0(0.0%)	0(0.0%)	0(0.0%)	0(0.0%)	0(0.0%)	41860013	19885592	1107256(5.418%)	8662571(42.388%)	2537257(12.415%)	2955375(14.461%)	1077828(5.274%)	1327083(6.494%)
CW13	Chr04	37996516	9702470	9847956	2.9	3029321	145486	425	66348	0.944705	0	74763	0	4376	70723	74763	0(0.0%)	66831(89.388%)	7903(10.57%)	0(0.0%)	0(0.0%)	31(0.041%)	37851030	21540081	1109280(5.056%)	10299362(46.943%)	2770864(12.629%)	2534304(11.551%)	773282(3.525%)	2223915(10.136%)
CW13	Chr05	33668208	11257694	11663865	1.95	3029321	406171	1442	227734	0.306762	0	54738	0	123700	351433	54738	969(1.77%)	44144(80.646%)	7532(13.76%)	1160(2.119%)	493(0.901%)	310(0.566%)	33262037	17161792	1040324(5.446%)	7927837(41.503%)	2078436(10.881%)	2247014(11.763%)	829643(4.343%)	1395405(7.305%)
CW13	Chr06	33578024	17322359	17363281	1.07	3029321	40922	177	27456	0.905101	0	12189	0	1278	28733	12189	0(0.0%)	3887(31.889%)	7187(58.963%)	0(0.0%)	0(0.0%)	0(0.0%)	33537102	18223476	1007203(5.297%)	8038849(42.276%)	2261631(11.894%)	2540107(13.358%)	857300(4.509%)	1635485(8.601%)
CW13	Chr07	30593117	13153663	13398264	1.31	3029321	244601	373	60100	0.8887	1046	163967	100	19389	80716	163967	473(0.288%)	134438(81.976%)	26368(16.078%)	2509(1.53%)	0(0.0%)	127(0.077%)	30348516	16267917	1022739(6.154%)	7029399(42.299%)	2275976(13.695%)	2296661(13.82%)	734457(4.42%)	1154664(6.948%)
CW13	Chr08	30987758	12971249	13127289	1.38	3029321	156040	480	73892	0.806571	414	66259	0	15476	89864	66259	167(0.251%)	54018(81.07%)	5837(8.76%)	1092(1.639%)	492(0.738%)	3402(5.106%)	30831718	17437538	970762(5.278%)	7855791(42.71%)	2444091(13.288%)	2121158(11.532%)	767452(4.172%)	1642996(8.933%)
CW13	Chr09	27201940	3166729	3472398	7.49	3029321	305669	1408	228804	0.974683	0	74920	0	1946	230749	74920	0(0.0%)	52948(70.673%)	17845(23.819%)	4(0.005%)	0(0.0%)	3725(4.972%)	26896271	15263739	812183(4.984%)	7372882(45.247%)	2021488(12.406%)	1757247(10.784%)	668518(4.103%)	1294348(7.943%)
CW13	Chr10	28016469	10838548	11138924	1.56	3029321	300376	1035	168446	0.783394	4668	103354	0	23909	197206	103354	4949(4.683%)	64061(60.613%)	20731(19.615%)	8099(7.663%)	1897(1.795%)	2959(2.8%)	27716093	16604025	919332(5.302%)	8437488(48.662%)	2036240(11.744%)	1761841(10.161%)	559153(3.225%)	1418505(8.181%)
CW13	Chr11	35530606	13372052	13823866	1.62	3029321	451814	2136	342805	0.830988	3136	90586	0	15288	361228	90586	0(0.0%)	77693(83.149%)	11169(11.953%)	2202(2.357%)	172(0.184%)	2030(2.173%)	35078792	21804868	1196327(5.31%)	10411436(46.209%)	3289973(14.602%)	2170391(9.633%)	767591(3.407%)	2252798(9.999%)
CW13	Chr12	28702485	12764279	12928535	1.24	3029321	164256	788	122118	0.921522	0	38832	0	3307	125424	38832	0(0.0%)	38832(100.0%)	0(0.0%)	0(0.0%)	0(0.0%)	0(0.0%)	28538229	16938067	1209689(7.015%)	7382947(42.817%)	2625670(15.227%)	1857999(10.775%)	581986(3.375%)	1805038(10.468%)
CW14	Chr01	45697906	18383125	18884740	1.46	3114800	501615	1788	281867	0.65613	0	144184	0	75565	357431	144184	8051(5.584%)	120123(83.311%)	9141(6.34%)	2287(1.586%)	0(0.0%)	3596(2.494%)	45196291	20967642	1091016(5.062%)	7643449(35.46%)	3269464(15.168%)	3536076(16.405%)	1251718(5.807%)	1642955(7.622%)
CW14	Chr02	38781809	14892423	15090936	1.59	3114800	198513	1020	158620	0.892891	0	35621	0	4273	162892	35621	0(0.0%)	22051(61.904%)	13082(36.726%)	0(0.0%)	0(0.0%)	0(0.0%)	38583296	18574905	1082064(5.575%)	7360846(37.926%)	2731788(14.075%)	2737358(14.104%)	1014968(5.23%)	1452846(7.486%)
CW14	Chr03	42473899	22196034	22444534	1.11	3114800	248500	1579	242958	0.93361	0	5175	0	368	243325	5175	0(0.0%)	5175(100.0%)	0(0.0%)	0(0.0%)	0(0.0%)	0(0.0%)	42225399	20045486	1231029(5.874%)	8912824(42.531%)	2523000(12.039%)	2903941(13.857%)	1080312(5.155%)	1213889(5.792%)
CW14	Chr04	44312181	9549697	9904323	3.6	3114800	354626	1020	163008	0.816026	4506	156366	0	30747	198288	156366	1371(0.858%)	117267(73.385%)	25747(16.112%)	11193(7.005%)	458(0.287%)	439(0.275%)	43957555	26634696	1459553(5.399%)	13822924(51.131%)	3222733(11.921%)	2652658(9.812%)	836649(3.095%)	2679730(9.912%)
CW14	Chr05	32603163	13113737	13238703	1.48	3114800	124966	708	109362	0.923806	0	14416	0	1189	110550	14416	668(4.634%)	13748(95.366%)	0(0.0%)	0(0.0%)	0(0.0%)	0(0.0%)	32478197	16939817	1033326(5.804%)	7733066(43.434%)	2165919(12.165%)	2220731(12.473%)	798403(4.484%)	1351924(7.593%)
CW14	Chr06	35261762	18069832	18258231	1.06	3114800	188399	1063	163356	0.893787	0	22384	0	2660	166015	22384	0(0.0%)	14525(64.89%)	3205(14.318%)	0(0.0%)	0(0.0%)	79(0.353%)	35073363	19501800	1060124(5.156%)	9083259(44.175%)	2386619(11.607%)	2594597(12.618%)	832954(4.051%)	1652509(8.037%)
CW14	Chr07	32098799	13127584	13612350	1.41	3114800	484766	3048	471427	0.923013	0	12313	0	1027	472453	12313	0(0.0%)	11466(93.121%)	847(6.879%)	0(0.0%)	0(0.0%)	0(0.0%)	31614033	16964610	1126269(6.275%)	7490339(41.735%)	2417929(13.472%)	2189554(12.2%)	740113(4.124%)	1245086(6.937%)
CW14	Chr08	30729960	13840067	13934499	1.21	3114800	94432	36	4557	0.827206	415	74346	0	15115	20128	74346	138(0.185%)	47883(64.08%)	19858(26.575%)	1307(1.749%)	161(0.215%)	4250(5.688%)	30635528	17547587	1025784(5.663%)	7923069(43.738%)	2338435(12.909%)	2204615(12.17%)	783885(4.327%)	1629184(8.994%)
CW14	Chr09	25988582	3076338	3323850	7.37	3114800	247512	1276	203555	0.969084	0	42599	0	1359	204913	42599	0(0.0%)	30183(70.854%)	12416(29.146%)	0(0.0%)	0(0.0%)	0(0.0%)	25741070	14302796	863150(5.681%)	6354445(41.822%)	2243425(14.765%)	1638591(10.785%)	644837(4.244%)	1219253(8.025%)
CW14	Chr10	26108094	9107638	9579349	1.81	3114800	471711	2498	405550	0.900396	0	59572	0	6590	412139	59572	4024(6.755%)	41628(69.878%)	9260(15.544%)	2284(3.834%)	0(0.0%)	1418(2.38%)	25636383	15204493	957281(6.066%)	6636047(42.048%)	2224294(14.094%)	1857039(11.767%)	575998(3.65%)	1474351(9.342%)
CW14	Chr11	35591852	13566090	13593975	1.62	3114800	27885	89	14067	0.930748	0	12862	0	957	15071	12862	0(0.0%)	11436(88.913%)	0(0.0%)	1378(10.714%)	0(0.0%)	0(0.0%)	35563967	21937991	1238869(5.384%)	10217817(44.404%)	3236236(14.064%)	2320956(10.086%)	819592(3.562%)	2344928(10.19%)
CW14	Chr12	28697381	12132854	12304729	1.35	3114800	171875	1033	163947	0.974902	0	7730	0	199	164145	7730	0(0.0%)	0(0.0%)	7730(100.0%)	0(0.0%)	0(0.0%)	0(0.0%)	28525506	16375422	1199020(6.952%)	7008619(40.639%)	2521363(14.62%)	1813364(10.515%)	590603(3.425%)	1790801(10.384%)
CW15	Chr01	47033559	18356684	18885175	1.53	2353295	528491	1842	290227	0.672864	852	160320	0	77093	368171	160320	8051(5.022%)	134822(84.095%)	10049(6.268%)	2598(1.62%)	0(0.0%)	3744(2.335%)	46505068	22274143	1202357(5.258%)	8631892(37.745%)	3298924(14.425%)	3673884(16.065%)	1268135(5.545%)	1632184(7.137%)
CW15	Chr02	38397605	14231093	14463953	1.68	2353295	232860	1268	197894	0.881031	0	30807	0	4160	202053	30807	0(0.0%)	17893(58.081%)	12426(40.335%)	0(0.0%)	0(0.0%)	0(0.0%)	38164745	18509328	1095481(5.767%)	7146008(37.619%)	2774114(14.604%)	2794275(14.71%)	1011635(5.326%)	1481228(7.798%)
CW15	Chr03	41462074	22262765	22381379	1.17	2353295	118614	619	95724	0.974663	0	22311	0	580	96303	22311	0(0.0%)	14387(64.484%)	0(0.0%)	0(0.0%)	0(0.0%)	0(0.0%)	41343460	19502056	1085295(5.316%)	8648754(42.361%)	2569500(12.585%)	2818818(13.806%)	1074487(5.263%)	1176524(5.763%)
CW15	Chr04	39549300	10402890	10587884	2.78	2353295	184994	643	100978	0.948225	0	79667	0	4350	105327	79667	0(0.0%)	71741(90.049%)	7897(9.912%)	0(0.0%)	0(0.0%)	31(0.039%)	39364306	23053228	1214626(5.183%)	11468123(48.933%)	2783153(11.875%)	2452279(10.464%)	785172(3.35%)	2551712(10.888%)
CW15	Chr05	33207625	13845613	13986961	1.39	2353295	141348	762	118017	0.942482	0	21990	0	1342	119358	21990	668(3.038%)	17365(78.968%)	3957(17.995%)	0(0.0%)	0(0.0%)	0(0.0%)	33066277	17435410	1034000(5.651%)	8181743(44.717%)	2177341(11.9%)	2218544(12.125%)	816455(4.462%)	1359201(7.429%)
CW15	Chr06	35294173	18403363	18551847	1.1	2353295	148484	679	103774	0.934334	0	41775	0	2936	106709	41775	0(0.0%)	34882(83.5%)	3459(8.28%)	0(0.0%)	0(0.0%)	79(0.189%)	35145689	19654932	1060769(5.118%)	9277256(44.757%)	2332484(11.253%)	2521168(12.163%)	855339(4.126%)	1747510(8.431%)
CW15	Chr07	32545713	12834108	12945431	1.53	2353295	111323	145	23252	0.914002	0	80498	0	7574	30825	80498	0(0.0%)	79470(98.72%)	2(0.002%)	0(0.0%)	0(0.0%)	567(0.704%)	32434390	17867213	1040736(5.522%)	8267225(43.861%)	2414012(12.807%)	2287945(12.139%)	740629(3.929%)	1381154(7.328%)
CW15	Chr08	30968252	14443209	14447705	1.14	2353295	4496	29	4497	#DIV/0!	0	0	0	0	0	0	0	0	0	0	0	0	30963756	18015490	1002065(5.456%)	8296889(45.178%)	2345970(12.774%)	2208750(12.027%)	802533(4.37%)	1721577(9.374%)
CW15	Chr09	25046112	3171001	3354926	6.84	2353295	183925	931	149256	0.96683	0	33520	0	1150	150405	33520	0(0.0%)	24713(73.726%)	8807(26.274%)	0(0.0%)	0(0.0%)	0(0.0%)	24862187	13875063	893954(6.21%)	6018771(41.813%)	2222944(15.443%)	1606245(11.159%)	625007(4.342%)	1219880(8.475%)
CW15	Chr10	26918519	561725	861317	46.39	2353295	299592	1736	286483	0.917086	0	12023	0	1087	287569	12023	0(0.0%)	4412(36.696%)	7611(63.304%)	0(0.0%)	0(0.0%)	0(0.0%)	26618927	16008283	980352(5.916%)	7584726(45.767%)	2185423(13.187%)	1838481(11.094%)	561798(3.39%)	1383840(8.35%)
CW15	Chr11	33713783	15304243	15585897	1.18	2353295	281654	780	124053	0.89778	1470	141492	0	14640	140136	141492	0(0.0%)	106241(75.072%)	31324(22.134%)	821(0.58%)	172(0.122%)	1777(1.256%)	33432129	20272071	1211776(5.829%)	8893010(42.778%)	3080792(14.819%)	2324000(11.179%)	766968(3.689%)	2252258(10.834%)
CW15	Chr12	30294084	11816193	11933707	1.55	2353295	117514	156	25074	0.861977	0	79682	0	12759	37832	79682	0(0.0%)	67815(85.107%)	4289(5.383%)	4565(5.729%)	2471(3.101%)	64(0.08%)	30176570	17674992	1184860(6.218%)	8270902(43.406%)	2539354(13.327%)	1836766(9.639%)	585944(3.075%)	1819929(9.551%)
CW18	Chr01	50397478	19813075	20337906	1.52	3925995	524831	1823	287815	0.762334	0	180686	0	56331	344145	180686	8055(4.458%)	148358(82.108%)	16872(9.338%)	2597(1.437%)	0(0.0%)	3746(2.073%)	49872647	23596940	1192406(4.919%)	8989884(37.083%)	3622130(14.941%)	3819154(15.754%)	1327596(5.476%)	1844452(7.608%)
CW18	Chr02	47474350	17765932	18011929	1.66	3925995	245997	1198	186821	0.909543	0	53824	0	5353	192173	53824	0(0.0%)	42404(78.783%)	10932(20.311%)	0(0.0%)	0(0.0%)	0(0.0%)	47228353	22846184	1310988(5.505%)	9004016(37.81%)	3403284(14.291%)	3460104(14.53%)	1209132(5.077%)	1722912(7.235%)
CW18	Chr03	44184760	22488254	22620872	1.04	3925995	132618	709	109650	0.970787	0	22298	0	671	110320	22298	0(0.0%)	14398(64.571%)	0(0.0%)	0(0.0%)	0(0.0%)	0(0.0%)	44052142	20500635	1199514(5.691%)	8378490(39.748%)	2779641(13.187%)	3178126(15.077%)	1180016(5.598%)	1418068(6.727%)
CW18	Chr04	39169667	10651277	10855464	2.66	3925995	204187	330	52249	0.603973	0	91767	0	60172	112420	91767	0(0.0%)	80083(87.266%)	7047(7.679%)	3609(3.933%)	255(0.278%)	64(0.07%)	38965480	21715800	1259966(5.693%)	10564871(47.735%)	2676519(12.093%)	2508137(11.332%)	827157(3.737%)	2009165(9.078%)
CW18	Chr05	36547807	13978007	14110939	1.61	3925995	132932	755	116983	0.905768	0	14447	0	1503	118485	14447	668(4.624%)	13779(95.376%)	0(0.0%)	0(0.0%)	0(0.0%)	0(0.0%)	36414875	19158885	1111540(5.506%)	8841918(43.801%)	2357433(11.678%)	2487859(12.324%)	910414(4.51%)	1623122(8.041%)
CW18	Chr06	35869901	16890306	17000145	1.12	3925995	109839	561	86023	0.920561	0	21925	0	1892	87914	21925	0(0.0%)	17280(78.814%)	2736(12.479%)	0(0.0%)	0(0.0%)	79(0.36%)	35760062	19640932	1159890(5.73%)	8276307(40.884%)	2542117(12.558%)	2775199(13.709%)	888883(4.391%)	1964803(9.706%)
CW18	Chr07	37889837	17814255	17994000	1.12	3925995	179745	360	57970	0.958005	0	116662	0	5114	63083	116662	0(0.0%)	85175(73.01%)	31487(26.99%)	0(0.0%)	0(0.0%)	0(0.0%)	37710092	20983960	1161559(5.179%)	9933435(44.287%)	2756699(12.291%)	2550259(11.37%)	811677(3.619%)	1756944(7.833%)
CW18	Chr08	33796433	15672760	15984931	1.14	3925995	312171	1123	171649	0.815205	0	114555	0	25968	197699	114555	167(0.146%)	84198(73.463%)	23089(20.145%)	1095(0.955%)	29(0.025%)	4248(3.706%)	33484262	18850814	1068684(5.388%)	8349711(42.095%)	2726253(13.744%)	2294857(11.569%)	826782(4.168%)	1804878(9.099%)
CW18	Chr09	27076500	2869423	3076562	8.36	3925995	207139	1089	176653	0.982452	0	29952	0	535	177187	29952	0(0.0%)	22495(75.103%)	3609(12.049%)	0(0.0%)	0(0.0%)	3848(12.847%)	26869361	14631861	867749(5.634%)	6261161(40.651%)	2119430(13.761%)	1779897(11.556%)	706377(4.586%)	1426215(9.26%)
CW18	Chr10	31881615	11360140	11708886	1.78	3925995	348746	1856	305489	0.79546	384	34410	0	8464	314380	34410	1259(3.659%)	23795(69.151%)	2301(6.687%)	2321(6.745%)	0(0.0%)	1420(4.127%)	31532869	18591425	1161939(5.865%)	8211352(41.446%)	2553303(12.888%)	2284575(11.531%)	717554(3.622%)	1869947(9.438%)
CW18	Chr11	37554121	15743077	15898733	1.38	3925995	155656	748	120805	0.621485	0	21660	0	13192	133996	21660	0(0.0%)	18001(83.107%)	3659(16.893%)	0(0.0%)	0(0.0%)	0(0.0%)	37398465	21953503	1335294(5.778%)	9518207(41.188%)	3374616(14.603%)	2448326(10.595%)	905655(3.919%)	2432754(10.527%)
CW18	Chr12	33030024	13779477	15151611	1.3	3925995	1372134	3589	568881	0.830355	12240	666986	100	123928	705939	666986	10410(1.548%)	530697(78.919%)	59438(8.839%)	41114(6.114%)	9321(1.386%)	4408(0.656%)	31657890	18752202	1270856(6.473%)	8123005(41.373%)	2895730(14.749%)	1930184(9.831%)	675287(3.439%)	2187484(11.142%)
CW22	Chr01	51662894	17873425	18382707	1.86	3541146	509282	2005	317958	0.919221	852	175870	0	14603	333412	175870	8051(4.578%)	143540(81.616%)	16874(9.594%)	2605(1.481%)	0(0.0%)	3744(2.129%)	51153612	23608545	1186272(4.89%)	8863435(36.533%)	3699953(15.25%)	3883677(16.008%)	1431209(5.899%)	1734525(7.149%)
CW22	Chr02	39103417	15036223	15401875	1.58	3541146	365652	2021	316468	0.954742	0	46959	0	2226	318693	46959	0(0.0%)	33137(70.566%)	13334(28.395%)	0(0.0%)	0(0.0%)	0(0.0%)	38737765	18639837	1065867(5.465%)	7136790(36.589%)	2782960(14.268%)	2886477(14.798%)	1017717(5.218%)	1492367(7.651%)
CW22	Chr03	36461101	21944180	22020525	1.52	3541146	76345	372	57466	0.97696	0	18445	0	435	57900	18445	0(0.0%)	10545(57.17%)	0(0.0%)	0(0.0%)	0(0.0%)	0(0.0%)	36384756	16451769	883072(5.12%)	7071000(41.0%)	2169855(12.582%)	2462191(14.277%)	946358(5.487%)	1005394(5.83%)
CW22	Chr04	36169192	9438406	9555391	2.82	3541146	116985	336	52552	0.925536	0	59636	0	4798	57349	59636	0(0.0%)	42409(71.113%)	17195(28.833%)	0(0.0%)	0(0.0%)	32(0.054%)	36052207	20047619	1214804(5.949%)	9413102(46.099%)	2578822(12.629%)	2404031(11.773%)	783334(3.836%)	1887961(9.246%)
CW22	Chr05	30041458	12341010	12490924	1.42	3541146	149914	901	142167	0.874806	0	6778	0	970	143136	6778	0(0.0%)	6778(100.0%)	0(0.0%)	0(0.0%)	0(0.0%)	0(0.0%)	29891544	15492485	1061473(6.692%)	6613175(41.689%)	2051125(12.93%)	2117570(13.349%)	808757(5.098%)	1264873(7.974%)
CW22	Chr06	34300696	16968030	17096840	1.01	3541146	128810	701	98817	0.862939	0	25883	0	4111	102927	25883	0(0.0%)	18591(71.827%)	6283(24.275%)	0(0.0%)	0(0.0%)	0(0.0%)	34171886	18823589	1080378(5.506%)	8306900(42.336%)	2445656(12.464%)	2568357(13.09%)	847421(4.319%)	1698619(8.657%)
CW22	Chr07	32773149	13510101	13701326	1.41	3541146	191225	413	66695	0.960684	0	119635	0	4896	71590	119635	0(0.0%)	88145(73.678%)	31490(26.322%)	0(0.0%)	0(0.0%)	0(0.0%)	32581924	17898749	1021090(5.409%)	8343714(44.201%)	2424521(12.844%)	2261914(11.982%)	704483(3.732%)	1367464(7.244%)
CW22	Chr08	28611641	12326594	12415416	1.31	3541146	88822	515	79438	0.984976	0	9244	0	141	79578	9244	0(0.0%)	7627(82.508%)	1004(10.861%)	0(0.0%)	0(0.0%)	0(0.0%)	28522819	16409072	1029641(6.145%)	7104333(42.396%)	2293998(13.69%)	2030258(12.116%)	750900(4.481%)	1623886(9.691%)
CW22	Chr09	27826909	3366798	4168672	7.03	3541146	801874	4926	793743	0.951918	0	7741	0	391	794133	7741	0(0.0%)	0(0.0%)	7741(100.0%)	0(0.0%)	0(0.0%)	0(0.0%)	27025035	14806208	849322(5.099%)	6945868(41.699%)	1884871(11.316%)	1674629(10.054%)	639942(3.842%)	1194844(7.173%)
CW22	Chr10	26987743	9150257	9696901	1.89	3541146	546644	2778	458109	0.89934	384	79624	200	8328	467064	79624	1259(1.581%)	66326(83.299%)	5009(6.291%)	2321(2.915%)	0(0.0%)	1419(1.782%)	26441099	15357220	908477(5.481%)	7036936(42.451%)	2108854(12.722%)	1741006(10.503%)	593270(3.579%)	1490548(8.992%)
CW22	Chr11	36424515	13471741	13763527	1.68	3541146	291786	860	136980	0.919945	1470	142414	0	10923	149339	142414	0(0.0%)	107155(75.224%)	31337(21.999%)	822(0.577%)	172(0.121%)	1777(1.247%)	36132729	22121242	1156669(4.916%)	10733175(45.615%)	3271596(13.904%)	2150903(9.141%)	819552(3.483%)	2247112(9.55%)
CW22	Chr12	30550620	13394787	13668594	1.26	3541146	273807	1716	273543	0	0	0	0	265	0	0	0	0	0	0	0	0	30276813	17880061	1234098(6.556%)	8123349(43.153%)	2671985(14.194%)	1841941(9.785%)	605632(3.217%)	1818211(9.659%)
CX3	Chr01	45329638	17295542	18115625	1.57	3739086	820083	4114	643451	0.914552	0	161540	0	15093	658543	161540	0(0.0%)	124789(77.25%)	34981(21.655%)	749(0.464%)	0(0.0%)	0(0.0%)	44509555	20316942	1054727(5.042%)	7442893(35.579%)	3290005(15.727%)	3320798(15.874%)	1209719(5.783%)	1501334(7.177%)
CX3	Chr02	38200521	14076180	14526990	1.68	3739086	450810	2575	400694	0.922681	0	46242	0	3875	404568	46242	0(0.0%)	32676(70.663%)	13566(29.337%)	0(0.0%)	0(0.0%)	0(0.0%)	37749711	17965822	1058623(5.736%)	6930602(37.55%)	2714573(14.708%)	2718751(14.73%)	987139(5.348%)	1397946(7.574%)
CX3	Chr03	39522071	21093152	21409885	1.16	3739086	316733	1693	257503	0.829701	0	49144	0	10087	267589	49144	0(0.0%)	46415(94.447%)	2418(4.92%)	0(0.0%)	0(0.0%)	0(0.0%)	39205338	17350794	1145489(6.294%)	6638859(36.478%)	2452161(13.474%)	2799865(15.384%)	1075321(5.908%)	1099802(6.043%)
CX3	Chr04	36145189	9491693	9592630	2.8	3739086	100937	375	58270	0.972415	0	41491	0	1177	59446	41491	0(0.0%)	40596(97.838%)	866(2.087%)	0(0.0%)	0(0.0%)	31(0.075%)	36044252	20045783	1117965(5.47%)	9555996(46.753%)	2558009(12.515%)	2303860(11.272%)	740034(3.621%)	2067735(10.116%)
CX3	Chr05	31381887	12571111	12885674	1.47	3739086	314563	1784	286861	0.822618	0	22789	0	4914	291774	22789	0(0.0%)	13433(58.945%)	9356(41.055%)	0(0.0%)	0(0.0%)	0(0.0%)	31067324	16244629	974968(5.769%)	7353474(43.51%)	2131403(12.611%)	2088286(12.356%)	801060(4.74%)	1255016(7.426%)
CX3	Chr06	31849993	15591535	15735566	1.03	3739086	144031	695	104883	0.931441	0	36465	0	2684	107566	36465	0(0.0%)	27723(76.026%)	7733(21.207%)	0(0.0%)	0(0.0%)	0(0.0%)	31705962	16775665	994559(5.791%)	6913442(40.253%)	2332813(13.583%)	2378170(13.847%)	824205(4.799%)	1496182(8.711%)
CX3	Chr07	30483398	13003651	13394768	1.31	3739086	391117	2446	378102	0.955055	0	12431	0	585	378686	12431	0(0.0%)	11582(93.17%)	849(6.83%)	0(0.0%)	0(0.0%)	0(0.0%)	30092281	16113659	1114755(6.761%)	6917341(41.954%)	2250144(13.647%)	2134444(12.945%)	708034(4.294%)	1272270(7.716%)
CX3	Chr08	31026133	13101006	13367915	1.35	3739086	266909	445	67010	0.878099	414	175532	0	23954	91460	175532	167(0.095%)	120651(68.585%)	47265(26.868%)	1090(0.62%)	163(0.093%)	4395(2.498%)	30759224	17273732	996416(5.45%)	7928781(43.368%)	2258068(12.351%)	2161753(11.824%)	754290(4.126%)	1545615(8.454%)
CX3	Chr09	24999922	3304575	3495735	6.51	3739086	191160	617	101005	0.91985	0	82930	0	7226	108230	82930	0(0.0%)	76651(92.429%)	0(0.0%)	0(0.0%)	0(0.0%)	6215(7.494%)	24808762	13995742	886958(6.108%)	6259358(43.108%)	1947632(13.413%)	1573082(10.834%)	618486(4.26%)	1146462(7.896%)
CX3	Chr10	26274282	10135812	10268752	1.58	3739086	132940	335	54781	0.802661	1830	62736	0	13594	70204	62736	3680(5.815%)	35620(56.286%)	14171(22.393%)	5831(9.214%)	0(0.0%)	1437(2.271%)	26141342	15510308	887127(5.522%)	7311457(45.508%)	2126231(13.234%)	1891471(11.773%)	553117(3.443%)	1280057(7.967%)
CX3	Chr11	34053090	14033001	14384919	1.4	3739086	351918	1251	195273	0.945137	0	148052	0	8594	203866	148052	0(0.0%)	115200(77.81%)	32269(21.796%)	75(0.051%)	0(0.0%)	0(0.0%)	33701172	20932333	1158686(5.4%)	9647545(44.963%)	3294496(15.354%)	2295648(10.699%)	826033(3.85%)	2068824(9.642%)
CX3	Chr12	28499247	11425025	11682910	1.47	3739086	257885	799	126009	0.928911	0	122502	0	9375	135383	122502	0(0.0%)	111666(91.022%)	10543(8.594%)	0(0.0%)	0(0.0%)	0(0.0%)	28241362	16275722	1057383(6.132%)	7480721(43.381%)	2376854(13.783%)	1701632(9.868%)	595121(3.451%)	1640935(9.516%)
CX20	Chr01	45312942	17290287	18124539	1.57	3753983	834252	4136	647745	0.932212	0	173865	0	12643	660387	173865	0(0.0%)	126403(72.702%)	45572(26.211%)	749(0.431%)	0(0.0%)	0(0.0%)	44478690	20303308	1055044(5.049%)	7438098(35.596%)	3279403(15.694%)	3321047(15.893%)	1211353(5.797%)	1503458(7.195%)
CX20	Chr02	38229345	14092200	14547592	1.68	3753983	455392	2579	401246	0.937503	0	50763	0	3384	404629	50763	0(0.0%)	37197(73.276%)	13566(26.724%)	0(0.0%)	0(0.0%)	0(0.0%)	37773953	17991073	1058351(5.724%)	6927819(37.465%)	2720312(14.711%)	2728728(14.757%)	990921(5.359%)	1402350(7.584%)
CX20	Chr03	39496377	21067637	21382827	1.16	3753983	315190	1732	263784	0.955473	0	49118	0	2289	266072	49118	0(0.0%)	46389(94.444%)	2418(4.923%)	0(0.0%)	0(0.0%)	0(0.0%)	39181187	17342417	1146896(6.302%)	6634490(36.455%)	2452153(13.474%)	2796102(15.364%)	1074040(5.902%)	1101598(6.053%)
CX20	Chr04	36117258	9444157	9544924	2.81	3753983	100767	358	55784	0.922395	0	41493	0	3491	59274	41493	0(0.0%)	40598(97.838%)	866(2.087%)	0(0.0%)	0(0.0%)	31(0.075%)	36016491	20025463	1111055(5.443%)	9533018(46.706%)	2564122(12.563%)	2304643(11.291%)	741220(3.632%)	2063426(10.11%)
CX20	Chr05	31417009	12602470	12917191	1.47	3753983	314721	1786	287294	0.830684	0	22784	0	4644	291937	22784	0(0.0%)	13427(58.932%)	9357(41.068%)	0(0.0%)	0(0.0%)	0(0.0%)	31102288	16266909	975370(5.761%)	7351970(43.425%)	2158105(12.747%)	2077692(12.272%)	802548(4.74%)	1265353(7.474%)
CX20	Chr06	31784248	15586656	15730683	1.03	3753983	144027	681	103153	0.894434	0	36560	0	4315	107467	36560	0(0.0%)	27818(76.089%)	7733(21.152%)	0(0.0%)	0(0.0%)	0(0.0%)	31640221	16731055	997953(5.828%)	6872728(40.138%)	2328289(13.598%)	2371203(13.848%)	827621(4.833%)	1502205(8.773%)
CX20	Chr07	30432173	12996481	13393279	1.31	3753983	396798	2459	380330	0.921671	0	15179	0	1290	381619	15179	0(0.0%)	14332(94.42%)	847(5.58%)	0(0.0%)	0(0.0%)	0(0.0%)	30035375	16076813	1114086(6.779%)	6904944(42.013%)	2243701(13.652%)	2124712(12.928%)	706850(4.301%)	1269303(7.723%)
CX20	Chr08	31024028	13102270	13369935	1.35	3753983	267665	450	68202	0.879447	0	175418	0	24046	92330	175418	167(0.095%)	120507(68.548%)	47295(26.903%)	1090(0.62%)	163(0.093%)	4395(2.5%)	30756363	17286481	997722(5.456%)	7940307(43.422%)	2254304(12.328%)	2164154(11.835%)	754201(4.124%)	1545162(8.45%)
CX20	Chr09	24760356	3048289	3239454	7.06	3753983	191165	617	100964	0.919514	0	82942	0	7260	108223	82942	0(0.0%)	76663(92.43%)	0(0.0%)	0(0.0%)	0(0.0%)	6215(7.493%)	24569191	13786772	865228(6.043%)	6119252(42.74%)	1927148(13.46%)	1558607(10.886%)	618046(4.317%)	1136575(7.938%)
CX20	Chr10	26378390	10247018	10379792	1.56	3753983	132774	334	54625	0.80279	1830	62738	0	13582	70036	62738	3680(5.815%)	35625(56.292%)	14171(22.392%)	5828(9.209%)	0(0.0%)	1437(2.271%)	26245616	15505413	887392(5.527%)	7308745(45.52%)	2127832(13.252%)	1889647(11.769%)	552931(3.444%)	1280824(7.977%)
CX20	Chr11	33754762	14030489	14373681	1.38	3753983	343192	1189	185616	0.939617	0	148062	0	9515	195130	148062	0(0.0%)	115177(77.79%)	32302(21.817%)	75(0.051%)	0(0.0%)	0(0.0%)	33411570	20696707	1148536(5.413%)	9574571(45.127%)	3198693(15.076%)	2291297(10.799%)	799726(3.769%)	2039147(9.611%)
CX20	Chr12	28511580	11430827	11688867	1.47	3753983	258040	801	126393	0.929729	0	122397	0	9251	135643	122397	0(0.0%)	111631(91.066%)	10481(8.55%)	0(0.0%)	0(0.0%)	0(0.0%)	28253540	16268108	1056520(6.122%)	7479310(43.34%)	2373513(13.754%)	1700294(9.853%)	595211(3.449%)	1641099(9.51%)
HuaZhan	Chr01	44784595	17323099	18155195	1.54	3589351	832096	4124	646088	0.933294	0	173601	0	12408	658495	173601	0(0.0%)	126154(72.669%)	45557(26.242%)	749(0.431%)	0(0.0%)	0(0.0%)	43952499	19817249	1035724(5.07%)	7152926(35.014%)	3241056(15.865%)	3250758(15.913%)	1217889(5.962%)	1472605(7.208%)
HuaZhan	Chr02	38154215	13970596	14436668	1.7	3589351	466072	2675	416170	0.927018	0	46261	0	3642	419811	46261	0(0.0%)	32695(70.675%)	13566(29.325%)	0(0.0%)	0(0.0%)	0(0.0%)	37688143	17988562	991528(5.364%)	6990315(37.815%)	2726540(14.75%)	2665611(14.42%)	963421(5.212%)	1470241(7.954%)
HuaZhan	Chr03	39295541	21140158	21265479	1.17	3589351	125321	631	96639	0.989157	0	28372	0	311	96949	28372	0(0.0%)	28372(100.0%)	0(0.0%)	0(0.0%)	0(0.0%)	0(0.0%)	39170220	17397841	1155073(6.344%)	6733426(36.979%)	2430920(13.35%)	2731343(15.0%)	1045996(5.745%)	1143813(6.282%)
HuaZhan	Chr04	37358680	10306861	10459724	2.61	3589351	152863	433	67489	0.958067	0	81795	0	3580	71068	81795	0(0.0%)	65966(80.646%)	15671(19.158%)	0(0.0%)	0(0.0%)	160(0.196%)	37205817	20973075	1173264(5.492%)	9886127(46.28%)	2725306(12.758%)	2404930(11.258%)	752704(3.524%)	2269211(10.623%)
HuaZhan	Chr05	31276222	12596127	12706734	1.47	3589351	110607	705	110046	0.822064	0	462	0	100	110145	462	0(0.0%)	462(100.0%)	0(0.0%)	0(0.0%)	0(0.0%)	0(0.0%)	31165615	16147488	1002068(5.895%)	7301468(42.95%)	2064999(12.147%)	2087877(12.282%)	800018(4.706%)	1259385(7.408%)
HuaZhan	Chr06	31977090	15328631	15435955	1.08	3589351	107324	618	92684	0.879995	0	12884	0	1757	94440	12884	0(0.0%)	4713(36.58%)	7161(55.581%)	0(0.0%)	0(0.0%)	0(0.0%)	31869766	16933821	1051148(6.062%)	7003074(40.384%)	2260508(13.035%)	2440172(14.072%)	857900(4.947%)	1496435(8.629%)
HuaZhan	Chr07	30453795	12984756	13334310	1.32	3589351	349554	2153	333261	0.959372	0	15632	0	662	333922	15632	0(0.0%)	9565(61.189%)	6046(38.677%)	0(0.0%)	0(0.0%)	0(0.0%)	30104241	16142400	1098919(6.646%)	7052287(42.647%)	2194287(13.27%)	2126194(12.858%)	711238(4.301%)	1254476(7.586%)
HuaZhan	Chr08	31318098	13176490	13323528	1.37	3589351	147038	473	72784	0.908693	0	67475	0	6780	79563	67475	0(0.0%)	43917(65.086%)	22945(34.005%)	0(0.0%)	0(0.0%)	0(0.0%)	31171060	17330312	1043287(5.596%)	7962565(42.713%)	2281764(12.24%)	2146796(11.516%)	748677(4.016%)	1513878(8.121%)
HuaZhan	Chr09	25301033	3182375	3359576	6.89	3589351	177201	575	94117	0.911837	0	75760	0	7325	101441	75760	0(0.0%)	69482(91.713%)	0(0.0%)	0(0.0%)	0(0.0%)	6215(8.204%)	25123832	13948531	878357(5.952%)	6251469(42.365%)	1929976(13.079%)	1639325(11.109%)	617625(4.186%)	1134630(7.689%)
HuaZhan	Chr10	25667382	8863868	9096980	1.87	3589351	233112	459	75919	0.853544	950	134172	0	22072	98940	134172	3941(2.934%)	80646(60.046%)	30269(22.537%)	6718(5.002%)	0(0.0%)	8423(6.271%)	25434270	14881978	936596(6.066%)	6737999(43.638%)	2158722(13.981%)	1835518(11.888%)	563104(3.647%)	1238045(8.018%)
HuaZhan	Chr11	32330553	13243630	13672368	1.41	3589351	428738	1271	198819	0.90892	1470	208979	0	19471	219851	208979	0(0.0%)	158693(75.937%)	46212(22.113%)	819(0.392%)	172(0.082%)	1680(0.804%)	31901815	19367366	1108465(5.574%)	8755259(44.024%)	2918238(14.674%)	2232422(11.225%)	741310(3.728%)	1972117(9.916%)
HuaZhan	Chr12	27004485	11005306	11464731	1.41	3589351	459425	956	150051	0.885459	5755	273939	0	29681	185676	273939	0(0.0%)	231865(83.277%)	30690(11.023%)	8471(3.042%)	4010(1.44%)	194(0.07%)	26545060	14754100	1036205(6.629%)	6203793(39.689%)	2330144(14.907%)	1701177(10.883%)	585189(3.744%)	1462728(9.358%)
J4155S	Chr01	45087892	17180575	17772951	1.59	3856010	592376	2899	457125	0.927284	0	125417	0	9835	466959	125417	0(0.0%)	102351(81.609%)	22741(18.132%)	0(0.0%)	0(0.0%)	0(0.0%)	44495516	20297870	1048669(5.016%)	7467750(35.718%)	3250376(15.546%)	3299726(15.782%)	1208360(5.78%)	1543912(7.384%)
J4155S	Chr02	38079500	13945626	14524944	1.69	3856010	579318	3363	523005	0.940477	0	52962	0	3352	526356	52962	0(0.0%)	39396(74.385%)	13566(25.615%)	0(0.0%)	0(0.0%)	0(0.0%)	37500182	17797328	1018208(5.565%)	6859274(37.488%)	2714410(14.835%)	2715473(14.841%)	984720(5.382%)	1335476(7.299%)
J4155S	Chr03	39643085	21110436	21420460	1.16	3856010	310024	1654	251758	0.949371	0	55317	0	2950	254707	55317	0(0.0%)	52588(95.067%)	2418(4.371%)	0(0.0%)	0(0.0%)	0(0.0%)	39333061	17583353	1177657(6.411%)	6933287(37.742%)	2429109(13.223%)	2767807(15.067%)	1038536(5.653%)	1092568(5.947%)
J4155S	Chr04	35797540	9646305	9762069	2.7	3856010	115764	246	38558	0.784488	0	60568	0	16639	55196	60568	0(0.0%)	43343(71.561%)	17193(28.386%)	0(0.0%)	0(0.0%)	32(0.053%)	35681776	19469603	1251482(6.293%)	8563317(43.06%)	2851110(14.337%)	2397143(12.054%)	791662(3.981%)	1835584(9.23%)
J4155S	Chr05	31311778	12597105	12708246	1.48	3856010	111141	708	110613	0.882798	0	467	0	62	110674	467	0(0.0%)	467(100.0%)	0(0.0%)	0(0.0%)	0(0.0%)	0(0.0%)	31200637	16399384	953414(5.586%)	7631274(44.715%)	2071641(12.139%)	2074583(12.156%)	815350(4.778%)	1227966(7.195%)
J4155S	Chr06	32381000	15502833	15627699	1.08	3856010	124866	708	102576	0.928895	0	20706	0	1585	104160	20706	0(0.0%)	13414(64.783%)	6283(30.344%)	0(0.0%)	0(0.0%)	0(0.0%)	32256134	17293056	1082743(6.119%)	7320193(41.369%)	2377483(13.436%)	2392460(13.521%)	821576(4.643%)	1485389(8.394%)
J4155S	Chr07	31588791	13008597	13524633	1.39	3856010	516036	3242	501068	0.93226	0	13955	0	1014	502081	13955	0(0.0%)	13108(93.93%)	847(6.07%)	0(0.0%)	0(0.0%)	0(0.0%)	31072755	17011890	1131908(6.518%)	7754447(44.652%)	2273118(13.089%)	2182584(12.568%)	708863(4.082%)	1245385(7.171%)
J4155S	Chr08	31703024	13534011	13788934	1.32	3856010	254923	409	61821	0.890835	0	172023	0	21080	82983	172023	167(0.097%)	117007(67.995%)	47061(27.348%)	1090(0.633%)	29(0.017%)	4395(2.554%)	31448101	17533672	1007580(5.343%)	8212932(43.556%)	2302084(12.209%)	2115415(11.219%)	772698(4.098%)	1482199(7.861%)
J4155S	Chr09	24844691	3161366	3350355	6.8	3856010	188989	645	105534	0.943012	0	78700	0	4756	110289	78700	0(0.0%)	72421(92.022%)	0(0.0%)	0(0.0%)	0(0.0%)	6215(7.897%)	24655702	13848580	895224(6.239%)	6160870(42.934%)	1896345(13.215%)	1589141(11.074%)	618447(4.31%)	1189457(8.289%)
J4155S	Chr10	25774949	9167133	9395910	1.79	3856010	228777	511	84399	0.857195	950	123761	0	19668	105049	123761	4113(3.32%)	72461(58.485%)	29358(23.695%)	5704(4.604%)	0(0.0%)	8423(6.798%)	25546172	15016260	897415(5.758%)	6929890(44.461%)	2136696(13.709%)	1808601(11.604%)	556556(3.571%)	1266643(8.127%)
J4155S	Chr11	31904903	13325305	13700999	1.37	3856010	375694	1335	208408	0.955621	0	159863	0	7424	215831	159863	0(0.0%)	118803(74.316%)	40477(25.32%)	75(0.047%)	0(0.0%)	0(0.0%)	31529209	18908662	1078181(5.551%)	8474890(43.634%)	2882927(14.843%)	2175545(11.201%)	725617(3.736%)	1927998(9.926%)
J4155S	Chr12	28241495	11219397	11677499	1.48	3856010	458102	953	149280	0.877713	10950	271058	0	26815	187234	271058	0(0.0%)	231815(82.695%)	32641(11.644%)	8472(3.022%)	4010(1.43%)	194(0.069%)	27783393	15761551	1052951(6.323%)	6910633(41.502%)	2422473(14.548%)	1684090(10.114%)	634725(3.812%)	1574191(9.454%)
LK638S	Chr01	45027266	17095634	17933278	1.58	4173281	837644	4160	651836	0.934503	0	173639	0	12170	664005	173639	0(0.0%)	126160(72.656%)	45589(26.255%)	749(0.431%)	0(0.0%)	0(0.0%)	44189622	20020865	1033755(5.01%)	7131248(34.562%)	3337606(16.176%)	3335710(16.167%)	1204605(5.838%)	1496835(7.255%)
LK638S	Chr02	37320999	13939205	14383304	1.65	4173281	444099	2534	394214	0.927896	0	46289	0	3597	397810	46289	0(0.0%)	32723(70.693%)	13566(29.307%)	0(0.0%)	0(0.0%)	0(0.0%)	36876900	17245127	970034(5.464%)	6508862(36.665%)	2623841(14.78%)	2723046(15.339%)	960449(5.41%)	1311622(7.388%)
LK638S	Chr03	39577075	21008412	21318436	1.15	4173281	310024	1655	251907	0.951753	0	55314	0	2804	254710	55314	0(0.0%)	52585(95.066%)	2418(4.371%)	0(0.0%)	0(0.0%)	0(0.0%)	39267051	17494876	1174564(6.421%)	6825867(37.312%)	2453312(13.411%)	2746290(15.012%)	1039826(5.684%)	1086801(5.941%)
LK638S	Chr04	37222143	10261003	10359957	2.62	4173281	98954	346	53973	0.922413	0	41492	0	3490	57462	41492	0(0.0%)	40597(97.838%)	866(2.087%)	0(0.0%)	0(0.0%)	31(0.075%)	37123189	20893120	1159997(5.444%)	10043209(47.135%)	2704573(12.693%)	2364215(11.096%)	733721(3.444%)	2103444(9.872%)
LK638S	Chr05	31384269	12456381	12568917	1.51	4173281	112536	716	111944	0.779089	0	462	0	131	112074	462	0(0.0%)	462(100.0%)	0(0.0%)	0(0.0%)	0(0.0%)	0(0.0%)	31271733	16235724	979065(5.727%)	7475380(43.728%)	2068624(12.101%)	2054255(12.016%)	811902(4.749%)	1216100(7.114%)
LK638S	Chr06	32812028	16206815	16308008	1.02	4173281	101193	573	86144	0.859934	0	12942	0	2108	88251	12942	0(0.0%)	4736(36.594%)	7196(55.602%)	0(0.0%)	0(0.0%)	0(0.0%)	32710835	17820242	1045273(5.733%)	8048245(44.142%)	2291347(12.567%)	2332185(12.791%)	810146(4.443%)	1496317(8.207%)
LK638S	Chr07	30951508	13010554	13526608	1.34	4173281	516054	3242	501085	0.932265	0	13956	0	1014	502098	13956	0(0.0%)	13109(93.931%)	847(6.069%)	0(0.0%)	0(0.0%)	0(0.0%)	30435454	16453432	1120458(6.662%)	7354962(43.734%)	2198096(13.07%)	2146731(12.765%)	709826(4.221%)	1211816(7.206%)
LK638S	Chr08	31317370	12911414	13178930	1.4	4173281	267516	450	66535	0.873282	414	175514	0	25054	92085	175514	167(0.095%)	120523(68.647%)	47038(26.792%)	1091(0.621%)	29(0.017%)	4395(2.503%)	31049854	17335237	1029563(5.56%)	8087442(43.676%)	2208341(11.926%)	2124480(11.473%)	760894(4.109%)	1537898(8.305%)
LK638S	Chr09	24080174	2841482	3499303	7.24	4173281	657821	4029	648773	0.969831	0	8776	0	273	649045	8776	0(0.0%)	8776(100.0%)	0(0.0%)	0(0.0%)	0(0.0%)	0(0.0%)	23422353	12671230	852668(6.472%)	5052358(38.347%)	1907926(14.481%)	1573944(11.946%)	631072(4.79%)	1156782(8.78%)
LK638S	Chr10	25777965	9609729	9742825	1.67	4173281	133096	336	54957	0.802764	1830	62728	0	13582	70368	62728	3680(5.816%)	35615(56.285%)	14171(22.396%)	5828(9.21%)	0(0.0%)	1437(2.271%)	25644869	15132549	898467(5.724%)	7078559(45.098%)	2083847(13.276%)	1839100(11.717%)	554052(3.53%)	1253240(7.984%)
LK638S	Chr11	32491896	13288484	13723383	1.41	4173281	434899	1318	205796	0.896977	1470	205501	0	22133	229490	205501	0(0.0%)	155215(75.53%)	46211(22.487%)	821(0.4%)	172(0.084%)	1680(0.818%)	32056997	19423083	1093244(5.478%)	8647103(43.326%)	2940888(14.735%)	2166449(10.855%)	748662(3.751%)	2160783(10.826%)
LK638S	Chr12	28229411	11345402	11604847	1.47	4173281	259445	806	127156	0.925905	0	122488	0	9802	136957	122488	0(0.0%)	111724(91.074%)	10479(8.542%)	0(0.0%)	0(0.0%)	0(0.0%)	27969966	16070684	1081157(6.373%)	7381493(43.512%)	2353835(13.875%)	1669189(9.839%)	594205(3.503%)	1571612(9.264%)
MH63	Chr01	45027022	17460128	18186401	1.54	3807588	726273	3383	534915	0.932786	0	178497	0	12862	547776	178497	0(0.0%)	147162(82.445%)	26270(14.717%)	1427(0.799%)	0(0.0%)	0(0.0%)	44300749	20054951	1056645(5.116%)	7186410(34.794%)	3256301(15.766%)	3323510(16.091%)	1234153(5.975%)	1502278(7.274%)
MH63	Chr02	37301368	13766109	14305576	1.67	3807588	539467	3103	483000	0.929783	0	52503	0	3965	486964	52503	0(0.0%)	38937(74.161%)	13566(25.839%)	0(0.0%)	0(0.0%)	0(0.0%)	36761901	17052411	984874(5.614%)	6225536(35.487%)	2620201(14.936%)	2769159(15.785%)	990483(5.646%)	1293234(7.372%)
MH63	Chr03	39893253	21206336	21518901	1.15	3807588	312565	1585	243285	0.974741	0	67531	0	1750	245034	67531	0(0.0%)	56034(82.975%)	11497(17.025%)	0(0.0%)	0(0.0%)	0(0.0%)	39580688	17880512	1096315(5.88%)	7373375(39.544%)	2450320(13.141%)	2716843(14.571%)	1048569(5.624%)	1095104(5.873%)
MH63	Chr04	37319239	9566867	9719000	2.88	3807588	152133	420	65449	0.94465	0	81887	0	4798	70246	81887	0(0.0%)	66005(80.603%)	15724(19.202%)	0(0.0%)	0(0.0%)	160(0.195%)	37167106	21011887	1109088(5.181%)	10144455(47.391%)	2657745(12.416%)	2381592(11.126%)	764379(3.571%)	2196073(10.259%)
MH63	Chr05	31307418	12590137	12698887	1.48	3807588	108750	694	108261	0.926531	0	454	0	36	108296	454	0(0.0%)	454(100.0%)	0(0.0%)	0(0.0%)	0(0.0%)	0(0.0%)	31198668	16341399	960003(5.643%)	7539095(44.317%)	2055142(12.081%)	2113058(12.421%)	813590(4.783%)	1225465(7.204%)
MH63	Chr06	31921180	15497218	15619441	1.05	3807588	122223	624	94046	0.933423	0	26302	0	1876	95921	26302	0(0.0%)	18096(68.801%)	7196(27.359%)	0(0.0%)	0(0.0%)	0(0.0%)	31798957	16959168	1032962(5.951%)	7185595(41.399%)	2255979(12.998%)	2332845(13.44%)	823122(4.742%)	1535934(8.849%)
MH63	Chr07	30877072	12657517	13158908	1.4	3807588	501391	3131	484078	0.964768	0	16704	0	610	484687	16704	0(0.0%)	15845(94.858%)	859(5.142%)	0(0.0%)	0(0.0%)	0(0.0%)	30375681	16334451	1111999(6.644%)	7059585(42.178%)	2288605(13.673%)	2149762(12.844%)	712050(4.254%)	1269495(7.585%)
MH63	Chr08	30492302	13584298	13839359	1.23	3807588	255061	399	60207	0.869226	0	169373	0	25482	85771	169373	167(0.099%)	114513(67.588%)	47001(27.741%)	1090(0.643%)	29(0.017%)	4395(2.594%)	30237241	17288157	1026212(5.793%)	7972319(45.005%)	2290093(12.928%)	2116359(11.947%)	732363(4.134%)	1511097(8.53%)
MH63	Chr09	24892599	3147275	3337496	6.85	3807588	190221	616	100614	0.925431	0	82926	0	6682	107295	82926	0(0.0%)	76646(92.427%)	0(0.0%)	0(0.0%)	0(0.0%)	6216(7.496%)	24702378	13674592	851596(6.009%)	5999081(42.329%)	1953338(13.783%)	1638010(11.558%)	630664(4.45%)	1156415(8.16%)
MH63	Chr10	25690566	9578574	9668983	1.67	3807588	90409	385	60237	0.903059	0	27248	0	2925	63161	27248	0(0.0%)	22667(83.188%)	3722(13.66%)	433(1.589%)	0(0.0%)	0(0.0%)	25600157	15065441	864425(5.532%)	7051233(45.122%)	2058290(13.171%)	1798507(11.509%)	552200(3.534%)	1304890(8.35%)
MH63	Chr11	34100580	13807158	14157337	1.44	3807588	350179	1748	270310	0.95559	0	76323	0	3547	273856	76323	0(0.0%)	53221(69.708%)	23114(30.274%)	0(0.0%)	0(0.0%)	14(0.018%)	33750401	20864786	1146199(5.401%)	9367265(44.14%)	3297473(15.538%)	2310516(10.887%)	838534(3.951%)	2234988(10.531%)
MH63	Chr12	26942889	10603084	11062000	1.5	3807588	458916	1149	179737	0.795712	4076	222147	0	52957	236941	222147	0(0.0%)	184204(81.962%)	19366(8.617%)	8796(3.914%)	4315(1.92%)	122(0.054%)	26483973	14721292	982035(6.323%)	6036606(38.867%)	2363383(15.217%)	1692645(10.898%)	597149(3.845%)	1613859(10.391%)
NH265	Chr01	41201905	16100354	17159806	1.49	5798085	1059452	6606	1036762	0.929443	0	21090	0	1601	1038362	21090	0(0.0%)	13362(63.357%)	7728(36.643%)	0(0.0%)	0(0.0%)	0(0.0%)	40142453	16110349	1116442(6.693%)	4219192(25.294%)	3077776(18.452%)	2891345(17.334%)	1193798(7.157%)	1208513(7.245%)
NH265	Chr02	34984394	13329102	13901895	1.58	5798085	572793	3450	550281	0.815706	0	18364	0	4149	554429	18364	0(0.0%)	8864(48.268%)	9500(51.732%)	0(0.0%)	0(0.0%)	0(0.0%)	34411601	14587841	984416(6.538%)	4095977(27.202%)	2703058(17.951%)	2520166(16.737%)	958550(6.366%)	1140642(7.575%)
NH265	Chr03	35680224	19061327	19473376	1.18	5798085	412049	2347	361471	0.84545	0	42762	0	7817	369287	42762	45(0.105%)	4420(10.336%)	38050(88.981%)	0(0.0%)	0(0.0%)	0(0.0%)	35268175	13847660	1108032(7.717%)	3951194(27.519%)	2403939(16.743%)	2426764(16.902%)	1014119(7.063%)	879718(6.127%)
NH265	Chr04	31810025	7925319	8342491	2.96	5798085	417172	1908	297492	0.923079	0	110475	0	9206	306697	110475	0(0.0%)	82466(74.647%)	26875(24.327%)	0(0.0%)	188(0.17%)	0(0.0%)	31392853	15118680	1149429(7.42%)	5482371(35.389%)	2533851(16.356%)	2053358(13.255%)	730994(4.719%)	1420107(9.167%)
NH265	Chr05	26850216	10558458	11286808	1.47	5798085	728350	4477	704982	0.759639	0	17752	0	5617	710598	17752	0(0.0%)	14486(81.602%)	2111(11.892%)	0(0.0%)	100(0.563%)	345(1.943%)	26121866	11743330	893363(7.388%)	3637823(30.085%)	1957773(16.191%)	1874008(15.498%)	772765(6.391%)	1066746(8.822%)
NH265	Chr06	29271838	15065002	15417928	1.09	5798085	352926	2071	319679	0.784137	0	26071	0	7177	326855	26071	0(0.0%)	16224(62.23%)	9110(34.943%)	92(0.353%)	0(0.0%)	27(0.104%)	28918912	14149553	984646(6.758%)	4732668(32.481%)	2296152(15.759%)	2205868(15.139%)	771952(5.298%)	1389778(9.538%)
NH265	Chr07	26896623	11421128	11631437	1.34	5798085	210309	1199	197399	0.942142	0	12164	0	747	198145	12164	0(0.0%)	4447(36.559%)	7717(63.441%)	0(0.0%)	0(0.0%)	0(0.0%)	26686314	12733146	1062325(8.123%)	3844920(29.4%)	2346721(17.944%)	2051089(15.684%)	689625(5.273%)	1040830(7.959%)
NH265	Chr08	25845350	10772686	11155398	1.36	5798085	382712	1891	291741	0.814723	415	74117	0	16440	308637	74117	134(0.18%)	50064(67.21%)	10984(14.746%)	1345(1.806%)	6560(8.807%)	4188(5.622%)	25462638	12541190	934368(7.16%)	4159690(31.877%)	2056441(15.759%)	1837447(14.081%)	705984(5.41%)	1319732(10.114%)
NH265	Chr09	22410233	2624106	3112778	7.35	5798085	488672	3055	488163	0	0	0	0	510	0	0	0	0	0	0	0	0	21921561	10876189	858673(7.662%)	3524458(31.447%)	2087871(18.629%)	1485449(13.254%)	616765(5.503%)	1003140(8.951%)
NH265	Chr10	23423819	8092678	8445463	1.85	5798085	352785	2143	341903	0.489663	0	5329	0	5554	347456	5329	0(0.0%)	5329(100.0%)	0(0.0%)	0(0.0%)	0(0.0%)	0(0.0%)	23071034	12296750	1019556(8.097%)	4279294(33.985%)	2177114(17.29%)	1657760(13.165%)	523938(4.161%)	1213673(9.639%)
NH265	Chr11	27698586	12369707	12922885	1.19	5798085	553178	2945	470309	0.775202	1470	64241	0	17159	489104	64241	0(0.0%)	33104(51.531%)	21274(33.116%)	3127(4.868%)	360(0.56%)	4563(7.103%)	27145408	14454767	1209350(8.2%)	4342157(29.442%)	2921241(19.807%)	2105003(14.273%)	688295(4.667%)	1586892(10.76%)
NH265	Chr12	25232825	10405236	10672923	1.4	5798085	267687	370	55889	0.816538	3994	172942	0	34863	92276	172942	5626(3.148%)	121869(68.188%)	28746(16.084%)	9204(5.15%)	1532(0.857%)	3224(1.804%)	24965138	13304675	1184803(8.671%)	4751785(34.774%)	2367855(17.328%)	1647468(12.056%)	567418(4.152%)	1431614(10.477%)
NH267	Chr01	40486845	15545064	16014397	1.57	4013419	469333	2909	457179	0.964788	0	11727	0	428	457606	11727	0(0.0%)	4000(34.109%)	7727(65.891%)	0(0.0%)	0(0.0%)	0(0.0%)	40017512	16046700	1089092(6.56%)	4189035(25.232%)	3069985(18.492%)	2905848(17.503%)	1196835(7.209%)	1192712(7.184%)
NH267	Chr02	37770849	15778031	16400319	1.35	4013419	622288	3724	595723	0.810585	0	21534	0	5032	600754	21534	0(0.0%)	8863(41.158%)	12671(58.842%)	0(0.0%)	0(0.0%)	0(0.0%)	37148561	16817576	1022320(5.906%)	5800424(33.509%)	2859062(16.517%)	2622158(15.148%)	983261(5.68%)	1331272(7.691%)
NH267	Chr03	37352825	19952380	20316420	1.17	4013419	364040	2055	316567	0.879029	0	41731	0	5743	322309	41731	0(0.0%)	4420(10.592%)	37120(88.951%)	0(0.0%)	0(0.0%)	0(0.0%)	36988785	15285415	1145354(7.133%)	5154165(32.099%)	2347305(14.619%)	2614730(16.284%)	1021370(6.361%)	916730(5.709%)
NH267	Chr04	33637423	8150605	8669000	3.06	4013419	518395	2581	401665	0.904002	0	105525	0	11206	412870	105525	0(0.0%)	77508(73.45%)	26883(25.475%)	0(0.0%)	188(0.178%)	0(0.0%)	33119028	16945524	1090945(6.299%)	7134586(41.195%)	2521779(14.561%)	2194342(12.67%)	743467(4.293%)	1530674(8.838%)
NH267	Chr05	28094093	10764364	11452566	1.55	4013419	688202	4222	665171	0.771535	0	17770	0	5262	670432	17770	0(0.0%)	14487(81.525%)	2128(11.975%)	0(0.0%)	100(0.563%)	345(1.941%)	27405891	12650359	911958(6.867%)	4254642(32.036%)	1986146(14.955%)	1996539(15.033%)	780539(5.877%)	1137306(8.563%)
NH267	Chr06	30764382	14848754	14978897	1.06	4013419	130143	738	107028	0.895743	0	20706	0	2410	109437	20706	0(0.0%)	13414(64.783%)	6283(30.344%)	0(0.0%)	0(0.0%)	0(0.0%)	30634239	15686440	1032475(6.35%)	6015551(36.995%)	2356036(14.49%)	2276249(13.999%)	805271(4.952%)	1431951(8.806%)
NH267	Chr07	31180528	13231733	13721000	1.32	4013419	489267	3099	479125	0.941043	0	9545	0	598	479722	9545	0(0.0%)	8698(91.126%)	847(8.874%)	0(0.0%)	0(0.0%)	0(0.0%)	30691261	16653273	1096587(6.432%)	7351793(43.122%)	2291011(13.438%)	2156126(12.647%)	710774(4.169%)	1318817(7.736%)
NH267	Chr08	28011408	11905191	12037833	1.34	4013419	132642	382	58637	0.912156	0	67505	0	6501	65137	67505	0(0.0%)	43916(65.056%)	22976(34.036%)	0(0.0%)	0(0.0%)	0(0.0%)	27878766	14331214	979432(6.35%)	5616855(36.415%)	2067978(13.407%)	1953157(12.662%)	746704(4.841%)	1406089(9.116%)
NH267	Chr09	23835920	3083276	3302284	6.66	4013419	219008	769	126007	0.916217	0	85210	0	7792	133798	85210	0(0.0%)	78929(92.629%)	0(0.0%)	0(0.0%)	0(0.0%)	6217(7.296%)	23616912	12832592	913043(6.93%)	5314239(40.334%)	1932035(14.664%)	1569679(11.914%)	615646(4.673%)	1177863(8.94%)
NH267	Chr10	23926598	9236743	9468368	1.57	4013419	231625	498	82404	0.842959	950	125788	0	22484	105837	125788	4065(3.228%)	77026(61.169%)	25213(20.022%)	6739(5.352%)	0(0.0%)	8422(6.688%)	23694973	13041612	861388(6.336%)	5163051(37.979%)	2134491(15.701%)	1663368(12.236%)	539916(3.972%)	1251660(9.207%)
NH267	Chr11	29750724	11947087	11974478	1.49	4013419	27391	85	13412	0.917525	0	12827	0	1153	14612	12827	0(0.0%)	11462(89.358%)	0(0.0%)	1317(10.267%)	0(0.0%)	0(0.0%)	29723333	17353022	1141466(6.4%)	7436202(41.696%)	2718297(15.242%)	2029895(11.382%)	705327(3.955%)	1725896(9.677%)
NH267	Chr12	27052194	11243523	11364608	1.4	4013419	121085	174	27942	0.888495	0	82758	0	10386	38327	82758	0(0.0%)	68416(82.67%)	4288(5.181%)	7386(8.925%)	2134(2.579%)	56(0.068%)	26931109	15177530	1058188(6.592%)	6600343(41.119%)	2310417(14.394%)	1633929(10.179%)	603672(3.761%)	1548101(9.644%)
NH271	Chr01	40430288	15615053	16392929	1.54	5738812	777876	4426	694232	0.270632	0	22637	0	61008	755239	22637	0(0.0%)	14910(65.866%)	7727(34.134%)	0(0.0%)	0(0.0%)	0(0.0%)	39652412	15681907	1068724(6.58%)	3930776(24.201%)	3048008(18.766%)	2882176(17.745%)	1194848(7.356%)	1172410(7.218%)
NH271	Chr02	35136453	13406711	14019480	1.58	5738812	612769	3665	584735	0.826324	0	23166	0	4869	589603	23166	0(0.0%)	13216(57.049%)	9950(42.951%)	0(0.0%)	0(0.0%)	0(0.0%)	34523684	14625507	968352(6.412%)	4054410(26.848%)	2760930(18.282%)	2536831(16.798%)	952116(6.305%)	1158905(7.674%)
NH271	Chr03	35618640	18979129	19465776	1.17	5738812	486647	2348	361618	0.781924	0	97764	0	27266	388883	97764	2528(2.584%)	35971(36.773%)	51189(52.331%)	1041(1.064%)	4176(4.269%)	969(0.991%)	35131993	13746243	1106771(7.763%)	3891519(27.297%)	2379278(16.689%)	2423665(17.001%)	1013701(7.11%)	865611(6.072%)
NH271	Chr04	31694680	7813114	8294809	2.99	5738812	481695	2366	367823	0.928183	0	105695	0	8178	376000	105695	0(0.0%)	77633(73.45%)	26928(25.477%)	0(0.0%)	188(0.178%)	0(0.0%)	31212985	14939292	1122192(7.327%)	5398459(35.248%)	2509533(16.385%)	2035199(13.288%)	731312(4.775%)	1396010(9.115%)
NH271	Chr05	26949518	10602369	11335958	1.47	5738812	733589	4513	710466	0.766736	0	17730	0	5394	715859	17730	0(0.0%)	14496(81.76%)	2079(11.726%)	0(0.0%)	100(0.564%)	345(1.946%)	26215929	11807857	897078(7.373%)	3688565(30.317%)	1941729(15.959%)	1880441(15.455%)	774992(6.37%)	1084052(8.91%)
NH271	Chr06	29420915	15214005	15569278	1.1	5738812	355273	2069	318979	0.80518	0	29224	0	7071	326049	29224	0(0.0%)	19883(68.037%)	8884(30.4%)	46(0.157%)	0(0.0%)	27(0.092%)	29065642	14138247	980657(6.653%)	4734765(32.122%)	2290847(15.542%)	2209883(14.993%)	771328(5.233%)	1381202(9.371%)
NH271	Chr07	26814890	11255001	11489784	1.36	5738812	234783	1350	222255	0.971267	0	12169	0	360	222614	12169	0(0.0%)	4448(36.552%)	7721(63.448%)	0(0.0%)	0(0.0%)	0(0.0%)	26580107	12621889	1054790(8.141%)	3871490(29.88%)	2230514(17.215%)	2044964(15.783%)	687103(5.303%)	1037793(8.01%)
NH271	Chr08	26033138	10879454	11240906	1.36	5738812	361452	2184	338059	0.94926	0	22207	0	1187	339245	22207	0(0.0%)	14029(63.174%)	7744(34.872%)	0(0.0%)	0(0.0%)	0(0.0%)	25671686	12709948	914899(6.914%)	4269505(32.265%)	2069719(15.641%)	1850144(13.982%)	722097(5.457%)	1349539(10.198%)
NH271	Chr09	22205377	2401499	2921087	8.03	5738812	519588	2531	405288	0.849581	408	97108	0	16785	422529	97108	5011(5.16%)	71852(73.992%)	14320(14.746%)	2538(2.614%)	171(0.176%)	1440(1.483%)	21685789	10774008	856196(7.723%)	3537909(31.914%)	1993752(17.985%)	1472830(13.286%)	612014(5.521%)	1014120(9.148%)
NH271	Chr10	23181077	8163038	8509000	1.8	5738812	345962	2104	335839	0.43955	0	4450	0	5674	341512	4450	0(0.0%)	4450(100.0%)	0(0.0%)	0(0.0%)	0(0.0%)	0(0.0%)	22835115	12250722	1035789(8.254%)	4296702(34.238%)	2113420(16.841%)	1654921(13.187%)	527847(4.206%)	1213957(9.673%)
NH271	Chr11	27450168	12250727	12815871	1.19	5738812	565144	3017	483754	0.790272	0	64321	0	17070	500990	64321	0(0.0%)	33169(51.568%)	21289(33.098%)	3127(4.862%)	360(0.56%)	4563(7.094%)	26885024	14203975	1227228(8.461%)	4298040(29.631%)	2783082(19.187%)	2068964(14.264%)	679911(4.687%)	1550533(10.689%)
NH271	Chr12	25337899	10489102	10753136	1.39	5738812	264034	369	55832	0.812082	3995	169078	0	35130	92486	169078	5626(3.217%)	118199(67.595%)	28729(16.429%)	9202(5.262%)	1532(0.876%)	3212(1.837%)	25073865	13375959	1173260(8.547%)	4806743(35.016%)	2373653(17.292%)	1644632(11.981%)	567934(4.137%)	1453758(10.59%)
NH273	Chr01	41374128	16002557	16732651	1.54	4440142	730094	4486	704978	0.980093	0	24617	0	500	705477	24617	0(0.0%)	16890(68.611%)	7727(31.389%)	0(0.0%)	0(0.0%)	0(0.0%)	40644034	16650488	1036157(6.019%)	4765225(27.683%)	3091419(17.959%)	2964292(17.221%)	1189823(6.912%)	1235497(7.178%)
NH273	Chr02	37399693	13829591	14285509	1.67	4440142	455918	2610	406073	0.927316	0	46223	0	3623	409695	46223	0(0.0%)	32658(70.653%)	13565(29.347%)	0(0.0%)	0(0.0%)	0(0.0%)	36943775	17173266	942285(5.33%)	6547218(37.037%)	2635614(14.909%)	2586913(14.634%)	958843(5.424%)	1359788(7.692%)
NH273	Chr03	36106616	19153576	19541896	1.16	4440142	388320	2214	341118	0.883122	0	41686	0	5517	346634	41686	0(0.0%)	4421(10.605%)	37074(88.936%)	0(0.0%)	0(0.0%)	0(0.0%)	35718296	14021052	1124699(7.607%)	4112913(27.817%)	2403936(16.258%)	2418349(16.356%)	1025399(6.935%)	866614(5.861%)
NH273	Chr04	33128961	9385715	9717857	2.49	4440142	332142	1458	226281	0.922692	0	97678	0	8184	234464	97678	0(0.0%)	75893(77.697%)	20651(21.142%)	0(0.0%)	188(0.192%)	0(0.0%)	32796819	16325845	1153130(6.907%)	6135572(36.75%)	2679953(16.052%)	2050563(12.282%)	734424(4.399%)	1808726(10.834%)
NH273	Chr05	27357407	10683388	11413964	1.49	4440142	730576	4493	707297	0.761555	0	17729	0	5551	712847	17729	0(0.0%)	14495(81.759%)	2079(11.727%)	0(0.0%)	100(0.564%)	345(1.946%)	26626831	11948838	948116(7.526%)	3771565(29.94%)	1947926(15.463%)	1891321(15.014%)	778732(6.182%)	1078719(8.563%)
NH273	Chr06	29182615	15245193	15346529	1.1	4440142	101336	576	86606	0.878555	0	12942	0	1789	88394	12942	0(0.0%)	4736(36.594%)	7196(55.602%)	0(0.0%)	0(0.0%)	0(0.0%)	29081279	14331876	1003065(6.793%)	5026582(34.042%)	2244470(15.201%)	2219802(15.034%)	770554(5.219%)	1307775(8.857%)
NH273	Chr07	30406591	13089385	13436777	1.3	4440142	347392	2139	331188	0.964641	0	15632	0	573	331760	15632	0(0.0%)	9565(61.189%)	6046(38.677%)	0(0.0%)	0(0.0%)	0(0.0%)	30059199	16146382	1076803(6.509%)	7121994(43.051%)	2206027(13.335%)	2110578(12.758%)	711291(4.3%)	1229946(7.435%)
NH273	Chr08	27782984	11797634	12103917	1.33	4440142	306283	1828	282993	0.951741	0	22167	0	1124	284116	22167	0(0.0%)	13990(63.112%)	7743(34.93%)	0(0.0%)	0(0.0%)	0(0.0%)	27476701	13813641	956461(6.377%)	5202164(34.683%)	2128878(14.193%)	1925532(12.838%)	719648(4.798%)	1325375(8.836%)
NH273	Chr09	24853562	3111452	3288652	6.93	4440142	177200	572	93719	0.90786	0	75790	0	7692	101410	75790	0(0.0%)	69513(91.718%)	0(0.0%)	0(0.0%)	0(0.0%)	6214(8.199%)	24676362	13797113	839399(5.873%)	6200760(43.382%)	1913069(13.384%)	1588356(11.113%)	620104(4.338%)	1127081(7.885%)
NH273	Chr10	25407823	8572156	8798629	1.94	4440142	226473	475	78442	0.868002	950	128492	0	18590	97981	128492	3941(3.064%)	76144(59.197%)	29361(22.826%)	6447(5.012%)	0(0.0%)	8423(6.548%)	25181350	14700049	929070(6.096%)	6582787(43.189%)	2151126(14.113%)	1832474(12.023%)	564415(3.703%)	1221060(8.011%)
NH273	Chr11	28839097	13163587	13717954	1.15	4440142	554367	2948	473258	0.792874	1470	64310	0	15330	490224	64310	0(0.0%)	33155(51.555%)	21292(33.108%)	3127(4.862%)	360(0.56%)	4563(7.095%)	28284730	15590389	1044172(6.495%)	5559217(34.58%)	2912607(18.117%)	2075914(12.913%)	699318(4.35%)	1717176(10.681%)
NH273	Chr12	25766779	10537191	10627232	1.44	4440142	90041	267	41453	0.861409	0	41855	0	6734	48186	41855	0(0.0%)	40868(97.642%)	825(1.971%)	0(0.0%)	0(0.0%)	0(0.0%)	25676738	13542572	1173058(8.169%)	4992045(34.764%)	2382602(16.592%)	1658824(11.552%)	561889(3.913%)	1424701(9.921%)
NH281	Chr01	40418638	15779016	16551541	1.51	4857629	772525	4542	713146	0.871842	3243	51770	0	4367	720755	51770	0(0.0%)	17347(33.508%)	28365(54.79%)	0(0.0%)	0(0.0%)	332(0.641%)	39646113	15699311	1096952(6.749%)	3886878(23.913%)	3114860(19.163%)	2845510(17.506%)	1188000(7.309%)	1173889(7.222%)
NH281	Chr02	35045116	13211792	13551474	1.63	4857629	339682	1332	213258	0.315041	0	39829	0	86596	299853	39829	0(0.0%)	23499(59.0%)	16330(41.0%)	0(0.0%)	0(0.0%)	0(0.0%)	34705434	14819914	1019387(6.665%)	4287152(28.031%)	2719642(17.782%)	2542999(16.627%)	951417(6.221%)	1126738(7.367%)
NH281	Chr03	36156254	19239131	19625971	1.16	4857629	386840	2192	337998	0.979997	0	47866	0	977	338974	47866	0(0.0%)	21874(45.698%)	25992(54.302%)	0(0.0%)	0(0.0%)	0(0.0%)	35769414	14264545	1130933(7.654%)	4211090(28.499%)	2411815(16.322%)	2473747(16.741%)	1027318(6.952%)	923372(6.249%)
NH281	Chr04	32606448	7909892	8424468	3.06	4857629	514576	2486	387571	0.93605	0	118884	0	8122	395692	118884	0(0.0%)	91782(77.203%)	25968(21.843%)	0(0.0%)	188(0.158%)	0(0.0%)	32091872	15654946	1165097(7.267%)	5801146(36.185%)	2595781(16.192%)	2084968(13.005%)	752608(4.694%)	1479169(9.226%)
NH281	Chr05	26807235	10592505	11144943	1.48	4857629	552438	3277	517442	0.911535	0	31901	200	2896	520537	31901	0(0.0%)	24155(75.719%)	7746(24.281%)	0(0.0%)	0(0.0%)	0(0.0%)	26254797	11815225	941397(7.729%)	3724394(30.578%)	1937684(15.909%)	1865059(15.312%)	761491(6.252%)	1038402(8.525%)
NH281	Chr06	30167319	16182401	16244480	1.16	4857629	62079	327	50675	0.969925	0	11062	0	343	51017	11062	0(0.0%)	4833(43.69%)	6229(56.31%)	0(0.0%)	0(0.0%)	0(0.0%)	30105240	14873150	1010884(6.431%)	5195517(33.054%)	2514488(15.997%)	2200453(13.999%)	776648(4.941%)	1394467(8.872%)
NH281	Chr07	26885984	11031205	11350849	1.41	4857629	319644	1806	295874	0.946069	0	22489	0	1282	297155	22489	0(0.0%)	12069(53.666%)	10420(46.334%)	0(0.0%)	0(0.0%)	0(0.0%)	26566340	12680186	1059110(8.136%)	4014364(30.838%)	2174830(16.707%)	2040090(15.672%)	693391(5.327%)	1023515(7.862%)
NH281	Chr08	26433178	11261087	11600433	1.32	4857629	339346	1647	252582	0.805913	415	69925	0	16425	269463	69925	134(0.191%)	45762(65.392%)	10424(14.895%)	1341(1.916%)	6432(9.191%)	4189(5.986%)	26093832	13188190	1004143(7.354%)	4770680(34.939%)	2075426(15.2%)	1818610(13.319%)	732143(5.362%)	1254283(9.186%)
NH281	Chr09	22686618	2304004	3039466	8.53	4857629	735462	3750	587754	0.842576	5479	124456	0	17774	611055	124456	5226(4.01%)	84436(64.79%)	34535(26.5%)	2728(2.093%)	171(0.131%)	1450(1.113%)	21951156	11044830	921040(8.1%)	3760938(33.077%)	1946053(17.115%)	1471816(12.944%)	620908(5.461%)	1020592(8.976%)
NH281	Chr10	22859738	8135042	8361297	1.78	4857629	226255	665	104193	0.20455	0	24968	0	97095	201287	24968	0(0.0%)	12547(50.252%)	12421(49.748%)	0(0.0%)	0(0.0%)	0(0.0%)	22633483	12151596	974610(7.813%)	4287990(34.376%)	2113686(16.945%)	1654317(13.263%)	534245(4.283%)	1186469(9.512%)
NH281	Chr11	27542739	12245733	12828000	1.2	4857629	582267	2234	358365	0.290081	1470	64950	0	157483	517484	64950	0(0.0%)	39560(60.908%)	15291(23.543%)	3364(5.179%)	360(0.554%)	4562(7.024%)	26960472	14609978	1173532(7.881%)	5028503(33.769%)	2723646(18.291%)	1897640(12.744%)	658808(4.424%)	1541137(10.35%)
NH281	Chr12	24889642	10902353	10928868	1.28	4857629	26515	83	13038	0.97507	0	13142	0	336	13373	13142	0(0.0%)	11458(87.186%)	1684(12.814%)	0(0.0%)	0(0.0%)	0(0.0%)	24863127	13177582	1255641(9.291%)	4455630(32.97%)	2368595(17.527%)	1647016(12.187%)	574106(4.248%)	1495756(11.068%)
NH284	Chr01	41730564	16014609	16503548	1.58	5336880	488939	2444	382909	0.516396	0	54754	0	51277	434185	54754	0(0.0%)	17256(31.516%)	35623(65.06%)	0(0.0%)	0(0.0%)	0(0.0%)	41241625	17099570	1186492(6.71%)	4633185(26.202%)	3259159(18.432%)	3065897(17.339%)	1193844(6.752%)	1306824(7.391%)
NH284	Chr02	36002122	13692484	14256848	1.59	5336880	564364	3297	513921	0.712394	0	35936	0	14508	528428	35936	0(0.0%)	22091(61.473%)	13357(37.169%)	0(0.0%)	0(0.0%)	0(0.0%)	35437758	15798810	1033512(6.345%)	4875879(29.933%)	2726695(16.739%)	2731523(16.769%)	949998(5.832%)	1279565(7.855%)
NH284	Chr03	36049374	18972762	19745975	1.16	5336880	773213	4654	717319	0.934806	0	52251	0	3644	720962	52251	0(0.0%)	8942(17.114%)	43309(82.886%)	0(0.0%)	0(0.0%)	0(0.0%)	35276161	13829398	1153073(8.043%)	3916255(27.317%)	2412422(16.827%)	2408760(16.802%)	1010116(7.046%)	889962(6.208%)
NH284	Chr04	34658403	9358675	9481711	2.69	5336880	123036	329	51702	0.908614	0	64816	0	6519	58220	64816	0(0.0%)	47591(73.425%)	17193(26.526%)	0(0.0%)	0(0.0%)	32(0.049%)	34535367	18575068	1275595(6.726%)	8100289(42.709%)	2775301(14.633%)	2235247(11.786%)	779908(4.112%)	1702596(8.977%)
NH284	Chr05	27523491	10695271	11343923	1.51	5336880	648652	3998	632932	0.83786	0	13172	0	2549	635480	13172	0(0.0%)	5129(38.939%)	7906(60.021%)	0(0.0%)	0(0.0%)	0(0.0%)	26874839	12019776	914671(7.173%)	3791848(29.735%)	1937452(15.193%)	1900014(14.9%)	776115(6.086%)	1136654(8.914%)
NH284	Chr06	30336896	15674923	15798298	1.08	5336880	123375	633	95269	0.935746	0	26301	0	1806	97074	26301	0(0.0%)	18095(68.8%)	7196(27.36%)	0(0.0%)	0(0.0%)	0(0.0%)	30213521	15256333	1026605(6.468%)	5628859(35.463%)	2228637(14.041%)	2273305(14.322%)	789392(4.973%)	1518372(9.566%)
NH284	Chr07	26977446	11508099	11645658	1.33	5336880	137559	833	137329	0	0	0	0	231	0	0	0	0	0	0	0	0	26839887	12837500	1073772(8.147%)	4029409(30.572%)	2255276(17.111%)	2038572(15.467%)	695804(5.279%)	1050238(7.968%)
NH284	Chr08	26223394	11208102	11342600	1.33	5336880	134498	342	52476	0.808273	414	66297	0	15312	68284	66297	167(0.252%)	54044(81.447%)	5625(8.477%)	1093(1.647%)	363(0.547%)	3394(5.115%)	26088896	13263393	954404(7.007%)	4635839(34.033%)	2173705(15.958%)	1872028(13.743%)	720641(5.29%)	1339613(9.834%)
NH284	Chr09	22271244	2765616	3315537	6.85	5336880	549921	2763	443389	0.799818	5701	85207	0	15625	464763	85207	0(0.0%)	66151(72.822%)	18820(20.718%)	2105(2.317%)	180(0.198%)	1238(1.363%)	21721323	10899926	854786(7.638%)	3701005(33.07%)	1918463(17.142%)	1487189(13.289%)	616250(5.506%)	1070041(9.561%)
NH284	Chr10	23181770	8171289	8544497	1.79	5336880	373208	1494	240586	0.566787	1335	75169	0	56119	298108	75169	2293(3.036%)	57400(75.987%)	9182(12.155%)	3420(4.527%)	243(0.322%)	1824(2.415%)	22808562	12260242	1043177(8.27%)	4387030(34.779%)	2139158(16.958%)	1630283(12.924%)	518307(4.109%)	1166279(9.246%)
NH284	Chr11	28144052	12628502	13333603	1.17	5336880	705101	3856	610862	0.735823	1470	69344	0	23426	635924	69344	0(0.0%)	37289(53.774%)	22192(32.003%)	3127(4.509%)	360(0.519%)	4563(6.58%)	27438951	14655189	1185481(7.927%)	4701481(31.439%)	2774823(18.556%)	2076746(13.887%)	677741(4.532%)	1637706(10.951%)
NH284	Chr12	27349421	11155602	11870616	1.39	5336880	715014	3342	515091	0.776995	13735	155340	0	30849	559924	155340	0(0.0%)	120810(71.242%)	21200(12.502%)	9079(5.354%)	13252(7.815%)	465(0.274%)	26634407	15043175	1305476(8.503%)	5630634(36.673%)	2580759(16.809%)	1733913(11.293%)	599726(3.906%)	1652342(10.762%)
NH285	Chr01	40652305	16095309	16868961	1.48	6374426	773652	3888	609202	0.804738	0	132340	0	32111	641312	132340	0(0.0%)	48329(36.519%)	80358(60.721%)	0(0.0%)	0(0.0%)	0(0.0%)	39878653	15737138	1099783(6.75%)	3652059(22.414%)	3387893(20.793%)	2870137(17.615%)	1192961(7.322%)	1145552(7.031%)
NH285	Chr02	34921624	13269650	13898700	1.58	6374426	629050	3718	589000	0.886994	0	35525	0	4526	593525	35525	0(0.0%)	18329(51.595%)	16612(46.761%)	0(0.0%)	0(0.0%)	0(0.0%)	34292574	14524520	1009769(6.736%)	4148009(27.669%)	2646107(17.651%)	2490452(16.612%)	933126(6.224%)	1142917(7.624%)
NH285	Chr03	36262192	19017410	19789812	1.15	6374426	772402	4440	680648	0.936363	0	85916	0	5839	686486	85916	0(0.0%)	33079(38.502%)	52311(60.886%)	0(0.0%)	0(0.0%)	0(0.0%)	35489790	14050118	1159839(7.971%)	4031184(27.704%)	2464305(16.936%)	2395434(16.463%)	1023935(7.037%)	916496(6.299%)
NH285	Chr04	31334283	7693552	8166432	3.01	6374426	472880	2713	421478	0.96257	0	49479	0	1924	423401	49479	0(0.0%)	34190(69.097%)	14818(29.947%)	0(0.0%)	0(0.0%)	0(0.0%)	30861403	14697863	1134831(7.534%)	5213240(34.61%)	2486107(16.505%)	2001008(13.284%)	727154(4.827%)	1389070(9.222%)
NH285	Chr05	26331860	10383322	10830006	1.49	6374426	446684	2673	423354	0.811324	0	18929	0	4402	427755	18929	0(0.0%)	11796(62.317%)	6996(36.959%)	0(0.0%)	0(0.0%)	0(0.0%)	25885176	11511585	935353(7.888%)	3461179(29.188%)	1914002(16.14%)	1835196(15.476%)	771320(6.504%)	1053408(8.883%)
NH285	Chr06	29433595	14644625	14955888	1.01	6374426	311263	1537	235469	0.86383	0	65474	0	10321	245789	65474	0(0.0%)	59279(90.535%)	2778(4.243%)	1043(1.593%)	578(0.883%)	931(1.422%)	29122332	14069742	1042390(7.127%)	4524486(30.937%)	2319819(15.862%)	2199680(15.041%)	788638(5.392%)	1412645(9.659%)
NH285	Chr07	27137477	11393020	11587564	1.36	6374426	194544	883	145584	0.915606	0	44829	0	4132	149715	44829	0(0.0%)	19067(42.533%)	25742(57.423%)	0(0.0%)	0(0.0%)	0(0.0%)	26942933	12957904	1093537(8.223%)	4175461(31.4%)	2270118(17.071%)	2027954(15.25%)	695975(5.234%)	978892(7.361%)
NH285	Chr08	25766615	10780075	11362407	1.34	6374426	582332	3078	475237	0.849443	0	90972	0	16124	491402	90972	134(0.147%)	58803(64.375%)	25470(27.884%)	1218(1.333%)	157(0.172%)	4188(4.585%)	25184283	12429071	911975(7.103%)	4223449(32.894%)	1984390(15.455%)	1810724(14.103%)	727068(5.663%)	1252057(9.752%)
NH285	Chr09	21246340	2459355	2895681	7.46	6374426	436326	1881	302066	0.847499	5475	113786	0	15000	322591	113786	5011(4.216%)	78509(66.055%)	27272(22.946%)	2566(2.159%)	171(0.144%)	1358(1.143%)	20810014	10061105	847516(8.2%)	3174569(30.713%)	1813874(17.549%)	1450719(14.035%)	595962(5.766%)	934190(9.038%)
NH285	Chr10	23305294	7911085	8183830	1.91	6374426	272745	1378	217588	0.157022	0	8661	0	46497	264084	8661	0(0.0%)	0(0.0%)	8661(100.0%)	0(0.0%)	0(0.0%)	0(0.0%)	23032549	12084071	975577(7.821%)	4309654(34.551%)	2078588(16.664%)	1642579(13.169%)	537364(4.308%)	1148900(9.211%)
NH285	Chr11	28681213	12532249	13189050	1.24	6374426	656801	3700	594609	0.768189	0	47776	0	14417	609117	47776	0(0.0%)	30791(64.449%)	13433(28.117%)	705(1.476%)	172(0.36%)	2101(4.398%)	28024412	15110264	1177992(7.638%)	4826903(31.298%)	2836243(18.391%)	2242278(14.539%)	704384(4.567%)	1632645(10.586%)
NH285	Chr12	25417927	10082348	10908095	1.44	6374426	825747	3998	617256	0.886667	0	184863	0	23629	640884	184863	0(0.0%)	140568(76.037%)	34121(18.457%)	7939(4.294%)	2015(1.09%)	4(0.002%)	24592180	13013055	1211014(9.012%)	4572483(34.026%)	2254649(16.778%)	1580175(11.759%)	559858(4.166%)	1483962(11.043%)
NH286	Chr01	40404885	16015010	16501993	1.49	6034229	486983	2417	379098	0.507239	0	54724	0	53162	432259	54724	0(0.0%)	17176(31.387%)	35673(65.187%)	0(0.0%)	0(0.0%)	0(0.0%)	39917902	15840860	1172405(7.146%)	3823746(23.305%)	3144181(19.163%)	2875644(17.526%)	1192000(7.265%)	1228928(7.49%)
NH286	Chr02	36410249	13719236	14276368	1.61	6034229	557132	3179	494917	0.718449	0	44699	0	17517	512433	44699	0(0.0%)	30840(68.995%)	13371(29.913%)	0(0.0%)	0(0.0%)	0(0.0%)	35853117	16235035	1055360(6.304%)	5081583(30.352%)	2773067(16.564%)	2739455(16.363%)	954514(5.701%)	1412129(8.435%)
NH286	Chr03	37420790	20065110	20474225	1.18	6034229	409115	2451	378382	0.939871	0	28886	0	1848	380229	28886	0(0.0%)	28886(100.0%)	0(0.0%)	0(0.0%)	0(0.0%)	0(0.0%)	37011675	15560656	1244892(7.731%)	5011412(31.124%)	2412360(14.982%)	2721258(16.9%)	1045567(6.494%)	1045291(6.492%)
NH286	Chr04	31987382	7235838	7726481	3.35	6034229	490643	2336	364149	0.908257	0	114890	0	11605	375753	114890	0(0.0%)	80014(69.644%)	33742(29.369%)	0(0.0%)	188(0.164%)	0(0.0%)	31496739	15331928	1179402(7.512%)	5763492(36.711%)	2472738(15.75%)	2062399(13.137%)	740424(4.716%)	1378017(8.777%)
NH286	Chr05	27397658	10700532	11348883	1.5	6034229	648351	4000	633176	0.864589	0	13121	0	2055	635230	13121	0(0.0%)	5078(38.701%)	7906(60.255%)	0(0.0%)	0(0.0%)	0(0.0%)	26749307	12045539	921804(7.299%)	3786887(29.987%)	1954216(15.475%)	1903402(15.072%)	776059(6.145%)	1137916(9.011%)
NH286	Chr06	32260381	15839149	15967243	1.03	6034229	128094	662	99731	0.926456	0	26278	0	2086	101816	26278	0(0.0%)	18072(68.772%)	7196(27.384%)	0(0.0%)	0(0.0%)	0(0.0%)	32132287	16955407	1093470(6.21%)	6924103(39.322%)	2269019(12.886%)	2394288(13.597%)	856895(4.866%)	1579730(8.971%)
NH286	Chr07	29788870	12096439	12468373	1.43	6034229	371934	2220	360659	0.885243	0	9982	0	1294	361952	9982	0(0.0%)	9982(100.0%)	0(0.0%)	0(0.0%)	0(0.0%)	0(0.0%)	29416936	15441043	1159142(7.335%)	5847129(37.003%)	2402196(15.202%)	2191376(13.868%)	728107(4.608%)	1365734(8.643%)
NH286	Chr08	28371472	12712120	12783512	1.23	6034229	71392	398	61482	0.935223	0	9269	0	642	62123	9269	0(0.0%)	7625(82.263%)	1031(11.123%)	0(0.0%)	0(0.0%)	0(0.0%)	28300080	15508064	1037073(6.529%)	6134430(38.618%)	2333817(14.692%)	2054846(12.936%)	742304(4.673%)	1632139(10.275%)
NH286	Chr09	23317423	2745129	3297693	7.29	6034229	552564	2779	445971	0.799613	5701	85234	0	15659	467379	85234	0(0.0%)	66171(72.823%)	18820(20.712%)	2112(2.324%)	180(0.198%)	1238(1.362%)	22764859	12088641	838455(6.746%)	4467317(35.943%)	1954635(15.727%)	1626692(13.088%)	633185(5.094%)	1273567(10.247%)
NH286	Chr10	23133430	8112309	8485415	1.81	6034229	373106	1495	240033	0.564866	1335	75169	0	56570	298006	75169	2293(3.036%)	57400(75.987%)	9182(12.155%)	3420(4.527%)	243(0.322%)	1824(2.415%)	22760324	12206753	1019753(8.115%)	4365519(34.741%)	2136504(17.002%)	1630137(12.973%)	517841(4.121%)	1162466(9.251%)
NH286	Chr11	28433738	12177933	13304832	1.24	6034229	1126899	6809	1074904	0.810332	3134	42134	0	6728	1084857	42134	0(0.0%)	36581(81.324%)	5986(13.308%)	2151(4.782%)	172(0.382%)	0(0.0%)	27306839	14824344	1168085(7.726%)	5115386(33.836%)	2716121(17.966%)	1903314(12.59%)	683839(4.523%)	1668499(11.036%)
NH286	Chr12	25750090	10226744	11044760	1.44	6034229	818016	3988	615885	0.888469	0	179588	0	22544	638428	179588	0(0.0%)	135259(75.314%)	34155(19.018%)	7940(4.421%)	2014(1.121%)	4(0.002%)	24932074	13238984	1246359(9.143%)	4700065(34.48%)	2320179(17.021%)	1622263(11.901%)	574288(4.213%)	1419339(10.412%)
NIP	Chr01	43929692	16810093	17514824	1.57	5985947	704731	2727	428659	0.567502	852	156672	0	118549	548116	156672	0(0.0%)	131580(83.984%)	16010(10.219%)	4105(2.62%)	0(0.0%)	3289(2.099%)	43224961	19160005	1159982(5.868%)	5926767(29.98%)	3351515(16.953%)	3381129(17.103%)	1221028(6.176%)	1580773(7.996%)
NIP	Chr02	36447842	13637202	14214500	1.63	5985947	577298	3364	524138	0.676003	0	35937	0	17224	541361	35937	0(0.0%)	22092(61.474%)	13357(37.168%)	0(0.0%)	0(0.0%)	0(0.0%)	35870544	16227422	1070485(6.397%)	5079599(30.354%)	2756398(16.471%)	2745942(16.409%)	958046(5.725%)	1401537(8.375%)
NIP	Chr03	37400343	19993376	20434464	1.18	5985947	441088	2403	371071	0.737425	0	51633	0	18385	389455	51633	707(1.368%)	37420(72.397%)	5721(11.069%)	1041(2.014%)	4452(8.613%)	1038(2.008%)	36959255	15545321	1209024(7.518%)	5054113(31.428%)	2407076(14.968%)	2710745(16.856%)	1034421(6.432%)	1051149(6.536%)
NIP	Chr04	36078291	9956939	10071801	2.61	5985947	114862	310	48542	0.911114	0	60426	0	5895	54436	60426	0(0.0%)	43201(71.494%)	17193(28.453%)	0(0.0%)	0(0.0%)	32(0.053%)	35963429	19791668	1306307(6.466%)	8740106(43.263%)	2863170(14.173%)	2378742(11.775%)	790239(3.912%)	1936394(9.585%)
NIP	Chr05	30400406	12517001	12620959	1.42	5985947	103958	664	103928	0	0	0	0	31	0	0	0	0	0	0	0	0	30296448	15519121	1039055(6.406%)	6481568(39.958%)	2043769(12.599%)	2151442(13.263%)	811205(5.001%)	1348023(8.31%)
NIP	Chr06	32084184	15574402	16299940	1.01	5985947	725538	4673	720891	0.949225	0	4412	0	236	721126	4412	0(0.0%)	4412(100.0%)	0(0.0%)	0(0.0%)	0(0.0%)	0(0.0%)	31358646	16316433	1059126(6.26%)	6081376(35.945%)	2336687(13.811%)	2441980(14.434%)	859304(5.079%)	1701181(10.055%)
NIP	Chr07	29833036	12233619	12436204	1.42	5985947	202585	1215	196375	0.912574	0	5668	0	543	196917	5668	0(0.0%)	5668(100.0%)	0(0.0%)	0(0.0%)	0(0.0%)	0(0.0%)	29630451	15617796	1125754(7.047%)	6033063(37.765%)	2354741(14.74%)	2218479(13.887%)	734113(4.595%)	1409481(8.823%)
NIP	Chr08	28605457	12995307	13137699	1.19	5985947	142392	393	60309	0.808184	414	66339	0	15331	76136	66339	167(0.25%)	54042(81.009%)	5876(8.808%)	1093(1.638%)	492(0.738%)	3418(5.124%)	28463065	15706873	1037865(6.463%)	6298084(39.222%)	2344675(14.602%)	2078154(12.942%)	741888(4.62%)	1619552(10.086%)
NIP	Chr09	23471171	2768415	3320885	7.28	5985947	552470	2779	445823	0.799049	5701	85217	0	15730	467302	85217	0(0.0%)	66126(72.787%)	18836(20.733%)	2112(2.325%)	180(0.198%)	1250(1.376%)	22918701	12195903	855262(6.813%)	4522430(36.027%)	1990478(15.857%)	1619038(12.898%)	639055(5.091%)	1267589(10.098%)
NIP	Chr10	23970450	8327118	8658913	1.84	5985947	331795	1657	269108	0.970329	0	60828	0	1860	270967	60828	0(0.0%)	38415(63.153%)	22272(36.615%)	0(0.0%)	0(0.0%)	0(0.0%)	23638655	13597504	959950(6.92%)	5384111(38.815%)	2219107(15.998%)	1759045(12.681%)	570713(4.114%)	1245395(8.978%)
NIP	Chr11	31210117	12925021	14361844	1.3	5985947	1436823	8305	1310179	0.896672	3134	113559	0	9952	1323356	113559	0(0.0%)	95849(82.34%)	17913(15.388%)	2151(1.848%)	172(0.148%)	0(0.0%)	29773294	17176880	1178715(6.731%)	6245957(35.665%)	2967053(16.942%)	2200607(12.566%)	762570(4.354%)	2123036(12.123%)
NIP	Chr12	28271450	11837938	12490345	1.33	5985947	652407	2950	456410	0.791222	11580	155078	0	29340	497579	155078	0(0.0%)	116722(70.174%)	22816(13.717%)	9454(5.684%)	12313(7.403%)	250(0.15%)	27619043	15844958	1306984(8.079%)	6138982(37.95%)	2653770(16.405%)	1751950(10.83%)	610396(3.773%)	1790559(11.069%)
NJ11	Chr01	45046039	17164066	17752960	1.59	3327518	588894	2875	453397	0.925482	0	125401	0	10097	463493	125401	0(0.0%)	102353(81.621%)	22723(18.12%)	0(0.0%)	0(0.0%)	0(0.0%)	44457145	20299434	1042014(4.982%)	7527535(35.991%)	3226069(15.425%)	3308401(15.818%)	1198256(5.729%)	1503333(7.188%)
NJ11	Chr02	38173349	14045358	14496000	1.69	3327518	450642	2576	400729	0.927255	0	46283	0	3631	404359	46283	0(0.0%)	32717(70.689%)	13566(29.311%)	0(0.0%)	0(0.0%)	0(0.0%)	37722707	17935220	1047037(5.682%)	6939855(37.658%)	2694875(14.623%)	2717614(14.747%)	993617(5.392%)	1392247(7.555%)
NJ11	Chr03	39676330	21094581	21411169	1.15	3327518	316588	1726	262891	0.914969	0	49132	0	4566	267456	49132	0(0.0%)	46403(94.446%)	2418(4.921%)	0(0.0%)	0(0.0%)	0(0.0%)	39359742	17520773	1137386(6.192%)	6852182(37.303%)	2438907(13.277%)	2776012(15.112%)	1080461(5.882%)	1125135(6.125%)
NJ11	Chr04	36376804	9582498	9683420	2.79	3327518	100922	359	55796	0.920026	0	41518	0	3609	59404	41518	0(0.0%)	40623(97.84%)	866(2.086%)	0(0.0%)	0(0.0%)	31(0.075%)	36275882	20248498	1140666(5.522%)	9515657(46.063%)	2690452(13.024%)	2310798(11.186%)	745779(3.61%)	2141306(10.366%)
NJ11	Chr05	30953571	12440471	12551922	1.48	3327518	111451	710	110923	0.882798	0	467	0	62	110984	467	0(0.0%)	467(100.0%)	0(0.0%)	0(0.0%)	0(0.0%)	0(0.0%)	30842120	16050099	954711(5.712%)	7297584(43.662%)	2074145(12.41%)	2084615(12.472%)	815547(4.879%)	1202692(7.196%)
NJ11	Chr06	32515138	15791915	15918864	1.05	3327518	126949	724	104811	0.935273	0	20706	0	1433	106243	20706	0(0.0%)	13414(64.783%)	6283(30.344%)	0(0.0%)	0(0.0%)	0(0.0%)	32388189	17493700	1066935(5.96%)	7530731(42.07%)	2349945(13.128%)	2415672(13.495%)	824774(4.608%)	1483772(8.289%)
NJ11	Chr07	30363355	12999739	13361428	1.31	3327518	361689	2225	344581	0.915892	0	15670	0	1439	346019	15670	0(0.0%)	9603(61.283%)	6046(38.583%)	0(0.0%)	0(0.0%)	0(0.0%)	30001666	16054026	1070104(6.518%)	6993374(42.597%)	2193705(13.362%)	2125316(12.946%)	706558(4.304%)	1274628(7.764%)
NJ11	Chr08	31213589	13109292	13376964	1.36	3327518	267672	451	68318	0.880424	414	175517	0	23424	92238	175517	167(0.095%)	120509(68.51%)	47296(26.888%)	1090(0.62%)	163(0.093%)	4395(2.499%)	30945917	17482487	1026187(5.55%)	8213294(44.419%)	2188836(11.838%)	2138889(11.568%)	760041(4.11%)	1569063(8.486%)
NJ11	Chr09	24783802	3065602	3264527	7.02	3327518	198925	666	108972	0.922738	0	83004	0	6950	115921	83004	0(0.0%)	76725(92.435%)	0(0.0%)	0(0.0%)	0(0.0%)	6215(7.488%)	24584877	13748475	851830(5.977%)	6082007(42.674%)	1916793(13.449%)	1566334(10.99%)	616355(4.325%)	1150121(8.07%)
NJ11	Chr10	26224940	10024765	10157861	1.6	3327518	133096	337	55092	0.814832	1414	63561	0	13030	69535	63561	4499(7.018%)	35614(55.552%)	14171(22.105%)	5842(9.113%)	0(0.0%)	1438(2.243%)	26091844	15500994	887408(5.514%)	7343537(45.633%)	2088271(12.977%)	1886659(11.724%)	555470(3.452%)	1280545(7.957%)
NJ11	Chr11	33224981	13868466	14279764	1.37	3327518	411298	1285	200702	0.919187	1470	193578	0	15549	217812	193578	0(0.0%)	151463(78.244%)	38040(19.651%)	821(0.424%)	172(0.089%)	1680(0.868%)	32813683	20062133	1091449(5.301%)	9283084(45.09%)	2926481(14.215%)	2297123(11.158%)	748941(3.638%)	2060642(10.009%)
NJ11	Chr12	27273016	11387010	11646402	1.37	3327518	259392	806	127217	0.927317	0	122569	0	9607	136823	122569	0(0.0%)	111741(91.028%)	10543(8.589%)	0(0.0%)	0(0.0%)	0(0.0%)	27013624	15739600	1060496(6.612%)	7044827(43.925%)	2305012(14.372%)	1697160(10.582%)	593739(3.702%)	1616299(10.078%)
PI653432	Chr01	44720000	17316691	17908192	1.55	3728877	591501	2873	451517	0.804665	0	112641	0	27344	478860	112641	0(0.0%)	92333(81.971%)	19234(17.075%)	749(0.665%)	0(0.0%)	0(0.0%)	44128499	19948276	1003481(4.882%)	7138392(34.728%)	3219955(15.665%)	3318027(16.142%)	1211911(5.896%)	1582168(7.697%)
PI653432	Chr02	38619671	14002887	14590312	1.72	3728877	587425	3438	534701	0.931778	0	49128	0	3597	538297	49128	0(0.0%)	35562(72.386%)	13566(27.614%)	0(0.0%)	0(0.0%)	0(0.0%)	38032246	18320051	982411(5.218%)	7428265(39.452%)	2724961(14.473%)	2695072(14.314%)	970969(5.157%)	1368251(7.267%)
PI653432	Chr03	39465057	21222125	21528400	1.18	3728877	306275	1657	251913	0.95153	0	51728	0	2635	254547	51728	0(0.0%)	48999(94.724%)	2418(4.674%)	0(0.0%)	0(0.0%)	0(0.0%)	39158782	17596236	1184319(6.53%)	6751161(37.225%)	2544508(14.03%)	2788633(15.376%)	1067225(5.885%)	1121841(6.186%)
PI653432	Chr04	37721353	10559180	10724997	2.56	3728877	165817	447	69571	0.969557	0	93317	0	2930	72500	93317	0(0.0%)	77473(83.02%)	15686(16.809%)	0(0.0%)	0(0.0%)	160(0.171%)	37555536	21403626	1166576(5.352%)	10498208(48.16%)	2644299(12.131%)	2401728(11.018%)	746955(3.427%)	2174925(9.977%)
PI653432	Chr05	31255663	12513117	12636000	1.49	3728877	122883	742	115402	0.992114	0	7423	0	59	115460	7423	0(0.0%)	7423(100.0%)	0(0.0%)	0(0.0%)	0(0.0%)	0(0.0%)	31132780	16234680	941301(5.554%)	7373917(43.511%)	2112320(12.464%)	2069903(12.214%)	805536(4.753%)	1294596(7.639%)
PI653432	Chr06	32847354	16028433	16120790	1.04	3728877	92357	452	64460	0.896229	0	25003	0	2895	67354	25003	0(0.0%)	17720(70.871%)	6274(25.093%)	0(0.0%)	0(0.0%)	0(0.0%)	32754997	17780601	1076094(5.914%)	7683285(42.226%)	2413251(13.263%)	2444191(13.433%)	839088(4.612%)	1509580(8.296%)
PI653432	Chr07	30718973	12968736	13473570	1.33	3728877	504834	3179	491437	0.975892	0	13075	0	323	491759	13075	0(0.0%)	13075(100.0%)	0(0.0%)	0(0.0%)	0(0.0%)	0(0.0%)	30214139	16312066	1107759(6.642%)	7218401(43.28%)	2227038(13.353%)	2130037(12.771%)	718420(4.308%)	1203413(7.215%)
PI653432	Chr08	32343940	14300399	14415625	1.25	3728877	115226	412	62964	0.86258	0	45081	0	7182	70145	45081	0(0.0%)	21550(47.803%)	22918(50.837%)	0(0.0%)	0(0.0%)	0(0.0%)	32228714	18490852	1042889(5.287%)	9124825(46.262%)	2260377(11.46%)	2087528(10.584%)	751733(3.811%)	1586499(8.043%)
PI653432	Chr09	25493339	3261862	3466900	6.75	3728877	205038	708	115930	0.924115	0	82347	0	6762	122691	82347	0(0.0%)	74810(90.847%)	1257(1.526%)	0(0.0%)	0(0.0%)	6216(7.549%)	25288301	14272507	831656(5.613%)	6490606(43.804%)	1956843(13.206%)	1623080(10.954%)	642723(4.338%)	1148529(7.751%)
PI653432	Chr10	26103850	9232039	9451286	1.8	3728877	219247	491	81257	0.84712	950	116895	0	20146	102352	116895	3875(3.311%)	65952(56.354%)	28301(24.182%)	6443(5.505%)	0(0.0%)	8423(7.197%)	25884603	15285817	889296(5.619%)	7181756(45.377%)	2138861(13.514%)	1829793(11.561%)	565252(3.571%)	1243389(7.856%)
PI653432	Chr11	34166485	13472624	13832549	1.51	3728877	359925	1026	159683	0.916422	1470	183507	0	15266	176510	183507	0(0.0%)	141396(77.052%)	38051(20.735%)	820(0.447%)	172(0.094%)	1680(0.915%)	33806560	21042401	1210943(5.611%)	9687297(44.89%)	3085528(14.298%)	2322349(10.762%)	833446(3.862%)	2225955(10.315%)
PI653432	Chr12	27567015	11007274	11465623	1.46	3728877	458349	953	149276	0.877677	8288	271267	0	29519	187335	271267	0(0.0%)	231872(82.737%)	32575(11.623%)	8663(3.091%)	3689(1.316%)	194(0.069%)	27108666	15153594	1017441(6.339%)	6491686(40.448%)	2333696(14.541%)	1682435(10.483%)	601451(3.748%)	1581214(9.852%)
PI653439	Chr01	44496494	17003081	17950420	1.56	4876465	947339	4089	647803	0.919386	0	275390	0	24147	671949	275390	0(0.0%)	207612(75.388%)	61745(22.421%)	1486(0.54%)	0(0.0%)	0(0.0%)	43549155	19328714	1014832(5.096%)	6694513(33.615%)	3251256(16.325%)	3221221(16.174%)	1225033(6.151%)	1453301(7.297%)
PI653439	Chr02	37460812	13874166	14413535	1.66	4876465	539369	3061	476532	0.931156	0	58512	0	4326	480857	58512	0(0.0%)	35596(60.835%)	22916(39.165%)	0(0.0%)	0(0.0%)	0(0.0%)	36921443	17281693	941469(5.296%)	6551675(36.858%)	2698440(15.181%)	2683188(15.095%)	972539(5.471%)	1255187(7.061%)
PI653439	Chr03	39231028	21004774	21607596	1.19	4876465	602822	2672	408787	0.835453	0	162108	0	31928	440714	162108	2529(1.56%)	112415(69.323%)	39055(24.084%)	1038(0.64%)	4317(2.662%)	1038(0.64%)	38628206	17209495	1094308(6.17%)	6653488(37.515%)	2450450(13.817%)	2739976(15.449%)	1059760(5.975%)	1104887(6.23%)
PI653439	Chr04	35759840	9411585	9436720	2.8	4876465	25135	101	15874	0.928957	0	8604	0	658	16531	8604	0(0.0%)	7775(90.365%)	829(9.635%)	0(0.0%)	0(0.0%)	0(0.0%)	35734705	19904291	1187111(5.852%)	9430578(46.493%)	2597976(12.808%)	2245018(11.068%)	739051(3.644%)	2024389(9.98%)
PI653439	Chr05	31913573	12792728	13149256	1.47	4876465	356528	1692	267470	0.948439	0	84467	0	4592	272061	84467	0(0.0%)	63448(75.116%)	21019(24.884%)	0(0.0%)	0(0.0%)	0(0.0%)	31557045	16452093	980909(5.611%)	7637170(43.683%)	2084480(11.923%)	2153849(12.32%)	791790(4.529%)	1189221(6.802%)
PI653439	Chr06	31443791	14692874	15397431	1.09	4876465	704557	4350	671365	0.964691	0	32021	0	1172	672536	32021	0(0.0%)	32021(100.0%)	0(0.0%)	0(0.0%)	0(0.0%)	0(0.0%)	30739234	15931874	1042733(6.389%)	6117958(37.484%)	2266582(13.887%)	2409770(14.764%)	804711(4.93%)	1481697(9.078%)
PI653439	Chr07	31452056	13643496	13951661	1.28	4876465	308165	1550	240550	0.973231	0	65806	0	1810	242359	65806	0(0.0%)	64284(97.687%)	908(1.38%)	289(0.439%)	0(0.0%)	0(0.0%)	31143891	16989930	1100357(6.277%)	7920697(45.183%)	2247375(12.82%)	2083801(11.887%)	696880(3.975%)	1230757(7.021%)
PI653439	Chr08	29829095	13149050	13404568	1.25	4876465	255518	920	139739	0.842451	414	97539	0	17827	158062	97539	167(0.171%)	65220(66.827%)	23190(23.761%)	1093(1.12%)	29(0.03%)	4148(4.25%)	29573577	16850207	1035632(6.024%)	7725130(44.932%)	2159647(12.561%)	2082576(12.113%)	734826(4.274%)	1540796(8.962%)
PI653439	Chr09	23959853	2751243	3052741	7.6	4876465	301498	878	143823	0.962581	0	151776	0	5900	149722	151776	6469(4.262%)	134255(88.456%)	457(0.301%)	779(0.513%)	1138(0.75%)	8356(5.505%)	23658355	12766899	835237(6.298%)	5320855(40.119%)	2012792(15.176%)	1601832(12.078%)	606460(4.573%)	1115346(8.41%)
PI653439	Chr10	25221641	9133687	9506588	1.72	4876465	372901	804	127316	0.880856	1369	216326	0	27891	156575	216326	2998(1.384%)	150968(69.685%)	51521(23.782%)	6493(2.997%)	0(0.0%)	1955(0.902%)	24848740	14433838	873436(5.837%)	6407909(42.821%)	2016693(13.477%)	1786003(11.935%)	581187(3.884%)	1362574(9.105%)
PI653439	Chr11	28861260	10141432	10463579	1.81	4876465	322147	1023	159028	0.919722	1470	150025	0	11625	172122	150025	0(0.0%)	114066(76.031%)	32055(21.366%)	822(0.548%)	172(0.115%)	1778(1.185%)	28539113	17316686	1034756(5.802%)	7653717(42.916%)	2639076(14.798%)	1870662(10.489%)	668732(3.75%)	1944216(10.902%)
PI653439	Chr12	27434528	11830370	11970856	1.31	4876465	140486	495	77818	0.981203	0	61491	0	1178	78995	61491	0(0.0%)	42245(68.701%)	19246(31.299%)	0(0.0%)	0(0.0%)	0(0.0%)	27294042	15584640	1169098(7.25%)	6572280(40.757%)	2392148(14.835%)	1747983(10.84%)	594620(3.687%)	1652737(10.249%)
Pulut-Hitam-2	Chr01	44523135	17337179	17979512	1.53	5093276	642333	2464	387329	0.586745	852	149623	0	104530	492767	149623	0(0.0%)	124538(83.235%)	15989(10.686%)	4064(2.716%)	0(0.0%)	3322(2.22%)	43880802	19743804	1135981(5.587%)	6468405(31.815%)	3399018(16.718%)	3439867(16.919%)	1230842(6.054%)	1543165(7.59%)
Pulut-Hitam-2	Chr02	36468077	13566572	14069644	1.65	5093276	503072	2870	449126	0.666135	0	35936	0	18011	467136	35936	0(0.0%)	22091(61.473%)	13357(37.169%)	0(0.0%)	0(0.0%)	0(0.0%)	35965005	16333010	1068084(6.346%)	5319301(31.604%)	2698475(16.033%)	2719887(16.16%)	949460(5.641%)	1389456(8.255%)
Pulut-Hitam-2	Chr03	38764138	20901324	21283352	1.2	5093276	382028	1680	255702	0.934638	143	118070	0	8114	263958	118070	0(0.0%)	73637(62.367%)	43777(37.077%)	656(0.556%)	0(0.0%)	0(0.0%)	38382110	16892632	1180595(6.776%)	6181351(35.48%)	2459025(14.115%)	2780021(15.957%)	1044267(5.994%)	1137759(6.531%)
Pulut-Hitam-2	Chr04	33829123	7832481	8355936	3.25	5093276	523455	3299	514579	0.913034	0	8105	0	772	515350	8105	0(0.0%)	355(4.38%)	7750(95.62%)	0(0.0%)	0(0.0%)	0(0.0%)	33305668	17322399	1175131(6.633%)	7082577(39.98%)	2592869(14.636%)	2234400(12.613%)	749138(4.229%)	1732620(9.78%)
Pulut-Hitam-2	Chr05	30904324	12401055	12485638	1.49	5093276	84583	537	84024	0.833929	0	467	0	93	84116	467	0(0.0%)	467(100.0%)	0(0.0%)	0(0.0%)	0(0.0%)	0(0.0%)	30819741	16218646	1009990(6.025%)	7226970(43.114%)	2051261(12.237%)	2188779(13.058%)	812113(4.845%)	1299231(7.751%)
Pulut-Hitam-2	Chr06	31862115	15045386	15966285	1.06	5093276	920899	5883	908180	0.972013	0	12364	0	356	908535	12364	0(0.0%)	12364(100.0%)	0(0.0%)	0(0.0%)	0(0.0%)	0(0.0%)	30941216	15944556	1008794(6.083%)	5954051(35.901%)	2282577(13.763%)	2434812(14.681%)	843363(5.085%)	1596709(9.628%)
Pulut-Hitam-2	Chr07	29863659	12339360	12422252	1.41	5093276	82892	492	78682	0.633579	0	2668	0	1543	80224	2668	0(0.0%)	2668(100.0%)	0(0.0%)	0(0.0%)	0(0.0%)	0(0.0%)	29780767	15814431	1153061(7.133%)	6270118(38.787%)	2388186(14.773%)	2214972(13.702%)	701347(4.338%)	1373293(8.495%)
Pulut-Hitam-2	Chr08	28931624	13088615	13157920	1.21	5093276	69305	41	5237	0.763942	0	48945	0	15124	20402	48945	167(0.341%)	39331(80.354%)	2553(5.216%)	1526(3.118%)	0(0.0%)	4244(8.671%)	28862319	16175697	952093(5.768%)	7047455(42.692%)	2155351(13.057%)	2161367(13.093%)	757536(4.589%)	1525364(9.24%)
Pulut-Hitam-2	Chr09	23305308	3185475	3546878	6.2	5093276	361403	2160	351411	0.868808	0	8682	0	1311	352721	8682	0(0.0%)	8682(100.0%)	0(0.0%)	0(0.0%)	0(0.0%)	0(0.0%)	22943905	12298713	866232(6.871%)	4827077(38.286%)	1932929(15.331%)	1603197(12.716%)	605814(4.805%)	1179367(9.354%)
Pulut-Hitam-2	Chr10	24798067	8861071	8929987	1.79	5093276	68916	315	50455	0.916477	0	16920	0	1542	51996	16920	0(0.0%)	16036(94.775%)	884(5.225%)	0(0.0%)	0(0.0%)	0(0.0%)	24729151	14608344	909563(6.11%)	6631483(44.544%)	2040020(13.703%)	1769285(11.884%)	578776(3.888%)	1275543(8.568%)
Pulut-Hitam-2	Chr11	31810087	12077860	13090371	1.55	5093276	1012511	5880	929375	0.853278	3134	70939	0	9064	941664	70939	0(0.0%)	49814(67.511%)	21446(29.065%)	2151(2.915%)	172(0.233%)	0(0.0%)	30797576	17922963	1247147(6.83%)	6640635(36.37%)	3088894(16.917%)	2152450(11.789%)	780812(4.276%)	2325239(12.735%)
Pulut-Hitam-2	Chr12	27819264	11567951	12009830	1.37	5093276	441879	1281	198895	0.856374	2453	208086	0	32446	233879	208086	0(0.0%)	184349(88.577%)	10519(5.054%)	6982(3.355%)	1808(0.869%)	62(0.03%)	27377385	15715914	1185074(7.392%)	6425876(40.082%)	2511687(15.667%)	1728612(10.782%)	584463(3.646%)	1747910(10.903%)
SL001	Chr01	43850071	16654489	17339276	1.59	4603597	684787	2818	443649	0.651836	852	157183	0	83104	527661	157183	0(0.0%)	132082(84.031%)	15989(10.172%)	4081(2.596%)	0(0.0%)	3321(2.113%)	43165284	19119656	1084178(5.498%)	5995580(30.403%)	3339725(16.935%)	3371622(17.097%)	1222948(6.201%)	1597234(8.099%)
SL001	Chr02	36196690	13585430	14129000	1.62	4603597	543570	3122	488651	0.696413	0	38247	0	16673	505323	38247	0(0.0%)	24402(63.801%)	13357(34.923%)	0(0.0%)	0(0.0%)	0(0.0%)	35653120	16049602	1055451(6.382%)	5039729(30.475%)	2745765(16.603%)	2719718(16.446%)	943585(5.706%)	1355688(8.198%)
SL001	Chr03	37734925	20020645	20429174	1.16	4603597	408529	2425	374432	0.976656	0	33302	0	796	375227	33302	0(0.0%)	26501(79.578%)	6801(20.422%)	0(0.0%)	0(0.0%)	0(0.0%)	37326396	15885848	1194999(7.275%)	5370013(32.691%)	2391105(14.556%)	2724182(16.584%)	1047069(6.374%)	1064086(6.478%)
SL001	Chr04	33897223	8122692	8422191	3.14	4603597	299499	1920	298808	0.518786	0	359	0	333	299140	359	0(0.0%)	359(100.0%)	0(0.0%)	0(0.0%)	0(0.0%)	0(0.0%)	33597724	17653933	1201403(6.66%)	7282328(40.368%)	2585702(14.333%)	2300541(12.753%)	752013(4.169%)	1797828(9.966%)
SL001	Chr05	30029108	12426207	12500429	1.41	4603597	74222	473	73725	0.937751	0	467	0	31	73755	467	0(0.0%)	467(100.0%)	0(0.0%)	0(0.0%)	0(0.0%)	0(0.0%)	29954886	15547207	1001935(6.293%)	6511673(40.901%)	2058915(12.933%)	2191531(13.766%)	805016(5.056%)	1362287(8.557%)
SL001	Chr06	31536913	15341738	15454974	1.05	4603597	113236	491	73725	0.875835	0	34606	0	4906	78630	34606	0(0.0%)	18623(53.814%)	14972(43.264%)	0(0.0%)	0(0.0%)	0(0.0%)	31423677	16417609	1056808(6.207%)	6536285(38.389%)	2316478(13.605%)	2374038(13.943%)	842424(4.948%)	1466594(8.614%)
SL001	Chr07	30475707	12611473	12942703	1.39	4603597	331230	1963	318634	0.923156	0	11629	0	968	319601	11629	0(0.0%)	11629(100.0%)	0(0.0%)	0(0.0%)	0(0.0%)	0(0.0%)	30144477	15784370	1144663(6.935%)	6267146(37.972%)	2332295(14.131%)	2178523(13.199%)	723501(4.384%)	1396688(8.462%)
SL001	Chr08	28807649	13136437	13140933	1.19	4603597	4496	29	4497	#DIV/0!	0	0	0	0	0	0	0	0	0	0	0	0	28803153	15948441	1035765(6.354%)	6573283(40.324%)	2193316(13.455%)	2160267(13.252%)	759007(4.656%)	1616005(9.913%)
SL001	Chr09	23219746	2727666	3632207	7.18	4603597	904541	5615	904496	0	0	0	0	46	0	0	0	0	0	0	0	0	22315205	11744309	862677(7.157%)	4225073(35.054%)	1954090(16.213%)	1575900(13.075%)	622311(5.163%)	1224371(10.158%)
SL001	Chr10	25209580	9152502	9210955	1.75	4603597	58453	236	38141	0.83897	0	17042	0	3271	41411	17042	0(0.0%)	16134(94.672%)	908(5.328%)	0(0.0%)	0(0.0%)	0(0.0%)	25151127	14909499	924935(6.087%)	6816901(44.861%)	2108644(13.877%)	1806173(11.886%)	572808(3.77%)	1253716(8.251%)
SL001	Chr11	30601850	12389319	13125780	1.41	4603597	736461	4084	643362	0.891214	3134	82972	0	6994	653581	82972	0(0.0%)	63456(73.941%)	19672(22.922%)	2151(2.506%)	172(0.2%)	0(0.0%)	29865389	17346300	1225720(6.938%)	6545131(37.049%)	2944743(16.669%)	2121289(12.008%)	749244(4.241%)	2094373(11.855%)
SL001	Chr12	26911584	11193427	11638000	1.36	4603597	444573	1208	190500	0.819974	10447	208334	0	35293	236368	208334	0(0.0%)	181179(86.598%)	11233(5.369%)	7648(3.656%)	2712(1.296%)	92(0.044%)	26467011	15069890	1121452(7.291%)	6166618(40.089%)	2439533(15.859%)	1684770(10.953%)	570057(3.706%)	1597845(10.388%)
SL010	Chr01	43031551	16852350	17250735	1.53	4440553	398385	1787	279270	0.892626	0	106326	0	12790	292116	106326	0(0.0%)	83157(78.209%)	15989(15.038%)	3216(3.025%)	0(0.0%)	2942(2.767%)	42633166	18557747	1043246(5.447%)	5887370(30.742%)	3204340(16.732%)	3261007(17.028%)	1201083(6.272%)	1475221(7.703%)
SL010	Chr02	38310629	13902271	14671791	1.7	4440553	769520	3539	550416	0.928587	0	203458	0	15647	566062	203458	0(0.0%)	149290(73.376%)	54168(26.624%)	0(0.0%)	0(0.0%)	0(0.0%)	37541109	17903934	992237(5.393%)	7057281(38.356%)	2642113(14.36%)	2754468(14.97%)	966499(5.253%)	1320589(7.177%)
SL010	Chr03	39739335	21312156	21605416	1.18	4440553	293260	1552	236135	0.905682	0	51738	0	5388	241522	51738	0(0.0%)	49009(94.725%)	2418(4.674%)	0(0.0%)	0(0.0%)	0(0.0%)	39446075	17522849	1231617(6.695%)	6771952(36.809%)	2451682(13.326%)	2787420(15.151%)	1056865(5.745%)	1109338(6.03%)
SL010	Chr04	36144628	9295831	9392598	2.88	4440553	96767	346	53865	0.967695	0	41517	0	1386	55250	41517	0(0.0%)	40622(97.84%)	866(2.086%)	0(0.0%)	0(0.0%)	31(0.075%)	36047861	19899779	1144801(5.641%)	9246321(45.564%)	2618258(12.902%)	2330487(11.484%)	748094(3.686%)	2068173(10.192%)
SL010	Chr05	31542938	12512530	12847886	1.49	4440553	335356	1552	244967	0.886337	0	80116	0	10274	255240	80116	0(0.0%)	59597(74.388%)	20519(25.612%)	0(0.0%)	0(0.0%)	0(0.0%)	31207582	16291209	967917(5.684%)	7469234(43.866%)	2081987(12.227%)	2118274(12.44%)	798945(4.692%)	1220359(7.167%)
SL010	Chr06	32942113	16321808	17231506	1.04	4440553	909698	5238	807440	0.845618	0	86472	0	15787	823226	86472	0(0.0%)	66392(76.779%)	16063(18.576%)	0(0.0%)	0(0.0%)	30(0.035%)	32032415	16793203	1093916(6.207%)	7032598(39.906%)	2207397(12.526%)	2351845(13.345%)	800233(4.541%)	1502363(8.525%)
SL010	Chr07	31448978	13521650	13835632	1.3	4440553	313982	1559	241800	0.971974	0	70160	0	2023	243822	70160	0(0.0%)	68638(97.831%)	908(1.294%)	289(0.412%)	0(0.0%)	0(0.0%)	31134996	17137994	1176320(6.728%)	7614011(43.547%)	2311531(13.22%)	2240229(12.813%)	709722(4.059%)	1348814(7.714%)
SL010	Chr08	31507812	13643204	13903219	1.29	4440553	260015	408	61496	0.884112	414	175514	0	22592	84584	175514	167(0.095%)	120525(68.647%)	47034(26.789%)	1090(0.621%)	29(0.017%)	4395(2.503%)	31247797	17682437	1020986(5.435%)	8405837(44.746%)	2283967(12.158%)	2098598(11.171%)	744395(3.963%)	1526531(8.126%)
SL010	Chr09	24751776	3052965	3109920	7.09	4440553	56955	195	31769	0.875134	0	22042	0	3145	34913	22042	0(0.0%)	21978(99.71%)	0(0.0%)	0(0.0%)	0(0.0%)	0(0.0%)	24694821	13565510	786698(5.492%)	5710756(39.869%)	2150496(15.013%)	1619062(11.303%)	612132(4.274%)	1130561(7.893%)
SL010	Chr10	25473597	9109200	9331780	1.77	4440553	222580	475	78413	0.863909	950	124548	0	18670	98065	124548	4113(3.299%)	72504(58.15%)	29362(23.549%)	6443(5.167%)	0(0.0%)	8423(6.755%)	25251017	14947390	906058(5.952%)	6849812(44.994%)	2095960(13.768%)	1802003(11.837%)	567598(3.728%)	1293176(8.494%)
SL010	Chr11	32938070	13164814	13522472	1.47	4440553	357658	1332	207869	0.95704	0	143355	0	6435	214303	143355	0(0.0%)	110504(77.084%)	32268(22.509%)	75(0.052%)	0(0.0%)	0(0.0%)	32580412	20023143	1041838(5.091%)	9230130(45.105%)	2997204(14.647%)	2197250(10.737%)	775757(3.791%)	2109576(10.309%)
SL010	Chr12	26929703	11573113	11999490	1.29	4440553	426377	683	107053	0.835844	11212	266906	0	41207	159650	266906	0(0.0%)	224184(81.053%)	33366(12.063%)	9220(3.333%)	4770(1.725%)	469(0.17%)	26503326	14922859	1205097(7.829%)	6071054(39.443%)	2464195(16.01%)	1670981(10.856%)	580400(3.771%)	1463301(9.507%)
SL019	Chr01	44142011	16950736	17585150	1.57	4115593	634414	2372	373285	0.573224	852	149686	0	110592	484785	149686	0(0.0%)	124576(83.225%)	15989(10.682%)	4098(2.738%)	0(0.0%)	3313(2.213%)	43507597	19446518	1152173(5.75%)	6210463(30.996%)	3342282(16.681%)	3410083(17.019%)	1237628(6.177%)	1527913(7.626%)
SL019	Chr02	36813817	13429607	13971918	1.7	4115593	542311	3128	489826	0.68464	0	35934	0	16552	506377	35934	0(0.0%)	22089(61.471%)	13357(37.171%)	0(0.0%)	0(0.0%)	0(0.0%)	36271506	16612217	1054376(6.166%)	5518359(32.272%)	2771974(16.211%)	2700271(15.791%)	952903(5.573%)	1423238(8.323%)
SL019	Chr03	38099041	20264621	20767914	1.17	4115593	503293	2789	430388	0.748251	0	54552	0	18354	448741	54552	707(1.295%)	40242(73.695%)	5711(10.459%)	1150(2.106%)	4452(8.153%)	1038(1.901%)	37595748	16107370	1213171(7.291%)	5510975(33.12%)	2402011(14.436%)	2756202(16.564%)	1048012(6.298%)	1076981(6.472%)
SL019	Chr04	34121088	8086293	8397717	3.18	4115593	311424	1995	310597	0.42029	0	348	0	480	311076	348	0(0.0%)	348(100.0%)	0(0.0%)	0(0.0%)	0(0.0%)	0(0.0%)	33809664	17799114	1253427(6.894%)	7257332(39.918%)	2657480(14.617%)	2310295(12.707%)	753585(4.145%)	1822618(10.025%)
SL019	Chr05	30783098	12428669	12506904	1.47	4115593	78235	498	77707	0.882798	0	467	0	62	77768	467	0(0.0%)	467(100.0%)	0(0.0%)	0(0.0%)	0(0.0%)	0(0.0%)	30704863	15918639	1045835(6.282%)	6882743(41.341%)	2074643(12.461%)	2163320(12.994%)	812041(4.877%)	1314345(7.895%)
SL019	Chr06	31876026	15275032	15387927	1.08	4115593	112895	501	75394	0.900645	0	33776	0	3726	79119	33776	0(0.0%)	17829(52.786%)	14936(44.221%)	0(0.0%)	0(0.0%)	0(0.0%)	31763131	16914396	1088345(6.288%)	6706667(38.751%)	2364944(13.664%)	2419235(13.978%)	856258(4.947%)	1667846(9.637%)
SL019	Chr07	29939123	12460002	12537923	1.4	4115593	77921	468	74886	0.885046	0	2687	0	349	75234	2687	0(0.0%)	2687(100.0%)	0(0.0%)	0(0.0%)	0(0.0%)	0(0.0%)	29861202	15868032	1138681(7.018%)	6249399(38.516%)	2388531(14.721%)	2263998(13.953%)	713471(4.397%)	1393385(8.588%)
SL019	Chr08	29689510	13165333	13169985	1.25	4115593	4652	30	4653	#DIV/0!	0	0	0	0	0	0	0	0	0	0	0	0	29684858	16900697	1110372(6.441%)	7460707(43.278%)	2215044(12.849%)	2141493(12.422%)	760759(4.413%)	1605710(9.314%)
SL019	Chr09	23623257	3103084	3503506	6.48	4115593	400422	1614	262466	0.843002	5997	116298	0	15662	284173	116298	9496(7.789%)	87213(71.536%)	19485(15.983%)	2249(1.845%)	179(0.147%)	1370(1.124%)	23222835	12608636	919038(7.117%)	5052199(39.125%)	1979652(15.331%)	1548089(11.989%)	609438(4.72%)	1214624(9.406%)
SL019	Chr10	25109796	9106726	9181994	1.75	4115593	75268	346	55105	0.840309	0	16944	0	3220	58324	16944	0(0.0%)	16036(94.641%)	908(5.359%)	0(0.0%)	0(0.0%)	0(0.0%)	25034528	14834759	931967(6.168%)	6777342(44.854%)	2065579(13.671%)	1773264(11.736%)	575047(3.806%)	1283367(8.494%)
SL019	Chr11	30555313	12322397	13253579	1.4	4115593	931182	5680	896252	0.729724	3134	25490	0	6307	905784	25490	0(0.0%)	19935(70.347%)	5988(21.131%)	2151(7.591%)	172(0.607%)	0(0.0%)	29624131	17143848	1195945(6.85%)	6555227(37.547%)	2887023(16.536%)	2079804(11.913%)	730554(4.184%)	2056969(11.782%)
SL019	Chr12	26890653	11219225	11662801	1.36	4115593	443576	1247	196790	0.872688	2453	215368	0	28966	228294	215368	0(0.0%)	191304(88.811%)	10851(5.037%)	6978(3.239%)	1808(0.839%)	62(0.029%)	26447077	15057494	1145428(7.456%)	6157151(40.079%)	2434859(15.849%)	1673017(10.89%)	579280(3.771%)	1591239(10.358%)
SL022	Chr01	44391183	17183093	18096767	1.53	4626752	913674	3958	626594	0.92515	0	265593	0	21488	648081	265593	0(0.0%)	198500(74.738%)	61060(22.99%)	1486(0.56%)	0(0.0%)	0(0.0%)	43477509	19280720	1003902(5.054%)	6595948(33.206%)	3302069(16.624%)	3291992(16.573%)	1212252(6.103%)	1413867(7.118%)
SL022	Chr02	37491655	13830049	14366980	1.67	4626752	536931	3033	472061	0.901728	0	58496	0	6375	478435	58496	0(0.0%)	35571(60.809%)	22925(39.191%)	0(0.0%)	0(0.0%)	0(0.0%)	36954724	17320558	941797(5.287%)	6542697(36.726%)	2662255(14.944%)	2743702(15.401%)	981379(5.509%)	1306803(7.335%)
SL022	Chr03	39167649	20972255	21519898	1.19	4626752	547643	2723	413799	0.937084	0	125424	0	8421	422219	125424	0(0.0%)	91973(73.33%)	33141(26.423%)	0(0.0%)	0(0.0%)	0(0.0%)	38620006	17203499	1053629(5.944%)	6749505(38.075%)	2457000(13.86%)	2655129(14.978%)	1071209(6.043%)	1119995(6.318%)
SL022	Chr04	35445560	9061303	9086437	2.91	4626752	25134	101	15860	0.927655	0	8604	0	671	16530	8604	0(0.0%)	7775(90.365%)	829(9.635%)	0(0.0%)	0(0.0%)	0(0.0%)	35420426	19494452	1172856(5.902%)	9024582(45.41%)	2604551(13.106%)	2271777(11.431%)	747158(3.76%)	1968580(9.906%)
SL022	Chr05	31633524	12832715	13192498	1.44	4626752	359783	1700	268173	0.923765	0	84627	0	6984	275156	84627	0(0.0%)	63609(75.164%)	21018(24.836%)	0(0.0%)	0(0.0%)	0(0.0%)	31273741	16434002	962580(5.607%)	7621290(44.394%)	2088340(12.165%)	2170454(12.643%)	775723(4.519%)	1189520(6.929%)
SL022	Chr06	31460400	14746876	15256525	1.1	4626752	509649	2737	419808	0.844694	438	75889	0	13515	433760	75889	0(0.0%)	35929(47.312%)	38645(50.888%)	616(0.811%)	0(0.0%)	89(0.117%)	30950751	16049806	1073465(6.531%)	6136566(37.335%)	2317393(14.099%)	2415210(14.694%)	811678(4.938%)	1475207(8.975%)
SL022	Chr07	29499428	11945082	12275520	1.44	4626752	330438	1938	284056	0.936464	0	43436	0	2947	287002	43436	0(0.0%)	35257(81.17%)	8179(18.83%)	0(0.0%)	0(0.0%)	0(0.0%)	29168990	15240044	1060757(6.805%)	6174612(39.614%)	2274782(14.594%)	2109121(13.531%)	702293(4.506%)	1220239(7.829%)
SL022	Chr08	30486342	13678758	13808761	1.22	4626752	130003	390	59880	0.9115	0	63918	0	6206	66085	63918	0(0.0%)	40358(63.14%)	22947(35.901%)	0(0.0%)	0(0.0%)	0(0.0%)	30356339	17577464	1071690(5.98%)	8464508(47.228%)	2183729(12.184%)	2060663(11.498%)	751183(4.191%)	1483617(8.278%)
SL022	Chr09	24982594	2819305	2995709	7.8	4626752	176404	784	128708	0.95029	0	45326	0	2371	131078	45326	0(0.0%)	40628(89.635%)	0(0.0%)	0(0.0%)	0(0.0%)	4698(10.365%)	24806190	13678947	864780(5.98%)	5819644(40.242%)	1966452(13.598%)	1583687(10.951%)	613713(4.244%)	1245579(8.613%)
SL022	Chr10	25379142	9297792	9720709	1.68	4626752	422917	1073	171541	0.882503	1369	221841	0	28167	201076	221841	2998(1.349%)	159369(71.737%)	51468(23.167%)	3888(1.75%)	0(0.0%)	1955(0.88%)	24956225	14540448	891080(5.912%)	6555709(43.496%)	2015415(13.372%)	1736801(11.523%)	569844(3.781%)	1355088(8.991%)
SL022	Chr11	32487846	12585093	12989727	1.55	4626752	404634	955	152902	0.900418	1470	226665	0	23598	178186	226665	0(0.0%)	173036(76.34%)	28195(12.439%)	820(0.362%)	172(0.076%)	22211(9.799%)	32083212	19409560	1204474(6.064%)	8473022(42.66%)	2951377(14.86%)	2185201(11.002%)	769920(3.876%)	2139475(10.772%)
SL022	Chr12	27246383	11872033	12141575	1.27	4626752	269542	1144	180700	0.902221	0	80156	0	8687	189386	80156	0(0.0%)	76913(95.952%)	2774(3.461%)	0(0.0%)	0(0.0%)	0(0.0%)	26976841	15456683	1118880(7.044%)	6607768(41.601%)	2379804(14.983%)	1706096(10.741%)	579882(3.651%)	1618502(10.19%)
SL028	Chr01	44055724	17105431	17737998	1.54	5235838	632567	2071	325507	0.485151	0	148971	0	158090	483653	148971	0(0.0%)	124413(83.515%)	15989(10.733%)	3764(2.527%)	0(0.0%)	3165(2.125%)	43423157	19259446	1165268(5.868%)	6015595(30.295%)	3329896(16.769%)	3404414(17.145%)	1225800(6.173%)	1567140(7.892%)
SL028	Chr02	36546673	13546032	14061935	1.66	5235838	515903	2887	449062	0.734688	0	49108	0	17734	466795	49108	0(0.0%)	35263(71.807%)	13357(27.199%)	0(0.0%)	0(0.0%)	0(0.0%)	36030770	16337868	1064999(6.328%)	5191760(30.849%)	2771986(16.471%)	2743035(16.299%)	950006(5.645%)	1409671(8.376%)
SL028	Chr03	37431225	19906766	20382556	1.17	5235838	475790	2859	440924	0.961195	0	33514	0	1353	442276	33514	0(0.0%)	33514(100.0%)	0(0.0%)	0(0.0%)	0(0.0%)	0(0.0%)	36955435	15489993	1300711(8.11%)	4897839(30.538%)	2406741(15.006%)	2723016(16.978%)	1041428(6.493%)	1050176(6.548%)
SL028	Chr04	35622054	9951382	10067934	2.57	5235838	116552	330	51479	0.928589	0	60427	0	4647	56125	60427	0(0.0%)	43202(71.495%)	17193(28.453%)	0(0.0%)	0(0.0%)	32(0.053%)	35505502	19480497	1313260(6.602%)	8666945(43.567%)	2802908(14.09%)	2309483(11.609%)	771573(3.879%)	1903671(9.569%)
SL028	Chr05	30534884	12455110	12567170	1.44	5235838	112060	716	111563	0.937751	0	467	0	31	111593	467	0(0.0%)	467(100.0%)	0(0.0%)	0(0.0%)	0(0.0%)	0(0.0%)	30422824	15657416	1099595(6.711%)	6565640(40.069%)	2060783(12.577%)	2155635(13.156%)	808697(4.935%)	1335270(8.149%)
SL028	Chr06	32482290	15216601	16013094	1.08	5235838	796493	4939	762404	0.964007	0	32863	0	1227	763630	32863	0(0.0%)	27861(84.779%)	4459(13.568%)	0(0.0%)	0(0.0%)	0(0.0%)	31685797	16511765	1155536(6.729%)	6210161(36.165%)	2316425(13.49%)	2413750(14.057%)	836152(4.869%)	1730791(10.079%)
SL028	Chr07	29745430	12194616	12402824	1.42	5235838	208208	1234	199080	0.915434	0	8357	0	772	199851	8357	0(0.0%)	8357(100.0%)	0(0.0%)	0(0.0%)	0(0.0%)	0(0.0%)	29537222	15507470	1161718(7.32%)	5963781(37.578%)	2348189(14.796%)	2166315(13.65%)	730159(4.601%)	1383327(8.716%)
SL028	Chr08	29712472	13314539	13319191	1.23	5235838	4652	30	4653	#DIV/0!	0	0	0	0	0	0	0	0	0	0	0	0	29707820	16840031	1130811(6.581%)	7310805(42.544%)	2243126(13.054%)	2140410(12.456%)	755751(4.398%)	1653137(9.62%)
SL028	Chr09	23443408	2772345	3223416	7.29	5235838	451071	2782	446354	0.927724	0	4377	0	341	446694	4377	0(0.0%)	4377(100.0%)	0(0.0%)	0(0.0%)	0(0.0%)	0(0.0%)	22992337	12274972	878976(6.961%)	4560893(36.117%)	2006751(15.891%)	1622246(12.846%)	638141(5.053%)	1260774(9.984%)
SL028	Chr10	24598278	9160762	9271306	1.67	5235838	110544	611	100052	0.916706	0	9619	0	874	100925	9619	0(0.0%)	8762(91.091%)	857(8.909%)	0(0.0%)	0(0.0%)	0(0.0%)	24487734	14449345	929178(6.305%)	6372493(43.244%)	2122746(14.405%)	1786944(12.126%)	582013(3.95%)	1234784(8.379%)
SL028	Chr11	29353713	12135315	13235996	1.33	5235838	1100681	6381	1007625	0.883759	3134	82240	0	7683	1018533	82240	0(0.0%)	46604(54.772%)	36069(42.39%)	2151(2.528%)	172(0.202%)	0(0.0%)	28253032	15980469	1221541(7.494%)	5709332(35.024%)	2750242(16.871%)	2083870(12.783%)	719992(4.417%)	1905325(11.688%)
SL028	Chr12	27721275	11220229	11931546	1.41	5235838	711317	3335	513771	0.788172	11073	155701	0	30773	555866	155701	0(0.0%)	120855(71.232%)	21232(12.514%)	9079(5.351%)	13254(7.812%)	467(0.275%)	27009958	15395591	1334751(8.494%)	5914072(37.634%)	2582973(16.436%)	1752629(11.153%)	594479(3.783%)	1656839(10.543%)
SL032	Chr01	43816860	16766751	17471174	1.57	6135621	704423	2723	427783	0.566879	852	156822	0	118967	547658	156822	0(0.0%)	131700(83.981%)	16010(10.209%)	4088(2.607%)	0(0.0%)	3314(2.113%)	43112437	19075771	1134265(5.765%)	5888749(29.928%)	3368751(17.121%)	3353649(17.044%)	1228301(6.243%)	1566472(7.961%)
SL032	Chr02	36661241	13587299	14163494	1.66	6135621	576195	3356	522873	0.673949	0	35937	0	17386	540258	35937	0(0.0%)	22092(61.474%)	13357(37.168%)	0(0.0%)	0(0.0%)	0(0.0%)	36085046	16495414	1067772(6.284%)	5320361(31.313%)	2755607(16.218%)	2748540(16.177%)	949827(5.59%)	1435385(8.448%)
SL032	Chr03	37894767	20102077	20504757	1.16	6135621	402680	2414	372839	0.973025	0	29037	0	805	373643	29037	0(0.0%)	29037(100.0%)	0(0.0%)	0(0.0%)	0(0.0%)	0(0.0%)	37492087	16009276	1225865(7.409%)	5417066(32.738%)	2415771(14.6%)	2717819(16.425%)	1047704(6.332%)	1092426(6.602%)
SL032	Chr04	35015699	9818509	9934321	2.55	6135621	115812	328	51153	0.934395	0	60418	0	4242	55394	60418	0(0.0%)	43194(71.492%)	17192(28.455%)	0(0.0%)	0(0.0%)	32(0.053%)	34899887	18917066	1258705(6.514%)	8340213(43.164%)	2748269(14.223%)	2312310(11.967%)	766744(3.968%)	1767361(9.147%)
SL032	Chr05	29859770	12008003	12225493	1.47	6135621	217490	1275	196790	0.765953	0	15856	0	4845	201634	15856	652(4.112%)	15204(95.888%)	0(0.0%)	0(0.0%)	0(0.0%)	0(0.0%)	29642280	14407519	1021570(6.765%)	5413705(35.848%)	2021015(13.383%)	2167952(14.356%)	803904(5.323%)	1341308(8.882%)
SL032	Chr06	32278233	15479053	16225401	1.04	6135621	746348	4808	741835	0.961232	0	4339	0	175	742009	4339	0(0.0%)	4339(100.0%)	0(0.0%)	0(0.0%)	0(0.0%)	0(0.0%)	31531885	16419433	1070088(6.283%)	6036444(35.443%)	2361122(13.863%)	2464663(14.471%)	852086(5.003%)	1799944(10.568%)
SL032	Chr07	29438093	11904687	12136908	1.45	6135621	232221	1344	217308	0.861405	0	12847	0	2067	219374	12847	0(0.0%)	12847(100.0%)	0(0.0%)	0(0.0%)	0(0.0%)	0(0.0%)	29205872	15281046	1136758(7.273%)	5892289(37.698%)	2312484(14.795%)	2144705(13.721%)	735002(4.702%)	1331358(8.518%)
SL032	Chr08	28485914	12995314	13130429	1.18	6135621	135115	344	52834	0.805729	414	66297	0	15571	68901	66297	167(0.25%)	54044(81.063%)	5849(8.773%)	1093(1.639%)	492(0.738%)	3401(5.101%)	28350799	15546716	1038536(6.535%)	6142801(38.652%)	2315637(14.571%)	2069353(13.021%)	741040(4.663%)	1632483(10.272%)
SL032	Chr09	23602593	2816154	3398023	7.17	6135621	581869	2932	470662	0.806066	5701	89641	0	15866	492277	89641	0(0.0%)	70564(74.065%)	18820(19.754%)	2112(2.217%)	180(0.189%)	1252(1.314%)	23020724	12268346	847033(6.716%)	4585854(36.363%)	1989958(15.779%)	1634618(12.961%)	638346(5.062%)	1266455(10.042%)
SL032	Chr10	24082600	8493137	8823835	1.8	6135621	330698	1781	289985	0.983445	0	40040	0	674	290658	40040	0(0.0%)	24634(61.523%)	15406(38.477%)	0(0.0%)	0(0.0%)	0(0.0%)	23751902	13727603	952479(6.8%)	5539131(39.544%)	2171838(15.505%)	1755565(12.533%)	569569(4.066%)	1268591(9.057%)
SL032	Chr11	31780851	12873004	14298539	1.36	6135621	1425535	8334	1315176	0.908789	3134	100294	100	6832	1325333	100294	0(0.0%)	82584(80.068%)	17913(17.367%)	2151(2.085%)	172(0.167%)	0(0.0%)	30355316	17671708	1197207(6.648%)	6556854(36.408%)	3094663(17.184%)	2252732(12.509%)	782875(4.347%)	2076173(11.528%)
SL032	Chr12	27529624	11058262	11725497	1.43	6135621	667235	3025	468304	0.796332	11582	158416	0	28934	509069	158416	0(0.0%)	121088(71.365%)	21777(12.835%)	9252(5.453%)	12315(7.258%)	465(0.274%)	26862389	15270592	1314375(8.434%)	5786251(37.127%)	2587878(16.605%)	1750312(11.231%)	595331(3.82%)	1676312(10.756%)
SL039	Chr01	44167577	16991044	17724613	1.56	5030722	733569	2824	445883	0.599356	852	172427	0	114408	561229	172427	0(0.0%)	145932(84.634%)	15970(9.262%)	4628(2.684%)	0(0.0%)	3539(2.052%)	43434008	19315584	1149859(5.773%)	6087282(30.561%)	3391297(17.026%)	3394392(17.041%)	1237271(6.212%)	1518644(7.624%)
SL039	Chr02	36773795	13653014	14226961	1.65	5030722	573947	3100	485459	0.605307	0	53563	0	34926	520384	53563	0(0.0%)	39718(74.152%)	13357(24.937%)	0(0.0%)	0(0.0%)	0(0.0%)	36199848	16572348	1059817(6.209%)	5303346(31.072%)	2784823(16.316%)	2763525(16.192%)	963472(5.645%)	1509018(8.841%)
SL039	Chr03	38615139	21073166	21450961	1.23	5030722	377795	1633	248545	0.941223	143	121654	0	7454	256141	121654	0(0.0%)	77220(63.475%)	43778(35.986%)	656(0.539%)	0(0.0%)	0(0.0%)	38237344	16660742	1187430(6.908%)	5910105(34.382%)	2538075(14.765%)	2740286(15.941%)	1051140(6.115%)	1120218(6.517%)
SL039	Chr04	33721178	7814866	8130724	3.27	5030722	315858	1750	272485	0.974247	0	42257	0	1117	273601	42257	0(0.0%)	26751(63.305%)	15506(36.695%)	0(0.0%)	0(0.0%)	0(0.0%)	33405320	17444518	1236158(6.932%)	7145505(40.068%)	2544872(14.27%)	2290611(12.844%)	745334(4.179%)	1751914(9.824%)
SL039	Chr05	31427306	12921133	13014831	1.42	5030722	93698	568	88722	0.976894	0	4862	0	115	88836	4862	0(0.0%)	4862(100.0%)	0(0.0%)	0(0.0%)	0(0.0%)	0(0.0%)	31333608	16448422	1051585(6.081%)	7442174(43.038%)	2092880(12.103%)	2171824(12.56%)	822046(4.754%)	1249471(7.226%)
SL039	Chr06	32223589	14926414	15781886	1.1	5030722	855472	5541	855192	0	0	0	0	281	0	0	0	0	0	0	0	0	31368117	16298864	1089154(6.442%)	6198227(36.663%)	2300406(13.607%)	2380170(14.079%)	831152(4.916%)	1665093(9.849%)
SL039	Chr07	29829870	12207402	12424608	1.43	5030722	217206	1262	203907	0.962707	0	12804	0	496	204402	12804	0(0.0%)	12804(100.0%)	0(0.0%)	0(0.0%)	0(0.0%)	0(0.0%)	29612664	15529191	1126280(7.073%)	6077099(38.162%)	2299922(14.443%)	2214533(13.906%)	709012(4.452%)	1356613(8.519%)
SL039	Chr08	30016077	13558386	13628777	1.21	5030722	70391	391	60386	0.926444	0	9270	0	736	61121	9270	0(0.0%)	7626(82.265%)	1031(11.122%)	0(0.0%)	0(0.0%)	0(0.0%)	29945686	17091603	1075841(6.169%)	7631214(43.761%)	2208128(12.662%)	2095301(12.015%)	764021(4.381%)	1686334(9.67%)
SL039	Chr09	23172421	3052056	3340458	6.5	5030722	288402	1724	280309	0.904744	0	7323	0	771	281079	7323	0(0.0%)	7323(100.0%)	0(0.0%)	0(0.0%)	0(0.0%)	0(0.0%)	22884019	12283884	844474(6.699%)	4827195(38.295%)	1951597(15.482%)	1612859(12.795%)	608743(4.829%)	1162195(9.22%)
SL039	Chr10	24193738	8791819	8893625	1.74	5030722	101806	284	46439	0.721572	1527	39952	0	13889	62038	39952	769(1.904%)	26287(65.076%)	5154(12.759%)	4819(11.93%)	0(0.0%)	1521(3.765%)	24091932	13979395	920560(6.456%)	5994612(42.041%)	2087225(14.638%)	1736838(12.181%)	577275(4.049%)	1247642(8.75%)
SL039	Chr11	30986749	13313750	14212651	1.26	5030722	898901	5474	864074	0.731825	3134	25488	0	6206	873505	25488	0(0.0%)	19933(70.345%)	5988(21.132%)	2151(7.591%)	172(0.607%)	0(0.0%)	30087848	17626357	1216222(6.777%)	6976713(38.874%)	2863212(15.954%)	2154035(12.002%)	731964(4.079%)	2003179(11.162%)
SL039	Chr12	28196633	11257284	11760961	1.46	5030722	503677	1345	212476	0.761008	17398	221607	0	52197	282284	221607	0(0.0%)	188681(83.639%)	12099(5.363%)	8978(3.98%)	5455(2.418%)	152(0.067%)	27692956	16128744	1222322(7.432%)	6769832(41.163%)	2569408(15.623%)	1716964(10.44%)	600998(3.654%)	1708917(10.391%)
SL044	Chr01	44783739	17060001	17782947	1.58	3809385	722946	3340	524850	0.740566	0	146704	0	51393	576242	146704	0(0.0%)	117462(80.067%)	27611(18.821%)	749(0.511%)	0(0.0%)	0(0.0%)	44060793	19944691	1020021(4.968%)	7138590(34.766%)	3254284(15.849%)	3315845(16.149%)	1221876(5.951%)	1506154(7.335%)
SL044	Chr02	38362647	13924932	14395943	1.72	3809385	471011	2660	413860	0.928314	0	53055	0	4097	417956	53055	0(0.0%)	39489(74.43%)	13566(25.57%)	0(0.0%)	0(0.0%)	0(0.0%)	37891636	18123043	1000490(5.375%)	7138009(38.348%)	2701931(14.516%)	2755428(14.803%)	974633(5.236%)	1421981(7.639%)
SL044	Chr03	39854296	21119110	21500468	1.15	3809385	381358	1672	254441	0.810098	0	102816	0	24102	278542	102816	2527(2.456%)	83714(81.378%)	8330(8.098%)	1038(1.009%)	4452(4.328%)	1038(1.009%)	39472938	17691371	1157282(6.257%)	7060143(38.174%)	2453728(13.267%)	2801467(15.148%)	1045615(5.654%)	1067260(5.771%)
SL044	Chr04	36178636	9682621	9778897	2.73	3809385	96276	330	51348	0.923502	0	41492	0	3437	54784	41492	0(0.0%)	40597(97.838%)	866(2.087%)	0(0.0%)	0(0.0%)	31(0.075%)	36082360	20104402	1160699(5.665%)	9275713(45.275%)	2705179(13.204%)	2312804(11.289%)	739268(3.608%)	2196990(10.723%)
SL044	Chr05	31159463	12523108	12627265	1.48	3809385	104157	663	103630	0.878788	0	464	0	64	103693	464	0(0.0%)	464(100.0%)	0(0.0%)	0(0.0%)	0(0.0%)	0(0.0%)	31055306	16198319	987198(5.857%)	7362164(43.679%)	2089501(12.397%)	2071912(12.292%)	817747(4.852%)	1223863(7.261%)
SL044	Chr06	32331848	15525067	15649946	1.07	3809385	124879	707	102437	0.921936	0	20691	0	1752	104188	20691	0(0.0%)	13399(64.758%)	6283(30.366%)	0(0.0%)	0(0.0%)	0(0.0%)	32206969	17324975	1054578(5.951%)	7380042(41.648%)	2326348(13.128%)	2457482(13.868%)	826792(4.666%)	1452148(8.195%)
SL044	Chr07	30322771	12545052	13006755	1.38	3809385	461703	2921	451621	0.94823	0	9561	0	522	452142	9561	0(0.0%)	8712(91.12%)	849(8.88%)	0(0.0%)	0(0.0%)	0(0.0%)	29861068	15917597	1123823(6.908%)	6700454(41.185%)	2245813(13.804%)	2153470(13.237%)	705830(4.338%)	1273745(7.829%)
SL044	Chr08	30680809	13048154	13305915	1.33	3809385	257761	390	58834	0.881962	0	175447	0	23481	82397	175447	167(0.095%)	120567(68.571%)	47283(26.891%)	1090(0.62%)	163(0.093%)	4395(2.5%)	30423048	16970369	1011825(5.63%)	7769330(43.228%)	2259808(12.573%)	2072329(11.53%)	743049(4.134%)	1499394(8.343%)
SL044	Chr09	24622458	3072022	3264375	6.95	3809385	192353	628	102773	0.925174	0	82878	0	6703	109475	82878	0(0.0%)	76599(92.424%)	0(0.0%)	0(0.0%)	0(0.0%)	6215(7.499%)	24430105	13606911	839176(5.937%)	6057411(42.854%)	1896866(13.42%)	1563172(11.059%)	615301(4.353%)	1089756(7.71%)
SL044	Chr10	26487272	9648488	9782704	1.73	3809385	134216	343	56086	0.804137	1830	62828	0	13473	71388	62828	3680(5.807%)	35620(56.204%)	14171(22.36%)	5924(9.347%)	0(0.0%)	1436(2.266%)	26353056	15727395	858605(5.266%)	7632794(46.81%)	2139517(13.121%)	1861227(11.414%)	551343(3.381%)	1255741(7.701%)
SL044	Chr11	31288238	12304419	12664346	1.51	3809385	359927	960	150059	0.921689	1470	193434	0	14965	166585	193434	0(0.0%)	151320(78.228%)	38039(19.665%)	822(0.425%)	172(0.089%)	1680(0.869%)	30928311	19020423	1120141(5.742%)	8413061(43.123%)	2988610(15.319%)	2198683(11.27%)	765249(3.922%)	1940565(9.947%)
SL044	Chr12	27893602	11133562	11636360	1.46	3809385	502798	955	146151	0.869291	9826	310031	0	36791	192716	310031	0(0.0%)	251703(78.641%)	39692(12.401%)	9066(2.833%)	4176(1.305%)	11708(3.658%)	27390804	15887733	1058811(6.441%)	7144750(43.465%)	2328892(14.168%)	1665406(10.131%)	590970(3.595%)	1660622(10.102%)
SL084	Chr01	44930519	17190608	18020626	1.57	3697953	830018	4194	656629	0.930555	0	161349	0	12041	668669	161349	0(0.0%)	124527(77.179%)	35052(21.724%)	749(0.464%)	0(0.0%)	0(0.0%)	44100501	19919826	1028863(5.014%)	7184560(35.012%)	3283997(16.003%)	3262692(15.9%)	1214755(5.92%)	1475175(7.189%)
SL084	Chr02	38244265	14005644	14505998	1.69	3697953	500354	2847	442284	0.936492	0	54383	0	3688	445971	54383	0(0.0%)	40817(75.055%)	13566(24.945%)	0(0.0%)	0(0.0%)	0(0.0%)	37743911	18029146	979069(5.284%)	7139193(38.529%)	2655921(14.333%)	2722542(14.693%)	988018(5.332%)	1373897(7.415%)
SL084	Chr03	39469687	20822740	21089858	1.13	3697953	267118	1182	180906	0.897301	143	77359	0	8711	189759	77359	0(0.0%)	57103(73.816%)	19928(25.76%)	328(0.424%)	0(0.0%)	0(0.0%)	39202569	17453236	1089985(5.974%)	6851024(37.55%)	2458814(13.476%)	2717292(14.893%)	1058889(5.804%)	1119660(6.137%)
SL084	Chr04	36803547	9959851	10066858	2.68	3697953	107007	397	61846	0.918759	0	41493	0	3669	65514	41493	0(0.0%)	40598(97.838%)	866(2.087%)	0(0.0%)	0(0.0%)	31(0.075%)	36696540	20532628	1158287(5.539%)	9545650(45.648%)	2811265(13.444%)	2316426(11.077%)	753342(3.603%)	2164453(10.351%)
SL084	Chr05	31315210	12667042	12767617	1.46	3697953	100575	642	100047	0.882798	0	467	0	62	100108	467	0(0.0%)	467(100.0%)	0(0.0%)	0(0.0%)	0(0.0%)	0(0.0%)	31214635	16386280	968883(5.682%)	7581598(44.461%)	2090722(12.261%)	2076465(12.177%)	818320(4.799%)	1208258(7.086%)
SL084	Chr06	32129071	15387893	15495907	1.08	3697953	108014	587	85238	0.909075	0	20706	0	2071	87308	20706	0(0.0%)	13414(64.783%)	6283(30.344%)	0(0.0%)	0(0.0%)	0(0.0%)	32021057	17099498	1041868(5.955%)	7188300(41.089%)	2293488(13.11%)	2424337(13.858%)	834749(4.772%)	1484345(8.485%)
SL084	Chr07	30952547	12882199	13234596	1.38	3697953	352397	2172	336295	0.970875	0	15634	0	469	336763	15634	0(0.0%)	9567(61.194%)	6046(38.672%)	0(0.0%)	0(0.0%)	0(0.0%)	30600150	16599970	1108566(6.539%)	7214493(42.552%)	2265863(13.364%)	2213572(13.056%)	711918(4.199%)	1356746(8.002%)
SL084	Chr08	31765287	13675096	13930339	1.3	3697953	255243	377	55853	0.881499	0	175763	0	23628	79563	175763	167(0.095%)	119860(68.172%)	47060(26.766%)	1090(0.62%)	29(0.016%)	4395(2.5%)	31510044	18169453	1048923(5.5%)	8654895(45.379%)	2393529(12.55%)	2100259(11.012%)	756322(3.966%)	1617612(8.481%)
SL084	Chr09	24434510	3246786	3438219	6.47	3697953	191433	619	101204	0.919539	0	82970	0	7260	108463	82970	0(0.0%)	76691(92.432%)	0(0.0%)	0(0.0%)	0(0.0%)	6215(7.491%)	24243077	13461719	830739(5.951%)	5923885(42.439%)	1907231(13.663%)	1537059(11.011%)	628285(4.501%)	1091287(7.818%)
SL084	Chr10	25626785	9717579	9847632	1.62	3697953	130053	318	51917	0.802744	1830	62724	0	13583	67329	62724	3680(5.816%)	35612(56.284%)	14171(22.397%)	5828(9.211%)	0(0.0%)	1436(2.27%)	25496732	14956731	857387(5.524%)	6902465(44.474%)	2066291(13.313%)	1839848(11.854%)	547486(3.528%)	1298548(8.367%)
SL084	Chr11	32500892	13356410	13752902	1.4	3697953	396492	1180	184017	0.911444	1470	193660	0	17346	202924	193660	0(0.0%)	151550(78.256%)	38036(19.641%)	820(0.423%)	172(0.089%)	1680(0.867%)	32104400	19566952	1088070(5.419%)	9002447(44.833%)	2844261(14.165%)	2262859(11.269%)	729560(3.633%)	1997713(9.949%)
SL084	Chr12	27257562	10806614	11265863	1.48	3697953	459249	959	150295	0.889363	5755	274773	0	28427	184666	274773	0(0.0%)	232628(83.301%)	30751(11.012%)	8472(3.034%)	4010(1.436%)	194(0.069%)	26798313	14918449	1040966(6.618%)	6213185(39.499%)	2294149(14.584%)	1696351(10.784%)	601257(3.822%)	1614769(10.266%)
SL102	Chr01	44025469	16970672	17526718	1.56	4981877	556046	1770	277042	0.505453	852	141024	0	137129	415079	141024	0(0.0%)	122973(87.2%)	9166(6.5%)	3861(2.738%)	0(0.0%)	3314(2.35%)	43469423	19348795	1091305(5.469%)	6187827(31.013%)	3322763(16.653%)	3445570(17.269%)	1213083(6.08%)	1548309(7.76%)
SL102	Chr02	38204501	14024433	14564250	1.69	4981877	539817	3133	487316	0.934974	0	49088	0	3414	490729	49088	0(0.0%)	35522(72.364%)	13566(27.636%)	0(0.0%)	0(0.0%)	0(0.0%)	37664684	18030840	984164(5.312%)	7016528(37.875%)	2696183(14.554%)	2677775(14.454%)	977589(5.277%)	1492238(8.055%)
SL102	Chr03	37516077	20018048	20484580	1.18	4981877	466532	2510	387728	0.76589	0	60356	0	18449	406176	60356	707(1.17%)	46067(76.257%)	5797(9.596%)	1041(1.723%)	4452(7.37%)	1039(1.72%)	37049545	15590393	1234819(7.653%)	5053298(31.32%)	2405480(14.909%)	2726632(16.899%)	1039186(6.441%)	1044350(6.473%)
SL102	Chr04	35197571	9897570	10018921	2.54	4981877	121351	319	50044	0.909113	0	64827	0	6481	56524	64827	0(0.0%)	47602(73.429%)	17193(26.521%)	0(0.0%)	0(0.0%)	32(0.049%)	35076220	19101239	1265386(6.485%)	8462337(43.369%)	2781538(14.255%)	2307989(11.828%)	768583(3.939%)	1795141(9.2%)
SL102	Chr05	31520046	12547620	12655450	1.5	4981877	107830	686	107238	0.779089	0	462	0	131	107368	462	0(0.0%)	462(100.0%)	0(0.0%)	0(0.0%)	0(0.0%)	0(0.0%)	31412216	16525286	990932(5.753%)	7514453(43.629%)	2094378(12.16%)	2158761(12.534%)	816180(4.739%)	1267808(7.361%)
SL102	Chr06	31731856	15367135	16105977	1.02	4981877	738842	4760	734337	0.961163	0	4331	0	175	734511	4331	0(0.0%)	4331(100.0%)	0(0.0%)	0(0.0%)	0(0.0%)	0(0.0%)	30993014	15989387	1053958(6.353%)	5913590(35.645%)	2314965(13.954%)	2404103(14.491%)	854588(5.151%)	1637359(9.87%)
SL102	Chr07	30977031	12870602	13365905	1.37	4981877	495303	3136	484851	0.916292	0	9578	0	875	485725	9578	0(0.0%)	8731(91.157%)	847(8.843%)	0(0.0%)	0(0.0%)	0(0.0%)	30481728	16479873	1159435(6.889%)	6998876(41.583%)	2330241(13.845%)	2145890(12.75%)	729921(4.337%)	1386822(8.24%)
SL102	Chr08	29431731	13202074	13475861	1.21	4981877	273787	495	74996	0.882651	414	175464	0	22914	98406	175464	167(0.095%)	120560(68.56%)	47283(26.889%)	1090(0.62%)	163(0.093%)	4395(2.499%)	29157944	16344963	1036623(6.21%)	7122606(42.671%)	2203332(13.2%)	2089608(12.519%)	732841(4.39%)	1570154(9.407%)
SL102	Chr09	23728471	2902170	3560165	6.95	4981877	657995	4030	648941	0.969188	0	8776	0	279	649219	8776	0(0.0%)	8776(100.0%)	0(0.0%)	0(0.0%)	0(0.0%)	0(0.0%)	23070476	12310999	865800(6.835%)	4602960(36.338%)	2017065(15.924%)	1624186(12.822%)	634209(5.007%)	1256234(9.917%)
SL102	Chr10	23881737	8250823	8581687	1.85	4981877	330864	1652	268138	0.970475	0	60875	0	1852	269989	60875	0(0.0%)	38413(63.101%)	22321(36.667%)	0(0.0%)	0(0.0%)	0(0.0%)	23550873	13564561	938080(6.781%)	5462624(39.487%)	2177600(15.741%)	1722845(12.454%)	556738(4.024%)	1259213(9.102%)
SL102	Chr11	33965199	13116049	13144358	1.59	4981877	28309	91	14374	0.923938	0	12876	0	1060	15481	12876	0(0.0%)	11450(88.925%)	0(0.0%)	1378(10.702%)	0(0.0%)	0(0.0%)	33936890	21130683	1148272(5.289%)	9947139(45.821%)	3086715(14.219%)	2272877(10.47%)	790699(3.642%)	2221048(10.231%)
SL102	Chr12	27521685	11061074	11726275	1.43	4981877	665201	3043	470892	0.782296	13738	152008	0	28564	513443	152008	0(0.0%)	116602(70.204%)	21746(13.093%)	9252(5.57%)	13251(7.978%)	465(0.28%)	26856484	15265485	1325744(8.507%)	5768405(37.013%)	2583627(16.578%)	1748018(11.216%)	596065(3.825%)	1679251(10.775%)
SL120	Chr01	44757904	17432640	18100106	1.53	3888655	667466	3072	482693	0.77828	3486	143806	0	37482	523689	143806	6532(4.525%)	105311(72.95%)	21560(14.935%)	950(0.658%)	0(0.0%)	6676(4.625%)	44090438	19938231	1031973(5.026%)	7145392(34.798%)	3246953(15.813%)	3289537(16.02%)	1221284(5.948%)	1526717(7.435%)
SL120	Chr02	38124447	14023357	14581351	1.68	3888655	557994	3249	505358	0.934248	0	49176	0	3461	508818	49176	0(0.0%)	35611(72.415%)	13565(27.585%)	0(0.0%)	0(0.0%)	0(0.0%)	37566453	17909641	991955(5.388%)	7114675(38.644%)	2652671(14.408%)	2663333(14.466%)	977094(5.307%)	1341301(7.285%)
SL120	Chr03	39553864	21116048	21356704	1.16	3888655	240656	1134	170776	0.931441	0	65090	0	4791	175566	65090	0(0.0%)	61005(93.724%)	3323(5.105%)	0(0.0%)	0(0.0%)	0(0.0%)	39313208	17530000	1164158(6.347%)	6875649(37.485%)	2440254(13.304%)	2776158(15.135%)	1060368(5.781%)	1096150(5.976%)
SL120	Chr04	36454144	9840874	9993716	2.69	3888655	152842	434	67620	0.959659	0	81785	0	3438	71057	81785	0(0.0%)	65965(80.655%)	15662(19.15%)	0(0.0%)	0(0.0%)	160(0.196%)	36301302	20256088	1129644(5.469%)	9482189(45.907%)	2598070(12.578%)	2387468(11.559%)	747611(3.62%)	2154427(10.431%)
SL120	Chr05	31802476	12512104	12836909	1.52	3888655	324805	1834	295583	0.810765	0	23693	0	5530	301112	23693	0(0.0%)	13427(56.671%)	10266(43.329%)	0(0.0%)	0(0.0%)	0(0.0%)	31477671	16643420	973341(5.628%)	7674453(44.372%)	2164529(12.515%)	2142965(12.39%)	805861(4.659%)	1220790(7.058%)
SL120	Chr06	32239310	15496783	15625924	1.07	3888655	129141	731	106430	0.921715	0	20934	0	1778	108207	20934	0(0.0%)	13641(65.162%)	6284(30.018%)	0(0.0%)	0(0.0%)	0(0.0%)	32110169	17125366	1006408(5.744%)	7157921(40.851%)	2339047(13.349%)	2434660(13.895%)	850286(4.853%)	1494757(8.531%)
SL120	Chr07	30729147	12781729	13265820	1.37	3888655	484091	3039	469758	0.972304	0	13937	0	397	470154	13937	0(0.0%)	13090(93.923%)	847(6.077%)	0(0.0%)	0(0.0%)	0(0.0%)	30245056	16334845	1128811(6.764%)	6992420(41.901%)	2299024(13.777%)	2173058(13.022%)	680450(4.078%)	1355173(8.121%)
SL120	Chr08	32171540	13339029	13471981	1.4	3888655	132952	382	58703	0.909549	0	67534	0	6716	65418	67534	0(0.0%)	43979(65.121%)	22942(33.971%)	0(0.0%)	0(0.0%)	0(0.0%)	32038588	17990192	1009980(5.154%)	8563836(43.699%)	2429433(12.397%)	2104232(10.737%)	747231(3.813%)	1549800(7.908%)
SL120	Chr09	25608157	3074080	3277917	7.26	3888655	203837	737	120630	0.946616	0	78766	0	4442	125071	78766	0(0.0%)	71229(90.431%)	1257(1.596%)	0(0.0%)	0(0.0%)	6216(7.892%)	25404320	14465832	910246(6.077%)	6616183(44.169%)	1946367(12.994%)	1610178(10.749%)	636649(4.25%)	1162027(7.758%)
SL120	Chr10	26023623	9803870	9941389	1.64	3888655	137519	363	59315	0.812685	1414	63556	0	13235	73963	63556	4499(7.018%)	35612(55.553%)	14170(22.105%)	5842(9.113%)	0(0.0%)	1436(2.24%)	25886104	15365962	860452(5.409%)	7245113(45.544%)	2041549(12.834%)	1861058(11.699%)	562764(3.538%)	1325871(8.335%)
SL120	Chr11	33518854	12894029	13295674	1.57	3888655	401645	1210	188726	0.910046	1470	193767	0	17683	207970	193767	0(0.0%)	151659(78.269%)	38034(19.629%)	820(0.423%)	172(0.089%)	1680(0.867%)	33117209	20294906	1072604(5.147%)	9076810(43.552%)	3427864(16.447%)	2240977(10.753%)	813618(3.904%)	2007976(9.635%)
SL120	Chr12	28369111	10969599	11425306	1.54	3888655	455707	923	144723	0.881303	5755	274072	0	31158	181825	274072	0(0.0%)	231934(83.262%)	30752(11.04%)	8473(3.042%)	4010(1.44%)	194(0.07%)	27913404	15880110	1044311(6.211%)	6940265(41.275%)	2364455(14.062%)	1761540(10.476%)	586846(3.49%)	1732025(10.301%)
SL121	Chr01	43334309	17098760	17554596	1.51	3616557	455836	1354	213283	0.430737	852	104477	0	137225	351359	104477	0(0.0%)	87997(84.226%)	14583(13.958%)	865(0.828%)	0(0.0%)	355(0.34%)	42878473	18716289	1042552(5.401%)	6074802(31.469%)	3263544(16.906%)	3152577(16.331%)	1217944(6.309%)	1503855(7.79%)
SL121	Chr02	37739686	13943253	14430953	1.67	3616557	487700	2733	424890	0.93853	0	58950	0	3861	428750	58950	0(0.0%)	45384(76.987%)	13566(23.013%)	0(0.0%)	0(0.0%)	0(0.0%)	37251986	17484837	1011918(5.629%)	6529793(36.322%)	2712370(15.088%)	2711932(15.085%)	982330(5.464%)	1366848(7.603%)
SL121	Chr03	39156128	20948062	21456304	1.18	3616557	508242	2423	370408	0.934908	0	128863	0	8972	379379	128863	0(0.0%)	95415(74.044%)	33138(25.716%)	0(0.0%)	0(0.0%)	0(0.0%)	38647886	17150354	1086993(6.148%)	6624250(37.468%)	2409067(13.626%)	2726389(15.421%)	1059522(5.993%)	1126991(6.374%)
SL121	Chr04	35201728	8836429	8861563	2.98	3616557	25134	102	16021	0.944042	0	8604	0	510	16530	8604	0(0.0%)	7775(90.365%)	829(9.635%)	0(0.0%)	0(0.0%)	0(0.0%)	35176594	19374678	1171133(5.933%)	9055539(45.877%)	2560451(12.972%)	2217682(11.235%)	736355(3.731%)	1974252(10.002%)
SL121	Chr05	31395405	12461122	12548983	1.51	3616557	87861	558	87333	0.882798	0	467	0	62	87394	467	0(0.0%)	467(100.0%)	0(0.0%)	0(0.0%)	0(0.0%)	0(0.0%)	31307544	16421174	946137(5.523%)	7622638(44.494%)	2041884(11.919%)	2119978(12.374%)	822316(4.8%)	1208012(7.051%)
SL121	Chr06	32015236	15511381	15635460	1.06	3616557	124079	664	95808	0.868633	0	24558	0	3714	99521	24558	0(0.0%)	17265(70.303%)	6284(25.588%)	0(0.0%)	0(0.0%)	0(0.0%)	31891157	16968947	1047345(6.032%)	7083306(40.794%)	2296889(13.228%)	2383889(13.729%)	816983(4.705%)	1507265(8.681%)
SL121	Chr07	30119786	12599017	13100320	1.35	3616557	501303	3149	486787	0.945374	0	13724	0	793	487579	13724	0(0.0%)	12816(93.384%)	908(6.616%)	0(0.0%)	0(0.0%)	0(0.0%)	29618483	15675258	1134971(7.083%)	6136141(38.294%)	2412580(15.056%)	2200015(13.73%)	701607(4.379%)	1340971(8.369%)
SL121	Chr08	28974954	13082070	13213292	1.2	3616557	131222	638	98126	0.882406	0	29205	0	3892	102017	29205	0(0.0%)	15893(54.419%)	12091(41.4%)	0(0.0%)	0(0.0%)	0(0.0%)	28843732	16180659	990703(5.995%)	7138373(43.199%)	2217875(13.422%)	2096160(12.685%)	733076(4.436%)	1461081(8.842%)
SL121	Chr09	24833730	3112104	3335460	6.91	3616557	223356	781	127720	0.927925	0	88744	0	6893	134612	88744	0(0.0%)	82465(92.925%)	0(0.0%)	0(0.0%)	0(0.0%)	6215(7.003%)	24610374	13368613	809737(5.712%)	6084582(42.92%)	1980847(13.973%)	1567290(11.055%)	612571(4.321%)	1065259(7.514%)
SL121	Chr10	25203517	9282077	9674650	1.67	3616557	392573	941	150388	0.879964	1369	213115	0	27702	179458	213115	2998(1.405%)	150564(70.545%)	51534(24.146%)	3888(1.822%)	0(0.0%)	1955(0.916%)	24810944	14379641	882062(5.917%)	6475632(43.44%)	1983062(13.303%)	1729348(11.601%)	566512(3.8%)	1323396(8.878%)
SL121	Chr11	31513755	13226471	13646904	1.35	3616557	420433	1610	250252	0.910455	1470	154943	0	13769	265490	154943	0(0.0%)	112148(72.38%)	38886(25.097%)	823(0.531%)	172(0.111%)	1777(1.147%)	31093322	18459220	1121143(5.91%)	8063402(42.505%)	2762176(14.56%)	2145103(11.308%)	734813(3.873%)	2035160(10.728%)
SL121	Chr12	26472174	11186025	11444843	1.34	3616557	258818	1018	160894	0.908042	0	88920	0	9005	169898	88920	0(0.0%)	85679(96.353%)	2772(3.117%)	0(0.0%)	0(0.0%)	0(0.0%)	26213356	14772752	1155021(7.666%)	6084335(40.381%)	2396186(15.903%)	1614827(10.718%)	586805(3.895%)	1494726(9.92%)
SL126	Chr01	43778139	16763411	17382669	1.57	5378332	619258	2217	348348	0.542621	852	147002	0	123057	472313	147002	0(0.0%)	121945(82.955%)	15988(10.876%)	4092(2.784%)	0(0.0%)	3289(2.237%)	43158881	19127060	1119559(5.674%)	5983518(30.325%)	3360207(17.03%)	3338660(16.92%)	1218223(6.174%)	1587391(8.045%)
SL126	Chr02	36423260	13647376	14222999	1.63	5378332	575623	3354	522560	0.677239	0	35937	0	17127	539686	35937	0(0.0%)	22092(61.474%)	13357(37.168%)	0(0.0%)	0(0.0%)	0(0.0%)	35847637	16228289	1056106(6.317%)	5087989(30.434%)	2754060(16.474%)	2743879(16.413%)	952019(5.695%)	1435346(8.586%)
SL126	Chr03	37496702	20112605	20520510	1.18	5378332	407905	2407	371666	0.918929	0	33302	0	2938	374603	33302	0(0.0%)	26501(79.578%)	6801(20.422%)	0(0.0%)	0(0.0%)	0(0.0%)	37088797	15638819	1232860(7.617%)	5111317(31.581%)	2412557(14.906%)	2713194(16.764%)	1040711(6.43%)	1050587(6.491%)
SL126	Chr04	35515382	10247438	10368789	2.45	5378332	121351	324	50723	0.918164	0	64849	0	5780	56502	64849	0(0.0%)	47624(73.438%)	17193(26.512%)	0(0.0%)	0(0.0%)	32(0.049%)	35394031	19401049	1252903(6.328%)	8770916(44.301%)	2780882(14.046%)	2295053(11.592%)	773334(3.906%)	1801649(9.1%)
SL126	Chr05	30376517	12522567	12626524	1.42	5378332	103957	664	103927	0	0	0	0	31	0	0	0	0	0	0	0	0	30272560	15517826	1032504(6.369%)	6487030(40.014%)	2040875(12.589%)	2154515(13.29%)	815178(5.028%)	1347232(8.31%)
SL126	Chr06	31892416	15358374	16081954	1.03	5378332	723580	4662	719108	0.986363	0	4412	0	61	719168	4412	0(0.0%)	4412(100.0%)	0(0.0%)	0(0.0%)	0(0.0%)	0(0.0%)	31168836	16110328	1082762(6.472%)	5906501(35.304%)	2321935(13.878%)	2425406(14.497%)	862828(5.157%)	1681852(10.053%)
SL126	Chr07	29922595	12088585	12288990	1.46	5378332	200405	1201	194176	0.909791	0	5668	0	562	194737	5668	0(0.0%)	5668(100.0%)	0(0.0%)	0(0.0%)	0(0.0%)	0(0.0%)	29722190	15729120	1119027(6.956%)	6081554(37.801%)	2410437(14.983%)	2248652(13.977%)	730529(4.541%)	1404759(8.732%)
SL126	Chr08	28614596	13112439	13247626	1.17	5378332	135187	349	53432	0.810888	414	66295	0	15047	68975	66295	167(0.252%)	54045(81.451%)	5598(8.437%)	1093(1.647%)	363(0.547%)	3418(5.151%)	28479409	15684035	1047165(6.53%)	6229988(38.847%)	2344870(14.621%)	2067440(12.891%)	742456(4.63%)	1643474(10.248%)
SL126	Chr09	23720348	2994136	3439304	6.77	5378332	445168	2743	440372	0.90911	0	4361	0	436	440807	4361	0(0.0%)	4361(100.0%)	0(0.0%)	0(0.0%)	0(0.0%)	0(0.0%)	23275180	12396483	841882(6.597%)	4626605(36.253%)	2084614(16.334%)	1638663(12.84%)	636801(4.99%)	1263407(9.9%)
SL126	Chr10	23896420	8274668	8607866	1.85	5378332	333198	1671	271316	0.981578	0	60743	0	1140	272455	60743	0(0.0%)	38340(63.118%)	22262(36.649%)	0(0.0%)	0(0.0%)	0(0.0%)	23563222	13570453	964458(6.969%)	5344048(38.614%)	2229308(16.108%)	1754843(12.68%)	570587(4.123%)	1246095(9.004%)
SL126	Chr11	30082807	12257065	13306542	1.37	5378332	1049477	6104	965104	0.879809	3134	74233	0	7007	975336	74233	0(0.0%)	56475(73.267%)	17914(23.24%)	2151(2.791%)	172(0.223%)	0(0.0%)	29033330	16635163	1206350(7.111%)	6076832(35.819%)	2863838(16.88%)	2143125(12.632%)	729645(4.301%)	1950952(11.5%)
SL126	Chr12	27570515	11040954	11704177	1.44	5378332	663223	2998	465751	0.779985	11578	154026	0	31869	509447	154026	0(0.0%)	116726(70.557%)	22078(13.346%)	9079(5.488%)	12309(7.44%)	465(0.281%)	26907292	15302518	1301838(8.33%)	5822305(37.255%)	2574674(16.475%)	1755009(11.23%)	595700(3.812%)	1683612(10.773%)
SL127	Chr01	44457606	17236447	17966254	1.54	3571531	729807	3417	540339	0.923798	0	175031	0	14438	554776	175031	0(0.0%)	143612(82.049%)	26296(15.024%)	1486(0.849%)	0(0.0%)	0(0.0%)	43727799	19575070	1052458(5.219%)	6703616(33.24%)	3277750(16.253%)	3321195(16.468%)	1221892(6.059%)	1503808(7.457%)
SL127	Chr02	38470753	13982977	14505524	1.71	3571531	522547	2999	466537	0.939476	0	52621	0	3390	469926	52621	0(0.0%)	39055(74.219%)	13566(25.781%)	0(0.0%)	0(0.0%)	0(0.0%)	37948206	18162819	990953(5.313%)	7022024(37.649%)	2807262(15.051%)	2797459(14.999%)	994156(5.33%)	1340349(7.186%)
SL127	Chr03	40049030	21306033	21575970	1.15	3571531	269937	1151	176210	0.872727	143	81799	0	11786	188138	81799	0(0.0%)	61543(75.237%)	19928(24.362%)	328(0.401%)	0(0.0%)	0(0.0%)	39779093	17873800	1140621(6.087%)	6956430(37.126%)	2577376(13.755%)	2832786(15.119%)	1054491(5.628%)	1137103(6.069%)
SL127	Chr04	36876015	10202636	10351950	2.6	3571531	149314	413	64438	0.963783	0	81803	0	3074	67511	81803	0(0.0%)	65966(80.638%)	15679(19.166%)	0(0.0%)	0(0.0%)	160(0.196%)	36726701	20791794	1156983(5.464%)	9714276(45.874%)	2721314(12.851%)	2383990(11.258%)	768450(3.629%)	2297730(10.851%)
SL127	Chr05	31448190	12649477	12755412	1.48	3571531	105935	675	105407	0.882798	0	467	0	62	105468	467	0(0.0%)	467(100.0%)	0(0.0%)	0(0.0%)	0(0.0%)	0(0.0%)	31342255	16444058	954218(5.554%)	7571552(44.068%)	2086423(12.143%)	2111125(12.287%)	814475(4.74%)	1264556(7.36%)
SL127	Chr06	32469800	15676560	15796786	1.06	3571531	120226	643	96674	0.92035	0	21677	0	1876	98549	21677	0(0.0%)	13471(62.144%)	7196(33.196%)	0(0.0%)	0(0.0%)	0(0.0%)	32349574	17188380	1054541(5.921%)	7349191(41.267%)	2249784(12.633%)	2365995(13.285%)	813670(4.569%)	1548154(8.693%)
SL127	Chr07	29839952	12178570	12678920	1.41	3571531	500350	3153	487615	0.964196	0	12280	0	456	488070	12280	0(0.0%)	11433(93.103%)	847(6.897%)	0(0.0%)	0(0.0%)	0(0.0%)	29339602	15399446	1120630(7.111%)	6211050(39.412%)	2316207(14.697%)	2174523(13.798%)	709724(4.503%)	1151796(7.309%)
SL127	Chr08	28416933	12955376	13019410	1.19	3571531	64034	351	54171	0.939882	0	9271	0	593	54763	9271	0(0.0%)	7627(82.267%)	1031(11.121%)	0(0.0%)	0(0.0%)	0(0.0%)	28352899	15599546	1020550(6.402%)	6248980(39.202%)	2333011(14.636%)	2082218(13.063%)	742110(4.656%)	1555272(9.757%)
SL127	Chr09	25624897	3710138	3928935	5.85	3571531	218797	776	127050	0.927639	0	85109	0	6639	133688	85109	0(0.0%)	78829(92.621%)	0(0.0%)	0(0.0%)	0(0.0%)	6216(7.304%)	25406100	14186585	905664(6.222%)	6119086(42.038%)	2217624(15.235%)	1582008(10.868%)	629911(4.328%)	1146092(7.874%)
SL127	Chr10	25136753	8671325	8778377	1.89	3571531	107052	346	56806	0.84005	959	42210	0	7078	64842	42210	4095(9.629%)	22382(52.631%)	6421(15.099%)	2521(5.928%)	0(0.0%)	1437(3.379%)	25029701	14421779	835793(5.575%)	6410297(42.761%)	2118894(14.134%)	1758298(11.729%)	566130(3.776%)	1292915(8.625%)
SL127	Chr11	34693018	14320237	14651320	1.4	3571531	331083	1105	173288	0.937952	0	148005	0	9791	183078	148005	0(0.0%)	115117(77.779%)	32305(21.827%)	75(0.051%)	0(0.0%)	0(0.0%)	34361935	21624884	1158954(5.229%)	10900995(49.184%)	2895223(13.063%)	2194653(9.902%)	740170(3.34%)	2077588(9.374%)
SL127	Chr12	27791646	11176477	11628926	1.45	3571531	452449	916	143494	0.889136	5755	274704	0	28497	177935	274704	0(0.0%)	232619(83.319%)	30700(10.996%)	8472(3.034%)	4010(1.436%)	194(0.069%)	27339197	15384353	1082202(6.666%)	6729280(41.448%)	2311626(14.238%)	1722970(10.612%)	591744(3.645%)	1504964(9.27%)
SL129	Chr01	43641417	16776308	17465383	1.56	6227504	689075	2824	445455	0.60826	852	148185	0	94584	540947	148185	0(0.0%)	124461(83.99%)	15989(10.79%)	3552(2.397%)	0(0.0%)	3091(2.086%)	42952342	18894505	1107533(5.682%)	5788326(29.693%)	3377228(17.325%)	3319544(17.029%)	1220671(6.262%)	1549809(7.95%)
SL129	Chr02	36116422	13585634	14156811	1.62	6227504	571177	3477	540420	0.868652	0	26718	0	4040	544459	26718	0(0.0%)	13781(51.579%)	12449(46.594%)	0(0.0%)	0(0.0%)	0(0.0%)	35545245	15962082	1044101(6.348%)	4940879(30.038%)	2727078(16.579%)	2718018(16.524%)	957999(5.824%)	1361505(8.277%)
SL129	Chr03	37388278	19988666	20396826	1.18	6227504	408160	2422	373697	0.968895	0	33392	0	1072	374768	33392	0(0.0%)	33392(100.0%)	0(0.0%)	0(0.0%)	0(0.0%)	0(0.0%)	36980118	15515714	1177923(7.334%)	5068817(31.561%)	2397102(14.926%)	2709974(16.874%)	1037568(6.46%)	1042249(6.49%)
SL129	Chr04	35058689	9465498	9583384	2.69	6227504	117886	319	49885	0.900165	0	61213	0	6789	56673	61213	0(0.0%)	43988(71.861%)	17193(28.087%)	0(0.0%)	0(0.0%)	32(0.052%)	34940803	18950071	1267121(6.547%)	8407014(43.434%)	2757310(14.246%)	2290637(11.834%)	751988(3.885%)	1784237(9.218%)
SL129	Chr05	30933437	12661201	12762660	1.44	6227504	101459	645	100838	0.750804	0	467	0	155	100992	467	0(0.0%)	467(100.0%)	0(0.0%)	0(0.0%)	0(0.0%)	0(0.0%)	30831978	15971760	1095026(6.552%)	6808770(40.741%)	2044770(12.235%)	2170234(12.986%)	819147(4.901%)	1383837(8.28%)
SL129	Chr06	32024705	15120672	16216918	1.05	6227504	1096246	7077	1091756	0.972167	0	4366	0	125	1091880	4366	0(0.0%)	4366(100.0%)	0(0.0%)	0(0.0%)	0(0.0%)	0(0.0%)	30928459	15895596	1080281(6.584%)	5768118(35.155%)	2343953(14.286%)	2394038(14.591%)	843005(5.138%)	1629831(9.933%)
SL129	Chr07	28959288	12055493	12184672	1.39	6227504	129179	390	62786	0.942676	0	62588	0	3806	66591	62588	0(0.0%)	46846(74.848%)	15742(25.152%)	0(0.0%)	0(0.0%)	0(0.0%)	28830109	14825928	1062269(6.996%)	5598555(36.874%)	2237168(14.735%)	2153080(14.181%)	719123(4.736%)	1333684(8.784%)
SL129	Chr08	29068265	13106623	13119990	1.22	6227504	13367	87	13368	#DIV/0!	0	0	0	0	0	0	0	0	0	0	0	0	29054898	16151878	1047661(6.346%)	6599317(39.976%)	2373745(14.379%)	2075244(12.571%)	747911(4.531%)	1692021(10.25%)
SL129	Chr09	23099972	2436828	3178681	8.18	6227504	741853	3978	639425	0.790635	5702	80984	0	15743	660918	80984	0(0.0%)	61689(71.165%)	18884(21.785%)	2357(2.719%)	180(0.208%)	1229(1.418%)	22358119	11660343	873522(7.275%)	4060518(33.819%)	1961167(16.334%)	1593611(13.273%)	633498(5.276%)	1238252(10.313%)
SL129	Chr10	24935136	8257201	8708605	1.97	6227504	451404	2282	367038	0.908045	0	76609	0	7758	374860	76609	1244(1.624%)	62442(81.507%)	8539(11.146%)	2166(2.827%)	0(0.0%)	1421(1.855%)	24483732	14379594	923902(6.3%)	6164774(42.037%)	2195925(14.974%)	1775606(12.108%)	580150(3.956%)	1293052(8.817%)
SL129	Chr11	30092375	12330692	13744731	1.33	6227504	1414039	8405	1325863	0.891253	3134	78588	0	6455	1335543	78588	0(0.0%)	60878(74.756%)	17913(21.996%)	2151(2.641%)	172(0.211%)	0(0.0%)	28678336	16258110	1172002(7.069%)	5949160(35.88%)	2849672(17.187%)	2087326(12.589%)	758126(4.572%)	1833543(11.058%)
SL129	Chr12	27720666	11141068	11634727	1.44	6227504	493659	1359	214091	0.827567	12068	231362	0	36139	262425	231362	0(0.0%)	198101(84.377%)	18997(8.091%)	7634(3.252%)	3647(1.553%)	92(0.039%)	27227007	15746282	1305245(8.125%)	6328617(39.397%)	2565866(15.973%)	1743010(10.851%)	592365(3.688%)	1683847(10.482%)
SL133	Chr01	45322609	17505499	18256813	1.55	3410174	751314	3450	542725	0.874634	0	182440	0	26150	568874	182440	0(0.0%)	143737(78.786%)	35589(19.507%)	746(0.409%)	0(0.0%)	0(0.0%)	44571295	20430454	1031298(4.904%)	7554960(35.926%)	3207393(15.252%)	3302002(15.702%)	1236871(5.882%)	1592614(7.573%)
SL133	Chr02	37852989	14048649	14595872	1.66	3410174	547223	3178	494603	0.93305	0	49098	0	3523	498125	49098	0(0.0%)	35532(72.37%)	13566(27.63%)	0(0.0%)	0(0.0%)	0(0.0%)	37305766	17663145	962629(5.302%)	6842573(37.691%)	2663398(14.671%)	2689594(14.815%)	975241(5.372%)	1395838(7.689%)
SL133	Chr03	39130594	21121054	21457936	1.2	3410174	336882	1837	278908	0.906097	0	52531	0	5444	284351	52531	0(0.0%)	49802(94.805%)	2418(4.603%)	0(0.0%)	0(0.0%)	0(0.0%)	38793712	17279733	1142997(6.42%)	6675730(37.498%)	2429213(13.645%)	2751841(15.457%)	1058767(5.947%)	1073650(6.031%)
SL133	Chr04	37972256	10523662	10676510	2.59	3410174	152848	427	66402	0.946638	0	81834	0	4613	71014	81834	0(0.0%)	66003(80.653%)	15673(19.152%)	0(0.0%)	0(0.0%)	160(0.196%)	37819408	21653615	1197522(5.432%)	10536594(47.795%)	2720961(12.343%)	2431450(11.029%)	734939(3.334%)	2263589(10.268%)
SL133	Chr05	31255162	12877463	12990454	1.42	3410174	112991	720	112463	0.882798	0	467	0	62	112524	467	0(0.0%)	467(100.0%)	0(0.0%)	0(0.0%)	0(0.0%)	0(0.0%)	31142171	16622680	976295(5.74%)	7702964(45.292%)	2075781(12.205%)	2161652(12.71%)	801076(4.71%)	1264729(7.436%)
SL133	Chr06	32395318	15468138	15579353	1.09	3410174	111215	614	89129	0.937475	0	20706	0	1381	90509	20706	0(0.0%)	13414(64.783%)	6283(30.344%)	0(0.0%)	0(0.0%)	0(0.0%)	32284103	17472578	1001992(5.608%)	7605101(42.567%)	2356746(13.191%)	2351226(13.16%)	827664(4.633%)	1521756(8.518%)
SL133	Chr07	30611190	12822115	13309352	1.35	3410174	487237	3084	476909	0.924194	0	9546	0	783	477691	9546	0(0.0%)	8699(91.127%)	847(8.873%)	0(0.0%)	0(0.0%)	0(0.0%)	30123953	16135273	1148164(6.967%)	6889419(41.806%)	2295256(13.928%)	2151543(13.056%)	706208(4.285%)	1245848(7.56%)
SL133	Chr08	29631331	13011241	13166852	1.27	3410174	155611	621	95482	0.962614	0	57882	0	2248	97729	57882	0(0.0%)	43190(74.617%)	14692(25.383%)	0(0.0%)	0(0.0%)	0(0.0%)	29475720	16483891	1017494(6.045%)	7113316(42.259%)	2328074(13.831%)	2138347(12.704%)	743946(4.42%)	1515545(9.004%)
SL133	Chr09	25243732	3122121	3310487	7.03	3410174	188366	706	115775	0.910569	0	66100	0	6492	122266	66100	0(0.0%)	59820(90.499%)	0(0.0%)	0(0.0%)	0(0.0%)	6216(9.404%)	25055366	14204250	852805(5.812%)	6495248(44.263%)	1900905(12.954%)	1620681(11.044%)	619098(4.219%)	1185490(8.079%)
SL133	Chr10	25616129	9597427	9697859	1.66	3410174	100432	405	64484	0.879246	0	31608	0	4341	68824	31608	0(0.0%)	27056(85.599%)	3693(11.684%)	433(1.37%)	0(0.0%)	0(0.0%)	25515697	14881320	841097(5.446%)	6963536(45.087%)	2011064(13.021%)	1810058(11.72%)	560033(3.626%)	1238346(8.018%)
SL133	Chr11	33548866	13293274	13310422	1.52	3410174	17148	85	13407	0.998931	0	3738	0	4	13410	3738	0(0.0%)	3738(100.0%)	0(0.0%)	0(0.0%)	0(0.0%)	0(0.0%)	33531718	21013542	1186312(5.559%)	9613213(45.048%)	3289861(15.417%)	2325228(10.896%)	861907(4.039%)	2068307(9.692%)
SL133	Chr12	27700002	11112182	11561089	1.45	3410174	448907	883	138444	0.868094	12573	269512	0	28379	179585	269512	0(0.0%)	231856(82.464%)	32334(11.5%)	8636(3.072%)	4946(1.759%)	194(0.069%)	27251095	15315567	1079522(6.64%)	6595859(40.569%)	2348718(14.446%)	1676029(10.309%)	598156(3.679%)	1565833(9.631%)
SL148	Chr01	45147969	17465657	18225246	1.54	3521090	759589	3440	540386	0.707478	0	155082	0	64122	604507	155082	0(0.0%)	118118(76.165%)	35333(22.783%)	749(0.483%)	0(0.0%)	0(0.0%)	44388380	20297834	1039174(4.976%)	7589493(36.342%)	3247312(15.549%)	3286373(15.736%)	1211638(5.802%)	1459665(6.989%)
SL148	Chr02	38566439	14100618	14555481	1.7	3521090	454863	2604	404948	0.925395	0	46192	0	3724	408671	46192	0(0.0%)	32626(70.631%)	13566(29.369%)	0(0.0%)	0(0.0%)	0(0.0%)	38111576	18370606	959612(5.087%)	7423750(39.357%)	2713539(14.386%)	2735425(14.502%)	985053(5.222%)	1399996(7.422%)
SL148	Chr03	39609626	21147436	21465399	1.17	3521090	317963	1184	178309	0.814371	0	113731	0	25924	204232	113731	2527(2.222%)	93232(81.976%)	9270(8.151%)	991(0.871%)	4452(3.915%)	1038(0.913%)	39291663	17546962	1188905(6.485%)	6947978(37.898%)	2421252(13.207%)	2767082(15.093%)	1044590(5.698%)	1069902(5.836%)
SL148	Chr04	36532661	10107897	10204482	2.6	3521090	96585	332	51697	0.924904	0	41518	0	3371	55067	41518	0(0.0%)	40623(97.84%)	866(2.086%)	0(0.0%)	0(0.0%)	31(0.075%)	36436076	20364772	1159267(5.587%)	9423781(45.416%)	2764109(13.321%)	2329596(11.227%)	737906(3.556%)	2200123(10.603%)
SL148	Chr05	30927166	12443058	12554509	1.48	3521090	111451	710	110923	0.882798	0	467	0	62	110984	467	0(0.0%)	467(100.0%)	0(0.0%)	0(0.0%)	0(0.0%)	0(0.0%)	30815715	16026250	975920(5.852%)	7270321(43.595%)	2077621(12.458%)	2059427(12.349%)	819634(4.915%)	1205175(7.227%)
SL148	Chr06	32406587	15578092	15702818	1.07	3521090	124726	703	101920	0.907879	0	20706	0	2101	104020	20706	0(0.0%)	13414(64.783%)	6283(30.344%)	0(0.0%)	0(0.0%)	0(0.0%)	32281861	17434004	1076005(6.037%)	7489689(42.019%)	2366291(13.275%)	2351398(13.192%)	815487(4.575%)	1517472(8.513%)
SL148	Chr07	30850394	12915724	13417857	1.35	3521090	502133	3136	484869	0.965595	0	16671	0	594	485462	16671	0(0.0%)	15824(94.919%)	847(5.081%)	0(0.0%)	0(0.0%)	0(0.0%)	30348261	16413097	1128403(6.731%)	7177514(42.817%)	2233337(13.323%)	2140374(12.768%)	706560(4.215%)	1315161(7.846%)
SL148	Chr08	31297962	13008820	13148524	1.4	3521090	139704	421	63854	0.900529	0	68306	0	7545	71398	68306	0(0.0%)	44712(65.458%)	22981(33.644%)	0(0.0%)	0(0.0%)	0(0.0%)	31158258	17615425	1032562(5.543%)	8300437(44.561%)	2249207(12.075%)	2082273(11.179%)	767803(4.122%)	1601210(8.596%)
SL148	Chr09	24293379	3046006	3238000	6.91	3521090	191994	626	102404	0.925796	0	82943	0	6648	109051	82943	0(0.0%)	76664(92.43%)	0(0.0%)	0(0.0%)	0(0.0%)	6215(7.493%)	24101385	13362602	849143(6.128%)	5813438(41.95%)	1875008(13.53%)	1554473(11.217%)	604288(4.361%)	1118007(8.068%)
SL148	Chr10	26491693	10296659	10459978	1.56	3521090	163319	318	52109	0.770562	1566	85695	0	23950	77624	85695	4499(5.209%)	50245(58.175%)	16986(19.667%)	9431(10.919%)	0(0.0%)	1437(1.664%)	26328374	15641615	916786(5.658%)	7429264(45.85%)	2154115(13.294%)	1851692(11.428%)	557847(3.443%)	1262191(7.79%)
SL148	Chr11	32629902	13436652	13836796	1.4	3521090	400144	1185	185742	0.903495	1470	193712	0	19221	206524	193712	0(0.0%)	151604(78.263%)	38034(19.634%)	820(0.423%)	172(0.089%)	1680(0.867%)	32229758	19669057	1094158(5.424%)	8945119(44.344%)	2901391(14.383%)	2317139(11.487%)	735906(3.648%)	2035953(10.093%)
SL148	Chr12	28066083	11374232	11632851	1.44	3521090	258619	801	126498	0.927438	0	122535	0	9587	136084	122535	0(0.0%)	111714(91.031%)	10536(8.585%)	0(0.0%)	0(0.0%)	0(0.0%)	27807464	15964675	1066565(6.357%)	7141738(42.565%)	2352461(14.021%)	1694048(10.097%)	598341(3.566%)	1681956(10.024%)
SL167	Chr01	43816635	16754249	17461339	1.57	5589024	707090	2732	429478	0.564977	852	156845	0	119916	550302	156845	0(0.0%)	131715(83.978%)	16010(10.208%)	4088(2.606%)	0(0.0%)	3322(2.118%)	43109545	19047121	1153967(5.871%)	5835451(29.691%)	3363020(17.111%)	3373854(17.166%)	1219428(6.204%)	1579169(8.035%)
SL167	Chr02	36585310	13622680	14199513	1.64	5589024	576833	3360	523518	0.674038	0	35937	0	17379	540896	35937	0(0.0%)	22092(61.474%)	13357(37.168%)	0(0.0%)	0(0.0%)	0(0.0%)	36008477	16344567	1063024(6.314%)	5191122(30.834%)	2768748(16.446%)	2756527(16.373%)	955728(5.677%)	1396287(8.294%)
SL167	Chr03	37490401	20103285	20513926	1.18	5589024	410641	2465	380801	0.973024	0	29036	0	805	381605	29036	0(0.0%)	29036(100.0%)	0(0.0%)	0(0.0%)	0(0.0%)	0(0.0%)	37079760	15619920	1244363(7.695%)	5053144(31.249%)	2412312(14.918%)	2732691(16.899%)	1039746(6.43%)	1053681(6.516%)
SL167	Chr04	34727014	9600599	9721950	2.6	5589024	121351	289	45384	0.854386	0	64906	0	11062	56445	64906	0(0.0%)	47681(73.462%)	17193(26.489%)	0(0.0%)	0(0.0%)	32(0.049%)	34605663	18702510	1260658(6.6%)	8153496(42.684%)	2740304(14.346%)	2286658(11.971%)	758295(3.97%)	1796603(9.405%)
SL167	Chr05	30204767	12479412	12583369	1.41	5589024	103957	664	103927	0	0	0	0	31	0	0	0	0	0	0	0	0	30100810	15453657	1031784(6.437%)	6406531(39.969%)	2040823(12.732%)	2159324(13.472%)	811103(5.06%)	1359536(8.482%)
SL167	Chr06	31516446	15122168	15858000	1.04	5589024	735832	4739	731291	0.971378	0	4412	0	130	731420	4412	0(0.0%)	4412(100.0%)	0(0.0%)	0(0.0%)	0(0.0%)	0(0.0%)	30780614	15779743	1046673(6.391%)	5839641(35.659%)	2250774(13.744%)	2429384(14.835%)	847486(5.175%)	1541259(9.411%)
SL167	Chr07	29736651	12118085	12318606	1.44	5589024	200521	1205	194456	0.934388	0	5668	0	398	194853	5668	0(0.0%)	5668(100.0%)	0(0.0%)	0(0.0%)	0(0.0%)	0(0.0%)	29536130	15551886	1122630(7.059%)	5986082(37.64%)	2383437(14.987%)	2184837(13.738%)	737970(4.64%)	1391454(8.749%)
SL167	Chr08	28589755	12978192	13121607	1.19	5589024	143415	396	61046	0.804528	414	66269	0	15687	77229	66269	167(0.252%)	54042(81.481%)	5597(8.439%)	1093(1.648%)	363(0.547%)	3394(5.117%)	28446340	15687282	1040135(6.484%)	6281337(39.156%)	2344362(14.614%)	2071987(12.916%)	740382(4.615%)	1624934(10.129%)
SL167	Chr09	23325616	2739896	3290611	7.31	5589024	550715	2769	444269	0.800145	5701	85173	0	15573	465591	85173	0(0.0%)	66110(72.804%)	18820(20.726%)	2112(2.326%)	180(0.198%)	1238(1.363%)	22774901	12089660	843737(6.781%)	4468593(35.915%)	1966479(15.805%)	1633423(13.128%)	621677(4.997%)	1261065(10.136%)
SL167	Chr10	23845508	8250431	8581301	1.85	5589024	330870	1656	268765	0.978424	0	60766	0	1340	270104	60766	0(0.0%)	38363(63.132%)	22262(36.636%)	0(0.0%)	0(0.0%)	0(0.0%)	23514638	13542450	945406(6.843%)	5370934(38.876%)	2221015(16.076%)	1738577(12.584%)	565970(4.097%)	1247651(9.031%)
SL167	Chr11	29837654	12291857	13333898	1.34	5589024	1042041	6033	953891	0.891448	3134	78582	0	6435	963551	78582	0(0.0%)	60824(74.695%)	17914(21.999%)	2151(2.642%)	172(0.211%)	0(0.0%)	28795613	16403922	1145728(6.85%)	5990258(35.813%)	2821296(16.867%)	2088542(12.486%)	737621(4.41%)	1986953(11.879%)
SL167	Chr12	27673550	11204681	11870439	1.41	5589024	665758	3017	468430	0.780372	11576	153990	0	31763	512018	153990	0(0.0%)	116654(70.531%)	22110(13.368%)	9079(5.489%)	12309(7.442%)	465(0.281%)	27007792	15388774	1316397(8.377%)	5884467(37.446%)	2595073(16.514%)	1753333(11.157%)	597143(3.8%)	1674385(10.655%)
SL170	Chr01	43780448	16811620	17510471	1.56	5973436	698851	2674	420106	0.562616	852	156827	0	121067	542081	156827	0(0.0%)	131674(83.961%)	16010(10.209%)	4130(2.633%)	0(0.0%)	3314(2.113%)	43081597	19037138	1124606(5.727%)	5932353(30.21%)	3325368(16.934%)	3335403(16.985%)	1218296(6.204%)	1580560(8.049%)
SL170	Chr02	36279304	13592063	14167864	1.63	5973436	575801	3281	511100	0.727319	0	47059	0	17643	528742	47059	0(0.0%)	33215(70.582%)	13356(28.381%)	0(0.0%)	0(0.0%)	0(0.0%)	35703503	16127256	1057321(6.363%)	5061970(30.465%)	2742912(16.508%)	2730307(16.432%)	947892(5.705%)	1396814(8.407%)
SL170	Chr03	37704162	20130062	20520457	1.17	5973436	390395	2313	357206	0.967882	0	32124	0	1066	358271	32124	0(0.0%)	32124(100.0%)	0(0.0%)	0(0.0%)	0(0.0%)	0(0.0%)	37313767	15816651	1198365(7.328%)	5306408(32.451%)	2415049(14.769%)	2706544(16.552%)	1039488(6.357%)	1073384(6.564%)
SL170	Chr04	36196175	9930605	10051145	2.63	5973436	120540	324	50658	0.927951	0	64848	0	5035	55692	64848	0(0.0%)	47623(73.438%)	17193(26.513%)	0(0.0%)	0(0.0%)	32(0.049%)	36075635	19879719	1292708(6.37%)	8814980(43.44%)	2871763(14.152%)	2373904(11.699%)	793937(3.913%)	1950044(9.61%)
SL170	Chr05	30304418	12469023	12571318	1.42	5973436	102295	652	101798	0.937751	0	467	0	31	101828	467	0(0.0%)	467(100.0%)	0(0.0%)	0(0.0%)	0(0.0%)	0(0.0%)	30202123	15441992	1018894(6.308%)	6416788(39.725%)	2031396(12.576%)	2159280(13.368%)	813134(5.034%)	1361443(8.428%)
SL170	Chr06	31307316	15400560	16180653	1.02	5973436	780093	5056	779919	0	0	0	0	175	0	0	0	0	0	0	0	0	30527223	15587025	1068103(6.598%)	5565760(34.38%)	2272249(14.036%)	2442122(15.085%)	830824(5.132%)	1588247(9.811%)
SL170	Chr07	29036880	11871503	12012930	1.43	5973436	141427	465	75036	0.942734	0	62590	0	3802	78837	62590	0(0.0%)	46847(74.847%)	15743(25.153%)	0(0.0%)	0(0.0%)	0(0.0%)	28895453	14930596	1048903(6.864%)	5743161(37.584%)	2282666(14.938%)	2145826(14.043%)	718923(4.705%)	1263607(8.269%)
SL170	Chr08	28524565	12908399	13053286	1.2	5973436	144887	410	62949	0.808321	414	66233	0	15292	78737	66233	167(0.251%)	54004(81.074%)	5643(8.472%)	1093(1.641%)	495(0.743%)	3418(5.131%)	28379678	15612302	1053902(6.605%)	6240571(39.114%)	2327739(14.589%)	2040226(12.787%)	729805(4.574%)	1632077(10.229%)
SL170	Chr09	23494308	2815838	3267282	7.18	5973436	451444	2783	446753	0.929881	0	4363	0	329	447081	4363	0(0.0%)	4363(100.0%)	0(0.0%)	0(0.0%)	0(0.0%)	0(0.0%)	23042864	12281833	835312(6.614%)	4580104(36.267%)	2047229(16.211%)	1655403(13.108%)	629486(4.985%)	1230447(9.743%)
SL170	Chr10	23507316	8070484	8763528	1.83	5973436	693044	3974	654510	0.799948	0	30826	0	7709	662218	30826	1241(4.026%)	22880(74.223%)	2287(7.419%)	2267(7.354%)	0(0.0%)	1419(4.603%)	22814272	12775739	949787(7.279%)	4714445(36.131%)	2072512(15.884%)	1738397(13.323%)	578331(4.432%)	1299469(9.959%)
SL170	Chr11	30916417	12274538	13508808	1.42	5973436	1234270	7220	1141441	0.893504	3134	82944	0	6752	1151418	82944	0(0.0%)	65233(76.036%)	17914(20.881%)	2151(2.507%)	172(0.2%)	0(0.0%)	29682147	17038454	1164973(6.711%)	6509894(37.501%)	2863346(16.495%)	2129018(12.265%)	761876(4.389%)	1959766(11.29%)
SL170	Chr12	27720915	11293506	11933895	1.4	5973436	640389	2832	438740	0.785802	9442	158457	0	33751	482182	158457	0(0.0%)	121078(71.347%)	21822(12.859%)	9252(5.452%)	12309(7.253%)	465(0.274%)	27080526	15509887	1331319(8.412%)	6005724(37.95%)	2596710(16.408%)	1740346(10.997%)	600492(3.794%)	1674103(10.578%)
SL173	Chr01	44651832	17249646	18088200	1.54	3472492	838554	4162	652098	0.931475	0	173680	0	12777	664874	173680	0(0.0%)	126235(72.683%)	45555(26.229%)	749(0.431%)	0(0.0%)	0(0.0%)	43813278	19656213	1036992(5.122%)	7002303(34.589%)	3277806(16.191%)	3240043(16.005%)	1209830(5.976%)	1409546(6.963%)
SL173	Chr02	37882499	13928588	14380948	1.69	3472492	452360	2587	402492	0.926207	0	46189	0	3680	406171	46189	0(0.0%)	32623(70.629%)	13566(29.371%)	0(0.0%)	0(0.0%)	0(0.0%)	37430139	17734022	1013706(5.556%)	6798420(37.261%)	2660866(14.584%)	2701468(14.806%)	996746(5.463%)	1405542(7.704%)
SL173	Chr03	39456163	21124784	21418961	1.17	3472492	294177	1556	236282	0.894587	0	51793	0	6103	242384	51793	0(0.0%)	49064(94.731%)	2418(4.669%)	0(0.0%)	0(0.0%)	0(0.0%)	39161986	17459044	1130556(6.2%)	6856190(37.602%)	2433799(13.348%)	2752834(15.098%)	1064306(5.837%)	1122341(6.155%)
SL173	Chr04	35958422	9436379	9538561	2.8	3472492	102182	368	57245	0.923339	0	41493	0	3445	60689	41493	0(0.0%)	40598(97.838%)	866(2.087%)	0(0.0%)	0(0.0%)	31(0.075%)	35856240	19851604	1148063(5.674%)	9190766(45.426%)	2628299(12.99%)	2334438(11.538%)	740707(3.661%)	2048341(10.124%)
SL173	Chr05	31398149	12724416	12820839	1.46	3472492	96423	614	95926	0.937751	0	467	0	31	95956	467	0(0.0%)	467(100.0%)	0(0.0%)	0(0.0%)	0(0.0%)	0(0.0%)	31301726	16449419	956161(5.587%)	7599520(44.405%)	2116329(12.366%)	2090957(12.218%)	817924(4.779%)	1226844(7.169%)
SL173	Chr06	32523968	15724221	15854998	1.06	3472492	130777	748	108291	0.920799	0	20706	0	1781	110071	20706	0(0.0%)	13414(64.783%)	6283(30.344%)	0(0.0%)	0(0.0%)	0(0.0%)	32393191	17452393	1064255(5.967%)	7500660(42.051%)	2370041(13.287%)	2367331(13.272%)	828229(4.643%)	1492864(8.369%)
SL173	Chr07	30202542	12704473	13096274	1.35	3472492	391801	2448	378665	0.934764	0	12280	0	857	379521	12280	0(0.0%)	11433(93.103%)	847(6.897%)	0(0.0%)	0(0.0%)	0(0.0%)	29810741	15794482	1109616(6.866%)	6544423(40.497%)	2247007(13.904%)	2173360(13.449%)	719632(4.453%)	1271046(7.865%)
SL173	Chr08	32274648	13374096	13633369	1.39	3472492	259273	400	60437	0.882944	414	175562	0	22861	83794	175562	167(0.095%)	120578(68.659%)	47027(26.778%)	1090(0.621%)	29(0.017%)	4395(2.503%)	32015375	17936471	1041531(5.324%)	8663944(44.284%)	2224178(11.369%)	2100711(10.737%)	758657(3.878%)	1562684(7.987%)
SL173	Chr09	24245641	3043242	3235752	6.9	3472492	192510	627	102645	0.922129	0	82868	0	6998	109642	82868	0(0.0%)	76589(92.423%)	0(0.0%)	0(0.0%)	0(0.0%)	6215(7.5%)	24053131	13283181	862147(6.262%)	5618390(40.808%)	1900843(13.806%)	1550270(11.26%)	620193(4.505%)	1169885(8.497%)
SL173	Chr10	25746102	9638020	9776910	1.66	3472492	138890	348	57039	0.76846	1830	62900	0	17122	75990	62900	3680(5.8%)	35665(56.211%)	14171(22.335%)	5951(9.379%)	0(0.0%)	1436(2.263%)	25607212	15130926	871629(5.561%)	7159928(45.677%)	2009262(12.818%)	1830221(11.676%)	554204(3.536%)	1252793(7.992%)
SL173	Chr11	31426415	12577125	12897743	1.47	3472492	320618	936	149093	0.909938	1470	156078	0	13978	164514	156078	0(0.0%)	120888(77.441%)	31350(20.083%)	821(0.526%)	172(0.11%)	1777(1.138%)	31105797	18520188	1127571(5.925%)	8004438(42.063%)	2913729(15.311%)	2098817(11.029%)	763519(4.012%)	1973224(10.369%)
SL173	Chr12	29052826	12160695	12415622	1.37	3472492	254927	799	126161	0.921874	0	118707	0	10060	136220	118707	0(0.0%)	107948(90.794%)	10474(8.81%)	0(0.0%)	0(0.0%)	0(0.0%)	28797899	16660751	1167816(6.667%)	7505220(42.844%)	2486208(14.193%)	1749831(9.989%)	589043(3.363%)	1683774(9.612%)
SL174	Chr01	44733525	17436042	18081352	1.53	3961010	645310	3120	490547	0.799818	0	123783	0	30981	521527	123783	0(0.0%)	103468(83.588%)	19241(15.544%)	749(0.605%)	0(0.0%)	0(0.0%)	44088215	19930277	977463(4.764%)	7219582(35.19%)	3215426(15.673%)	3269846(15.938%)	1221509(5.954%)	1536055(7.487%)
SL174	Chr02	38678118	14043727	14617532	1.71	3961010	573805	3226	501903	0.949376	0	68263	0	3640	505542	68263	0(0.0%)	54699(80.13%)	13564(19.87%)	0(0.0%)	0(0.0%)	0(0.0%)	38104313	18358526	1025816(5.441%)	7407118(39.286%)	2733230(14.497%)	2675297(14.189%)	984286(5.22%)	1367860(7.255%)
SL174	Chr03	39408416	21181332	21495798	1.18	3961010	314466	1714	260535	0.958689	0	51704	0	2228	262762	51704	0(0.0%)	48975(94.722%)	2418(4.677%)	0(0.0%)	0(0.0%)	0(0.0%)	39093950	17571625	1200655(6.63%)	6772798(37.398%)	2464056(13.606%)	2782732(15.366%)	1069828(5.907%)	1120362(6.186%)
SL174	Chr04	38712707	10554461	10720566	2.65	3961010	166105	447	69598	0.967371	0	93359	0	3149	72746	93359	0(0.0%)	77528(83.041%)	15673(16.788%)	0(0.0%)	0(0.0%)	160(0.171%)	38546602	22312059	1145319(5.047%)	11340690(49.976%)	2682656(11.822%)	2378680(10.482%)	760252(3.35%)	2229432(9.825%)
SL174	Chr05	32515161	13690641	13942275	1.36	3961010	251634	917	144258	0.96828	0	103971	0	3406	147663	103971	0(0.0%)	62004(59.636%)	41967(40.364%)	0(0.0%)	0(0.0%)	0(0.0%)	32263527	17429001	929246(5.122%)	8595210(47.377%)	2107173(11.615%)	2109813(11.629%)	790394(4.357%)	1268539(6.992%)
SL174	Chr06	32912143	15955323	16065181	1.06	3961010	109858	566	82176	0.933678	0	25847	0	1836	84011	25847	0(0.0%)	18555(71.788%)	6283(24.308%)	0(0.0%)	0(0.0%)	0(0.0%)	32802285	17839546	1088693(5.97%)	7727116(42.376%)	2423977(13.293%)	2440721(13.385%)	836203(4.586%)	1504398(8.25%)
SL174	Chr07	30619746	12766511	13227000	1.36	3961010	460489	2889	446672	0.950138	0	13129	0	689	447360	13129	0(0.0%)	13129(100.0%)	0(0.0%)	0(0.0%)	0(0.0%)	0(0.0%)	30159257	16157400	1118625(6.756%)	6994692(42.242%)	2305735(13.925%)	2144975(12.954%)	708837(4.281%)	1155382(6.978%)
SL174	Chr08	31992028	14194155	14434369	1.24	3961010	240214	403	60951	0.854204	414	153128	0	25722	87169	153128	167(0.109%)	98184(64.095%)	47029(30.701%)	1090(0.712%)	29(0.019%)	4395(2.869%)	31751814	18055392	1059119(5.496%)	8680410(45.045%)	2310260(11.989%)	2093332(10.863%)	762520(3.957%)	1538510(7.984%)
SL174	Chr09	24487138	3192704	3369000	6.61	3961010	176296	575	94044	0.920623	0	75724	0	6529	100572	75724	0(0.0%)	69446(91.709%)	0(0.0%)	0(0.0%)	0(0.0%)	6215(8.207%)	24310842	13496705	804818(5.741%)	5973930(42.616%)	1894312(13.513%)	1565690(11.169%)	620680(4.428%)	1075487(7.672%)
SL174	Chr10	25977060	9152046	9371797	1.81	3961010	219751	494	81770	0.846335	950	116779	0	20253	102972	116779	3746(3.204%)	65940(56.4%)	28302(24.207%)	6468(5.532%)	0(0.0%)	8423(7.204%)	25757309	15238628	894916(5.665%)	7205581(45.61%)	2103470(13.314%)	1793797(11.354%)	559912(3.544%)	1247853(7.899%)
SL174	Chr11	38850582	17452001	17826426	1.2	3961010	374425	1078	168105	0.917997	1470	189402	0	15449	185115	189402	0(0.0%)	147293(77.767%)	38035(20.082%)	820(0.433%)	172(0.091%)	1680(0.887%)	38476157	23980812	1341910(5.368%)	11498621(45.997%)	3468471(13.875%)	2565882(10.264%)	872843(3.492%)	2388243(9.554%)
SL174	Chr12	28180277	11269372	11698029	1.46	3961010	428657	757	118911	0.841861	10171	260764	0	38812	168059	260764	0(0.0%)	219372(80.421%)	33680(12.347%)	9064(3.323%)	5706(2.092%)	469(0.172%)	27751620	15893596	1030012(6.129%)	7168002(42.655%)	2314871(13.775%)	1632254(9.713%)	599540(3.568%)	1709249(10.171%)
SL177	Chr01	44402028	17283358	18023607	1.53	4824499	740249	2840	448746	0.591728	852	172491	0	118161	567845	172491	0(0.0%)	145979(84.63%)	15970(9.258%)	4645(2.693%)	0(0.0%)	3539(2.052%)	43661779	19499079	1109723(5.522%)	6261050(31.156%)	3364180(16.741%)	3425114(17.044%)	1252227(6.231%)	1506804(7.498%)
SL177	Chr02	36958829	13685310	14258319	1.66	4824499	573009	3124	489054	0.585914	0	49191	0	34765	523818	49191	0(0.0%)	35346(71.855%)	13357(27.153%)	0(0.0%)	0(0.0%)	0(0.0%)	36385820	16651155	1123775(6.551%)	5323738(31.036%)	2829272(16.494%)	2751698(16.042%)	956979(5.579%)	1461776(8.522%)
SL177	Chr03	38594781	21096173	21522892	1.24	4824499	426719	1498	228422	0.847936	143	168144	0	30011	258575	168144	2528(1.503%)	109938(65.362%)	46117(27.418%)	1859(1.105%)	4917(2.923%)	838(0.498%)	38168062	16688446	1196386(6.95%)	5902681(34.29%)	2548836(14.807%)	2770273(16.093%)	1040959(6.047%)	1119224(6.502%)
SL177	Chr04	35464238	9271152	9385926	2.81	4824499	114774	316	49410	0.912277	0	59631	0	5734	55143	59631	0(0.0%)	42407(71.116%)	17192(28.831%)	0(0.0%)	0(0.0%)	32(0.054%)	35349464	19176151	1270160(6.486%)	8367320(42.728%)	2886381(14.739%)	2282297(11.655%)	772915(3.947%)	1821359(9.301%)
SL177	Chr05	31455137	12915644	13009652	1.43	4824499	94008	570	89032	0.976894	0	4862	0	115	89146	4862	0(0.0%)	4862(100.0%)	0(0.0%)	0(0.0%)	0(0.0%)	0(0.0%)	31361129	16467768	1057518(6.106%)	7437259(42.943%)	2099910(12.125%)	2175211(12.56%)	821939(4.746%)	1251664(7.227%)
SL177	Chr06	31989784	15091080	15937461	1.06	4824499	846381	5482	846101	0	0	0	0	281	0	0	0	0	0	0	0	0	31143403	16063864	1060208(6.346%)	6103561(36.535%)	2269048(13.582%)	2390789(14.311%)	841452(5.037%)	1570137(9.399%)
SL177	Chr07	30002421	12229395	12436531	1.44	4824499	207136	1244	201091	0.937479	0	5668	0	378	201468	5668	0(0.0%)	5668(100.0%)	0(0.0%)	0(0.0%)	0(0.0%)	0(0.0%)	29795285	15676319	1139689(7.086%)	6146803(38.217%)	2340362(14.551%)	2231667(13.875%)	708727(4.406%)	1377377(8.564%)
SL177	Chr08	29662327	13205690	13357433	1.23	4824499	151743	402	61756	0.822865	414	74048	0	15526	77778	74048	167(0.225%)	54048(72.933%)	13366(18.036%)	1092(1.474%)	363(0.49%)	3401(4.589%)	29510584	16712071	1088940(6.385%)	7333829(43.005%)	2188735(12.835%)	2085777(12.231%)	762323(4.47%)	1634767(9.586%)
SL177	Chr09	23223186	3077626	3366874	6.45	4824499	289248	1731	281502	0.943075	0	7306	0	441	281942	7306	0(0.0%)	7306(100.0%)	0(0.0%)	0(0.0%)	0(0.0%)	0(0.0%)	22933938	12340779	866481(6.848%)	4852835(38.355%)	1933341(15.28%)	1599261(12.64%)	602255(4.76%)	1211327(9.574%)
SL177	Chr10	24258077	8840274	8941913	1.73	4824499	101639	281	45928	0.718463	1527	40027	0	14158	61796	40027	769(1.9%)	26287(64.956%)	5154(12.736%)	4894(12.093%)	0(0.0%)	1521(3.758%)	24156438	14026686	912954(6.381%)	6022701(42.094%)	2106413(14.722%)	1742488(12.179%)	575345(4.021%)	1245722(8.707%)
SL177	Chr11	31029406	12576535	13352448	1.41	4824499	775913	4682	737957	0.745396	3134	28293	0	6530	747712	28293	0(0.0%)	22738(73.016%)	5988(19.229%)	2151(6.907%)	172(0.552%)	0(0.0%)	30253493	17680541	1238530(6.882%)	6961739(38.683%)	2903501(16.133%)	2132019(11.847%)	771264(4.286%)	1983460(11.021%)
SL177	Chr12	27594627	11275917	11779597	1.4	4824499	503680	1358	214566	0.766328	17398	221557	0	50160	282337	221557	0(0.0%)	188665(83.65%)	12066(5.35%)	8977(3.98%)	5455(2.419%)	152(0.067%)	27090947	15594400	1144100(7.188%)	6457297(40.57%)	2446039(15.368%)	1706508(10.722%)	603197(3.79%)	1733927(10.894%)
SL187	Chr01	44094086	17179662	18096373	1.51	6286242	916711	2805	442978	0.666572	852	315778	0	157104	601104	315778	0(0.0%)	272819(86.396%)	18802(5.954%)	10990(3.48%)	0(0.0%)	8795(2.785%)	43177375	19182245	1102025(5.569%)	6081626(30.734%)	3377042(17.066%)	3321691(16.786%)	1211799(6.124%)	1567477(7.921%)
SL187	Chr02	36271866	13502414	14075865	1.64	6286242	573451	3288	511718	0.652963	0	40310	0	21424	533141	40310	0(0.0%)	26451(65.619%)	13371(33.17%)	0(0.0%)	0(0.0%)	0(0.0%)	35698415	16111561	1040009(6.263%)	5156345(31.053%)	2709961(16.32%)	2714713(16.349%)	944636(5.689%)	1354720(8.159%)
SL187	Chr03	37821954	19957462	20388595	1.14	6286242	431133	2179	336100	0.967517	0	91947	0	3087	339186	91947	0(0.0%)	83808(91.148%)	7743(8.421%)	0(0.0%)	0(0.0%)	0(0.0%)	37390821	15910087	1223634(7.444%)	5322599(32.381%)	2403551(14.623%)	2747952(16.718%)	1042136(6.34%)	1086298(6.609%)
SL187	Chr04	35845586	9911781	10031268	2.6	6286242	119487	321	50367	0.891162	0	61598	0	7523	57889	61598	0(0.0%)	43195(70.124%)	18371(29.824%)	0(0.0%)	0(0.0%)	32(0.052%)	35726099	19719515	1284065(6.385%)	8993717(44.722%)	2695839(13.405%)	2343390(11.653%)	756819(3.763%)	1901010(9.453%)
SL187	Chr05	30343877	12556537	12627952	1.41	6286242	71415	454	70918	0.937751	0	467	0	31	70948	467	0(0.0%)	467(100.0%)	0(0.0%)	0(0.0%)	0(0.0%)	0(0.0%)	30272462	15545165	1052576(6.482%)	6510089(40.089%)	2031422(12.51%)	2162038(13.314%)	816929(5.031%)	1345634(8.286%)
SL187	Chr06	32150504	15073039	15828538	1.08	6286242	755499	4294	662280	0.948895	0	88456	0	4764	667043	88456	0(0.0%)	87912(99.385%)	0(0.0%)	0(0.0%)	0(0.0%)	0(0.0%)	31395005	16304592	1114310(6.584%)	6169699(36.453%)	2270109(13.413%)	2450254(14.477%)	841071(4.969%)	1630568(9.634%)
SL187	Chr07	30144676	13095061	13351613	1.28	6286242	256552	1432	232439	0.935141	0	22550	0	1564	234002	22550	0(0.0%)	22550(100.0%)	0(0.0%)	0(0.0%)	0(0.0%)	0(0.0%)	29888124	15536129	1151917(7.088%)	5966673(36.712%)	2331435(14.345%)	2190317(13.477%)	719936(4.43%)	1427697(8.784%)
SL187	Chr08	29814206	12734103	12874445	1.33	6286242	140342	440	67872	0.917871	0	66519	0	5952	73823	66519	0(0.0%)	57213(86.007%)	8693(13.068%)	0(0.0%)	0(0.0%)	0(0.0%)	29673864	16840188	1081299(6.29%)	7474140(43.478%)	2251237(13.096%)	2083765(12.122%)	759472(4.418%)	1618368(9.414%)
SL187	Chr09	23512728	2705348	3727672	7.31	6286242	1022324	5408	871494	0.675604	5703	101902	0	43226	920471	101902	0(0.0%)	74909(70.083%)	23754(22.224%)	2435(2.278%)	180(0.168%)	1096(1.025%)	22490404	11684152	845939(7.03%)	4063510(33.769%)	2042917(16.977%)	1580794(13.137%)	629507(5.231%)	1241376(10.316%)
SL187	Chr10	23408640	8057363	8252898	1.88	6286242	195535	930	150043	0.922274	0	41957	0	3536	153578	41957	0(0.0%)	34258(81.65%)	7699(18.35%)	0(0.0%)	0(0.0%)	0(0.0%)	23213105	13234662	882783(6.538%)	5311050(39.337%)	2037919(15.094%)	1741043(12.895%)	582151(4.312%)	1232102(9.126%)
SL187	Chr11	31516176	12717698	13799637	1.39	6286242	1081939	6162	972127	0.911741	3134	100121	0	6558	981910	100121	0(0.0%)	82410(80.034%)	17914(17.397%)	2151(2.089%)	172(0.167%)	0(0.0%)	30434237	17672262	1233563(6.853%)	6684014(37.131%)	3084230(17.133%)	2165675(12.031%)	792105(4.4%)	2048687(11.381%)
SL187	Chr12	28036556	11943861	12665715	1.29	6286242	721854	3459	525111	0.77671	16387	152813	0	27544	569291	152813	0(0.0%)	116686(69.81%)	21970(13.144%)	9267(5.544%)	13808(8.261%)	464(0.278%)	27314702	15698757	1297274(8.094%)	6133320(38.269%)	2574972(16.067%)	1737968(10.844%)	602536(3.76%)	1793348(11.19%)
SL190	Chr01	43879521	17122249	17820972	1.52	4764296	698723	2401	391488	0.862451	7795	264976	0	34465	433705	264976	8810(3.258%)	210230(77.742%)	41180(15.228%)	4301(1.59%)	0(0.0%)	3727(1.378%)	43180798	18977842	1020327(5.21%)	6179290(31.555%)	3295681(16.83%)	3266534(16.681%)	1219948(6.23%)	1529575(7.811%)
SL190	Chr02	37451096	13871062	14380874	1.66	4764296	509812	2794	434283	0.909149	0	68668	0	6862	441144	68668	0(0.0%)	55103(80.246%)	13565(19.754%)	0(0.0%)	0(0.0%)	0(0.0%)	36941284	17119155	948881(5.383%)	6091392(34.554%)	2782819(15.786%)	2760916(15.661%)	988546(5.608%)	1374352(7.796%)
SL190	Chr03	39352078	21070762	21625959	1.19	4764296	555197	2785	425582	0.90046	0	116714	0	12902	438483	116714	0(0.0%)	83264(71.34%)	33140(28.394%)	0(0.0%)	0(0.0%)	0(0.0%)	38796881	17348231	1087003(6.076%)	6790218(37.954%)	2446419(13.674%)	2741227(15.322%)	1061464(5.933%)	1140849(6.377%)
SL190	Chr04	35232568	8940120	8964932	2.94	4764296	24812	101	15851	0.959496	0	8599	0	363	16213	8599	0(0.0%)	7770(90.359%)	829(9.641%)	0(0.0%)	0(0.0%)	0(0.0%)	35207756	19352097	1211080(6.142%)	8857937(44.924%)	2534189(12.852%)	2297612(11.652%)	748684(3.797%)	2029096(10.291%)
SL190	Chr05	31699455	12961522	13312851	1.42	4764296	351329	1762	276283	0.918744	0	68949	0	6098	282380	68949	0(0.0%)	55668(80.738%)	13281(19.262%)	0(0.0%)	0(0.0%)	0(0.0%)	31348126	16497676	977216(5.668%)	7557572(43.833%)	2206453(12.797%)	2125791(12.329%)	792494(4.596%)	1230971(7.139%)
SL190	Chr06	31537543	14677909	15197713	1.11	4764296	519804	2744	421197	0.8161	438	80474	0	17696	439330	80474	0(0.0%)	40369(50.154%)	38754(48.148%)	616(0.765%)	0(0.0%)	89(0.111%)	31017739	16061808	1035142(6.29%)	6180560(37.557%)	2340118(14.22%)	2352998(14.298%)	819550(4.98%)	1486215(9.031%)
SL190	Chr07	30832630	13204389	13790819	1.29	4764296	586430	3738	578251	0.962836	0	7876	0	304	578554	7876	0(0.0%)	7029(89.246%)	847(10.754%)	0(0.0%)	0(0.0%)	0(0.0%)	30246200	16391830	1105415(6.601%)	7216248(43.093%)	2301213(13.742%)	2130867(12.725%)	688577(4.112%)	1236189(7.382%)
SL190	Chr08	28485814	12883483	13099420	1.19	4764296	215937	584	88450	0.869298	0	110825	0	16663	105195	110825	167(0.151%)	86228(77.766%)	18001(16.235%)	1096(0.988%)	29(0.026%)	4136(3.73%)	28269877	15584569	1012167(6.348%)	6640592(41.647%)	2162597(13.563%)	2029720(12.73%)	753762(4.727%)	1421448(8.915%)
SL190	Chr09	24282945	2819432	3038700	7.53	4764296	219268	983	157413	0.949576	0	58737	0	3119	160531	58737	0(0.0%)	54038(92.0%)	0(0.0%)	0(0.0%)	0(0.0%)	4699(8.0%)	24063677	12976615	801292(5.821%)	5590029(40.606%)	2023915(14.702%)	1580205(11.479%)	609285(4.426%)	1102632(8.009%)
SL190	Chr10	25643288	9554211	9966675	1.64	4764296	412464	1066	168092	0.87355	1369	213472	0	29532	198992	213472	2998(1.402%)	150935(70.6%)	51533(24.105%)	3888(1.819%)	0(0.0%)	1955(0.914%)	25230824	14766436	892648(5.835%)	6702281(43.811%)	2063394(13.488%)	1737118(11.355%)	575110(3.759%)	1356758(8.869%)
SL190	Chr11	31776207	12710471	12936875	1.48	4764296	226404	641	101244	0.881481	1470	110327	0	13364	116077	110327	0(0.0%)	77756(70.478%)	28417(25.757%)	823(0.746%)	172(0.156%)	1778(1.612%)	31549803	19047109	1199910(6.154%)	8309457(42.617%)	3027713(15.528%)	2136132(10.956%)	783596(4.019%)	1966023(10.083%)
SL190	Chr12	26174836	10704367	11148483	1.4	4764296	444116	1220	191740	0.816418	7994	206045	0	38338	238199	206045	0(0.0%)	178802(86.407%)	11408(5.513%)	7647(3.695%)	2712(1.311%)	92(0.044%)	25730720	14306029	1018017(6.862%)	5872171(39.579%)	2310106(15.57%)	1627837(10.972%)	563697(3.799%)	1524486(10.275%)
SL202	Chr01	43684421	16896133	17462734	1.55	5928708	566601	1829	286287	0.503048	852	141012	0	138451	425646	141012	0(0.0%)	122959(87.198%)	9167(6.501%)	3861(2.738%)	0(0.0%)	3315(2.351%)	43117820	19013929	1134854(5.784%)	5865248(29.894%)	3369011(17.171%)	3324336(16.944%)	1228932(6.264%)	1550760(7.904%)
SL202	Chr02	36531795	13662575	14197854	1.63	5928708	535279	3015	468903	0.740437	0	49148	0	17229	486131	49148	0(0.0%)	35303(71.83%)	13357(27.177%)	0(0.0%)	0(0.0%)	0(0.0%)	35996516	16319785	1047735(6.227%)	5190270(30.849%)	2742282(16.299%)	2766460(16.443%)	948529(5.638%)	1409596(8.378%)
SL202	Chr03	37700149	20143077	20628243	1.18	5928708	485166	2917	450416	0.964433	0	33515	0	1236	451651	33515	0(0.0%)	33515(100.0%)	0(0.0%)	0(0.0%)	0(0.0%)	0(0.0%)	37214983	15733450	1204458(7.398%)	5200447(31.943%)	2408095(14.791%)	2711464(16.655%)	1046115(6.426%)	1082366(6.648%)
SL202	Chr04	35568641	9947304	10068655	2.56	5928708	121351	324	50636	0.916836	0	64835	0	5881	56516	64835	0(0.0%)	47610(73.433%)	17193(26.518%)	0(0.0%)	0(0.0%)	32(0.049%)	35447290	19373353	1258988(6.366%)	8582739(43.395%)	2834125(14.33%)	2315891(11.709%)	772131(3.904%)	1876122(9.486%)
SL202	Chr05	30411410	12517497	12621886	1.42	5928708	104389	665	103892	0.937751	0	467	0	31	103922	467	0(0.0%)	467(100.0%)	0(0.0%)	0(0.0%)	0(0.0%)	0(0.0%)	30307021	15526966	1039981(6.409%)	6460992(39.816%)	2041983(12.584%)	2156557(13.29%)	815621(5.026%)	1361769(8.392%)
SL202	Chr06	31396080	15459612	16485741	1.04	5928708	1026129	6622	1021543	0.952692	0	4370	0	217	1021759	4370	0(0.0%)	4370(100.0%)	0(0.0%)	0(0.0%)	0(0.0%)	0(0.0%)	30369951	15404196	1035424(6.47%)	5411361(33.812%)	2285348(14.28%)	2423002(15.14%)	841145(5.256%)	1602794(10.015%)
SL202	Chr07	29667241	12053557	12273320	1.44	5928708	219763	1279	206610	0.972708	0	12795	0	359	206968	12795	0(0.0%)	12795(100.0%)	0(0.0%)	0(0.0%)	0(0.0%)	0(0.0%)	29447478	15470281	1104519(6.978%)	6029468(38.091%)	2332358(14.735%)	2173497(13.731%)	720852(4.554%)	1381051(8.725%)
SL202	Chr08	28666533	13062067	13217879	1.18	5928708	155812	440	67355	0.799555	414	70727	0	17317	85168	70727	167(0.236%)	58448(82.573%)	5624(7.945%)	1094(1.546%)	363(0.513%)	3418(4.829%)	28510721	15729252	1051237(6.541%)	6384250(39.723%)	2308610(14.364%)	2060483(12.82%)	747325(4.65%)	1580064(9.831%)
SL202	Chr09	23225514	2730627	3182985	7.34	5928708	452358	2790	447656	0.92728	0	4361	0	342	447997	4361	0(0.0%)	4361(100.0%)	0(0.0%)	0(0.0%)	0(0.0%)	0(0.0%)	22773156	12056015	838038(6.754%)	4453824(35.893%)	1993393(16.065%)	1613202(13.001%)	636893(5.133%)	1214103(9.784%)
SL202	Chr10	23823037	8272126	8612949	1.84	5928708	340823	1714	274741	0.922446	0	60958	0	5125	279865	60958	0(0.0%)	38489(63.14%)	22328(36.628%)	0(0.0%)	0(0.0%)	0(0.0%)	23482214	13513992	946439(6.867%)	5370207(38.962%)	2189600(15.886%)	1739901(12.623%)	569021(4.128%)	1249050(9.062%)
SL202	Chr11	29958255	12215827	13481951	1.35	5928708	1266124	7347	1159779	0.903353	3134	96068	0	7144	1170148	96068	0(0.0%)	78358(79.217%)	17913(18.109%)	2151(2.175%)	172(0.174%)	0(0.0%)	28692131	16381643	1195282(7.158%)	6023301(36.072%)	2812766(16.845%)	2121970(12.708%)	713429(4.273%)	1918564(11.49%)
SL202	Chr12	27841241	11386956	12041869	1.39	5928708	654913	2922	453954	0.736614	19056	148030	0	33874	507175	148030	0(0.0%)	110906(68.109%)	20632(12.67%)	9927(6.096%)	14156(8.693%)	494(0.303%)	27186328	15564413	1342005(8.446%)	6003380(37.785%)	2614056(16.453%)	1750658(11.018%)	598207(3.765%)	1682565(10.59%)
SL203	Chr01	43294707	17260443	17875914	1.47	5022329	615471	1978	311797	0.478242	852	145230	0	157593	470298	145230	0(0.0%)	120165(82.741%)	15990(11.01%)	4098(2.822%)	0(0.0%)	3289(2.265%)	42679236	18488345	1050868(5.506%)	5728187(30.012%)	3306007(17.321%)	3233504(16.941%)	1216381(6.373%)	1509242(7.907%)
SL203	Chr02	37786623	13805812	14321910	1.7	5022329	516098	2755	428402	0.944285	0	82811	0	4886	433287	82811	0(0.0%)	69245(83.618%)	13566(16.382%)	0(0.0%)	0(0.0%)	0(0.0%)	37270525	17482724	990371(5.507%)	6490196(36.087%)	2708897(15.062%)	2740335(15.237%)	990140(5.505%)	1392609(7.743%)
SL203	Chr03	39155312	20980474	21558239	1.19	5022329	577765	2833	433175	0.960281	0	138848	0	5743	438917	138848	0(0.0%)	105398(75.909%)	33140(23.868%)	0(0.0%)	0(0.0%)	0(0.0%)	38577547	17102971	1077710(6.111%)	6629633(37.59%)	2413494(13.684%)	2687440(15.238%)	1062591(6.025%)	1139097(6.459%)
SL203	Chr04	35786269	9155487	9180621	2.91	5022329	25134	103	16172	0.959946	0	8604	0	359	16530	8604	0(0.0%)	7775(90.365%)	829(9.635%)	0(0.0%)	0(0.0%)	0(0.0%)	35761135	19731561	1298322(6.46%)	8881322(44.189%)	2740543(13.636%)	2322917(11.558%)	742171(3.693%)	2047911(10.189%)
SL203	Chr05	31630812	12786718	13150484	1.45	5022329	363766	1719	272400	0.92679	0	84678	0	6689	279088	84678	0(0.0%)	63609(75.119%)	21069(24.881%)	0(0.0%)	0(0.0%)	0(0.0%)	31267046	16584540	955017(5.557%)	7744027(45.063%)	2093127(12.18%)	2143678(12.474%)	805026(4.684%)	1249124(7.269%)
SL203	Chr06	32034475	14987374	15484856	1.1	5022329	497482	2651	405922	0.846201	438	77479	0	13644	420003	77479	0(0.0%)	37545(48.426%)	38619(49.811%)	616(0.795%)	0(0.0%)	89(0.115%)	31536993	16677749	1047492(6.135%)	6728557(39.408%)	2326179(13.624%)	2418510(14.165%)	816888(4.784%)	1514565(8.871%)
SL203	Chr07	30299334	12498503	13028286	1.38	5022329	529783	3358	519291	0.909368	0	9542	0	951	520241	9542	0(0.0%)	8695(91.123%)	847(8.877%)	0(0.0%)	0(0.0%)	0(0.0%)	29769551	15747656	1141559(7.083%)	6145262(38.128%)	2451545(15.21%)	2174003(13.488%)	732487(4.545%)	1364362(8.465%)
SL203	Chr08	29594203	13450610	13703880	1.18	5022329	253270	385	58146	0.881194	414	171943	0	22768	81410	171943	167(0.097%)	116961(68.0%)	47028(27.342%)	1090(0.634%)	29(0.017%)	4394(2.555%)	29340933	16702212	1006026(5.903%)	7791339(45.717%)	2115077(12.41%)	2067387(12.131%)	732963(4.301%)	1425443(8.364%)
SL203	Chr09	24789549	2822979	3032564	7.71	5022329	209585	936	153138	0.96131	0	54264	0	2184	155321	54264	0(0.0%)	49566(91.342%)	0(0.0%)	0(0.0%)	0(0.0%)	4698(8.658%)	24579964	13742522	848785(6.036%)	5871423(41.754%)	2064940(14.684%)	1569490(11.161%)	624189(4.439%)	1159824(8.248%)
SL203	Chr10	25437882	9440788	9872454	1.65	5022329	431666	999	159886	0.878111	1369	238654	0	31758	193012	238654	2998(1.255%)	169413(70.893%)	54347(22.742%)	7101(2.972%)	0(0.0%)	1955(0.818%)	25006216	14541295	893655(5.931%)	6589688(43.736%)	2033647(13.497%)	1693869(11.242%)	573711(3.808%)	1351145(8.968%)
SL203	Chr11	32578204	12725545	13259544	1.52	5022329	533999	2118	331040	0.932317	1470	189223	0	12267	344750	189223	0(0.0%)	138712(73.296%)	46635(24.642%)	822(0.434%)	172(0.091%)	1777(0.939%)	32044205	19222367	1194693(6.042%)	8298032(41.969%)	2928512(14.812%)	2106678(10.655%)	757431(3.831%)	2286143(11.563%)
SL203	Chr12	26602835	11663315	12131625	1.24	5022329	468310	1139	180383	0.82779	14503	238344	0	35081	229984	238344	0(0.0%)	201217(82.551%)	21966(9.012%)	10957(4.495%)	4294(1.762%)	217(0.089%)	26134525	14828078	1131824(7.488%)	6127337(40.538%)	2415872(15.983%)	1674319(11.077%)	600323(3.972%)	1442990(9.547%)
XL628S	Chr01	45167097	17109290	17701502	1.61	3501654	592212	2831	446282	0.858954	0	125348	0	20583	466864	125348	0(0.0%)	102297(81.61%)	22726(18.13%)	0(0.0%)	0(0.0%)	0(0.0%)	44574885	20469504	1046796(4.968%)	7624194(36.183%)	3297736(15.651%)	3315420(15.734%)	1198561(5.688%)	1498297(7.111%)
XL628S	Chr02	37981481	13878809	14457959	1.69	3501654	579150	3373	524608	0.972352	0	53035	0	1508	526115	53035	0(0.0%)	39469(74.421%)	13566(25.579%)	0(0.0%)	0(0.0%)	0(0.0%)	37402331	17734203	1005966(5.518%)	6828442(37.459%)	2698247(14.802%)	2672101(14.658%)	978252(5.366%)	1381777(7.58%)
XL628S	Chr03	39745979	21183629	21493653	1.16	3501654	310024	1642	249862	0.918904	0	55284	0	4879	254740	55284	0(0.0%)	52555(95.064%)	2418(4.374%)	0(0.0%)	0(0.0%)	0(0.0%)	39435955	17659909	1180436(6.399%)	6948811(37.666%)	2424492(13.142%)	2778113(15.059%)	1042998(5.654%)	1098967(5.957%)
XL628S	Chr04	37252336	10423384	10522491	2.56	3501654	99107	348	54137	0.922639	0	41492	0	3479	57615	41492	0(0.0%)	40597(97.838%)	866(2.087%)	0(0.0%)	0(0.0%)	31(0.075%)	37153229	20983789	1137405(5.32%)	10189900(47.658%)	2722662(12.734%)	2343764(10.962%)	737107(3.447%)	2093523(9.791%)
XL628S	Chr05	31166862	12453393	12564844	1.49	3501654	111451	710	110923	0.882798	0	467	0	62	110984	467	0(0.0%)	467(100.0%)	0(0.0%)	0(0.0%)	0(0.0%)	0(0.0%)	31055411	16259584	965982(5.711%)	7494645(44.307%)	2068177(12.227%)	2068147(12.226%)	814234(4.814%)	1216777(7.193%)
XL628S	Chr06	32759830	16198411	16299439	1.02	3501654	101028	579	86972	0.916554	0	12884	0	1173	88144	12884	0(0.0%)	4713(36.58%)	7161(55.581%)	0(0.0%)	0(0.0%)	0(0.0%)	32658802	17795667	1049805(5.769%)	7977682(43.841%)	2306559(12.676%)	2332858(12.82%)	810654(4.455%)	1520114(8.354%)
XL628S	Chr07	30936566	13007696	13529421	1.34	3501654	521725	3263	504380	0.962009	0	16687	0	659	505038	16687	0(0.0%)	15840(94.924%)	847(5.076%)	0(0.0%)	0(0.0%)	0(0.0%)	30414841	16447819	1121036(6.675%)	7347524(43.75%)	2205951(13.135%)	2138767(12.735%)	709164(4.223%)	1212330(7.219%)
XL628S	Chr08	31743793	13598648	13728737	1.32	3501654	130089	409	62747	0.949512	0	63943	0	3400	66146	63943	0(0.0%)	40383(63.155%)	22947(35.887%)	0(0.0%)	0(0.0%)	0(0.0%)	31613704	17689113	1010106(5.314%)	8285646(43.589%)	2313386(12.17%)	2140641(11.261%)	780019(4.104%)	1516314(7.977%)
XL628S	Chr09	24414475	3062184	3255458	6.91	3501654	193274	631	103199	0.921333	0	82990	0	7086	110284	82990	0(0.0%)	76711(92.434%)	0(0.0%)	0(0.0%)	0(0.0%)	6215(7.489%)	24221201	13447606	858675(6.154%)	5894720(42.249%)	1852551(13.278%)	1555377(11.148%)	612008(4.386%)	1131309(8.108%)
XL628S	Chr10	26521355	10006133	10234911	1.63	3501654	228778	511	84399	0.864683	950	124843	0	18587	103935	124843	3984(3.188%)	72461(57.979%)	29359(23.491%)	6443(5.155%)	0(0.0%)	8423(6.74%)	26292577	15895103	976837(6.038%)	7496853(46.338%)	2201184(13.605%)	1859894(11.496%)	563584(3.483%)	1348493(8.335%)
XL628S	Chr11	31999728	13354310	13730000	1.37	3501654	375690	1334	208285	0.954876	0	159852	0	7554	215838	159852	0(0.0%)	118792(74.314%)	40477(25.322%)	75(0.047%)	0(0.0%)	0(0.0%)	31624038	19011451	1083198(5.545%)	8518222(43.602%)	2879331(14.739%)	2165391(11.084%)	731280(3.743%)	1988023(10.176%)
XL628S	Chr12	28167500	11338553	11597679	1.46	3501654	259126	803	126641	0.924543	0	122489	0	9997	136637	122489	0(0.0%)	111723(91.072%)	10481(8.544%)	0(0.0%)	0(0.0%)	0(0.0%)	27908374	16012500	1073363(6.355%)	7293874(43.183%)	2349411(13.91%)	1636787(9.691%)	625346(3.702%)	1600005(9.473%)
YCW03	Chr01	43579530	16759489	17446399	1.56	6311731	686910	2295	359966	0.453394	852	148235	0	177858	538732	148235	0(0.0%)	124538(84.014%)	15988(10.786%)	3518(2.373%)	0(0.0%)	3099(2.091%)	42892620	18842533	1104587(5.682%)	5772453(29.693%)	3377219(17.372%)	3317502(17.065%)	1211277(6.231%)	1544234(7.943%)
YCW03	Chr02	36164854	13580387	14116780	1.62	6311731	536393	3124	485399	0.523934	0	26718	0	24277	509675	26718	0(0.0%)	13781(51.579%)	12449(46.594%)	0(0.0%)	0(0.0%)	0(0.0%)	35628461	16011233	1063158(6.439%)	5010100(30.343%)	2704903(16.382%)	2724161(16.499%)	947194(5.737%)	1352075(8.189%)
YCW03	Chr03	37380420	19910035	20409398	1.17	6311731	499363	3041	468939	0.95645	0	29100	0	1325	470263	29100	0(0.0%)	29100(100.0%)	0(0.0%)	0(0.0%)	0(0.0%)	0(0.0%)	36881057	15406018	1189222(7.454%)	4922859(30.855%)	2406818(15.085%)	2705754(16.959%)	1045600(6.553%)	1045697(6.554%)
YCW03	Chr04	35455368	9735922	9876824	2.63	6311731	140902	381	59818	0.918567	0	74482	0	6603	66420	74482	0(0.0%)	49521(66.487%)	24929(33.47%)	0(0.0%)	0(0.0%)	32(0.043%)	35314466	19310738	1289326(6.538%)	8663224(43.931%)	2734455(13.866%)	2313178(11.73%)	761550(3.862%)	1839044(9.326%)
YCW03	Chr05	30909282	12624038	12725343	1.44	6311731	101305	644	100689	0.748784	0	462	0	155	100843	462	0(0.0%)	462(100.0%)	0(0.0%)	0(0.0%)	0(0.0%)	0(0.0%)	30807977	15919932	1069742(6.407%)	6814290(40.811%)	2024203(12.123%)	2169009(12.99%)	815469(4.884%)	1371982(8.217%)
YCW03	Chr06	32117131	15137568	16315832	1.04	6311731	1178264	7637	1178235	0	0	0	0	30	0	0	0	0	0	0	0	0	30938867	15873289	1066612(6.498%)	5757570(35.077%)	2347249(14.3%)	2381708(14.51%)	849085(5.173%)	1631289(9.938%)
YCW03	Chr07	29600427	11927414	12246638	1.45	6311731	319224	1901	308802	0.95769	0	9982	0	441	309242	9982	0(0.0%)	9982(100.0%)	0(0.0%)	0(0.0%)	0(0.0%)	0(0.0%)	29281203	15250774	1142197(7.314%)	5720659(36.632%)	2329194(14.915%)	2193634(14.047%)	727960(4.661%)	1391287(8.909%)
YCW03	Chr08	28677893	12726423	12739947	1.25	6311731	13524	88	13525	#DIV/0!	0	0	0	0	0	0	0	0	0	0	0	0	28664369	15809319	1038413(6.427%)	6333666(39.198%)	2361060(14.612%)	2068993(12.805%)	757108(4.686%)	1643857(10.173%)
YCW03	Chr09	23344409	2598320	3233844	7.74	6311731	635524	3952	635144	0	0	0	0	381	0	0	0	0	0	0	0	0	22708885	11908326	877259(7.15%)	4210519(34.318%)	2029114(16.538%)	1601243(13.051%)	631033(5.143%)	1260274(10.272%)
YCW03	Chr10	25121489	8508942	8933624	1.9	6311731	424682	2286	367732	0.93756	1003	53395	0	2553	371287	53395	984(1.843%)	46161(86.452%)	6250(11.705%)	0(0.0%)	0(0.0%)	0(0.0%)	24696807	14589474	898612(6.045%)	6263635(42.134%)	2349062(15.802%)	1769368(11.902%)	589158(3.963%)	1269493(8.54%)
YCW03	Chr11	29478255	11735029	13020567	1.4	6311731	1285538	7580	1196482	0.882469	3134	78590	398	6935	1207040	78590	0(0.0%)	60880(74.756%)	17913(21.996%)	2151(2.641%)	172(0.211%)	0(0.0%)	28192717	16282186	1122109(6.761%)	6009935(36.21%)	2811734(16.941%)	2093108(12.611%)	728923(4.392%)	1887519(11.372%)
YCW03	Chr12	27608651	11044113	11534215	1.46	6311731	490102	1345	211636	0.831646	12068	231586	0	34813	258644	231586	0(0.0%)	198308(84.384%)	18998(8.084%)	7650(3.255%)	3647(1.552%)	92(0.039%)	27118549	15611107	1271322(7.98%)	6225724(39.081%)	2538286(15.934%)	1732660(10.876%)	597616(3.751%)	1711842(10.746%)
YZ-2	Chr01	44358732	16978811	17723869	1.57	3478530	745058	3471	545544	0.733053	0	146255	0	53260	598803	146255	0(0.0%)	117211(80.142%)	27618(18.883%)	749(0.512%)	0(0.0%)	0(0.0%)	43613674	19570916	1024626(5.08%)	6944511(34.431%)	3229495(16.012%)	3262279(16.175%)	1215170(6.025%)	1437943(7.129%)
YZ-2	Chr02	37724928	13822395	14313868	1.69	3478530	491473	2837	441149	0.922027	0	46401	0	3924	445072	46401	0(0.0%)	32834(70.761%)	13567(29.239%)	0(0.0%)	0(0.0%)	0(0.0%)	37233455	17557452	1012069(5.608%)	6745572(37.379%)	2683720(14.871%)	2682132(14.862%)	969552(5.372%)	1311835(7.269%)
YZ-2	Chr03	39479560	20915738	21191932	1.14	3478530	276194	1222	187101	0.868285	143	77359	0	11592	198835	77359	0(0.0%)	57103(73.816%)	19928(25.76%)	328(0.424%)	0(0.0%)	0(0.0%)	39203366	17472516	1064310(5.826%)	6812108(37.29%)	2476472(13.556%)	2759173(15.104%)	1049004(5.742%)	1141535(6.249%)
YZ-2	Chr04	37399638	9430717	9542966	2.95	3478530	112249	432	67249	0.922046	0	41493	0	3508	70756	41493	0(0.0%)	40598(97.838%)	866(2.087%)	0(0.0%)	0(0.0%)	31(0.075%)	37287389	21090305	1112010(5.178%)	10418012(48.507%)	2674173(12.451%)	2322308(10.813%)	755556(3.518%)	2037615(9.487%)
YZ-2	Chr05	31128694	12592133	12692513	1.46	3478530	100380	639	99819	0.822064	0	462	0	100	99918	462	0(0.0%)	462(100.0%)	0(0.0%)	0(0.0%)	0(0.0%)	0(0.0%)	31028314	16130724	986545(5.876%)	7244472(43.147%)	2084663(12.416%)	2089532(12.445%)	810503(4.827%)	1255405(7.477%)
YZ-2	Chr06	32069478	15224723	15356558	1.1	3478530	131835	754	109329	0.91998	0	20706	0	1801	111129	20706	0(0.0%)	13414(64.783%)	6283(30.344%)	0(0.0%)	0(0.0%)	0(0.0%)	31937643	16978011	1028651(5.918%)	7005421(40.306%)	2336199(13.441%)	2409820(13.865%)	846451(4.87%)	1506367(8.667%)
YZ-2	Chr07	29828307	12226434	12498921	1.42	3478530	272487	1753	271063	0.594386	0	847	0	578	271640	847	0(0.0%)	0(0.0%)	847(100.0%)	0(0.0%)	0(0.0%)	0(0.0%)	29555820	15603504	1047635(6.545%)	6597610(41.217%)	2186831(13.662%)	2138732(13.361%)	700980(4.379%)	1251312(7.817%)
YZ-2	Chr08	31330840	13429052	13559945	1.32	3478530	130893	391	60044	0.902781	0	63962	0	6888	66931	63962	0(0.0%)	40402(63.166%)	22947(35.876%)	0(0.0%)	0(0.0%)	0(0.0%)	31199947	17680248	1070431(5.725%)	8290688(44.342%)	2262462(12.1%)	2135242(11.42%)	746149(3.991%)	1548159(8.28%)
YZ-2	Chr09	25183798	3066051	3266973	7.15	3478530	200922	681	111551	0.921452	0	82352	0	7020	118570	82352	0(0.0%)	74814(90.847%)	1257(1.526%)	0(0.0%)	0(0.0%)	6217(7.549%)	24982876	14086703	842768(5.773%)	6382819(43.721%)	1874328(12.839%)	1609672(11.026%)	631497(4.326%)	1166530(7.99%)
YZ-2	Chr10	26325136	10181706	10345000	1.57	3478530	163294	321	52491	0.773203	1566	85674	0	23564	77620	85674	4499(5.21%)	50258(58.204%)	16986(19.672%)	9397(10.883%)	0(0.0%)	1437(1.664%)	26161842	15559726	893931(5.547%)	7441997(46.182%)	2097429(13.016%)	1856962(11.524%)	547551(3.398%)	1275820(7.917%)
YZ-2	Chr11	37456592	15424405	15825920	1.4	3478530	401515	1178	183702	0.909496	1470	198101	0	18243	203506	198101	0(0.0%)	155993(78.744%)	38034(19.199%)	820(0.414%)	172(0.087%)	1680(0.848%)	37055077	23362171	1201071(4.894%)	11790026(48.039%)	3288456(13.399%)	2329037(9.49%)	782534(3.188%)	2220769(9.049%)
YZ-2	Chr12	27879653	10993060	11445290	1.49	3478530	452230	867	135883	0.867579	8288	274457	0	33603	177963	274457	0(0.0%)	234820(82.892%)	32421(11.445%)	8645(3.052%)	4010(1.416%)	194(0.068%)	27427423	15510367	1080731(6.592%)	6747671(41.157%)	2430469(14.825%)	1692151(10.321%)	603380(3.68%)	1517872(9.258%)
Zag	Chr01	43748883	16755081	17418771	1.57	6555538	663690	2243	353382	0.491774	852	152602	0	156855	511145	152602	0(0.0%)	127122(83.303%)	15990(10.478%)	4123(2.702%)	0(0.0%)	3278(2.148%)	43085193	19056086	1202144(6.115%)	5794202(29.472%)	3372646(17.155%)	3334831(16.962%)	1222716(6.219%)	1598593(8.131%)
Zag	Chr02	36248026	13461462	14017978	1.65	6555538	556516	3210	499251	0.627004	0	35906	0	21360	520610	35906	0(0.0%)	22061(61.441%)	13357(37.2%)	0(0.0%)	0(0.0%)	0(0.0%)	35691510	16066958	1071547(6.472%)	4896090(29.57%)	2745704(16.583%)	2697198(16.29%)	953726(5.76%)	1491249(9.006%)
Zag	Chr03	37367767	20005052	20420965	1.18	6555538	415913	2499	385833	0.971178	0	29214	0	867	386699	29214	0(0.0%)	29214(100.0%)	0(0.0%)	0(0.0%)	0(0.0%)	0(0.0%)	36951854	15494512	1227213(7.652%)	4988371(31.104%)	2393991(14.927%)	2716675(16.939%)	1035046(6.454%)	1046517(6.525%)
Zag	Chr04	34846077	9135990	9250849	2.8	6555538	114859	296	46451	0.88329	0	60425	0	7984	54434	60425	0(0.0%)	43202(71.497%)	17191(28.45%)	0(0.0%)	0(0.0%)	32(0.053%)	34731218	18777931	1250499(6.523%)	8229279(42.926%)	2737963(14.282%)	2280219(11.894%)	742039(3.871%)	1825756(9.523%)
Zag	Chr05	31147701	12433536	12547578	1.5	6555538	114042	724	113078	0.967876	0	934	0	31	113108	934	0(0.0%)	934(100.0%)	0(0.0%)	0(0.0%)	0(0.0%)	0(0.0%)	31033659	15916246	1069980(6.306%)	6834514(40.283%)	2066051(12.177%)	2130262(12.556%)	800233(4.717%)	1363251(8.035%)
Zag	Chr06	30677124	14910045	15961621	1.01	6555538	1051576	6812	1051454	0	0	0	0	123	0	0	0	0	0	0	0	0	29625548	14748268	1084829(7.084%)	5087477(33.224%)	2219671(14.496%)	2315025(15.118%)	805249(5.259%)	1446453(9.446%)
Zag	Chr07	29723744	12148119	12386289	1.43	6555538	238170	1431	231530	0.857552	0	5695	0	946	232475	5695	0(0.0%)	5695(100.0%)	0(0.0%)	0(0.0%)	0(0.0%)	0(0.0%)	29485574	15452625	1167830(7.383%)	5782338(36.556%)	2374659(15.013%)	2221674(14.046%)	731436(4.624%)	1447211(9.149%)
Zag	Chr08	28204502	12670537	12802156	1.22	6555538	131619	451	68580	0.748747	415	47201	0	15424	84456	47201	134(0.282%)	38211(80.466%)	2764(5.821%)	1169(2.462%)	157(0.331%)	4025(8.476%)	28072883	15202355	1037780(6.673%)	5878470(37.801%)	2312709(14.872%)	2060616(13.251%)	740782(4.764%)	1577861(10.146%)
Zag	Chr09	23487217	2809506	3505064	7.11	6555538	695558	3663	588862	0.800613	5703	85423	0	15571	610184	85423	0(0.0%)	66096(72.559%)	18898(20.746%)	2363(2.594%)	180(0.198%)	1211(1.329%)	22791659	11871756	868196(7.099%)	4073221(33.305%)	2119121(17.327%)	1569349(12.832%)	643107(5.258%)	1294776(10.587%)
Zag	Chr10	23910251	8350140	8927380	1.79	6555538	577240	3218	531051	0.815415	384	37664	0	8142	539620	37664	1259(3.343%)	24366(64.693%)	5009(13.299%)	2321(6.162%)	0(0.0%)	1419(3.768%)	23333011	13322691	913565(6.717%)	5174363(38.043%)	2056938(15.123%)	1792709(13.18%)	579233(4.259%)	1347724(9.909%)
Zag	Chr11	30290323	12257143	13519950	1.37	6555538	1262807	7463	1177451	0.885903	3134	75618	0	6605	1187281	75618	0(0.0%)	57908(73.8%)	17913(22.829%)	2151(2.741%)	172(0.219%)	0(0.0%)	29027516	16490284	1149257(6.838%)	5880532(34.991%)	2930267(17.436%)	2143074(12.752%)	749935(4.462%)	2012828(11.977%)
Zag	Chr12	27232489	11411275	12144823	1.32	6555538	733548	3505	540679	0.78248	16428	150917	0	25525	582881	150917	0(0.0%)	116703(70.587%)	20870(12.623%)	9253(5.597%)	13270(8.026%)	464(0.281%)	26498941	15090173	1296058(8.406%)	5774861(37.456%)	2525246(16.379%)	1729635(11.219%)	592361(3.842%)	1643823(10.662%)
ZS97	Chr01	44754788	17433055	18026719	1.53	2754745	593664	2449	386517	0.699915	0	144986	0	62162	448678	144986	0(0.0%)	108022(74.505%)	35333(24.37%)	749(0.517%)	0(0.0%)	0(0.0%)	44161124	20062494	1051159(5.089%)	7335042(35.514%)	3306767(16.01%)	3254183(15.756%)	1203120(5.825%)	1430950(6.928%)
ZS97	Chr02	37267338	13984529	14124806	1.65	2754745	140277	633	98514	0.925893	0	38669	0	3095	101608	38669	0(0.0%)	25103(64.918%)	13566(35.082%)	0(0.0%)	0(0.0%)	0(0.0%)	37127061	17506727	951868(5.289%)	6725193(37.369%)	2665415(14.811%)	2698426(14.994%)	976310(5.425%)	1333788(7.411%)
ZS97	Chr03	39636162	21238371	21487645	1.17	2754745	249274	1185	177897	0.91304	0	65171	0	6207	184103	65171	0(0.0%)	61086(93.732%)	3323(5.099%)	0(0.0%)	0(0.0%)	0(0.0%)	39386888	17619479	1189811(6.463%)	7001304(38.03%)	2427931(13.188%)	2775954(15.078%)	1043107(5.666%)	1077271(5.852%)
ZS97	Chr04	37248126	10091509	10244962	2.68	2754745	153453	428	66927	0.945474	0	81809	0	4718	71644	81809	0(0.0%)	65925(80.582%)	15725(19.221%)	0(0.0%)	0(0.0%)	161(0.197%)	37094673	20870716	1137272(5.345%)	9794582(46.033%)	2726839(12.816%)	2370105(11.139%)	755915(3.553%)	2303581(10.826%)
ZS97	Chr05	30786153	12393291	12479162	1.48	2754745	85871	545	85343	0.882798	0	467	0	62	85404	467	0(0.0%)	467(100.0%)	0(0.0%)	0(0.0%)	0(0.0%)	0(0.0%)	30700282	16003142	992782(6.004%)	7203114(43.562%)	2074800(12.548%)	2088289(12.629%)	813890(4.922%)	1203854(7.281%)
ZS97	Chr06	32119910	15300133	15421383	1.09	2754745	121250	681	95736	0.811523	0	20706	0	4809	100544	20706	0(0.0%)	13414(64.783%)	6283(30.344%)	0(0.0%)	0(0.0%)	0(0.0%)	31998660	17147593	1043031(5.947%)	7268160(41.442%)	2364178(13.48%)	2369766(13.512%)	811646(4.628%)	1482053(8.45%)
ZS97	Chr07	30840550	12965133	13468746	1.34	2754745	503613	3159	488458	0.923595	0	13998	0	1158	489615	13998	0(0.0%)	13090(93.513%)	908(6.487%)	0(0.0%)	0(0.0%)	0(0.0%)	30336937	16387383	1128353(6.728%)	7200807(42.934%)	2222944(13.254%)	2127155(12.683%)	697347(4.158%)	1304874(7.78%)
ZS97	Chr08	30264782	13199103	13338652	1.28	2754745	139549	420	64454	0.909849	0	68326	0	6770	71223	68326	0(0.0%)	44765(65.517%)	22948(33.586%)	0(0.0%)	0(0.0%)	0(0.0%)	30125233	17259290	1046309(5.926%)	8034392(45.504%)	2159801(12.232%)	2105915(11.927%)	758862(4.298%)	1555078(8.807%)
ZS97	Chr09	22989350	2878751	2998583	6.94	2754745	119832	116	18264	0.797537	5702	81005	0	14862	38876	81005	0(0.0%)	61938(71.424%)	18881(21.773%)	2363(2.725%)	180(0.208%)	1012(1.167%)	22869518	12308144	802315(6.35%)	4872017(38.558%)	1876573(14.851%)	1548950(12.259%)	616554(4.879%)	1198712(9.487%)
ZS97	Chr10	25797731	9937748	10101225	1.58	2754745	163477	320	52454	0.764294	1982	84855	0	24187	78622	84855	3680(4.303%)	50258(58.761%)	16986(19.86%)	9397(10.987%)	0(0.0%)	1437(1.68%)	25634254	15423968	886916(5.652%)	7382727(47.048%)	2044421(13.029%)	1864865(11.884%)	544924(3.473%)	1251470(7.975%)
ZS97	Chr11	32624309	13449930	13674950	1.41	2754745	225020	627	98012	0.950759	0	120755	0	6254	104265	120755	0(0.0%)	95694(79.246%)	24478(20.271%)	75(0.062%)	0(0.0%)	0(0.0%)	32399289	19792474	1117935(5.507%)	9090592(44.777%)	2884419(14.208%)	2298783(11.323%)	747992(3.684%)	2025692(9.978%)
ZS97	Chr12	27232431	11301187	11560652	1.39	2754745	259465	806	127128	0.925592	0	122491	0	9847	136974	122491	0(0.0%)	111664(91.023%)	10542(8.593%)	0(0.0%)	0(0.0%)	0(0.0%)	26972966	15629166	1025105(6.409%)	6905438(43.174%)	2310520(14.446%)	1682636(10.52%)	592951(3.707%)	1679996(10.504%)

## Sheet: S3
Supplementary Table 3 Gaps in the rice centromere assemblies
Chr	CEN start (bp)	CEN end (bp)	Gap start (bp)	Gap end (bp)	Gap Source
Chr01_18WR-118	16785958	16990362	16839250	16839379	GCI issue
Chr01_18WR-118	16785958	16990362	16839265	16839364	Assembly gap
Chr01_18WR-118	16785958	16990362	16839265	16839364	GCI issue
Chr01_18WR-118	16785958	16990362	16944412	16944541	GCI issue
Chr01_18WR-118	16785958	16990362	16944427	16944526	Assembly gap
Chr01_18WR-118	16785958	16990362	16944427	16944526	GCI issue
Chr01_18XHB-49	16968473	17091795	16992283	16992412	GCI issue
Chr01_18XHB-49	16968473	17091795	16992298	16992397	Assembly gap
Chr01_18XHB-49	16968473	17091795	16992298	16992397	GCI issue
Chr01_18XHB-49	16968473	17091795	17051188	17051317	GCI issue
Chr01_18XHB-49	16968473	17091795	17051203	17051302	Assembly gap
Chr01_18XHB-49	16968473	17091795	17051203	17051302	GCI issue
Chr01_CW03	17545660	18492920	17915161	17915290	GCI issue
Chr01_CW03	17545660	18492920	17915176	17915275	Assembly gap
Chr01_CW03	17545660	18492920	17915176	17915275	GCI issue
Chr01_SL133	17505499	18256813	18043217	18067484	GCI issue
Chr01_SL133	17505499	18256813	18215641	18237757	GCI issue
Chr01_SL187	17179662	18096373	17561530	17605870	GCI issue
Chr01_SL187	17179662	18096373	17655985	17667552	GCI issue
Chr02_18WR-118	13681001	13965878	13726118	13726247	GCI issue
Chr02_18WR-118	13681001	13965878	13726133	13726232	Assembly gap
Chr02_18WR-118	13681001	13965878	13726133	13726232	GCI issue
Chr02_18WR-118	13681001	13965878	13768452	13768581	GCI issue
Chr02_18WR-118	13681001	13965878	13768467	13768566	Assembly gap
Chr02_18WR-118	13681001	13965878	13768467	13768566	GCI issue
Chr02_18WR-118	13681001	13965878	13801622	13801751	GCI issue
Chr02_18WR-118	13681001	13965878	13801637	13801736	Assembly gap
Chr02_18WR-118	13681001	13965878	13801637	13801736	GCI issue
Chr02_18WR-118	13681001	13965878	13831630	13831759	GCI issue
Chr02_18WR-118	13681001	13965878	13831645	13831744	Assembly gap
Chr02_18WR-118	13681001	13965878	13831645	13831744	GCI issue
Chr02_18WR-118	13681001	13965878	13859364	13859493	GCI issue
Chr02_18WR-118	13681001	13965878	13859379	13859478	Assembly gap
Chr02_18WR-118	13681001	13965878	13859379	13859478	GCI issue
Chr02_18WR-118	13681001	13965878	13890328	13890428	GCI issue
Chr02_18WR-118	13681001	13965878	13890329	13890428	Assembly gap
Chr02_18WR-118	13681001	13965878	13890329	13890428	GCI issue
Chr02_18WR-118	13681001	13965878	13919538	13919667	GCI issue
Chr02_18WR-118	13681001	13965878	13919553	13919652	Assembly gap
Chr02_18WR-118	13681001	13965878	13919553	13919652	GCI issue
Chr02_18XHB-49	14152970	14215513	14200014	14200114	GCI issue
Chr02_18XHB-49	14152970	14215513	14200015	14200114	Assembly gap
Chr02_18XHB-49	14152970	14215513	14200015	14200114	GCI issue
Chr03_18WR-118	19928466	20211145	19941150	19941279	GCI issue
Chr03_18WR-118	19928466	20211145	19941165	19941264	Assembly gap
Chr03_18WR-118	19928466	20211145	19941165	19941264	GCI issue
Chr03_18WR-118	19928466	20211145	19968856	19968956	GCI issue
Chr03_18WR-118	19928466	20211145	19968857	19968956	Assembly gap
Chr03_18WR-118	19928466	20211145	19968857	19968956	GCI issue
Chr03_18WR-118	19928466	20211145	19992391	19992520	GCI issue
Chr03_18WR-118	19928466	20211145	19992406	19992505	Assembly gap
Chr03_18WR-118	19928466	20211145	19992406	19992505	GCI issue
Chr03_18WR-118	19928466	20211145	20086748	20086877	GCI issue
Chr03_18WR-118	19928466	20211145	20086763	20086862	Assembly gap
Chr03_18WR-118	19928466	20211145	20086763	20086862	GCI issue
Chr03_18WR-118	19928466	20211145	20127250	20127379	GCI issue
Chr03_18WR-118	19928466	20211145	20127265	20127364	Assembly gap
Chr03_18WR-118	19928466	20211145	20127265	20127364	GCI issue
Chr03_18XHB-49	20841072	21188646	21022342	21022442	GCI issue
Chr03_18XHB-49	20841072	21188646	21022343	21022442	Assembly gap
Chr03_18XHB-49	20841072	21188646	21022343	21022442	GCI issue
Chr03_18XHB-49	20841072	21188646	21168532	21168661	GCI issue
Chr03_18XHB-49	20841072	21188646	21168547	21168646	Assembly gap
Chr03_18XHB-49	20841072	21188646	21168547	21168646	GCI issue
Chr04_CW18	10651277	10855464	10745739	10754375	GCI issue
Chr05_18WR-118	12493127	12539191	12499256	12499356	GCI issue
Chr05_18WR-118	12493127	12539191	12499257	12499356	Assembly gap
Chr05_18WR-118	12493127	12539191	12499257	12499356	GCI issue
Chr05_18WR-118	12493127	12539191	12523859	12523988	GCI issue
Chr05_18WR-118	12493127	12539191	12523874	12523973	Assembly gap
Chr05_18WR-118	12493127	12539191	12523874	12523973	GCI issue
Chr05_18XHB-49	12935912	13006982	12973071	12973171	GCI issue
Chr05_18XHB-49	12935912	13006982	12973072	12973171	Assembly gap
Chr05_18XHB-49	12935912	13006982	12973072	12973171	GCI issue
Chr05_NH281	10592505	11144943	10664093	10664222	GCI issue
Chr05_NH281	10592505	11144943	10664108	10664207	Assembly gap
Chr05_NH281	10592505	11144943	10664108	10664207	GCI issue
Chr05_NH281	10592505	11144943	10811459	10822448	GCI issue
Chr05_NH281	10592505	11144943	10811474	10811573	Assembly gap
Chr05_NH281	10592505	11144943	10811474	10811573	GCI issue
Chr06_13-65	15186049	16178570	15639139	15639239	GCI issue
Chr06_13-65	15186049	16178570	15639140	15639239	Assembly gap
Chr06_13-65	15186049	16178570	15639140	15639239	GCI issue
Chr06_18WR-118	15383627	15581352	15397064	15397193	GCI issue
Chr06_18WR-118	15383627	15581352	15397079	15397178	Assembly gap
Chr06_18WR-118	15383627	15581352	15397079	15397178	GCI issue
Chr06_18WR-118	15383627	15581352	15435186	15435286	GCI issue
Chr06_18WR-118	15383627	15581352	15435187	15435286	Assembly gap
Chr06_18WR-118	15383627	15581352	15435187	15435286	GCI issue
Chr06_18WR-118	15383627	15581352	15501248	15501348	GCI issue
Chr06_18WR-118	15383627	15581352	15501249	15501348	Assembly gap
Chr06_18WR-118	15383627	15581352	15501249	15501348	GCI issue
Chr06_18WR-118	15383627	15581352	15533339	15533439	GCI issue
Chr06_18WR-118	15383627	15581352	15533340	15533439	Assembly gap
Chr06_18WR-118	15383627	15581352	15533340	15533439	GCI issue
Chr06_18WR-118	15383627	15581352	15570589	15570718	GCI issue
Chr06_18WR-118	15383627	15581352	15570604	15570703	Assembly gap
Chr06_18WR-118	15383627	15581352	15570604	15570703	GCI issue
Chr06_18XHB-49	15191400	15326314	15242151	15242280	GCI issue
Chr06_18XHB-49	15191400	15326314	15242166	15242265	Assembly gap
Chr06_18XHB-49	15191400	15326314	15242166	15242265	GCI issue
Chr06_18XHB-49	15191400	15326314	15267500	15267629	GCI issue
Chr06_18XHB-49	15191400	15326314	15267515	15267614	Assembly gap
Chr06_18XHB-49	15191400	15326314	15267515	15267614	GCI issue
Chr07_13-65	12019385	12213551	12098752	12098881	GCI issue
Chr07_13-65	12019385	12213551	12098767	12098866	Assembly gap
Chr07_13-65	12019385	12213551	12098767	12098866	GCI issue
Chr07_18WR-118	13156001	13180464	13165191	13165320	GCI issue
Chr07_18WR-118	13156001	13180464	13165206	13165305	Assembly gap
Chr07_18WR-118	13156001	13180464	13165206	13165305	GCI issue
Chr07_CW13	13153663	13398264	13338089	13338218	GCI issue
Chr07_CW13	13153663	13398264	13338104	13338203	Assembly gap
Chr07_CW13	13153663	13398264	13338104	13338203	GCI issue
Chr08_18WR-118	12911049	12996582	12914553	12914682	GCI issue
Chr08_18WR-118	12911049	12996582	12914568	12914667	Assembly gap
Chr08_18WR-118	12911049	12996582	12914568	12914667	GCI issue
Chr09_18WR-118	2794117	2933331	2886062	2886162	GCI issue
Chr09_18WR-118	2794117	2933331	2886063	2886162	Assembly gap
Chr09_18WR-118	2794117	2933331	2886063	2886162	GCI issue
Chr09_18WR-118	2794117	2933331	2925649	2925778	GCI issue
Chr09_18WR-118	2794117	2933331	2925664	2925763	Assembly gap
Chr09_18WR-118	2794117	2933331	2925664	2925763	GCI issue
Chr09_18XHB-49	2798087	3004907	2890815	2890944	GCI issue
Chr09_18XHB-49	2798087	3004907	2890830	2890929	Assembly gap
Chr09_18XHB-49	2798087	3004907	2890830	2890929	GCI issue
Chr09_CW14	3076338	3323850	3213031	3274760	GCI issue
Chr10_18WR-118	8300973	8515407	8382894	8383023	GCI issue
Chr10_18WR-118	8300973	8515407	8382909	8383008	Assembly gap
Chr10_18WR-118	8300973	8515407	8382909	8383008	GCI issue
Chr10_18XHB-49	9092727	9393260	9211811	9211940	GCI issue
Chr10_18XHB-49	9092727	9393260	9211826	9211925	Assembly gap
Chr10_18XHB-49	9092727	9393260	9211826	9211925	GCI issue
Chr10_18XHB-49	9092727	9393260	9265609	9265738	GCI issue
Chr10_18XHB-49	9092727	9393260	9265624	9265723	Assembly gap
Chr10_18XHB-49	9092727	9393260	9265624	9265723	GCI issue
Chr10_CW07	8713114	9080000	9027039	9027139	GCI issue
Chr10_CW07	8713114	9080000	9027040	9027139	Assembly gap
Chr10_CW07	8713114	9080000	9027040	9027139	GCI issue
Chr10_CW15	561725	861317	861303	861432	GCI issue
Chr10_CW22	9150257	9696901	9201552	9201681	GCI issue
Chr10_CW22	9150257	9696901	9201567	9201666	Assembly gap
Chr10_CW22	9150257	9696901	9201567	9201666	GCI issue
Chr10_CW22	9150257	9696901	9243688	9243817	GCI issue
Chr10_CW22	9150257	9696901	9243703	9243802	Assembly gap
Chr10_CW22	9150257	9696901	9243703	9243802	GCI issue
Chr11_13-65	12478596	13271555	12918369	12918498	GCI issue
Chr11_13-65	12478596	13271555	12918384	12918483	Assembly gap
Chr11_13-65	12478596	13271555	12918384	12918483	GCI issue
Chr11_13-65	12478596	13271555	12994423	12994552	GCI issue
Chr11_13-65	12478596	13271555	12994438	12994537	Assembly gap
Chr11_13-65	12478596	13271555	12994438	12994537	GCI issue
Chr11_13-65	12478596	13271555	13070953	13071082	GCI issue
Chr11_13-65	12478596	13271555	13070968	13071067	Assembly gap
Chr11_13-65	12478596	13271555	13070968	13071067	GCI issue
Chr11_13-65	12478596	13271555	13211645	13211774	GCI issue
Chr11_13-65	12478596	13271555	13211660	13211759	Assembly gap
Chr11_13-65	12478596	13271555	13211660	13211759	GCI issue
Chr11_18WR-118	12735749	12856949	12815713	12815842	GCI issue
Chr11_18WR-118	12735749	12856949	12815728	12815827	Assembly gap
Chr11_18WR-118	12735749	12856949	12815728	12815827	GCI issue
Chr11_18XHB-49	12545726	13138778	12709519	12709619	GCI issue
Chr11_18XHB-49	12545726	13138778	12709520	12709619	Assembly gap
Chr11_18XHB-49	12545726	13138778	12709520	12709619	GCI issue
Chr11_18XHB-49	12545726	13138778	12739709	12739838	GCI issue
Chr11_18XHB-49	12545726	13138778	12739724	12739823	Assembly gap
Chr11_18XHB-49	12545726	13138778	12739724	12739823	GCI issue
Chr11_18XHB-49	12545726	13138778	13002315	13002444	GCI issue
Chr11_18XHB-49	12545726	13138778	13002330	13002429	Assembly gap
Chr11_18XHB-49	12545726	13138778	13002330	13002429	GCI issue
Chr11_18XHB-49	12545726	13138778	13121184	13121284	GCI issue
Chr11_18XHB-49	12545726	13138778	13121185	13121284	Assembly gap
Chr11_18XHB-49	12545726	13138778	13121185	13121284	GCI issue
Chr11_CW06	13460463	13722944	13460346	13460475	GCI issue
Chr11_CW13	13372052	13823866	13617750	13617779	GCI issue
Chr11_SL001	12389319	13125780	12617231	12617408	GCI issue
Chr11_SL032	12873004	14298539	13245716	13247571	GCI issue
Chr11_SL032	12873004	14298539	13245731	13245830	Assembly gap
Chr11_SL032	12873004	14298539	13245731	13245830	GCI issue
Chr11_YCW03	11735029	13020567	11929144	11929273	GCI issue
Chr11_YCW03	11735029	13020567	11929159	11929258	Assembly gap
Chr11_YCW03	11735029	13020567	11929159	11929258	GCI issue
Chr11_YCW03	11735029	13020567	12411505	12411605	GCI issue
Chr11_YCW03	11735029	13020567	12411506	12411605	Assembly gap
Chr11_YCW03	11735029	13020567	12411506	12411605	GCI issue
Chr11_YCW03	11735029	13020567	12614203	12614332	GCI issue
Chr11_YCW03	11735029	13020567	12614218	12614317	Assembly gap
Chr11_YCW03	11735029	13020567	12614218	12614317	GCI issue
Chr11_YCW03	11735029	13020567	12906538	12906667	GCI issue
Chr11_YCW03	11735029	13020567	12906553	12906652	Assembly gap
Chr11_YCW03	11735029	13020567	12906553	12906652	GCI issue
Chr12_18WR-118	11214857	11644484	11461401	11461530	GCI issue
Chr12_18WR-118	11214857	11644484	11461416	11461515	Assembly gap
Chr12_18WR-118	11214857	11644484	11461416	11461515	GCI issue
Chr12_18WR-118	11214857	11644484	11541144	11541244	GCI issue
Chr12_18WR-118	11214857	11644484	11541145	11541244	Assembly gap
Chr12_18WR-118	11214857	11644484	11541145	11541244	GCI issue
Chr12_18WR-118	11214857	11644484	11596603	11596732	GCI issue
Chr12_18WR-118	11214857	11644484	11596618	11596717	Assembly gap
Chr12_18WR-118	11214857	11644484	11596618	11596717	GCI issue
Chr12_18WR-118	11214857	11644484	11621930	11622059	GCI issue
Chr12_18WR-118	11214857	11644484	11621945	11622044	Assembly gap
Chr12_18WR-118	11214857	11644484	11621945	11622044	GCI issue
Chr12_18XHB-49	10992477	11355967	11067851	11067951	GCI issue
Chr12_18XHB-49	10992477	11355967	11067852	11067951	Assembly gap
Chr12_18XHB-49	10992477	11355967	11067852	11067951	GCI issue
Chr12_18XHB-49	10992477	11355967	11347954	11348083	GCI issue
Chr12_18XHB-49	10992477	11355967	11347969	11348068	Assembly gap
Chr12_18XHB-49	10992477	11355967	11347969	11348068	GCI issue
Chr12_CW18	13779477	15151611	14897117	14897246	GCI issue
Chr12_CW18	13779477	15151611	14897132	14897231	Assembly gap
Chr12_CW18	13779477	15151611	14897132	14897231	Assembly gap
Chr12_CW18	13779477	15151611	14897132	14897231	GCI issue
Chr12_CW18	13779477	15151611	14897132	14897231	GCI issue

## Sheet: S4
Supplementary Table 4 | Putative centromere introgression events in rice evolution
Chromosome	Accession	Whole-genome Group	Chromosome arm group	Centromere group
Chr01	SL010 (Rajahamsal)	XI-2	XI	GJ
Chr01	SL203 (N22)	AUS	AUS	GJ
Chr01	SL121 (Qingke)	AUS	AUS	GJ
Chr03	Cempo Abang	XI-1B	XI	GJ-tmp
Chr04	J4155S (Jing4155S)	XI-1A	XI	GJ
Chr06	PI653439	AUS	AUS	GJ
Chr06	SL121 (Qingke)	AUS	AUS	XI
Chr09	ZS97 (Zhenshan97)	XI-1A	XI	GJ-tmp
Chr09	LK638S (Longke638S)	XI-1A	XI	GJ-tmp
Chr10	18XHB-83	XI-2	XI	AUS
Chr10	SL019 (Djanda Mandja)	GJ-trp	GJ-trp	XI-3
Chr10	SL001 (Heibiao)	GJ-trp	GJ-trp	XI-3
Chr10	Pulut-Hitam-2	GJ-trp	GJ-trp	XI-3
Chr11	CW11	Oruf	Oruf	XI
Chr12	MH63 (Minghui63)	XI-1B	XI	GJ-trp
Chr12	SL190 (Kasalath)	AUS	AUS	GJ-trp
Chr12	SL203 (N22)	AUS	AUS	GJ-trp

## Sheet: S5
Supplementary Table 5 | Frequency of non-canonical satellites (sati) in rice centromeres
Accession	Taxonomy	ChrID	sati78	sati87	sati94		sati99	sati104	sati207
			78bp	87bp	93bp	94bp	99bp	104bp	207bp
9311	XI	Chr10	24
Cempo-Ireng	XI	Chr10	21
CW01	Oruf	Chr11						30	48
CW07	Oruf	Chr11						16	63
CW13	Oruf	Chr11						22
CW18	Oruf	Chr11						16	36
CX20	XI	Chr01	1	21
HuaZhan	XI	Chr01	2	21
LK638S	XI	Chr01	1	22
NH265	Ogla	Chr03					47
NH265	Ogla	Chr10			30	19
NH267	Ogla	Chr03					44
NH271	Ogla	Chr03					44
NH271	Ogla	Chr10			33	21
NH273	Ogla	Chr03					38
NH284	Obar	Chr10			82	62
NH284	Obar	Chr11						21
NH285	Obar	Chr03					35
NH285	Obar	Chr10	2		69	56
NH286	Obar	Chr10			55	55
SL084	XI	Chr01	3	25
SL173	XI	Chr01	1	30			1

## Sheet: S6
Supplementary Table 6 | Satellite annotation in moHRs
Chromosome	ChrID	Accession	Taxonomy	Start (bp)	End (bp)	Strand	Superfamily	Copy number	moHR Length (bp)
Chr01_13-65	Chr01	13-65	GJ	16835334	16849355	+	H	6	14022
Chr01_13-65	Chr01	13-65	GJ	16941783	16944264	+	H	16	2482
Chr01_13-65	Chr01	13-65	GJ	16945533	16948014	+	H	16	2482
Chr01_13-65	Chr01	13-65	GJ	16948497	16949738	+	H	8	1242
Chr01_13-65	Chr01	13-65	GJ	16949902	16951763	+	H	12	1862
Chr01_13-65	Chr01	13-65	GJ	16952245	16953486	+	H	8	1242
Chr01_13-65	Chr01	13-65	GJ	16979451	16980536	+	H	7	1086
Chr01_13-65	Chr01	13-65	GJ	16981967	16982743	+	H	5	777
Chr01_13-65	Chr01	13-65	GJ	16983702	16985408	+	H	11	1707
Chr01_13-65	Chr01	13-65	GJ	16987152	16988858	+	H	11	1707
Chr01_13-65	Chr01	13-65	GJ	16994072	16995158	+	H	7	1087
Chr01_13-65	Chr01	13-65	GJ	16996591	16997675	+	H	7	1085
Chr01_13-65	Chr01	13-65	GJ	16999741	17000670	+	H	6	930
Chr01_13-65	Chr01	13-65	GJ	17001156	17002242	+	H	7	1087
Chr01_13-65	Chr01	13-65	GJ	17003675	17004759	+	H	7	1085
Chr01_13-65	Chr01	13-65	GJ	17006825	17007599	+	H	5	775
Chr01_13-65	Chr01	13-65	GJ	17009190	17009966	+	H	5	777
Chr01_13-65	Chr01	13-65	GJ	17010925	17011701	+	H	5	777
Chr01_13-65	Chr01	13-65	GJ	17012980	17013756	+	H	5	777
Chr01_13-65	Chr01	13-65	GJ	17015355	17016906	+	H	10	1552
Chr01_13-65	Chr01	13-65	GJ	17018030	17019269	+	H	8	1240
Chr01_13-65	Chr01	13-65	GJ	17021335	17022574	+	H	8	1240
Chr01_13-65	Chr01	13-65	GJ	17022740	17024134	+	H	9	1395
Chr01_13-65	Chr01	13-65	GJ	17027774	17028548	+	H	5	775
Chr01_13-65	Chr01	13-65	GJ	17029981	17031065	+	H	7	1085
Chr01_13-65	Chr01	13-65	GJ	17031228	17032002	+	H	5	775
Chr01_13-65	Chr01	13-65	GJ	17034867	17035796	+	H	6	930
Chr01_13-65	Chr01	13-65	GJ	17037856	17038785	+	H	6	930
Chr01_13-65	Chr01	13-65	GJ	17040845	17041774	+	H	6	930
Chr01_13-65	Chr01	13-65	GJ	17043834	17044763	+	H	6	930
Chr01_13-65	Chr01	13-65	GJ	17045708	17046637	+	H	6	930
Chr01_13-65	Chr01	13-65	GJ	17047275	17048204	+	H	6	930
Chr01_13-65	Chr01	13-65	GJ	17049482	17050256	+	H	5	775
Chr01_13-65	Chr01	13-65	GJ	17051214	17052143	+	H	6	930
Chr01_13-65	Chr01	13-65	GJ	17053421	17055125	+	H	11	1705
Chr01_13-65	Chr01	13-65	GJ	17056251	17057180	+	H	6	930
Chr01_13-65	Chr01	13-65	GJ	17058306	17060010	+	H	11	1705
Chr01_13-65	Chr01	13-65	GJ	17061136	17062530	+	H	9	1395
Chr01_13-65	Chr01	13-65	GJ	17063656	17064896	+	H	8	1241
Chr01_13-65	Chr01	13-65	GJ	17066487	17067416	+	H	6	930
Chr01_13-65	Chr01	13-65	GJ	17067582	17068666	+	H	7	1085
Chr01_13-65	Chr01	13-65	GJ	17068832	17069763	+	H	6	932
Chr01_13-65	Chr01	13-65	GJ	17069927	17071787	+	H	12	1861
Chr01_13-65	Chr01	13-65	GJ	17073378	17074307	+	H	6	930
Chr01_13-65	Chr01	13-65	GJ	17074473	17075557	+	H	7	1085
Chr01_13-65	Chr01	13-65	GJ	17075723	17076654	+	H	6	932
Chr01_13-65	Chr01	13-65	GJ	17076818	17078367	+	H	10	1550
Chr01_13-65	Chr01	13-65	GJ	17078533	17079619	+	H	7	1087
Chr01_13-65	Chr01	13-65	GJ	17079783	17080867	+	H	7	1085
Chr01_13-65	Chr01	13-65	GJ	17081033	17082117	+	H	7	1085
Chr01_13-65	Chr01	13-65	GJ	17082283	17083214	+	H	6	932
Chr01_13-65	Chr01	13-65	GJ	17083378	17084307	+	H	6	930
Chr01_13-65	Chr01	13-65	GJ	17084473	17085404	+	H	6	932
Chr01_13-65	Chr01	13-65	GJ	17086198	17087127	+	H	6	930
Chr01_13-65	Chr01	13-65	GJ	17087293	17088069	+	H	5	777
Chr01_13-65	Chr01	13-65	GJ	17089348	17090124	+	H	5	777
Chr01_13-65	Chr01	13-65	GJ	17102095	17102868	+	H	5	774
Chr01_13-65	Chr01	13-65	GJ	17107454	17108228	+	H	5	775
Chr01_13-65	Chr01	13-65	GJ	17116284	17117058	+	H	5	775
Chr01_13-65	Chr01	13-65	GJ	17118804	17120661	+	H	12	1858
Chr01_13-65	Chr01	13-65	GJ	17122028	17122956	+	H	6	929
Chr01_13-65	Chr01	13-65	GJ	17124536	17125465	+	H	6	930
Chr01_13-65	Chr01	13-65	GJ	17128613	17129542	+	H	6	930
Chr01_13-65	Chr01	13-65	GJ	17131597	17132526	+	H	6	930
Chr01_13-65	Chr01	13-65	GJ	17132692	17133466	+	H	5	775
Chr01_13-65	Chr01	13-65	GJ	17135046	17135975	+	H	6	930
Chr01_13-65	Chr01	13-65	GJ	17136141	17136915	+	H	5	775
Chr01_13-65	Chr01	13-65	GJ	17142439	17143368	+	H	6	930
Chr01_13-65	Chr01	13-65	GJ	17144948	17146187	+	H	8	1240
Chr01_13-65	Chr01	13-65	GJ	17146353	17147902	+	H	10	1550
Chr01_13-65	Chr01	13-65	GJ	17149328	17150567	+	H	8	1240
Chr01_13-65	Chr01	13-65	GJ	17150733	17152282	+	H	10	1550
Chr01_13-65	Chr01	13-65	GJ	17154967	17155741	+	H	5	775
Chr01_13-65	Chr01	13-65	GJ	17156691	17157620	+	H	6	930
Chr01_13-65	Chr01	13-65	GJ	17157786	17158560	+	H	5	775
Chr01_13-65	Chr01	13-65	GJ	17159355	17160594	+	H	8	1240
Chr01_13-65	Chr01	13-65	GJ	17160760	17162309	+	H	10	1550
Chr01_13-65	Chr01	13-65	GJ	17165945	17166719	+	H	5	775
Chr01_13-65	Chr01	13-65	GJ	17166885	17168125	+	H	8	1241
Chr01_13-65	Chr01	13-65	GJ	17171150	17171923	+	H	5	774
Chr01_13-65	Chr01	13-65	GJ	17173834	17174608	+	H	5	775
Chr01_13-65	Chr01	13-65	GJ	17174774	17176014	+	H	8	1241
Chr01_13-65	Chr01	13-65	GJ	17179039	17179812	+	H	5	774
Chr01_13-65	Chr01	13-65	GJ	17180938	17181711	+	H	5	774
Chr01_13-65	Chr01	13-65	GJ	17274692	17275977	-	D	7	1286
Chr01_13-65	Chr01	13-65	GJ	17276971	17278256	-	D	7	1286
Chr01_13-65	Chr01	13-65	GJ	17278422	17280329	-	D	10	1908
Chr01_13-65	Chr01	13-65	GJ	17280485	17291595	-	D	69	11111
Chr01_13-65	Chr01	13-65	GJ	17291751	17422976	-	D	97	131226
Chr01_13-65	Chr01	13-65	GJ	17427893	17428880	-	D	6	988
Chr01_13-65	Chr01	13-65	GJ	17473003	17473778	-	H	5	776
Chr01_13-65	Chr01	13-65	GJ	17478061	17478836	-	H	5	776
Chr01_13-65	Chr01	13-65	GJ	17483746	17485660	+	D	5	1915
Chr01_13-65	Chr01	13-65	GJ	17486753	17493893	+	D	43	7141
Chr01_13-65	Chr01	13-65	GJ	17494519	17497013	+	D	15	2495
Chr01_13-65	Chr01	13-65	GJ	17497639	17500299	+	D	16	2661
Chr01_13-65	Chr01	13-65	GJ	17500925	17502586	+	D	10	1662
Chr01_13-65	Chr01	13-65	GJ	17502752	17509220	+	D	39	6469
Chr01_13-65	Chr01	13-65	GJ	17541377	17542143	-	H	5	767
Chr01_13-65	Chr01	13-65	GJ	17542784	17543550	-	H	5	767
Chr01_18WR-118	Chr01	18WR-118	GJ	16840042	16840815	+	H	5	774
Chr01_18WR-118	Chr01	18WR-118	GJ	16840042	16840815	+	H	5	774
Chr01_18WR-118	Chr01	18WR-118	GJ	16925903	16927687	-	D	10	1785
Chr01_18WR-118	Chr01	18WR-118	GJ	16925903	16927687	-	D	10	1785
Chr01_18WR-118	Chr01	18WR-118	GJ	16927843	16932992	-	D	32	5150
Chr01_18WR-118	Chr01	18WR-118	GJ	16927843	16932992	-	D	32	5150
Chr01_18WR-118	Chr01	18WR-118	GJ	16933148	16944363	-	D	50	11216
Chr01_18WR-118	Chr01	18WR-118	GJ	16933148	16944363	-	D	50	11216
Chr01_18WR-118	Chr01	18WR-118	GJ	16944528	16945657	+	D	7	1130
Chr01_18WR-118	Chr01	18WR-118	GJ	16944528	16945657	+	D	7	1130
Chr01_18WR-118	Chr01	18WR-118	GJ	16946283	16947949	+	D	10	1667
Chr01_18WR-118	Chr01	18WR-118	GJ	16946283	16947949	+	D	10	1667
Chr01_18WR-118	Chr01	18WR-118	GJ	16948115	16948943	+	D	5	829
Chr01_18WR-118	Chr01	18WR-118	GJ	16948115	16948943	+	D	5	829
Chr01_18WR-118	Chr01	18WR-118	GJ	16949109	16957236	+	D	49	8128
Chr01_18WR-118	Chr01	18WR-118	GJ	16949109	16957236	+	D	49	8128
Chr01_18XHB-49	Chr01	18XHB-49	AUS	16971233	16972057	-	D	5	825
Chr01_18XHB-49	Chr01	18XHB-49	AUS	16987803	16988793	-	D	6	991
Chr01_18XHB-49	Chr01	18XHB-49	AUS	16992529	16995003	-	E	15	2475
Chr01_18XHB-49	Chr01	18XHB-49	AUS	16995156	17000765	-	E	34	5610
Chr01_18XHB-49	Chr01	18XHB-49	AUS	17000918	17003557	-	E	16	2640
Chr01_18XHB-49	Chr01	18XHB-49	AUS	17003710	17006349	-	E	16	2640
Chr01_18XHB-49	Chr01	18XHB-49	AUS	17006502	17008811	-	E	14	2310
Chr01_18XHB-49	Chr01	18XHB-49	AUS	17008964	17011273	-	E	14	2310
Chr01_18XHB-49	Chr01	18XHB-49	AUS	17011426	17017695	-	E	38	6270
Chr01_18XHB-49	Chr01	18XHB-49	AUS	17017837	17021252	-	E	21	3416
Chr01_18XHB-49	Chr01	18XHB-49	AUS	17021407	17022222	-	E	5	816
Chr01_18XHB-49	Chr01	18XHB-49	AUS	17022377	17023510	-	E	7	1134
Chr01_18XHB-49	Chr01	18XHB-49	AUS	17024149	17026098	-	E	12	1950
Chr01_18XHB-49	Chr01	18XHB-49	AUS	17048098	17049086	+	D	6	989
Chr01_18XHB-49	Chr01	18XHB-49	AUS	17049587	17050419	+	D	5	833
Chr01_18XHB-49	Chr01	18XHB-49	AUS	17060632	17061536	+	H	6	905
Chr01_18XHB-49	Chr01	18XHB-49	AUS	17065235	17066139	+	H	6	905
Chr01_18XHB-49	Chr01	18XHB-49	AUS	17067940	17068714	+	H	5	775
Chr01_18XHB-49	Chr01	18XHB-49	AUS	17075560	17076489	+	H	6	930
Chr01_18XHB-49	Chr01	18XHB-49	AUS	17076809	17077583	+	H	5	775
Chr01_18XHB-57	Chr01	18XHB-57	XI	17219115	17220433	-	E	8	1319
Chr01_18XHB-57	Chr01	18XHB-57	XI	17221205	17222030	-	E	5	826
Chr01_18XHB-57	Chr01	18XHB-57	XI	17224762	17225586	-	E	5	825
Chr01_18XHB-57	Chr01	18XHB-57	XI	17244453	17245279	-	E	5	827
Chr01_18XHB-57	Chr01	18XHB-57	XI	17247279	17248270	-	E	6	992
Chr01_18XHB-57	Chr01	18XHB-57	XI	17248825	17249640	-	E	5	816
Chr01_18XHB-57	Chr01	18XHB-57	XI	17250503	17251329	-	E	5	827
Chr01_18XHB-57	Chr01	18XHB-57	XI	17260010	17261826	-	E	11	1817
Chr01_18XHB-57	Chr01	18XHB-57	XI	17263804	17265125	-	E	8	1322
Chr01_18XHB-57	Chr01	18XHB-57	XI	17273607	17274762	-	E	7	1156
Chr01_18XHB-57	Chr01	18XHB-57	XI	17280041	17280863	-	E	5	823
Chr01_18XHB-57	Chr01	18XHB-57	XI	17289842	17299537	+	H	34	9696
Chr01_18XHB-57	Chr01	18XHB-57	XI	17300341	17301270	+	H	6	930
Chr01_18XHB-57	Chr01	18XHB-57	XI	17302859	17307690	+	H	5	4832
Chr01_18XHB-57	Chr01	18XHB-57	XI	17313250	17314164	+	H	6	915
Chr01_18XHB-57	Chr01	18XHB-57	XI	17314958	17315729	+	H	5	772
Chr01_18XHB-57	Chr01	18XHB-57	XI	17315895	17316822	+	H	6	928
Chr01_18XHB-57	Chr01	18XHB-57	XI	17317937	17319019	+	H	7	1083
Chr01_18XHB-57	Chr01	18XHB-57	XI	17321540	17322623	+	H	7	1084
Chr01_18XHB-57	Chr01	18XHB-57	XI	17323261	17324034	+	H	5	774
Chr01_18XHB-57	Chr01	18XHB-57	XI	17333622	17334392	+	H	5	771
Chr01_18XHB-57	Chr01	18XHB-57	XI	17435858	17436626	-	H	5	769
Chr01_18XHB-57	Chr01	18XHB-57	XI	17440159	17441480	-	E	8	1322
Chr01_18XHB-57	Chr01	18XHB-57	XI	17475905	17476677	-	H	5	773
Chr01_18XHB-57	Chr01	18XHB-57	XI	17480217	17480989	-	H	5	773
Chr01_18XHB-57	Chr01	18XHB-57	XI	17492112	17493598	-	E	9	1487
Chr01_18XHB-57	Chr01	18XHB-57	XI	17494390	17495211	-	E	5	822
Chr01_18XHB-57	Chr01	18XHB-57	XI	17495519	17496340	-	E	5	822
Chr01_18XHB-57	Chr01	18XHB-57	XI	17498441	17499595	-	E	7	1155
Chr01_18XHB-57	Chr01	18XHB-57	XI	17517063	17518147	+	H	7	1085
Chr01_18XHB-57	Chr01	18XHB-57	XI	17518789	17519719	+	H	6	931
Chr01_18XHB-57	Chr01	18XHB-57	XI	17520516	17521446	+	H	6	931
Chr01_18XHB-57	Chr01	18XHB-57	XI	17522243	17523018	+	H	5	776
Chr01_18XHB-57	Chr01	18XHB-57	XI	17523815	17531530	+	H	21	7716
Chr01_18XHB-57	Chr01	18XHB-57	XI	17531696	17535569	+	H	25	3874
Chr01_18XHB-57	Chr01	18XHB-57	XI	17536521	17537450	+	H	6	930
Chr01_18XHB-57	Chr01	18XHB-57	XI	17537616	17538546	+	H	6	931
Chr01_18XHB-57	Chr01	18XHB-57	XI	17538713	17540262	+	H	10	1550
Chr01_18XHB-57	Chr01	18XHB-57	XI	17540428	17541357	+	H	6	930
Chr01_18XHB-57	Chr01	18XHB-57	XI	17541523	17542608	+	H	7	1086
Chr01_18XHB-57	Chr01	18XHB-57	XI	17542775	17546478	+	H	24	3704
Chr01_18XHB-57	Chr01	18XHB-57	XI	17546644	17547573	+	H	6	930
Chr01_18XHB-57	Chr01	18XHB-57	XI	17547739	17548508	+	H	5	770
Chr01_18XHB-57	Chr01	18XHB-57	XI	17548673	17550527	+	H	12	1855
Chr01_18XHB-57	Chr01	18XHB-57	XI	17551166	17552555	+	H	9	1390
Chr01_18XHB-57	Chr01	18XHB-57	XI	17553513	17554283	+	H	5	771
Chr01_18XHB-57	Chr01	18XHB-57	XI	17555241	17556011	+	H	5	771
Chr01_18XHB-57	Chr01	18XHB-57	XI	17556802	17557726	+	H	6	925
Chr01_18XHB-57	Chr01	18XHB-57	XI	17558517	17559441	+	H	6	925
Chr01_18XHB-57	Chr01	18XHB-57	XI	17559606	17560376	+	H	5	771
Chr01_18XHB-57	Chr01	18XHB-57	XI	17561167	17561936	+	H	5	770
Chr01_18XHB-57	Chr01	18XHB-57	XI	17562727	17563496	+	H	5	770
Chr01_18XHB-57	Chr01	18XHB-57	XI	17563661	17565438	+	H	11	1778
Chr01_18XHB-57	Chr01	18XHB-57	XI	17570319	17572638	+	H	15	2320
Chr01_18XHB-57	Chr01	18XHB-57	XI	17573431	17587631	+	H	92	14201
Chr01_18XHB-57	Chr01	18XHB-57	XI	17594189	17596492	+	H	15	2304
Chr01_18XHB-57	Chr01	18XHB-57	XI	17596658	17598353	+	H	11	1696
Chr01_18XHB-57	Chr01	18XHB-57	XI	17598993	17599767	+	H	5	775
Chr01_18XHB-57	Chr01	18XHB-57	XI	17600562	17601336	+	H	5	775
Chr01_18XHB-57	Chr01	18XHB-57	XI	17602915	17607840	+	H	32	4926
Chr01_18XHB-57	Chr01	18XHB-57	XI	17608005	17609546	+	H	10	1542
Chr01_18XHB-57	Chr01	18XHB-57	XI	17609829	17610540	+	H	5	712
Chr01_18XHB-57	Chr01	18XHB-57	XI	17611180	17611946	+	H	5	767
Chr01_18XHB-57	Chr01	18XHB-57	XI	17612111	17613040	+	H	6	930
Chr01_18XHB-57	Chr01	18XHB-57	XI	17613323	17614034	+	H	5	712
Chr01_18XHB-57	Chr01	18XHB-57	XI	17615313	17616087	+	H	5	775
Chr01_18XHB-57	Chr01	18XHB-57	XI	17617365	17618138	+	H	5	774
Chr01_18XHB-57	Chr01	18XHB-57	XI	17619881	17620808	+	H	6	928
Chr01_18XHB-57	Chr01	18XHB-57	XI	17623521	17624294	+	H	5	774
Chr01_18XHB-57	Chr01	18XHB-57	XI	17626534	17629148	+	H	17	2615
Chr01_18XHB-57	Chr01	18XHB-57	XI	17629280	17631573	+	H	15	2294
Chr01_18XHB-57	Chr01	18XHB-57	XI	17631705	17633994	+	H	15	2290
Chr01_18XHB-57	Chr01	18XHB-57	XI	17634160	17637199	+	H	13	3040
Chr01_18XHB-57	Chr01	18XHB-57	XI	17637365	17638134	+	H	5	770
Chr01_18XHB-57	Chr01	18XHB-57	XI	17638300	17639991	+	H	11	1692
Chr01_18XHB-57	Chr01	18XHB-57	XI	17640157	17642309	+	H	14	2153
Chr01_18XHB-57	Chr01	18XHB-57	XI	17642475	17645236	+	H	18	2762
Chr01_18XHB-57	Chr01	18XHB-57	XI	17645402	17648782	+	H	22	3381
Chr01_18XHB-57	Chr01	18XHB-57	XI	17648948	17651100	+	H	14	2153
Chr01_18XHB-57	Chr01	18XHB-57	XI	17651266	17658670	+	H	24	7405
Chr01_18XHB-57	Chr01	18XHB-57	XI	17658836	17663619	+	H	31	4784
Chr01_18XHB-57	Chr01	18XHB-57	XI	17663785	17666719	+	H	19	2935
Chr01_18XHB-57	Chr01	18XHB-57	XI	17666885	17667655	+	H	5	771
Chr01_18XHB-57	Chr01	18XHB-57	XI	17667821	17673992	+	H	40	6172
Chr01_18XHB-57	Chr01	18XHB-57	XI	17674158	17676936	+	H	18	2779
Chr01_18XHB-57	Chr01	18XHB-57	XI	17677102	17691758	+	H	95	14657
Chr01_18XHB-57	Chr01	18XHB-57	XI	17691924	17703853	+	H	46	11930
Chr01_18XHB-57	Chr01	18XHB-57	XI	17704019	17706521	+	H	11	2503
Chr01_18XHB-57	Chr01	18XHB-57	XI	17708181	17709005	-	E	5	825
Chr01_18XHB-57	Chr01	18XHB-57	XI	17718181	17719330	-	E	7	1150
Chr01_18XHB-57	Chr01	18XHB-57	XI	17722231	17722975	-	H	5	745
Chr01_18XHB-57	Chr01	18XHB-57	XI	17722999	17723767	+	H	5	769
Chr01_18XHB-57	Chr01	18XHB-57	XI	17724728	17725501	+	H	5	774
Chr01_18XHB-57	Chr01	18XHB-57	XI	17728197	17728970	+	H	5	774
Chr01_18XHB-57	Chr01	18XHB-57	XI	17733599	17734838	+	H	8	1240
Chr01_18XHB-57	Chr01	18XHB-57	XI	17735000	17735774	+	H	5	775
Chr01_18XHB-57	Chr01	18XHB-57	XI	17735936	17737330	+	H	9	1395
Chr01_18XHB-57	Chr01	18XHB-57	XI	17738277	17739051	+	H	5	775
Chr01_18XHB-57	Chr01	18XHB-57	XI	17739213	17739987	+	H	5	775
Chr01_18XHB-57	Chr01	18XHB-57	XI	17740153	17741237	+	H	7	1085
Chr01_18XHB-57	Chr01	18XHB-57	XI	17741724	17747542	+	H	9	5819
Chr01_18XHB-57	Chr01	18XHB-57	XI	17751341	17752119	+	H	5	779
Chr01_18XHB-57	Chr01	18XHB-57	XI	17753547	17755563	+	H	13	2017
Chr01_18XHB-57	Chr01	18XHB-57	XI	17788956	17789836	+	H	6	881
Chr01_18XHB-57	Chr01	18XHB-57	XI	17793967	17794847	+	H	6	881
Chr01_18XHB-57	Chr01	18XHB-57	XI	17795798	17796572	+	H	5	775
Chr01_18XHB-57	Chr01	18XHB-57	XI	17798881	17809149	+	H	8	10269
Chr01_18XHB-57	Chr01	18XHB-57	XI	17812247	17820285	+	H	5	8039
Chr01_18XHB-57	Chr01	18XHB-57	XI	17821236	17822320	+	H	7	1085
Chr01_18XHB-57	Chr01	18XHB-57	XI	17822801	17834024	+	H	9	11224
Chr01_18XHB-57	Chr01	18XHB-57	XI	17837028	17839975	+	H	19	2948
Chr01_18XHB-57	Chr01	18XHB-57	XI	17841236	17842787	+	H	10	1552
Chr01_18XHB-57	Chr01	18XHB-57	XI	17845892	17846641	+	H	5	750
Chr01_18XHB-57	Chr01	18XHB-57	XI	17868762	17869487	+	H	5	726
Chr01_18XHB-57	Chr01	18XHB-57	XI	17870987	17871712	+	H	5	726
Chr01_18XHB-57	Chr01	18XHB-57	XI	17873212	17873937	+	H	5	726
Chr01_18XHB-57	Chr01	18XHB-57	XI	17874402	17875127	+	H	5	726
Chr01_18XHB-57	Chr01	18XHB-57	XI	17878778	17879552	+	H	5	775
Chr01_18XHB-57	Chr01	18XHB-57	XI	17883297	17884071	+	H	5	775
Chr01_18XHB-57	Chr01	18XHB-57	XI	17884237	17885011	+	H	5	775
Chr01_18XHB-57	Chr01	18XHB-57	XI	17885177	17885951	+	H	5	775
Chr01_18XHB-57	Chr01	18XHB-57	XI	17897151	17898063	+	H	6	913
Chr01_18XHB-57	Chr01	18XHB-57	XI	17901172	17908252	+	H	5	7081
Chr01_18XHB-57	Chr01	18XHB-57	XI	17909203	17910287	+	H	7	1085
Chr01_18XHB-57	Chr01	18XHB-57	XI	17911878	17912962	+	H	7	1085
Chr01_18XHB-57	Chr01	18XHB-57	XI	17914553	17915637	+	H	7	1085
Chr01_18XHB-57	Chr01	18XHB-57	XI	17916279	17922094	+	H	9	5816
Chr01_18XHB-57	Chr01	18XHB-57	XI	17929972	17932607	+	H	17	2636
Chr01_18XHB-57	Chr01	18XHB-57	XI	17932772	17934166	+	H	9	1395
Chr01_18XHB-57	Chr01	18XHB-57	XI	17935591	17938071	+	H	16	2481
Chr01_18XHB-57	Chr01	18XHB-57	XI	17938237	17940717	+	H	16	2481
Chr01_18XHB-57	Chr01	18XHB-57	XI	17940883	17944293	+	H	22	3411
Chr01_18XHB-57	Chr01	18XHB-57	XI	17945088	17945862	+	H	5	775
Chr01_18XHB-57	Chr01	18XHB-57	XI	17949627	17950401	+	H	5	775
Chr01_18XHB-57	Chr01	18XHB-57	XI	17950566	17952270	+	H	11	1705
Chr01_18XHB-57	Chr01	18XHB-57	XI	17952436	17953370	+	H	6	935
Chr01_18XHB-57	Chr01	18XHB-57	XI	17953536	17954310	+	H	5	775
Chr01_18XHB-57	Chr01	18XHB-57	XI	17955700	17956629	+	H	6	930
Chr01_18XHB-57	Chr01	18XHB-57	XI	17956795	17957573	+	H	5	779
Chr01_18XHB-57	Chr01	18XHB-57	XI	17958843	17960245	+	H	9	1403
Chr01_18XHB-57	Chr01	18XHB-57	XI	17962147	17962925	+	H	5	779
Chr01_18XHB-57	Chr01	18XHB-57	XI	17963091	17964641	+	H	10	1551
Chr01_18XHB-57	Chr01	18XHB-57	XI	18054791	18055565	+	H	5	775
Chr01_18XHB-83	Chr01	18XHB-83	XI	16958807	16961269	-	E	15	2463
Chr01_18XHB-83	Chr01	18XHB-83	XI	16970223	16971047	-	E	5	825
Chr01_18XHB-83	Chr01	18XHB-83	XI	16971202	16972183	-	E	6	982
Chr01_18XHB-83	Chr01	18XHB-83	XI	16976911	16977900	-	E	6	990
Chr01_18XHB-83	Chr01	18XHB-83	XI	16981291	16982115	-	E	5	825
Chr01_18XHB-83	Chr01	18XHB-83	XI	17004353	17005176	-	E	5	824
Chr01_18XHB-83	Chr01	18XHB-83	XI	17006611	17007409	-	E	5	799
Chr01_18XHB-83	Chr01	18XHB-83	XI	17009144	17009967	-	E	5	824
Chr01_18XHB-83	Chr01	18XHB-83	XI	17020425	17021414	-	E	6	990
Chr01_18XHB-83	Chr01	18XHB-83	XI	17026304	17027237	+	H	6	934
Chr01_18XHB-83	Chr01	18XHB-83	XI	17052718	17053646	+	I	6	929
Chr01_18XHB-83	Chr01	18XHB-83	XI	17055512	17056440	+	I	6	929
Chr01_18XHB-83	Chr01	18XHB-83	XI	17067792	17068719	+	F	6	928
Chr01_18XHB-83	Chr01	18XHB-83	XI	17093704	17095352	-	E	10	1649
Chr01_18XHB-83	Chr01	18XHB-83	XI	17096618	17097772	-	E	7	1155
Chr01_18XHB-83	Chr01	18XHB-83	XI	17116395	17117219	-	E	5	825
Chr01_18XHB-83	Chr01	18XHB-83	XI	17125134	17126119	-	E	6	986
Chr01_18XHB-83	Chr01	18XHB-83	XI	17155147	17157611	-	E	15	2465
Chr01_18XHB-83	Chr01	18XHB-83	XI	17159824	17162288	-	E	15	2465
Chr01_18XHB-83	Chr01	18XHB-83	XI	17163708	17164859	-	E	7	1152
Chr01_18XHB-83	Chr01	18XHB-83	XI	17199940	17201093	-	E	7	1154
Chr01_18XHB-83	Chr01	18XHB-83	XI	17201248	17202072	-	E	5	825
Chr01_18XHB-83	Chr01	18XHB-83	XI	17207738	17208561	-	E	5	824
Chr01_18XHB-83	Chr01	18XHB-83	XI	17209202	17215753	-	I	12	6552
Chr01_18XHB-83	Chr01	18XHB-83	XI	17215922	17216687	-	I	5	766
Chr01_18XHB-83	Chr01	18XHB-83	XI	17240359	17241344	-	E	6	986
Chr01_18XHB-83	Chr01	18XHB-83	XI	17241481	17242309	-	E	5	829
Chr01_18XHB-83	Chr01	18XHB-83	XI	17285613	17286436	-	E	5	824
Chr01_18XHB-83	Chr01	18XHB-83	XI	17360204	17361443	+	I	8	1240
Chr01_18XHB-83	Chr01	18XHB-83	XI	17361920	17363158	+	I	8	1239
Chr01_18XHB-83	Chr01	18XHB-83	XI	17363635	17365029	+	I	9	1395
Chr01_18XHB-83	Chr01	18XHB-83	XI	17366313	17367862	+	I	10	1550
Chr01_18XHB-83	Chr01	18XHB-83	XI	17408253	17409017	+	F	5	765
Chr01_18XHB-83	Chr01	18XHB-83	XI	17410414	17412568	+	F	14	2155
Chr01_18XHB-83	Chr01	18XHB-83	XI	17413828	17415217	+	F	9	1390
Chr01_18XHB-83	Chr01	18XHB-83	XI	17418501	17419427	+	F	6	927
Chr01_18XHB-83	Chr01	18XHB-83	XI	17420687	17422228	+	F	10	1542
Chr01_18XHB-83	Chr01	18XHB-83	XI	17423783	17424553	+	F	5	771
Chr01_18XHB-83	Chr01	18XHB-83	XI	17434113	17435037	+	F	6	925
Chr01_18XHB-83	Chr01	18XHB-83	XI	17435832	17436756	+	F	6	925
Chr01_9311	Chr01	9311	XI	17570497	17571486	-	E	6	990
Chr01_9311	Chr01	9311	XI	17589344	17590113	-	H	5	770
Chr01_9311	Chr01	9311	XI	17590598	17591369	-	H	5	772
Chr01_9311	Chr01	9311	XI	17620312	17624187	+	H	25	3876
Chr01_9311	Chr01	9311	XI	17631218	17632763	+	H	10	1546
Chr01_9311	Chr01	9311	XI	17633249	17634330	+	H	7	1082
Chr01_9311	Chr01	9311	XI	17634495	17635578	+	H	7	1084
Chr01_9311	Chr01	9311	XI	17636373	17637145	+	H	5	773
Chr01_9311	Chr01	9311	XI	17637311	17638547	+	H	8	1237
Chr01_9311	Chr01	9311	XI	17685688	17687174	-	E	9	1487
Chr01_9311	Chr01	9311	XI	17709539	17711185	-	E	10	1647
Chr01_9311	Chr01	9311	XI	17712461	17713280	-	E	5	820
Chr01_9311	Chr01	9311	XI	17717308	17718243	-	E	5	936
Chr01_9311	Chr01	9311	XI	17774523	17775295	-	H	5	773
Chr01_9311	Chr01	9311	XI	17779996	17780768	-	H	5	773
Chr01_9311	Chr01	9311	XI	17781723	17782794	-	H	7	1072
Chr01_9311	Chr01	9311	XI	17782957	17783874	-	H	6	918
Chr01_9311	Chr01	9311	XI	17786267	17787086	-	E	5	820
Chr01_9311	Chr01	9311	XI	17787894	17789042	-	E	7	1149
Chr01_9311	Chr01	9311	XI	17791292	17792440	-	E	7	1149
Chr01_9311	Chr01	9311	XI	17810216	17810985	-	H	5	770
Chr01_9311	Chr01	9311	XI	17811479	17812248	-	H	5	770
Chr01_9311	Chr01	9311	XI	17812742	17813511	-	H	5	770
Chr01_9311	Chr01	9311	XI	17815115	17815884	-	H	5	770
Chr01_9311	Chr01	9311	XI	17816378	17817147	-	H	5	770
Chr01_9311	Chr01	9311	XI	17817641	17818410	-	H	5	770
Chr01_9311	Chr01	9311	XI	17822851	17823620	-	H	5	770
Chr01_9311	Chr01	9311	XI	17840052	17840864	-	E	5	813
Chr01_9311	Chr01	9311	XI	17841504	17842276	-	H	5	773
Chr01_9311	Chr01	9311	XI	17851319	17852124	-	E	5	806
Chr01_9311	Chr01	9311	XI	17856360	17857185	-	E	5	826
Chr01_9311	Chr01	9311	XI	17895796	17896726	+	H	6	931
Chr01_9311	Chr01	9311	XI	17899775	17900550	+	H	5	776
Chr01_9311	Chr01	9311	XI	17903778	17904708	+	H	6	931
Chr01_9311	Chr01	9311	XI	17906488	17907263	+	H	5	776
Chr01_9311	Chr01	9311	XI	17911917	17912692	+	H	5	776
Chr01_9311	Chr01	9311	XI	17913656	17915514	+	H	12	1859
Chr01_9311	Chr01	9311	XI	17917289	17918218	+	H	6	930
Chr01_9311	Chr01	9311	XI	17918704	17946900	+	H	6	28197
Chr01_9311	Chr01	9311	XI	17947066	17947997	+	H	6	932
Chr01_9311	Chr01	9311	XI	17948163	17949251	+	H	7	1089
Chr01_9311	Chr01	9311	XI	17949583	17950513	+	H	6	931
Chr01_9311	Chr01	9311	XI	17955141	17956690	+	H	10	1550
Chr01_9311	Chr01	9311	XI	17957487	17958421	+	H	6	935
Chr01_9311	Chr01	9311	XI	17958586	17959519	+	H	6	934
Chr01_9311	Chr01	9311	XI	17959684	17960618	+	H	6	935
Chr01_9311	Chr01	9311	XI	17960783	17967692	+	H	15	6910
Chr01_9311	Chr01	9311	XI	17968489	17969422	+	H	6	934
Chr01_9311	Chr01	9311	XI	17969588	17970828	+	H	8	1241
Chr01_9311	Chr01	9311	XI	17971772	17972859	+	H	7	1088
Chr01_9311	Chr01	9311	XI	17973025	17974575	+	H	10	1551
Chr01_9311	Chr01	9311	XI	17975372	17980642	+	H	34	5271
Chr01_9311	Chr01	9311	XI	17981438	17982368	+	H	6	931
Chr01_9311	Chr01	9311	XI	17983164	17984559	+	H	9	1396
Chr01_9311	Chr01	9311	XI	17985200	17991633	+	H	13	6434
Chr01_9311	Chr01	9311	XI	17992275	17996150	+	H	25	3876
Chr01_9311	Chr01	9311	XI	17996316	17997246	+	H	6	931
Chr01_9311	Chr01	9311	XI	17997412	17998648	+	H	8	1237
Chr01_9311	Chr01	9311	XI	17999455	18002245	+	H	18	2791
Chr01_9311	Chr01	9311	XI	18003197	18004433	+	H	8	1237
Chr01_9311	Chr01	9311	XI	18005240	18006015	+	H	5	776
Chr01_9311	Chr01	9311	XI	18006180	18007109	+	H	6	930
Chr01_9311	Chr01	9311	XI	18007275	18008050	+	H	5	776
Chr01_9311	Chr01	9311	XI	18009960	18010884	+	H	6	925
Chr01_9311	Chr01	9311	XI	18011523	18013063	+	H	10	1541
Chr01_9311	Chr01	9311	XI	18013228	18014461	+	H	8	1234
Chr01_9311	Chr01	9311	XI	18014625	18015549	+	H	6	925
Chr01_9311	Chr01	9311	XI	18016509	18018190	+	H	11	1682
Chr01_9311	Chr01	9311	XI	18018983	18020045	+	H	7	1063
Chr01_9311	Chr01	9311	XI	18032535	18033597	+	H	7	1063
Chr01_9311	Chr01	9311	XI	18035811	18036873	+	H	7	1063
Chr01_9311	Chr01	9311	XI	18129161	18130238	+	H	7	1078
Chr01_9311	Chr01	9311	XI	18131666	18132590	+	H	6	925
Chr01_9311	Chr01	9311	XI	18132756	18134605	+	H	12	1850
Chr01_9311	Chr01	9311	XI	18134771	18136930	+	H	14	2160
Chr01_9311	Chr01	9311	XI	18137095	18138794	+	H	11	1700
Chr01_9311	Chr01	9311	XI	18138959	18140351	+	H	9	1393
Chr01_9311	Chr01	9311	XI	18140517	18141593	+	H	7	1077
Chr01_9311	Chr01	9311	XI	18142237	18144396	+	H	14	2160
Chr01_9311	Chr01	9311	XI	18144562	18145638	+	H	7	1077
Chr01_9311	Chr01	9311	XI	18146282	18147826	+	H	10	1545
Chr01_9311	Chr01	9311	XI	18147992	18149385	+	H	9	1394
Chr01_9311	Chr01	9311	XI	18149551	18154036	+	H	29	4486
Chr01_9311	Chr01	9311	XI	18154202	18154973	+	H	5	772
Chr01_9311	Chr01	9311	XI	18156089	18157475	+	H	9	1387
Chr01_9311	Chr01	9311	XI	18159211	18160449	+	H	8	1239
Chr01_9311	Chr01	9311	XI	18160614	18162782	+	H	14	2169
Chr01_9311	Chr01	9311	XI	18162948	18164030	+	H	7	1083
Chr01_9311	Chr01	9311	XI	18164516	18165900	+	H	9	1385
Chr01_9311	Chr01	9311	XI	18166856	18169011	+	H	14	2156
Chr01_9311	Chr01	9311	XI	18191464	18192848	+	H	9	1385
Chr01_9311	Chr01	9311	XI	18193334	18194104	+	H	5	771
Chr01_9311	Chr01	9311	XI	18194270	18195193	+	H	6	924
Chr01_9311	Chr01	9311	XI	18195359	18196588	+	H	8	1230
Chr01_9311	Chr01	9311	XI	18196754	18202284	+	H	10	5531
Chr01_9311	Chr01	9311	XI	18218165	18218939	+	H	5	775
Chr01_9311	Chr01	9311	XI	18322294	18323061	+	H	5	768
Chr01_9311	Chr01	9311	XI	18323702	18324475	+	H	5	774
Chr01_Balatinaw	Chr01	Balatinaw	XI	17180625	17181614	-	E	6	990
Chr01_Balatinaw	Chr01	Balatinaw	XI	17200781	17201550	-	H	5	770
Chr01_Balatinaw	Chr01	Balatinaw	XI	17202035	17202806	-	H	5	772
Chr01_Balatinaw	Chr01	Balatinaw	XI	17224364	17230390	-	E	11	6027
Chr01_Balatinaw	Chr01	Balatinaw	XI	17240386	17242246	+	H	12	1861
Chr01_Balatinaw	Chr01	Balatinaw	XI	17249311	17250856	+	H	10	1546
Chr01_Balatinaw	Chr01	Balatinaw	XI	17251342	17252423	+	H	7	1082
Chr01_Balatinaw	Chr01	Balatinaw	XI	17252588	17253671	+	H	7	1084
Chr01_Balatinaw	Chr01	Balatinaw	XI	17254467	17255239	+	H	5	773
Chr01_Balatinaw	Chr01	Balatinaw	XI	17255405	17256178	+	H	5	774
Chr01_Balatinaw	Chr01	Balatinaw	XI	17257604	17258376	+	H	5	773
Chr01_Balatinaw	Chr01	Balatinaw	XI	17258542	17259778	+	H	8	1237
Chr01_Balatinaw	Chr01	Balatinaw	XI	17296111	17298587	-	E	15	2477
Chr01_Balatinaw	Chr01	Balatinaw	XI	17320479	17322121	-	E	10	1643
Chr01_Balatinaw	Chr01	Balatinaw	XI	17323401	17324217	-	E	5	817
Chr01_Balatinaw	Chr01	Balatinaw	XI	17328248	17329179	-	E	5	932
Chr01_Balatinaw	Chr01	Balatinaw	XI	17399728	17400500	-	H	5	773
Chr01_Balatinaw	Chr01	Balatinaw	XI	17401455	17402680	-	H	8	1226
Chr01_Balatinaw	Chr01	Balatinaw	XI	17403635	17404552	-	H	6	918
Chr01_Balatinaw	Chr01	Balatinaw	XI	17404715	17405786	-	H	7	1072
Chr01_Balatinaw	Chr01	Balatinaw	XI	17408179	17408998	-	E	5	820
Chr01_Balatinaw	Chr01	Balatinaw	XI	17409806	17410948	-	E	7	1143
Chr01_Balatinaw	Chr01	Balatinaw	XI	17413204	17414352	-	E	7	1149
Chr01_Balatinaw	Chr01	Balatinaw	XI	17418493	17419642	-	E	7	1150
Chr01_Balatinaw	Chr01	Balatinaw	XI	17425539	17426308	-	H	5	770
Chr01_Balatinaw	Chr01	Balatinaw	XI	17426802	17427571	-	H	5	770
Chr01_Balatinaw	Chr01	Balatinaw	XI	17428065	17428834	-	H	5	770
Chr01_Balatinaw	Chr01	Balatinaw	XI	17429328	17430097	-	H	5	770
Chr01_Balatinaw	Chr01	Balatinaw	XI	17430591	17431362	-	H	5	772
Chr01_Balatinaw	Chr01	Balatinaw	XI	17431856	17432627	-	H	5	772
Chr01_Balatinaw	Chr01	Balatinaw	XI	17434231	17435000	-	H	5	770
Chr01_Balatinaw	Chr01	Balatinaw	XI	17435494	17436263	-	H	5	770
Chr01_Balatinaw	Chr01	Balatinaw	XI	17458377	17459189	-	E	5	813
Chr01_Balatinaw	Chr01	Balatinaw	XI	17459829	17460601	-	H	5	773
Chr01_Balatinaw	Chr01	Balatinaw	XI	17469644	17470449	-	E	5	806
Chr01_Balatinaw	Chr01	Balatinaw	XI	17474685	17475510	-	E	5	826
Chr01_Balatinaw	Chr01	Balatinaw	XI	17511075	17512005	+	H	6	931
Chr01_Balatinaw	Chr01	Balatinaw	XI	17515054	17515829	+	H	5	776
Chr01_Balatinaw	Chr01	Balatinaw	XI	17517609	17518539	+	H	6	931
Chr01_Balatinaw	Chr01	Balatinaw	XI	17520319	17521094	+	H	5	776
Chr01_Balatinaw	Chr01	Balatinaw	XI	17522874	17523649	+	H	5	776
Chr01_Balatinaw	Chr01	Balatinaw	XI	17524613	17526626	+	H	13	2014
Chr01_Balatinaw	Chr01	Balatinaw	XI	17528079	17529008	+	H	6	930
Chr01_Balatinaw	Chr01	Balatinaw	XI	17529494	17557690	+	H	6	28197
Chr01_Balatinaw	Chr01	Balatinaw	XI	17557856	17558787	+	H	6	932
Chr01_Balatinaw	Chr01	Balatinaw	XI	17558953	17560350	+	H	9	1398
Chr01_Balatinaw	Chr01	Balatinaw	XI	17567337	17568268	+	H	6	932
Chr01_Balatinaw	Chr01	Balatinaw	XI	17570970	17571901	+	H	6	932
Chr01_Balatinaw	Chr01	Balatinaw	XI	17573817	17575211	+	H	9	1395
Chr01_Balatinaw	Chr01	Balatinaw	XI	17576008	17576942	+	H	6	935
Chr01_Balatinaw	Chr01	Balatinaw	XI	17577107	17578041	+	H	6	935
Chr01_Balatinaw	Chr01	Balatinaw	XI	17578206	17579140	+	H	6	935
Chr01_Balatinaw	Chr01	Balatinaw	XI	17579936	17580870	+	H	6	935
Chr01_Balatinaw	Chr01	Balatinaw	XI	17581035	17581969	+	H	6	935
Chr01_Balatinaw	Chr01	Balatinaw	XI	17582134	17583068	+	H	6	935
Chr01_Balatinaw	Chr01	Balatinaw	XI	17583233	17590141	+	H	16	6909
Chr01_Balatinaw	Chr01	Balatinaw	XI	17590307	17591083	+	H	5	777
Chr01_Balatinaw	Chr01	Balatinaw	XI	17591249	17592182	+	H	6	934
Chr01_Balatinaw	Chr01	Balatinaw	XI	17592348	17593898	+	H	10	1551
Chr01_Balatinaw	Chr01	Balatinaw	XI	17594853	17595940	+	H	7	1088
Chr01_Balatinaw	Chr01	Balatinaw	XI	17596106	17597656	+	H	10	1551
Chr01_Balatinaw	Chr01	Balatinaw	XI	17598453	17599386	+	H	6	934
Chr01_Balatinaw	Chr01	Balatinaw	XI	17600341	17601891	+	H	10	1551
Chr01_Balatinaw	Chr01	Balatinaw	XI	17602846	17603933	+	H	7	1088
Chr01_Balatinaw	Chr01	Balatinaw	XI	17604099	17605649	+	H	10	1551
Chr01_Balatinaw	Chr01	Balatinaw	XI	17606446	17608921	+	H	16	2476
Chr01_Balatinaw	Chr01	Balatinaw	XI	17609718	17611576	+	H	12	1859
Chr01_Balatinaw	Chr01	Balatinaw	XI	17612218	17616093	+	H	25	3876
Chr01_Balatinaw	Chr01	Balatinaw	XI	17616889	17617819	+	H	6	931
Chr01_Balatinaw	Chr01	Balatinaw	XI	17618615	17620010	+	H	9	1396
Chr01_Balatinaw	Chr01	Balatinaw	XI	17620651	17622666	+	H	13	2016
Chr01_Balatinaw	Chr01	Balatinaw	XI	17623308	17627183	+	H	25	3876
Chr01_Balatinaw	Chr01	Balatinaw	XI	17627349	17628279	+	H	6	931
Chr01_Balatinaw	Chr01	Balatinaw	XI	17628445	17637466	+	H	8	9022
Chr01_Balatinaw	Chr01	Balatinaw	XI	17638273	17639513	+	H	8	1241
Chr01_Balatinaw	Chr01	Balatinaw	XI	17639679	17640454	+	H	5	776
Chr01_Balatinaw	Chr01	Balatinaw	XI	17641731	17642655	+	H	6	925
Chr01_Balatinaw	Chr01	Balatinaw	XI	17643294	17644834	+	H	10	1541
Chr01_Balatinaw	Chr01	Balatinaw	XI	17644999	17646232	+	H	8	1234
Chr01_Balatinaw	Chr01	Balatinaw	XI	17646396	17647320	+	H	6	925
Chr01_Balatinaw	Chr01	Balatinaw	XI	17648280	17649956	+	H	11	1677
Chr01_Balatinaw	Chr01	Balatinaw	XI	17650749	17651811	+	H	7	1063
Chr01_Balatinaw	Chr01	Balatinaw	XI	17670094	17671171	+	H	7	1078
Chr01_Balatinaw	Chr01	Balatinaw	XI	17673386	17674310	+	H	6	925
Chr01_Balatinaw	Chr01	Balatinaw	XI	17674476	17676325	+	H	12	1850
Chr01_Balatinaw	Chr01	Balatinaw	XI	17676491	17678495	+	H	13	2005
Chr01_Balatinaw	Chr01	Balatinaw	XI	17678660	17680052	+	H	9	1393
Chr01_Balatinaw	Chr01	Balatinaw	XI	17680218	17681294	+	H	7	1077
Chr01_Balatinaw	Chr01	Balatinaw	XI	17681938	17683637	+	H	11	1700
Chr01_Balatinaw	Chr01	Balatinaw	XI	17683803	17688289	+	H	29	4487
Chr01_Balatinaw	Chr01	Balatinaw	XI	17688455	17689532	+	H	7	1078
Chr01_Balatinaw	Chr01	Balatinaw	XI	17689698	17690775	+	H	7	1078
Chr01_Balatinaw	Chr01	Balatinaw	XI	17691891	17697713	+	H	9	5823
Chr01_Balatinaw	Chr01	Balatinaw	XI	17698808	17700819	+	H	13	2012
Chr01_Balatinaw	Chr01	Balatinaw	XI	17700985	17702067	+	H	7	1083
Chr01_Balatinaw	Chr01	Balatinaw	XI	17702553	17703936	+	H	9	1384
Chr01_Balatinaw	Chr01	Balatinaw	XI	17704892	17706587	+	H	11	1696
Chr01_Balatinaw	Chr01	Balatinaw	XI	17716445	17717829	+	H	9	1385
Chr01_Balatinaw	Chr01	Balatinaw	XI	17718315	17719085	+	H	5	771
Chr01_Balatinaw	Chr01	Balatinaw	XI	17719251	17720174	+	H	6	924
Chr01_Balatinaw	Chr01	Balatinaw	XI	17720340	17721569	+	H	8	1230
Chr01_Balatinaw	Chr01	Balatinaw	XI	17721735	17727265	+	H	9	5531
Chr01_Balatinaw	Chr01	Balatinaw	XI	17738962	17739736	+	H	5	775
Chr01_Balatinaw	Chr01	Balatinaw	XI	17826748	17827515	+	H	5	768
Chr01_Balatinaw	Chr01	Balatinaw	XI	17828156	17828929	+	H	5	774
Chr01_Cempo-Abang	Chr01	Cempo-Abang	XI	17182919	17183909	-	E	6	991
Chr01_Cempo-Abang	Chr01	Cempo-Abang	XI	17202922	17203691	-	H	5	770
Chr01_Cempo-Abang	Chr01	Cempo-Abang	XI	17204176	17204947	-	H	5	772
Chr01_Cempo-Abang	Chr01	Cempo-Abang	XI	17228253	17229893	-	E	10	1641
Chr01_Cempo-Abang	Chr01	Cempo-Abang	XI	17247010	17253521	+	H	42	6512
Chr01_Cempo-Abang	Chr01	Cempo-Abang	XI	17260586	17262440	+	H	12	1855
Chr01_Cempo-Abang	Chr01	Cempo-Abang	XI	17262605	17263533	+	H	6	929
Chr01_Cempo-Abang	Chr01	Cempo-Abang	XI	17263699	17264935	+	H	8	1237
Chr01_Cempo-Abang	Chr01	Cempo-Abang	XI	17309634	17312110	-	E	15	2477
Chr01_Cempo-Abang	Chr01	Cempo-Abang	XI	17334198	17335844	-	E	10	1647
Chr01_Cempo-Abang	Chr01	Cempo-Abang	XI	17337119	17337938	-	E	5	820
Chr01_Cempo-Abang	Chr01	Cempo-Abang	XI	17405728	17406500	-	H	5	773
Chr01_Cempo-Abang	Chr01	Cempo-Abang	XI	17407455	17408372	-	H	6	918
Chr01_Cempo-Abang	Chr01	Cempo-Abang	XI	17408535	17409606	-	H	7	1072
Chr01_Cempo-Abang	Chr01	Cempo-Abang	XI	17411999	17412818	-	E	5	820
Chr01_Cempo-Abang	Chr01	Cempo-Abang	XI	17413626	17414774	-	E	7	1149
Chr01_Cempo-Abang	Chr01	Cempo-Abang	XI	17417022	17418174	-	E	7	1153
Chr01_Cempo-Abang	Chr01	Cempo-Abang	XI	17422311	17423463	-	E	7	1153
Chr01_Cempo-Abang	Chr01	Cempo-Abang	XI	17430316	17431082	-	H	5	767
Chr01_Cempo-Abang	Chr01	Cempo-Abang	XI	17431579	17432345	-	H	5	767
Chr01_Cempo-Abang	Chr01	Cempo-Abang	XI	17433952	17434718	-	H	5	767
Chr01_Cempo-Abang	Chr01	Cempo-Abang	XI	17436325	17441519	-	H	5	5195
Chr01_Cempo-Abang	Chr01	Cempo-Abang	XI	17442013	17442782	-	H	5	770
Chr01_Cempo-Abang	Chr01	Cempo-Abang	XI	17444386	17445155	-	H	5	770
Chr01_Cempo-Abang	Chr01	Cempo-Abang	XI	17445649	17446418	-	H	5	770
Chr01_Cempo-Abang	Chr01	Cempo-Abang	XI	17450858	17451627	-	H	5	770
Chr01_Cempo-Abang	Chr01	Cempo-Abang	XI	17464276	17465045	-	H	5	770
Chr01_Cempo-Abang	Chr01	Cempo-Abang	XI	17485741	17486553	-	E	5	813
Chr01_Cempo-Abang	Chr01	Cempo-Abang	XI	17487193	17487965	-	H	5	773
Chr01_Cempo-Abang	Chr01	Cempo-Abang	XI	17497008	17497808	-	E	5	801
Chr01_Cempo-Abang	Chr01	Cempo-Abang	XI	17502041	17502861	-	E	5	821
Chr01_Cempo-Abang	Chr01	Cempo-Abang	XI	17541295	17542225	+	H	6	931
Chr01_Cempo-Abang	Chr01	Cempo-Abang	XI	17545274	17546204	+	H	6	931
Chr01_Cempo-Abang	Chr01	Cempo-Abang	XI	17547984	17548914	+	H	6	931
Chr01_Cempo-Abang	Chr01	Cempo-Abang	XI	17551501	17552276	+	H	5	776
Chr01_Cempo-Abang	Chr01	Cempo-Abang	XI	17553240	17555098	+	H	12	1859
Chr01_Cempo-Abang	Chr01	Cempo-Abang	XI	17556873	17557802	+	H	6	930
Chr01_Cempo-Abang	Chr01	Cempo-Abang	XI	17558288	17590916	+	H	6	32629
Chr01_Cempo-Abang	Chr01	Cempo-Abang	XI	17591082	17592013	+	H	6	932
Chr01_Cempo-Abang	Chr01	Cempo-Abang	XI	17592179	17593576	+	H	9	1398
Chr01_Cempo-Abang	Chr01	Cempo-Abang	XI	17600730	17601661	+	H	6	932
Chr01_Cempo-Abang	Chr01	Cempo-Abang	XI	17604054	17605913	+	H	12	1860
Chr01_Cempo-Abang	Chr01	Cempo-Abang	XI	17606710	17607644	+	H	6	935
Chr01_Cempo-Abang	Chr01	Cempo-Abang	XI	17607809	17614717	+	H	15	6909
Chr01_Cempo-Abang	Chr01	Cempo-Abang	XI	17615514	17616447	+	H	6	934
Chr01_Cempo-Abang	Chr01	Cempo-Abang	XI	17616613	17618163	+	H	10	1551
Chr01_Cempo-Abang	Chr01	Cempo-Abang	XI	17619118	17620205	+	H	7	1088
Chr01_Cempo-Abang	Chr01	Cempo-Abang	XI	17620371	17621921	+	H	10	1551
Chr01_Cempo-Abang	Chr01	Cempo-Abang	XI	17622876	17623963	+	H	7	1088
Chr01_Cempo-Abang	Chr01	Cempo-Abang	XI	17624129	17625679	+	H	10	1551
Chr01_Cempo-Abang	Chr01	Cempo-Abang	XI	17626476	17628951	+	H	16	2476
Chr01_Cempo-Abang	Chr01	Cempo-Abang	XI	17629748	17632068	+	H	15	2321
Chr01_Cempo-Abang	Chr01	Cempo-Abang	XI	17632710	17635344	+	H	17	2635
Chr01_Cempo-Abang	Chr01	Cempo-Abang	XI	17635986	17638621	+	H	17	2636
Chr01_Cempo-Abang	Chr01	Cempo-Abang	XI	17639417	17640347	+	H	6	931
Chr01_Cempo-Abang	Chr01	Cempo-Abang	XI	17641143	17642538	+	H	9	1396
Chr01_Cempo-Abang	Chr01	Cempo-Abang	XI	17643654	17645049	+	H	9	1396
Chr01_Cempo-Abang	Chr01	Cempo-Abang	XI	17645690	17647705	+	H	13	2016
Chr01_Cempo-Abang	Chr01	Cempo-Abang	XI	17648347	17652222	+	H	25	3876
Chr01_Cempo-Abang	Chr01	Cempo-Abang	XI	17652388	17653318	+	H	6	931
Chr01_Cempo-Abang	Chr01	Cempo-Abang	XI	17653484	17654720	+	H	8	1237
Chr01_Cempo-Abang	Chr01	Cempo-Abang	XI	17655527	17656767	+	H	8	1241
Chr01_Cempo-Abang	Chr01	Cempo-Abang	XI	17656933	17657708	+	H	5	776
Chr01_Cempo-Abang	Chr01	Cempo-Abang	XI	17658985	17659909	+	H	6	925
Chr01_Cempo-Abang	Chr01	Cempo-Abang	XI	17660074	17661924	+	H	12	1851
Chr01_Cempo-Abang	Chr01	Cempo-Abang	XI	17662089	17663322	+	H	8	1234
Chr01_Cempo-Abang	Chr01	Cempo-Abang	XI	17663486	17664410	+	H	6	925
Chr01_Cempo-Abang	Chr01	Cempo-Abang	XI	17665370	17667046	+	H	11	1677
Chr01_Cempo-Abang	Chr01	Cempo-Abang	XI	17667839	17668591	+	H	5	753
Chr01_Cempo-Abang	Chr01	Cempo-Abang	XI	17668758	17669820	+	H	7	1063
Chr01_Cempo-Abang	Chr01	Cempo-Abang	XI	17705941	17706643	+	H	5	703
Chr01_Cempo-Abang	Chr01	Cempo-Abang	XI	17737012	17738089	+	H	7	1078
Chr01_Cempo-Abang	Chr01	Cempo-Abang	XI	17740304	17741228	+	H	6	925
Chr01_Cempo-Abang	Chr01	Cempo-Abang	XI	17741394	17743243	+	H	12	1850
Chr01_Cempo-Abang	Chr01	Cempo-Abang	XI	17743409	17744185	+	H	5	777
Chr01_Cempo-Abang	Chr01	Cempo-Abang	XI	17745925	17746849	+	H	6	925
Chr01_Cempo-Abang	Chr01	Cempo-Abang	XI	17747015	17748864	+	H	12	1850
Chr01_Cempo-Abang	Chr01	Cempo-Abang	XI	17749030	17751034	+	H	13	2005
Chr01_Cempo-Abang	Chr01	Cempo-Abang	XI	17751199	17752591	+	H	9	1393
Chr01_Cempo-Abang	Chr01	Cempo-Abang	XI	17752757	17753833	+	H	7	1077
Chr01_Cempo-Abang	Chr01	Cempo-Abang	XI	17754477	17756176	+	H	11	1700
Chr01_Cempo-Abang	Chr01	Cempo-Abang	XI	17756342	17760827	+	H	29	4486
Chr01_Cempo-Abang	Chr01	Cempo-Abang	XI	17760993	17762070	+	H	7	1078
Chr01_Cempo-Abang	Chr01	Cempo-Abang	XI	17763186	17764573	+	H	9	1388
Chr01_Cempo-Abang	Chr01	Cempo-Abang	XI	17766308	17768011	+	H	11	1704
Chr01_Cempo-Abang	Chr01	Cempo-Abang	XI	17769283	17770666	+	H	9	1384
Chr01_Cempo-Abang	Chr01	Cempo-Abang	XI	17771622	17773777	+	H	14	2156
Chr01_Cempo-Abang	Chr01	Cempo-Abang	XI	17773944	17775178	+	H	8	1235
Chr01_Cempo-Abang	Chr01	Cempo-Abang	XI	17788883	17790263	+	H	9	1381
Chr01_Cempo-Abang	Chr01	Cempo-Abang	XI	17790749	17791523	+	H	5	775
Chr01_Cempo-Abang	Chr01	Cempo-Abang	XI	17791685	17792763	+	H	7	1079
Chr01_Cempo-Abang	Chr01	Cempo-Abang	XI	17792929	17794163	+	H	8	1235
Chr01_Cempo-Abang	Chr01	Cempo-Abang	XI	17810974	17811748	+	H	5	775
Chr01_Cempo-Abang	Chr01	Cempo-Abang	XI	17913939	17914706	+	H	5	768
Chr01_Cempo-Abang	Chr01	Cempo-Abang	XI	17915347	17916120	+	H	5	774
Chr01_Cempo-Ireng	Chr01	Cempo-Ireng	XI	16936622	16937582	-	J	6	961
Chr01_Cempo-Ireng	Chr01	Cempo-Ireng	XI	16995310	16996299	-	E	6	990
Chr01_Cempo-Ireng	Chr01	Cempo-Ireng	XI	17036178	17037818	-	E	10	1641
Chr01_Cempo-Ireng	Chr01	Cempo-Ireng	XI	17051875	17055750	+	H	25	3876
Chr01_Cempo-Ireng	Chr01	Cempo-Ireng	XI	17062815	17064360	+	H	10	1546
Chr01_Cempo-Ireng	Chr01	Cempo-Ireng	XI	17064846	17065927	+	H	7	1082
Chr01_Cempo-Ireng	Chr01	Cempo-Ireng	XI	17066092	17067175	+	H	7	1084
Chr01_Cempo-Ireng	Chr01	Cempo-Ireng	XI	17067971	17068743	+	H	5	773
Chr01_Cempo-Ireng	Chr01	Cempo-Ireng	XI	17110620	17113093	-	E	15	2474
Chr01_Cempo-Ireng	Chr01	Cempo-Ireng	XI	17135142	17136785	-	E	10	1644
Chr01_Cempo-Ireng	Chr01	Cempo-Ireng	XI	17195666	17196438	-	H	5	773
Chr01_Cempo-Ireng	Chr01	Cempo-Ireng	XI	17197393	17198310	-	H	6	918
Chr01_Cempo-Ireng	Chr01	Cempo-Ireng	XI	17198473	17199544	-	H	7	1072
Chr01_Cempo-Ireng	Chr01	Cempo-Ireng	XI	17201937	17202756	-	E	5	820
Chr01_Cempo-Ireng	Chr01	Cempo-Ireng	XI	17204861	17206000	-	E	7	1140
Chr01_Cempo-Ireng	Chr01	Cempo-Ireng	XI	17210151	17211300	-	E	7	1150
Chr01_Cempo-Ireng	Chr01	Cempo-Ireng	XI	17217197	17217966	-	H	5	770
Chr01_Cempo-Ireng	Chr01	Cempo-Ireng	XI	17218460	17219229	-	H	5	770
Chr01_Cempo-Ireng	Chr01	Cempo-Ireng	XI	17221943	17222712	-	H	5	770
Chr01_Cempo-Ireng	Chr01	Cempo-Ireng	XI	17224316	17225085	-	H	5	770
Chr01_Cempo-Ireng	Chr01	Cempo-Ireng	XI	17225579	17226348	-	H	5	770
Chr01_Cempo-Ireng	Chr01	Cempo-Ireng	XI	17226842	17227613	-	H	5	772
Chr01_Cempo-Ireng	Chr01	Cempo-Ireng	XI	17229217	17229988	-	H	5	772
Chr01_Cempo-Ireng	Chr01	Cempo-Ireng	XI	17231592	17232361	-	H	5	770
Chr01_Cempo-Ireng	Chr01	Cempo-Ireng	XI	17232855	17233624	-	H	5	770
Chr01_Cempo-Ireng	Chr01	Cempo-Ireng	XI	17235228	17235997	-	H	5	770
Chr01_Cempo-Ireng	Chr01	Cempo-Ireng	XI	17236491	17237260	-	H	5	770
Chr01_Cempo-Ireng	Chr01	Cempo-Ireng	XI	17237754	17238523	-	H	5	770
Chr01_Cempo-Ireng	Chr01	Cempo-Ireng	XI	17239017	17239786	-	H	5	770
Chr01_Cempo-Ireng	Chr01	Cempo-Ireng	XI	17240280	17241049	-	H	5	770
Chr01_Cempo-Ireng	Chr01	Cempo-Ireng	XI	17241543	17242312	-	H	5	770
Chr01_Cempo-Ireng	Chr01	Cempo-Ireng	XI	17242806	17243575	-	H	5	770
Chr01_Cempo-Ireng	Chr01	Cempo-Ireng	XI	17244069	17244838	-	H	5	770
Chr01_Cempo-Ireng	Chr01	Cempo-Ireng	XI	17245332	17246101	-	H	5	770
Chr01_Cempo-Ireng	Chr01	Cempo-Ireng	XI	17246595	17247364	-	H	5	770
Chr01_Cempo-Ireng	Chr01	Cempo-Ireng	XI	17247858	17248627	-	H	5	770
Chr01_Cempo-Ireng	Chr01	Cempo-Ireng	XI	17249121	17249890	-	H	5	770
Chr01_Cempo-Ireng	Chr01	Cempo-Ireng	XI	17255122	17255891	-	H	5	770
Chr01_Cempo-Ireng	Chr01	Cempo-Ireng	XI	17276269	17277081	-	E	5	813
Chr01_Cempo-Ireng	Chr01	Cempo-Ireng	XI	17277721	17278493	-	H	5	773
Chr01_Cempo-Ireng	Chr01	Cempo-Ireng	XI	17287536	17288342	-	E	5	807
Chr01_Cempo-Ireng	Chr01	Cempo-Ireng	XI	17292577	17293402	-	E	5	826
Chr01_Cempo-Ireng	Chr01	Cempo-Ireng	XI	17330732	17331662	+	H	6	931
Chr01_Cempo-Ireng	Chr01	Cempo-Ireng	XI	17334711	17335486	+	H	5	776
Chr01_Cempo-Ireng	Chr01	Cempo-Ireng	XI	17337266	17338041	+	H	5	776
Chr01_Cempo-Ireng	Chr01	Cempo-Ireng	XI	17339821	17340596	+	H	5	776
Chr01_Cempo-Ireng	Chr01	Cempo-Ireng	XI	17341560	17343573	+	H	13	2014
Chr01_Cempo-Ireng	Chr01	Cempo-Ireng	XI	17345026	17345955	+	H	6	930
Chr01_Cempo-Ireng	Chr01	Cempo-Ireng	XI	17346441	17374636	+	H	6	28196
Chr01_Cempo-Ireng	Chr01	Cempo-Ireng	XI	17374802	17375733	+	H	6	932
Chr01_Cempo-Ireng	Chr01	Cempo-Ireng	XI	17375899	17377141	+	H	8	1243
Chr01_Cempo-Ireng	Chr01	Cempo-Ireng	XI	17378901	17379831	+	H	6	931
Chr01_Cempo-Ireng	Chr01	Cempo-Ireng	XI	17393040	17393970	+	H	6	931
Chr01_Cempo-Ireng	Chr01	Cempo-Ireng	XI	17396672	17397603	+	H	6	932
Chr01_Cempo-Ireng	Chr01	Cempo-Ireng	XI	17399519	17401378	+	H	12	1860
Chr01_Cempo-Ireng	Chr01	Cempo-Ireng	XI	17401544	17403096	+	H	10	1553
Chr01_Cempo-Ireng	Chr01	Cempo-Ireng	XI	17403893	17404826	+	H	6	934
Chr01_Cempo-Ireng	Chr01	Cempo-Ireng	XI	17404992	17406542	+	H	10	1551
Chr01_Cempo-Ireng	Chr01	Cempo-Ireng	XI	17406708	17408258	+	H	10	1551
Chr01_Cempo-Ireng	Chr01	Cempo-Ireng	XI	17409213	17410300	+	H	7	1088
Chr01_Cempo-Ireng	Chr01	Cempo-Ireng	XI	17410466	17412016	+	H	10	1551
Chr01_Cempo-Ireng	Chr01	Cempo-Ireng	XI	17412813	17413746	+	H	6	934
Chr01_Cempo-Ireng	Chr01	Cempo-Ireng	XI	17413912	17414999	+	H	7	1088
Chr01_Cempo-Ireng	Chr01	Cempo-Ireng	XI	17415165	17416715	+	H	10	1551
Chr01_Cempo-Ireng	Chr01	Cempo-Ireng	XI	17417512	17418445	+	H	6	934
Chr01_Cempo-Ireng	Chr01	Cempo-Ireng	XI	17418611	17420161	+	H	10	1551
Chr01_Cempo-Ireng	Chr01	Cempo-Ireng	XI	17421116	17422203	+	H	7	1088
Chr01_Cempo-Ireng	Chr01	Cempo-Ireng	XI	17422369	17423919	+	H	10	1551
Chr01_Cempo-Ireng	Chr01	Cempo-Ireng	XI	17424716	17427505	+	H	18	2790
Chr01_Cempo-Ireng	Chr01	Cempo-Ireng	XI	17428302	17430622	+	H	15	2321
Chr01_Cempo-Ireng	Chr01	Cempo-Ireng	XI	17431264	17433898	+	H	17	2635
Chr01_Cempo-Ireng	Chr01	Cempo-Ireng	XI	17434540	17437020	+	H	16	2481
Chr01_Cempo-Ireng	Chr01	Cempo-Ireng	XI	17437816	17438746	+	H	6	931
Chr01_Cempo-Ireng	Chr01	Cempo-Ireng	XI	17439542	17440937	+	H	9	1396
Chr01_Cempo-Ireng	Chr01	Cempo-Ireng	XI	17441578	17442663	+	H	7	1086
Chr01_Cempo-Ireng	Chr01	Cempo-Ireng	XI	17442829	17444844	+	H	13	2016
Chr01_Cempo-Ireng	Chr01	Cempo-Ireng	XI	17445486	17449361	+	H	25	3876
Chr01_Cempo-Ireng	Chr01	Cempo-Ireng	XI	17449527	17450457	+	H	6	931
Chr01_Cempo-Ireng	Chr01	Cempo-Ireng	XI	17450623	17451859	+	H	8	1237
Chr01_Cempo-Ireng	Chr01	Cempo-Ireng	XI	17452666	17453906	+	H	8	1241
Chr01_Cempo-Ireng	Chr01	Cempo-Ireng	XI	17454072	17454847	+	H	5	776
Chr01_Cempo-Ireng	Chr01	Cempo-Ireng	XI	17491667	17492561	+	H	6	895
Chr01_Cempo-Ireng	Chr01	Cempo-Ireng	XI	17494616	17495693	+	H	7	1078
Chr01_Cempo-Ireng	Chr01	Cempo-Ireng	XI	17500112	17501036	+	H	6	925
Chr01_Cempo-Ireng	Chr01	Cempo-Ireng	XI	17501202	17503051	+	H	12	1850
Chr01_Cempo-Ireng	Chr01	Cempo-Ireng	XI	17503217	17505221	+	H	13	2005
Chr01_Cempo-Ireng	Chr01	Cempo-Ireng	XI	17505386	17506778	+	H	9	1393
Chr01_Cempo-Ireng	Chr01	Cempo-Ireng	XI	17506944	17508793	+	H	12	1850
Chr01_Cempo-Ireng	Chr01	Cempo-Ireng	XI	17508958	17510659	+	H	11	1702
Chr01_Cempo-Ireng	Chr01	Cempo-Ireng	XI	17510824	17512216	+	H	9	1393
Chr01_Cempo-Ireng	Chr01	Cempo-Ireng	XI	17512382	17513458	+	H	7	1077
Chr01_Cempo-Ireng	Chr01	Cempo-Ireng	XI	17514102	17515801	+	H	11	1700
Chr01_Cempo-Ireng	Chr01	Cempo-Ireng	XI	17515967	17519369	+	H	22	3403
Chr01_Cempo-Ireng	Chr01	Cempo-Ireng	XI	17520952	17522961	+	H	13	2010
Chr01_Cempo-Ireng	Chr01	Cempo-Ireng	XI	17525955	17527032	+	H	7	1078
Chr01_Cempo-Ireng	Chr01	Cempo-Ireng	XI	17529247	17530171	+	H	6	925
Chr01_Cempo-Ireng	Chr01	Cempo-Ireng	XI	17530337	17532032	+	H	11	1696
Chr01_Cempo-Ireng	Chr01	Cempo-Ireng	XI	17532198	17534202	+	H	13	2005
Chr01_Cempo-Ireng	Chr01	Cempo-Ireng	XI	17534367	17535910	+	H	10	1544
Chr01_Cempo-Ireng	Chr01	Cempo-Ireng	XI	17536075	17537311	+	H	8	1237
Chr01_Cempo-Ireng	Chr01	Cempo-Ireng	XI	17537477	17538554	+	H	7	1078
Chr01_Cempo-Ireng	Chr01	Cempo-Ireng	XI	17540769	17541693	+	H	6	925
Chr01_Cempo-Ireng	Chr01	Cempo-Ireng	XI	17541859	17543554	+	H	11	1696
Chr01_Cempo-Ireng	Chr01	Cempo-Ireng	XI	17543720	17545724	+	H	13	2005
Chr01_Cempo-Ireng	Chr01	Cempo-Ireng	XI	17545889	17547432	+	H	10	1544
Chr01_Cempo-Ireng	Chr01	Cempo-Ireng	XI	17547597	17548989	+	H	9	1393
Chr01_Cempo-Ireng	Chr01	Cempo-Ireng	XI	17549155	17550231	+	H	7	1077
Chr01_Cempo-Ireng	Chr01	Cempo-Ireng	XI	17550874	17552573	+	H	11	1700
Chr01_Cempo-Ireng	Chr01	Cempo-Ireng	XI	17552739	17557379	+	H	30	4641
Chr01_Cempo-Ireng	Chr01	Cempo-Ireng	XI	17558020	17559869	+	H	12	1850
Chr01_Cempo-Ireng	Chr01	Cempo-Ireng	XI	17560035	17562039	+	H	13	2005
Chr01_Cempo-Ireng	Chr01	Cempo-Ireng	XI	17562204	17563596	+	H	9	1393
Chr01_Cempo-Ireng	Chr01	Cempo-Ireng	XI	17563762	17564838	+	H	7	1077
Chr01_Cempo-Ireng	Chr01	Cempo-Ireng	XI	17565482	17567181	+	H	11	1700
Chr01_Cempo-Ireng	Chr01	Cempo-Ireng	XI	17567347	17571677	+	H	28	4331
Chr01_Cempo-Ireng	Chr01	Cempo-Ireng	XI	17571843	17572920	+	H	7	1078
Chr01_Cempo-Ireng	Chr01	Cempo-Ireng	XI	17573086	17574163	+	H	7	1078
Chr01_Cempo-Ireng	Chr01	Cempo-Ireng	XI	17575279	17576666	+	H	9	1388
Chr01_Cempo-Ireng	Chr01	Cempo-Ireng	XI	17577451	17578533	+	H	7	1083
Chr01_Cempo-Ireng	Chr01	Cempo-Ireng	XI	17578699	17579781	+	H	7	1083
Chr01_Cempo-Ireng	Chr01	Cempo-Ireng	XI	17580267	17582418	+	H	14	2152
Chr01_Cempo-Ireng	Chr01	Cempo-Ireng	XI	17582585	17584740	+	H	14	2156
Chr01_Cempo-Ireng	Chr01	Cempo-Ireng	XI	17584907	17586141	+	H	8	1235
Chr01_Cempo-Ireng	Chr01	Cempo-Ireng	XI	17595665	17597049	+	H	9	1385
Chr01_Cempo-Ireng	Chr01	Cempo-Ireng	XI	17597535	17598305	+	H	5	771
Chr01_Cempo-Ireng	Chr01	Cempo-Ireng	XI	17598471	17599394	+	H	6	924
Chr01_Cempo-Ireng	Chr01	Cempo-Ireng	XI	17599560	17600789	+	H	8	1230
Chr01_Cempo-Ireng	Chr01	Cempo-Ireng	XI	17600955	17602189	+	H	8	1235
Chr01_Cempo-Ireng	Chr01	Cempo-Ireng	XI	17703528	17704295	+	H	5	768
Chr01_Cempo-Ireng	Chr01	Cempo-Ireng	XI	17704936	17705709	+	H	5	774
Chr01_CW01	Chr01	CW01	Oruf	18438890	18439816	-	H	6	927
Chr01_CW01	Chr01	CW01	Oruf	18462366	18476386	+	H	6	14021
Chr01_CW01	Chr01	CW01	Oruf	18520228	18521001	-	H	5	774
Chr01_CW01	Chr01	CW01	Oruf	18521167	18521940	-	H	5	774
Chr01_CW01	Chr01	CW01	Oruf	18551972	18552901	+	H	6	930
Chr01_CW01	Chr01	CW01	Oruf	18553387	18555093	+	H	11	1707
Chr01_CW01	Chr01	CW01	Oruf	18557319	18558248	+	H	6	930
Chr01_CW01	Chr01	CW01	Oruf	18558734	18561215	+	H	16	2482
Chr01_CW01	Chr01	CW01	Oruf	18571883	18572813	+	H	6	931
Chr01_CW01	Chr01	CW01	Oruf	18574709	18575950	+	H	8	1242
Chr01_CW01	Chr01	CW01	Oruf	18578971	18579902	+	H	6	932
Chr01_CW01	Chr01	CW01	Oruf	18584988	18593300	+	H	51	8313
Chr01_CW01	Chr01	CW01	Oruf	18593786	18595592	+	H	11	1807
Chr01_CW01	Chr01	CW01	Oruf	18598298	18600259	+	H	12	1962
Chr01_CW01	Chr01	CW01	Oruf	18604390	18606351	+	H	12	1962
Chr01_CW01	Chr01	CW01	Oruf	18609057	18611328	+	H	14	2272
Chr01_CW01	Chr01	CW01	Oruf	18616396	18617892	+	H	9	1497
Chr01_CW01	Chr01	CW01	Oruf	18618378	18619821	+	H	8	1444
Chr01_CW01	Chr01	CW01	Oruf	18629931	18631015	+	H	7	1085
Chr01_CW01	Chr01	CW01	Oruf	18635756	18636840	+	H	7	1085
Chr01_CW01	Chr01	CW01	Oruf	18653353	18654127	+	H	5	775
Chr01_CW01	Chr01	CW01	Oruf	18655398	18656171	+	H	5	774
Chr01_CW01	Chr01	CW01	Oruf	18661542	18662316	+	H	5	775
Chr01_CW01	Chr01	CW01	Oruf	18665476	18666250	+	H	5	775
Chr01_CW01	Chr01	CW01	Oruf	18669255	18670029	+	H	5	775
Chr01_CW01	Chr01	CW01	Oruf	18673034	18673808	+	H	5	775
Chr01_CW01	Chr01	CW01	Oruf	18673974	18674747	+	H	5	774
Chr01_CW01	Chr01	CW01	Oruf	18693847	18694815	+	D	6	969
Chr01_CW01	Chr01	CW01	Oruf	18696601	18697569	+	D	6	969
Chr01_CW01	Chr01	CW01	Oruf	18699355	18711785	+	D	13	12431
Chr01_CW01	Chr01	CW01	Oruf	18720903	18763204	+	D	221	42302
Chr01_CW01	Chr01	CW01	Oruf	18763505	18764653	+	D	7	1149
Chr01_CW01	Chr01	CW01	Oruf	18764954	18766102	+	D	7	1149
Chr01_CW01	Chr01	CW01	Oruf	18766403	18768160	+	D	7	1758
Chr01_CW01	Chr01	CW01	Oruf	18768461	18770218	+	D	7	1758
Chr01_CW01	Chr01	CW01	Oruf	18770519	18771667	+	D	7	1149
Chr01_CW01	Chr01	CW01	Oruf	18771968	18773116	+	D	7	1149
Chr01_CW01	Chr01	CW01	Oruf	18773252	18774080	+	D	5	829
Chr01_CW01	Chr01	CW01	Oruf	18777233	18794943	+	D	36	17711
Chr01_CW01	Chr01	CW01	Oruf	18873053	18874048	+	D	6	996
Chr01_CW01	Chr01	CW01	Oruf	18877791	18879705	+	D	5	1915
Chr01_CW01	Chr01	CW01	Oruf	18880397	18895649	+	D	92	15253
Chr01_CW01	Chr01	CW01	Oruf	18896169	18897665	+	D	9	1497
Chr01_CW01	Chr01	CW01	Oruf	18897831	18898825	+	D	6	995
Chr01_CW01	Chr01	CW01	Oruf	18898991	18901482	+	D	15	2492
Chr01_CW01	Chr01	CW01	Oruf	18901648	18902642	+	D	6	995
Chr01_CW01	Chr01	CW01	Oruf	18902808	18905958	+	D	19	3151
Chr01_CW01	Chr01	CW01	Oruf	18906279	18908933	+	D	16	2655
Chr01_CW01	Chr01	CW01	Oruf	18938578	18939812	-	H	8	1235
Chr01_CW03	Chr01	CW03	Oruf	17545979	17546780	-	E	5	802
Chr01_CW03	Chr01	CW03	Oruf	17549302	17550105	-	E	5	804
Chr01_CW03	Chr01	CW03	Oruf	17550569	17551372	-	E	5	804
Chr01_CW03	Chr01	CW03	Oruf	17553205	17554006	-	E	5	802
Chr01_CW03	Chr01	CW03	Oruf	17556848	17557617	-	H	5	770
Chr01_CW03	Chr01	CW03	Oruf	17558385	17559189	-	E	5	805
Chr01_CW03	Chr01	CW03	Oruf	17559818	17560622	-	E	5	805
Chr01_CW03	Chr01	CW03	Oruf	17562618	17563742	-	E	7	1125
Chr01_CW03	Chr01	CW03	Oruf	17622015	17623003	-	D	6	989
Chr01_CW03	Chr01	CW03	Oruf	17623169	17624157	-	D	6	989
Chr01_CW03	Chr01	CW03	Oruf	17625644	17627286	-	D	10	1643
Chr01_CW03	Chr01	CW03	Oruf	17628111	17629594	-	D	9	1484
Chr01_CW03	Chr01	CW03	Oruf	17630255	17631244	-	D	6	990
Chr01_CW03	Chr01	CW03	Oruf	17632896	17633720	-	D	5	825
Chr01_CW03	Chr01	CW03	Oruf	17636688	17637511	-	D	5	824
Chr01_CW03	Chr01	CW03	Oruf	17640316	17641634	-	D	8	1319
Chr01_CW03	Chr01	CW03	Oruf	17652200	17653189	-	D	6	990
Chr01_CW03	Chr01	CW03	Oruf	17653685	17655168	-	D	9	1484
Chr01_CW03	Chr01	CW03	Oruf	17655664	17656487	-	D	5	824
Chr01_CW03	Chr01	CW03	Oruf	17666216	17667039	-	D	5	824
Chr01_CW03	Chr01	CW03	Oruf	17667698	17669181	-	D	9	1484
Chr01_CW03	Chr01	CW03	Oruf	17672644	17673633	-	D	6	990
Chr01_CW03	Chr01	CW03	Oruf	17673799	17674623	-	D	5	825
Chr01_CW03	Chr01	CW03	Oruf	17675119	17676933	-	D	11	1815
Chr01_CW03	Chr01	CW03	Oruf	17677924	17679243	-	D	8	1320
Chr01_CW03	Chr01	CW03	Oruf	17679409	17680233	-	D	5	825
Chr01_CW03	Chr01	CW03	Oruf	17680729	17681883	-	D	7	1155
Chr01_CW03	Chr01	CW03	Oruf	17683369	17684358	-	D	6	990
Chr01_CW03	Chr01	CW03	Oruf	17686834	17688153	-	D	8	1320
Chr01_CW03	Chr01	CW03	Oruf	17691781	17693430	-	D	10	1650
Chr01_CW03	Chr01	CW03	Oruf	17707722	17708690	-	E	6	969
Chr01_CW03	Chr01	CW03	Oruf	17731837	17732651	-	E	5	815
Chr01_CW03	Chr01	CW03	Oruf	17733115	17733929	-	E	5	815
Chr01_CW03	Chr01	CW03	Oruf	17740473	17741287	-	E	5	815
Chr01_CW03	Chr01	CW03	Oruf	17741751	17742565	-	E	5	815
Chr01_CW03	Chr01	CW03	Oruf	17744283	17745096	-	E	5	814
Chr01_CW03	Chr01	CW03	Oruf	17750054	17751032	-	E	6	979
Chr01_CW03	Chr01	CW03	Oruf	17751496	17752464	-	E	6	969
Chr01_CW03	Chr01	CW03	Oruf	17753720	17754853	-	E	7	1134
Chr01_CW03	Chr01	CW03	Oruf	17756109	17756923	-	E	5	815
Chr01_CW03	Chr01	CW03	Oruf	17758468	17759260	-	E	5	793
Chr01_CW03	Chr01	CW03	Oruf	17766246	17767060	-	E	5	815
Chr01_CW03	Chr01	CW03	Oruf	17799427	17800395	-	E	6	969
Chr01_CW03	Chr01	CW03	Oruf	17800985	17801953	-	E	6	969
Chr01_CW03	Chr01	CW03	Oruf	17806181	17806997	-	E	5	817
Chr01_CW03	Chr01	CW03	Oruf	17810875	17811691	-	E	5	817
Chr01_CW03	Chr01	CW03	Oruf	17820838	17821984	-	E	7	1147
Chr01_CW03	Chr01	CW03	Oruf	17828474	17829445	-	E	6	972
Chr01_CW03	Chr01	CW03	Oruf	17831359	17832483	-	E	7	1125
Chr01_CW03	Chr01	CW03	Oruf	17832609	17833867	-	E	8	1259
Chr01_CW03	Chr01	CW03	Oruf	17836497	17839078	-	E	16	2582
Chr01_CW03	Chr01	CW03	Oruf	17839270	17840086	-	E	5	817
Chr01_CW03	Chr01	CW03	Oruf	17840239	17841365	-	E	7	1127
Chr01_CW03	Chr01	CW03	Oruf	17843052	17844321	-	E	8	1270
Chr01_CW03	Chr01	CW03	Oruf	17845199	17845973	-	E	5	775
Chr01_CW03	Chr01	CW03	Oruf	17846829	17848098	-	E	8	1270
Chr01_CW03	Chr01	CW03	Oruf	17848976	17850069	-	E	7	1094
Chr01_CW03	Chr01	CW03	Oruf	17851669	17852938	-	E	8	1270
Chr01_CW03	Chr01	CW03	Oruf	17854549	17855344	-	E	5	796
Chr01_CW03	Chr01	CW03	Oruf	17856200	17856995	-	E	5	796
Chr01_CW03	Chr01	CW03	Oruf	17882281	17887089	-	E	30	4809
Chr01_CW03	Chr01	CW03	Oruf	17887226	17994215	-	E	665	106990
Chr01_CW03	Chr01	CW03	Oruf	17994636	18000786	-	E	38	6151
Chr01_CW03	Chr01	CW03	Oruf	18001207	18002023	-	E	5	817
Chr01_CW03	Chr01	CW03	Oruf	18002444	18005859	-	E	21	3416
Chr01_CW03	Chr01	CW03	Oruf	18006280	18052378	-	E	288	46099
Chr01_CW03	Chr01	CW03	Oruf	18052799	18063184	-	E	65	10386
Chr01_CW03	Chr01	CW03	Oruf	18064687	18069079	-	E	27	4393
Chr01_CW03	Chr01	CW03	Oruf	18069500	18070811	-	E	8	1312
Chr01_CW03	Chr01	CW03	Oruf	18071232	18073316	-	E	13	2085
Chr01_CW03	Chr01	CW03	Oruf	18073472	18074596	-	E	7	1125
Chr01_CW03	Chr01	CW03	Oruf	18074752	18075876	-	E	7	1125
Chr01_CW03	Chr01	CW03	Oruf	18076032	18076991	-	E	6	960
Chr01_CW03	Chr01	CW03	Oruf	18077147	18091060	-	E	87	13914
Chr01_CW03	Chr01	CW03	Oruf	18091481	18155817	-	E	402	64337
Chr01_CW03	Chr01	CW03	Oruf	18157689	18164254	-	E	41	6566
Chr01_CW03	Chr01	CW03	Oruf	18167527	18176178	-	E	54	8652
Chr01_CW03	Chr01	CW03	Oruf	18181185	18182011	-	E	5	827
Chr01_CW03	Chr01	CW03	Oruf	18185000	18186622	-	E	10	1623
Chr01_CW03	Chr01	CW03	Oruf	18187480	18190183	-	E	17	2704
Chr01_CW03	Chr01	CW03	Oruf	18190647	18194638	-	E	25	3992
Chr01_CW03	Chr01	CW03	Oruf	18195102	18199095	-	E	25	3994
Chr01_CW03	Chr01	CW03	Oruf	18200496	18201455	-	E	6	960
Chr01_CW03	Chr01	CW03	Oruf	18201918	18202877	-	E	6	960
Chr01_CW03	Chr01	CW03	Oruf	18203340	18205423	-	E	13	2084
Chr01_CW03	Chr01	CW03	Oruf	18205886	18207166	-	E	8	1281
Chr01_CW03	Chr01	CW03	Oruf	18207629	18208908	-	E	8	1280
Chr01_CW03	Chr01	CW03	Oruf	18209371	18211291	-	E	12	1921
Chr01_CW03	Chr01	CW03	Oruf	18212565	18213534	-	E	6	970
Chr01_CW03	Chr01	CW03	Oruf	18215242	18218149	-	E	18	2908
Chr01_CW03	Chr01	CW03	Oruf	18220049	18221018	-	E	6	970
Chr01_CW03	Chr01	CW03	Oruf	18222726	18241322	-	E	115	18597
Chr01_CW03	Chr01	CW03	Oruf	18241743	18242879	-	E	7	1137
Chr01_CW03	Chr01	CW03	Oruf	18243300	18244591	-	E	8	1292
Chr01_CW03	Chr01	CW03	Oruf	18244714	18245829	-	E	7	1116
Chr01_CW03	Chr01	CW03	Oruf	18246250	18247066	-	E	5	817
Chr01_CW03	Chr01	CW03	Oruf	18247487	18248623	-	E	7	1137
Chr01_CW03	Chr01	CW03	Oruf	18249044	18249860	-	E	5	817
Chr01_CW03	Chr01	CW03	Oruf	18250281	18251417	-	E	7	1137
Chr01_CW03	Chr01	CW03	Oruf	18251838	18252654	-	E	5	817
Chr01_CW03	Chr01	CW03	Oruf	18253075	18253891	-	E	5	817
Chr01_CW03	Chr01	CW03	Oruf	18254312	18255448	-	E	7	1137
Chr01_CW03	Chr01	CW03	Oruf	18255869	18257645	-	E	11	1777
Chr01_CW03	Chr01	CW03	Oruf	18258066	18260162	-	E	13	2097
Chr01_CW03	Chr01	CW03	Oruf	18260583	18262999	-	E	15	2417
Chr01_CW03	Chr01	CW03	Oruf	18263420	18265836	-	E	15	2417
Chr01_CW03	Chr01	CW03	Oruf	18266257	18267073	-	E	5	817
Chr01_CW03	Chr01	CW03	Oruf	18267494	18269280	-	E	11	1787
Chr01_CW03	Chr01	CW03	Oruf	18269701	18273261	-	E	22	3561
Chr01_CW03	Chr01	CW03	Oruf	18273682	18275624	-	E	12	1943
Chr01_CW03	Chr01	CW03	Oruf	18276454	18277253	-	E	5	800
Chr01_CW03	Chr01	CW03	Oruf	18277717	18278520	-	E	5	804
Chr01_CW03	Chr01	CW03	Oruf	18278984	18279787	-	E	5	804
Chr01_CW03	Chr01	CW03	Oruf	18283821	18284789	-	E	6	969
Chr01_CW03	Chr01	CW03	Oruf	18285253	18287181	-	E	12	1929
Chr01_CW03	Chr01	CW03	Oruf	18287632	18291308	-	E	23	3677
Chr01_CW03	Chr01	CW03	Oruf	18297109	18298099	-	E	6	991
Chr01_CW03	Chr01	CW03	Oruf	18303122	18304105	+	E	6	984
Chr01_CW03	Chr01	CW03	Oruf	18304564	18305547	+	E	6	984
Chr01_CW03	Chr01	CW03	Oruf	18305548	18307391	+	H	12	1844
Chr01_CW03	Chr01	CW03	Oruf	18307866	18309097	+	H	8	1232
Chr01_CW03	Chr01	CW03	Oruf	18311133	18312122	+	E	6	990
Chr01_CW03	Chr01	CW03	Oruf	18312895	18313664	+	H	5	770
Chr01_CW03	Chr01	CW03	Oruf	18314159	18315084	+	H	6	926
Chr01_CW03	Chr01	CW03	Oruf	18315579	18316350	+	H	5	772
Chr01_CW03	Chr01	CW03	Oruf	18316670	18317494	+	E	5	825
Chr01_CW03	Chr01	CW03	Oruf	18318267	18319036	+	H	5	770
Chr01_CW03	Chr01	CW03	Oruf	18319522	18320600	+	H	7	1079
Chr01_CW03	Chr01	CW03	Oruf	18321086	18322781	+	H	11	1696
Chr01_CW03	Chr01	CW03	Oruf	18322947	18323715	+	H	5	769
Chr01_CW03	Chr01	CW03	Oruf	18323881	18325576	+	H	11	1696
Chr01_CW03	Chr01	CW03	Oruf	18335029	18335798	+	H	5	770
Chr01_CW03	Chr01	CW03	Oruf	18337086	18337910	+	E	5	825
Chr01_CW03	Chr01	CW03	Oruf	18340918	18341742	+	E	5	825
Chr01_CW03	Chr01	CW03	Oruf	18346039	18346863	+	E	5	825
Chr01_CW03	Chr01	CW03	Oruf	18469418	18470193	+	H	5	776
Chr01_CW03	Chr01	CW03	Oruf	18470349	18471279	+	H	6	931
Chr01_CW03	Chr01	CW03	Oruf	18483682	18484612	+	H	6	931
Chr01_CW03	Chr01	CW03	Oruf	18488508	18489567	+	H	7	1060
Chr01_CW06	Chr01	CW06	Oruf	17443103	17444392	-	J	8	1290
Chr01_CW06	Chr01	CW06	Oruf	17502478	17503467	-	E	6	990
Chr01_CW06	Chr01	CW06	Oruf	17530133	17530902	-	H	5	770
Chr01_CW06	Chr01	CW06	Oruf	17531387	17532158	-	H	5	772
Chr01_CW06	Chr01	CW06	Oruf	17552493	17553974	-	E	9	1482
Chr01_CW06	Chr01	CW06	Oruf	17565779	17569654	+	H	25	3876
Chr01_CW06	Chr01	CW06	Oruf	17576719	17578264	+	H	10	1546
Chr01_CW06	Chr01	CW06	Oruf	17578750	17579831	+	H	7	1082
Chr01_CW06	Chr01	CW06	Oruf	17579996	17581080	+	H	7	1085
Chr01_CW06	Chr01	CW06	Oruf	17581876	17582648	+	H	5	773
Chr01_CW06	Chr01	CW06	Oruf	17582814	17584050	+	H	8	1237
Chr01_CW06	Chr01	CW06	Oruf	17596556	17597542	-	E	6	987
Chr01_CW06	Chr01	CW06	Oruf	17626294	17629759	-	E	21	3466
Chr01_CW06	Chr01	CW06	Oruf	17655796	17657442	-	E	10	1647
Chr01_CW06	Chr01	CW06	Oruf	17658553	17659372	-	E	5	820
Chr01_CW06	Chr01	CW06	Oruf	17665881	17666815	-	E	5	935
Chr01_CW06	Chr01	CW06	Oruf	17736475	17737401	-	H	6	927
Chr01_CW06	Chr01	CW06	Oruf	17738356	17739273	-	H	6	918
Chr01_CW06	Chr01	CW06	Oruf	17739436	17740507	-	H	7	1072
Chr01_CW06	Chr01	CW06	Oruf	17742900	17743719	-	E	5	820
Chr01_CW06	Chr01	CW06	Oruf	17744850	17745992	-	E	7	1143
Chr01_CW06	Chr01	CW06	Oruf	17750137	17751291	-	E	7	1155
Chr01_CW06	Chr01	CW06	Oruf	17756705	17757470	-	H	5	766
Chr01_CW06	Chr01	CW06	Oruf	17757968	17759039	-	H	7	1072
Chr01_CW06	Chr01	CW06	Oruf	17759537	17764668	-	H	5	5132
Chr01_CW06	Chr01	CW06	Oruf	17785830	17786642	-	E	5	813
Chr01_CW06	Chr01	CW06	Oruf	17787282	17788054	-	H	5	773
Chr01_CW06	Chr01	CW06	Oruf	17797098	17797904	-	E	5	807
Chr01_CW06	Chr01	CW06	Oruf	17802102	17802927	-	E	5	826
Chr01_CW06	Chr01	CW06	Oruf	17839936	17840866	+	H	6	931
Chr01_CW06	Chr01	CW06	Oruf	17843915	17844845	+	H	6	931
Chr01_CW06	Chr01	CW06	Oruf	17846625	17847400	+	H	5	776
Chr01_CW06	Chr01	CW06	Oruf	17849180	17849955	+	H	5	776
Chr01_CW06	Chr01	CW06	Oruf	17850919	17852932	+	H	13	2014
Chr01_CW06	Chr01	CW06	Oruf	17854385	17855314	+	H	6	930
Chr01_CW06	Chr01	CW06	Oruf	17855800	17883995	+	H	5	28196
Chr01_CW06	Chr01	CW06	Oruf	17884161	17885092	+	H	6	932
Chr01_CW06	Chr01	CW06	Oruf	17885258	17886656	+	H	9	1399
Chr01_CW06	Chr01	CW06	Oruf	17890000	17890931	+	H	6	932
Chr01_CW06	Chr01	CW06	Oruf	17893633	17894564	+	H	6	932
Chr01_CW06	Chr01	CW06	Oruf	17897435	17898829	+	H	9	1395
Chr01_CW06	Chr01	CW06	Oruf	17899626	17900560	+	H	6	935
Chr01_CW06	Chr01	CW06	Oruf	17900725	17901659	+	H	6	935
Chr01_CW06	Chr01	CW06	Oruf	17901824	17902758	+	H	6	935
Chr01_CW06	Chr01	CW06	Oruf	17902923	17909831	+	H	16	6909
Chr01_CW06	Chr01	CW06	Oruf	17910628	17911561	+	H	6	934
Chr01_CW06	Chr01	CW06	Oruf	17911727	17913277	+	H	10	1551
Chr01_CW06	Chr01	CW06	Oruf	17914232	17915319	+	H	7	1088
Chr01_CW06	Chr01	CW06	Oruf	17915485	17917035	+	H	10	1551
Chr01_CW06	Chr01	CW06	Oruf	17917832	17918765	+	H	6	934
Chr01_CW06	Chr01	CW06	Oruf	17918931	17920481	+	H	10	1551
Chr01_CW06	Chr01	CW06	Oruf	17921436	17922523	+	H	7	1088
Chr01_CW06	Chr01	CW06	Oruf	17922689	17924239	+	H	10	1551
Chr01_CW06	Chr01	CW06	Oruf	17925036	17927047	+	H	13	2012
Chr01_CW06	Chr01	CW06	Oruf	17927844	17930009	+	H	14	2166
Chr01_CW06	Chr01	CW06	Oruf	17930806	17933126	+	H	15	2321
Chr01_CW06	Chr01	CW06	Oruf	17933768	17936402	+	H	17	2635
Chr01_CW06	Chr01	CW06	Oruf	17937044	17940144	+	H	20	3101
Chr01_CW06	Chr01	CW06	Oruf	17940940	17943265	+	H	15	2326
Chr01_CW06	Chr01	CW06	Oruf	17943906	17945921	+	H	13	2016
Chr01_CW06	Chr01	CW06	Oruf	17946563	17950438	+	H	25	3876
Chr01_CW06	Chr01	CW06	Oruf	17950604	17951534	+	H	6	931
Chr01_CW06	Chr01	CW06	Oruf	17951700	17952936	+	H	8	1237
Chr01_CW06	Chr01	CW06	Oruf	17953743	17954828	+	H	7	1086
Chr01_CW06	Chr01	CW06	Oruf	17954994	17955769	+	H	5	776
Chr01_CW06	Chr01	CW06	Oruf	17957046	17957970	+	H	6	925
Chr01_CW06	Chr01	CW06	Oruf	17958609	17960149	+	H	10	1541
Chr01_CW06	Chr01	CW06	Oruf	17960314	17961547	+	H	8	1234
Chr01_CW06	Chr01	CW06	Oruf	17961711	17962635	+	H	6	925
Chr01_CW06	Chr01	CW06	Oruf	17963595	17965271	+	H	11	1677
Chr01_CW06	Chr01	CW06	Oruf	17966064	17967126	+	H	7	1063
Chr01_CW06	Chr01	CW06	Oruf	18020653	18021547	+	H	6	895
Chr01_CW06	Chr01	CW06	Oruf	18025017	18026094	+	H	7	1078
Chr01_CW06	Chr01	CW06	Oruf	18026735	18027507	+	H	5	773
Chr01_CW06	Chr01	CW06	Oruf	18027673	18029216	+	H	10	1544
Chr01_CW06	Chr01	CW06	Oruf	18031276	18032664	+	H	9	1389
Chr01_CW06	Chr01	CW06	Oruf	18034879	18036419	+	H	10	1541
Chr01_CW06	Chr01	CW06	Oruf	18036584	18037976	+	H	9	1393
Chr01_CW06	Chr01	CW06	Oruf	18038142	18039218	+	H	7	1077
Chr01_CW06	Chr01	CW06	Oruf	18039862	18041561	+	H	11	1700
Chr01_CW06	Chr01	CW06	Oruf	18041727	18046212	+	H	29	4486
Chr01_CW06	Chr01	CW06	Oruf	18046378	18047455	+	H	7	1078
Chr01_CW06	Chr01	CW06	Oruf	18048571	18049958	+	H	9	1388
Chr01_CW06	Chr01	CW06	Oruf	18051693	18053547	+	H	12	1855
Chr01_CW06	Chr01	CW06	Oruf	18053713	18054795	+	H	7	1083
Chr01_CW06	Chr01	CW06	Oruf	18055281	18056664	+	H	9	1384
Chr01_CW06	Chr01	CW06	Oruf	18057620	18059775	+	H	14	2156
Chr01_CW06	Chr01	CW06	Oruf	18059942	18061176	+	H	8	1235
Chr01_CW06	Chr01	CW06	Oruf	18081679	18082433	+	H	5	755
Chr01_CW06	Chr01	CW06	Oruf	18084158	18084912	+	H	5	755
Chr01_CW06	Chr01	CW06	Oruf	18206189	18206956	+	H	5	768
Chr01_CW06	Chr01	CW06	Oruf	18207597	18208370	+	H	5	774
Chr01_CW07	Chr01	CW07	Oruf	17845332	17859351	+	H	6	14020
Chr01_CW07	Chr01	CW07	Oruf	17902983	17903756	-	H	5	774
Chr01_CW07	Chr01	CW07	Oruf	17903922	17904695	-	H	5	774
Chr01_CW07	Chr01	CW07	Oruf	17934725	17935809	+	H	7	1085
Chr01_CW07	Chr01	CW07	Oruf	17936295	17937381	+	H	7	1087
Chr01_CW07	Chr01	CW07	Oruf	17937545	17940336	+	H	18	2792
Chr01_CW07	Chr01	CW07	Oruf	17950376	17951616	+	H	8	1241
Chr01_CW07	Chr01	CW07	Oruf	17952895	17955011	+	H	13	2117
Chr01_CW07	Chr01	CW07	Oruf	17957859	17958635	+	H	5	777
Chr01_CW07	Chr01	CW07	Oruf	17960386	17962245	+	H	12	1860
Chr01_CW07	Chr01	CW07	Oruf	17962411	17963340	+	H	6	930
Chr01_CW07	Chr01	CW07	Oruf	17965716	17966492	+	H	5	777
Chr01_CW07	Chr01	CW07	Oruf	17981649	17982423	+	H	5	775
Chr01_CW07	Chr01	CW07	Oruf	17993649	17994423	+	H	5	775
Chr01_CW07	Chr01	CW07	Oruf	17999009	17999938	+	H	6	930
Chr01_CW07	Chr01	CW07	Oruf	18001054	18002138	+	H	7	1085
Chr01_CW07	Chr01	CW07	Oruf	18003409	18004338	+	H	6	930
Chr01_CW07	Chr01	CW07	Oruf	18005454	18006538	+	H	7	1085
Chr01_CW07	Chr01	CW07	Oruf	18008284	18009368	+	H	7	1085
Chr01_CW07	Chr01	CW07	Oruf	18010639	18011723	+	H	7	1085
Chr01_CW07	Chr01	CW07	Oruf	18013314	18014088	+	H	5	775
Chr01_CW07	Chr01	CW07	Oruf	18015204	18015979	+	H	5	776
Chr01_CW07	Chr01	CW07	Oruf	18025614	18026388	+	H	5	775
Chr01_CW07	Chr01	CW07	Oruf	18043241	18044015	+	H	5	775
Chr01_CW07	Chr01	CW07	Oruf	18044181	18044955	+	H	5	775
Chr01_CW07	Chr01	CW07	Oruf	18049376	18050150	+	H	5	775
Chr01_CW07	Chr01	CW07	Oruf	18050791	18051565	+	H	5	775
Chr01_CW07	Chr01	CW07	Oruf	18059156	18059930	+	H	5	775
Chr01_CW07	Chr01	CW07	Oruf	18063411	18064185	+	H	5	775
Chr01_CW07	Chr01	CW07	Oruf	18068926	18069700	+	H	5	775
Chr01_CW07	Chr01	CW07	Oruf	18071921	18072695	+	H	5	775
Chr01_CW07	Chr01	CW07	Oruf	18073181	18074265	+	H	7	1085
Chr01_CW07	Chr01	CW07	Oruf	18074751	18075525	+	H	5	775
Chr01_CW07	Chr01	CW07	Oruf	18077591	18078365	+	H	5	775
Chr01_CW07	Chr01	CW07	Oruf	18078851	18079625	+	H	5	775
Chr01_CW07	Chr01	CW07	Oruf	18080741	18081515	+	H	5	775
Chr01_CW07	Chr01	CW07	Oruf	18087490	18088264	+	H	5	775
Chr01_CW07	Chr01	CW07	Oruf	18090330	18091104	+	H	5	775
Chr01_CW07	Chr01	CW07	Oruf	18091590	18092364	+	H	5	775
Chr01_CW07	Chr01	CW07	Oruf	18093480	18094254	+	H	5	775
Chr01_CW07	Chr01	CW07	Oruf	18099160	18100089	+	H	6	930
Chr01_CW07	Chr01	CW07	Oruf	18104210	18105139	+	H	6	930
Chr01_CW07	Chr01	CW07	Oruf	18113205	18113979	+	H	5	775
Chr01_CW07	Chr01	CW07	Oruf	18114940	18115869	+	H	6	930
Chr01_CW07	Chr01	CW07	Oruf	18125547	18126321	+	H	5	775
Chr01_CW07	Chr01	CW07	Oruf	18127282	18128211	+	H	6	930
Chr01_CW07	Chr01	CW07	Oruf	18130309	18131083	+	H	5	775
Chr01_CW07	Chr01	CW07	Oruf	18132519	18133758	+	H	8	1240
Chr01_CW07	Chr01	CW07	Oruf	18134874	18135803	+	H	6	930
Chr01_CW07	Chr01	CW07	Oruf	18135969	18136743	+	H	5	775
Chr01_CW07	Chr01	CW07	Oruf	18136909	18137683	+	H	5	775
Chr01_CW07	Chr01	CW07	Oruf	18139749	18140678	+	H	6	930
Chr01_CW07	Chr01	CW07	Oruf	18142743	18143517	+	H	5	775
Chr01_CW07	Chr01	CW07	Oruf	18145418	18146192	+	H	5	775
Chr01_CW07	Chr01	CW07	Oruf	18148093	18148867	+	H	5	775
Chr01_CW07	Chr01	CW07	Oruf	18149033	18150892	+	H	12	1860
Chr01_CW07	Chr01	CW07	Oruf	18151843	18153393	+	H	10	1551
Chr01_CW07	Chr01	CW07	Oruf	18154034	18156048	+	H	13	2015
Chr01_CW07	Chr01	CW07	Oruf	18156214	18156988	+	H	5	775
Chr01_CW07	Chr01	CW07	Oruf	18157949	18158878	+	H	6	930
Chr01_CW07	Chr01	CW07	Oruf	18159044	18160283	+	H	8	1240
Chr01_CW07	Chr01	CW07	Oruf	18160614	18161543	+	H	6	930
Chr01_CW07	Chr01	CW07	Oruf	18161709	18162483	+	H	5	775
Chr01_CW07	Chr01	CW07	Oruf	18164229	18165003	+	H	5	775
Chr01_CW07	Chr01	CW07	Oruf	18166749	18168298	+	H	10	1550
Chr01_CW07	Chr01	CW07	Oruf	18169414	18170963	+	H	10	1550
Chr01_CW07	Chr01	CW07	Oruf	18172234	18173008	+	H	5	775
Chr01_CW07	Chr01	CW07	Oruf	18176809	18177583	+	H	5	775
Chr01_CW07	Chr01	CW07	Oruf	18180754	18181528	+	H	5	775
Chr01_CW07	Chr01	CW07	Oruf	18188179	18188953	+	H	5	775
Chr01_CW07	Chr01	CW07	Oruf	18191495	18192269	+	H	5	775
Chr01_CW07	Chr01	CW07	Oruf	18194336	18195110	+	H	5	775
Chr01_CW07	Chr01	CW07	Oruf	18201606	18202972	+	H	9	1367
Chr01_CW07	Chr01	CW07	Oruf	18204561	18205492	+	H	6	932
Chr01_CW07	Chr01	CW07	Oruf	18208950	18209724	+	H	5	775
Chr01_CW07	Chr01	CW07	Oruf	18211604	18212380	+	H	5	777
Chr01_CW07	Chr01	CW07	Oruf	18215838	18216612	+	H	5	775
Chr01_CW07	Chr01	CW07	Oruf	18219731	18220505	+	H	5	775
Chr01_CW07	Chr01	CW07	Oruf	18222385	18223159	+	H	5	775
Chr01_CW07	Chr01	CW07	Oruf	18225359	18227810	+	H	16	2452
Chr01_CW07	Chr01	CW07	Oruf	18228769	18229543	+	H	5	775
Chr01_CW07	Chr01	CW07	Oruf	18230318	18231092	+	H	5	775
Chr01_CW07	Chr01	CW07	Oruf	18232043	18233282	+	H	8	1240
Chr01_CW07	Chr01	CW07	Oruf	18234398	18235172	+	H	5	775
Chr01_CW07	Chr01	CW07	Oruf	18236866	18237640	+	H	5	775
Chr01_CW07	Chr01	CW07	Oruf	18238911	18240770	+	H	12	1860
Chr01_CW07	Chr01	CW07	Oruf	18242041	18242815	+	H	5	775
Chr01_CW07	Chr01	CW07	Oruf	18243590	18244364	+	H	5	775
Chr01_CW07	Chr01	CW07	Oruf	18247525	18248299	+	H	5	775
Chr01_CW07	Chr01	CW07	Oruf	18251119	18251893	+	H	5	775
Chr01_CW07	Chr01	CW07	Oruf	18253928	18254702	+	H	5	775
Chr01_CW07	Chr01	CW07	Oruf	18257388	18258162	+	H	5	775
Chr01_CW07	Chr01	CW07	Oruf	18261478	18262252	+	H	5	775
Chr01_CW07	Chr01	CW07	Oruf	18267138	18267912	+	H	5	775
Chr01_CW07	Chr01	CW07	Oruf	18268708	18269482	+	H	5	775
Chr01_CW07	Chr01	CW07	Oruf	18271693	18272467	+	H	5	775
Chr01_CW07	Chr01	CW07	Oruf	18274678	18275452	+	H	5	775
Chr01_CW07	Chr01	CW07	Oruf	18275618	18276392	+	H	5	775
Chr01_CW07	Chr01	CW07	Oruf	18280018	18280792	+	H	5	775
Chr01_CW07	Chr01	CW07	Oruf	18280958	18281732	+	H	5	775
Chr01_CW07	Chr01	CW07	Oruf	18281898	18282672	+	H	5	775
Chr01_CW07	Chr01	CW07	Oruf	18283468	18284242	+	H	5	775
Chr01_CW07	Chr01	CW07	Oruf	18284408	18285182	+	H	5	775
Chr01_CW07	Chr01	CW07	Oruf	18285348	18286432	+	H	7	1085
Chr01_CW07	Chr01	CW07	Oruf	18288157	18289086	+	H	6	930
Chr01_CW07	Chr01	CW07	Oruf	18289252	18290181	+	H	6	930
Chr01_CW07	Chr01	CW07	Oruf	18293177	18294261	+	H	7	1085
Chr01_CW07	Chr01	CW07	Oruf	18294902	18295831	+	H	6	930
Chr01_CW07	Chr01	CW07	Oruf	18296472	18297556	+	H	7	1085
Chr01_CW07	Chr01	CW07	Oruf	18298197	18299281	+	H	7	1085
Chr01_CW07	Chr01	CW07	Oruf	18299922	18300851	+	H	6	930
Chr01_CW07	Chr01	CW07	Oruf	18301492	18302575	+	H	7	1084
Chr01_CW07	Chr01	CW07	Oruf	18304941	18305870	+	H	6	930
Chr01_CW07	Chr01	CW07	Oruf	18306821	18307750	+	H	6	930
Chr01_CW07	Chr01	CW07	Oruf	18308546	18309475	+	H	6	930
Chr01_CW07	Chr01	CW07	Oruf	18310426	18311355	+	H	6	930
Chr01_CW07	Chr01	CW07	Oruf	18312151	18313080	+	H	6	930
Chr01_CW07	Chr01	CW07	Oruf	18314031	18315115	+	H	7	1085
Chr01_CW07	Chr01	CW07	Oruf	18317326	18318096	+	H	5	771
Chr01_CW07	Chr01	CW07	Oruf	18319495	18320269	+	H	5	775
Chr01_CW07	Chr01	CW07	Oruf	18321220	18322304	+	H	7	1085
Chr01_CW07	Chr01	CW07	Oruf	18324515	18325285	+	H	5	771
Chr01_CW07	Chr01	CW07	Oruf	18326684	18327768	+	H	7	1085
Chr01_CW07	Chr01	CW07	Oruf	18329979	18330749	+	H	5	771
Chr01_CW07	Chr01	CW07	Oruf	18332148	18333232	+	H	7	1085
Chr01_CW07	Chr01	CW07	Oruf	18354275	18355049	+	H	5	775
Chr01_CW07	Chr01	CW07	Oruf	18356475	18357249	+	H	5	775
Chr01_CW07	Chr01	CW07	Oruf	18362950	18363724	+	H	5	775
Chr01_CW07	Chr01	CW07	Oruf	18367700	18368474	+	H	5	775
Chr01_CW07	Chr01	CW07	Oruf	18371655	18372429	+	H	5	775
Chr01_CW07	Chr01	CW07	Oruf	18484946	18497355	+	D	12	12410
Chr01_CW07	Chr01	CW07	Oruf	18523731	18534396	+	D	66	10666
Chr01_CW07	Chr01	CW07	Oruf	18534697	18535845	+	D	7	1149
Chr01_CW07	Chr01	CW07	Oruf	18536146	18540978	+	D	30	4833
Chr01_CW07	Chr01	CW07	Oruf	18541279	18542427	+	D	7	1149
Chr01_CW07	Chr01	CW07	Oruf	18542728	18543876	+	D	7	1149
Chr01_CW07	Chr01	CW07	Oruf	18544177	18545325	+	D	7	1149
Chr01_CW07	Chr01	CW07	Oruf	18545626	18546774	+	D	7	1149
Chr01_CW07	Chr01	CW07	Oruf	18547075	18548223	+	D	7	1149
Chr01_CW07	Chr01	CW07	Oruf	18548524	18549672	+	D	7	1149
Chr01_CW07	Chr01	CW07	Oruf	18549973	18551121	+	D	7	1149
Chr01_CW07	Chr01	CW07	Oruf	18551422	18552570	+	D	7	1149
Chr01_CW07	Chr01	CW07	Oruf	18552871	18554019	+	D	7	1149
Chr01_CW07	Chr01	CW07	Oruf	18554320	18555468	+	D	7	1149
Chr01_CW07	Chr01	CW07	Oruf	18555769	18556917	+	D	7	1149
Chr01_CW07	Chr01	CW07	Oruf	18557218	18558366	+	D	7	1149
Chr01_CW07	Chr01	CW07	Oruf	18558667	18559815	+	D	7	1149
Chr01_CW07	Chr01	CW07	Oruf	18560116	18561264	+	D	7	1149
Chr01_CW07	Chr01	CW07	Oruf	18561565	18562713	+	D	7	1149
Chr01_CW07	Chr01	CW07	Oruf	18563014	18564162	+	D	7	1149
Chr01_CW07	Chr01	CW07	Oruf	18564463	18565611	+	D	7	1149
Chr01_CW07	Chr01	CW07	Oruf	18565912	18567060	+	D	7	1149
Chr01_CW07	Chr01	CW07	Oruf	18567361	18568509	+	D	7	1149
Chr01_CW07	Chr01	CW07	Oruf	18568810	18569958	+	D	7	1149
Chr01_CW07	Chr01	CW07	Oruf	18570259	18571242	+	D	6	984
Chr01_CW07	Chr01	CW07	Oruf	18571543	18572691	+	D	7	1149
Chr01_CW07	Chr01	CW07	Oruf	18572992	18574140	+	D	7	1149
Chr01_CW07	Chr01	CW07	Oruf	18574441	18575589	+	D	7	1149
Chr01_CW07	Chr01	CW07	Oruf	18577052	18577883	+	D	5	832
Chr01_CW07	Chr01	CW07	Oruf	18650321	18651316	+	D	6	996
Chr01_CW07	Chr01	CW07	Oruf	18658064	18660390	+	D	14	2327
Chr01_CW07	Chr01	CW07	Oruf	18660556	18661551	+	D	6	996
Chr01_CW07	Chr01	CW07	Oruf	18668300	18678256	+	D	60	9957
Chr01_CW07	Chr01	CW07	Oruf	18678882	18680378	+	D	9	1497
Chr01_CW07	Chr01	CW07	Oruf	18680544	18682532	+	D	12	1989
Chr01_CW07	Chr01	CW07	Oruf	18682678	18683969	+	D	8	1292
Chr01_CW09	Chr01	CW09	Oruf	17546340	17547108	+	H	5	769
Chr01_CW09	Chr01	CW09	Oruf	17551198	17552187	+	E	6	990
Chr01_CW09	Chr01	CW09	Oruf	17559852	17560623	-	H	5	772
Chr01_CW09	Chr01	CW09	Oruf	17563619	17564388	-	H	5	770
Chr01_CW09	Chr01	CW09	Oruf	17578915	17580399	+	E	9	1485
Chr01_CW09	Chr01	CW09	Oruf	17581039	17581808	+	H	5	770
Chr01_CW09	Chr01	CW09	Oruf	17581809	17582654	+	E	5	846
Chr01_CW09	Chr01	CW09	Oruf	17585223	17586782	+	H	5	1560
Chr01_CW09	Chr01	CW09	Oruf	17594274	17595823	+	H	10	1550
Chr01_CW09	Chr01	CW09	Oruf	17599098	17599872	+	H	5	775
Chr01_CW09	Chr01	CW09	Oruf	17601442	17602216	+	H	5	775
Chr01_CW09	Chr01	CW09	Oruf	17634823	17635596	+	H	5	774
Chr01_CW11	Chr01	CW11	Oruf	17478400	17479170	+	H	5	771
Chr01_CW11	Chr01	CW11	Oruf	17483260	17484247	+	E	6	988
Chr01_CW11	Chr01	CW11	Oruf	17491912	17492686	-	H	5	775
Chr01_CW11	Chr01	CW11	Oruf	17495679	17496448	-	H	5	770
Chr01_CW11	Chr01	CW11	Oruf	17510975	17512459	+	E	9	1485
Chr01_CW11	Chr01	CW11	Oruf	17513099	17513868	+	H	5	770
Chr01_CW11	Chr01	CW11	Oruf	17513869	17514714	+	E	5	846
Chr01_CW11	Chr01	CW11	Oruf	17517283	17518842	+	H	5	1560
Chr01_CW11	Chr01	CW11	Oruf	17526334	17527883	+	H	10	1550
Chr01_CW11	Chr01	CW11	Oruf	17531158	17531932	+	H	5	775
Chr01_CW11	Chr01	CW11	Oruf	17533502	17534276	+	H	5	775
Chr01_CW11	Chr01	CW11	Oruf	17542496	17543322	-	E	5	827
Chr01_CW11	Chr01	CW11	Oruf	17566883	17567656	+	H	5	774
Chr01_CW13	Chr01	CW13	Oruf	19387832	19401849	+	H	7	14018
Chr01_CW13	Chr01	CW13	Oruf	19477821	19478905	+	H	7	1085
Chr01_CW13	Chr01	CW13	Oruf	19479071	19480155	+	H	7	1085
Chr01_CW13	Chr01	CW13	Oruf	19480641	19482965	+	H	15	2325
Chr01_CW13	Chr01	CW13	Oruf	19484408	19485182	+	H	5	775
Chr01_CW13	Chr01	CW13	Oruf	19495994	19498628	+	H	17	2635
Chr01_CW13	Chr01	CW13	Oruf	19499434	19502068	+	H	17	2635
Chr01_CW13	Chr01	CW13	Oruf	19503659	19504743	+	H	7	1085
Chr01_CW13	Chr01	CW13	Oruf	19504908	19505682	+	H	5	775
Chr01_CW13	Chr01	CW13	Oruf	19506963	19507737	+	H	5	775
Chr01_CW13	Chr01	CW13	Oruf	19509018	19509792	+	H	5	775
Chr01_CW13	Chr01	CW13	Oruf	19513524	19514299	+	H	5	776
Chr01_CW13	Chr01	CW13	Oruf	19514464	19515237	+	H	5	774
Chr01_CW13	Chr01	CW13	Oruf	19517767	19518542	+	H	5	776
Chr01_CW13	Chr01	CW13	Oruf	19555845	19556619	+	H	5	775
Chr01_CW13	Chr01	CW13	Oruf	19561058	19561832	+	H	5	775
Chr01_CW13	Chr01	CW13	Oruf	19575208	19587806	+	D	14	12599
Chr01_CW13	Chr01	CW13	Oruf	19589671	19590998	+	D	8	1328
Chr01_CW13	Chr01	CW13	Oruf	19591951	19593278	+	D	8	1328
Chr01_CW13	Chr01	CW13	Oruf	19594231	19595558	+	D	8	1328
Chr01_CW13	Chr01	CW13	Oruf	19596055	19597217	+	D	7	1163
Chr01_CW13	Chr01	CW13	Oruf	19598170	19599497	+	D	8	1328
Chr01_CW13	Chr01	CW13	Oruf	19601939	19603101	+	D	7	1163
Chr01_CW13	Chr01	CW13	Oruf	19603927	19605089	+	D	7	1163
Chr01_CW13	Chr01	CW13	Oruf	19607247	19608907	+	D	10	1661
Chr01_CW13	Chr01	CW13	Oruf	19609073	19610235	+	D	7	1163
Chr01_CW13	Chr01	CW13	Oruf	19611065	19612725	+	D	10	1661
Chr01_CW13	Chr01	CW13	Oruf	19623677	19624505	+	D	5	829
Chr01_CW13	Chr01	CW13	Oruf	19626189	19673758	+	D	32	47570
Chr01_CW13	Chr01	CW13	Oruf	19674907	19675736	+	D	5	830
Chr01_CW13	Chr01	CW13	Oruf	19676358	19677683	+	D	8	1326
Chr01_CW13	Chr01	CW13	Oruf	19678511	19679340	+	D	5	830
Chr01_CW13	Chr01	CW13	Oruf	19680790	19682117	+	D	8	1328
Chr01_CW13	Chr01	CW13	Oruf	19753098	19754088	+	D	6	991
Chr01_CW13	Chr01	CW13	Oruf	19754255	19755249	+	D	6	995
Chr01_CW13	Chr01	CW13	Oruf	19762009	19768981	+	D	42	6973
Chr01_CW13	Chr01	CW13	Oruf	19769607	19774229	+	D	28	4623
Chr01_CW13	Chr01	CW13	Oruf	19774396	19775558	+	D	7	1163
Chr01_CW14	Chr01	CW14	Oruf	18427048	18427816	+	H	5	769
Chr01_CW14	Chr01	CW14	Oruf	18515297	18516381	+	H	7	1085
Chr01_CW14	Chr01	CW14	Oruf	18518922	18519853	+	H	6	932
Chr01_CW14	Chr01	CW14	Oruf	18520017	18520946	+	H	6	930
Chr01_CW14	Chr01	CW14	Oruf	18523477	18524251	+	H	5	775
Chr01_CW14	Chr01	CW14	Oruf	18524737	18525511	+	H	5	775
Chr01_CW14	Chr01	CW14	Oruf	18526627	18527401	+	H	5	775
Chr01_CW14	Chr01	CW14	Oruf	18530252	18531181	+	H	6	930
Chr01_CW14	Chr01	CW14	Oruf	18534827	18535601	+	H	5	775
Chr01_CW14	Chr01	CW14	Oruf	18537667	18538595	+	H	6	929
Chr01_CW14	Chr01	CW14	Oruf	18545731	18546815	+	H	7	1085
Chr01_CW14	Chr01	CW14	Oruf	18548251	18549180	+	H	6	930
Chr01_CW14	Chr01	CW14	Oruf	18549346	18550585	+	H	8	1240
Chr01_CW14	Chr01	CW14	Oruf	18552014	18553563	+	H	10	1550
Chr01_CW14	Chr01	CW14	Oruf	18554204	18554978	+	H	5	775
Chr01_CW14	Chr01	CW14	Oruf	18555144	18555918	+	H	5	775
Chr01_CW14	Chr01	CW14	Oruf	18556404	18557333	+	H	6	930
Chr01_CW14	Chr01	CW14	Oruf	18557974	18558748	+	H	5	775
Chr01_CW14	Chr01	CW14	Oruf	18558914	18559688	+	H	5	775
Chr01_CW14	Chr01	CW14	Oruf	18559854	18560628	+	H	5	775
Chr01_CW14	Chr01	CW14	Oruf	18566309	18567083	+	H	5	775
Chr01_CW14	Chr01	CW14	Oruf	18567249	18568023	+	H	5	775
Chr01_CW14	Chr01	CW14	Oruf	18569924	18571008	+	H	7	1085
Chr01_CW14	Chr01	CW14	Oruf	18571648	18572732	+	H	7	1085
Chr01_CW14	Chr01	CW14	Oruf	18574002	18575086	+	H	7	1085
Chr01_CW14	Chr01	CW14	Oruf	18577627	18578401	+	H	5	775
Chr01_CW14	Chr01	CW14	Oruf	18580943	18581717	+	H	5	775
Chr01_CW14	Chr01	CW14	Oruf	18584579	18585353	+	H	5	775
Chr01_CW14	Chr01	CW14	Oruf	18588215	18588989	+	H	5	775
Chr01_CW14	Chr01	CW14	Oruf	18593430	18594204	+	H	5	775
Chr01_CW14	Chr01	CW14	Oruf	18608134	18609653	+	H	10	1520
Chr01_CW14	Chr01	CW14	Oruf	18612823	18615117	+	H	15	2295
Chr01_CW14	Chr01	CW14	Oruf	18616233	18617164	+	H	6	932
Chr01_CW14	Chr01	CW14	Oruf	18694705	18707305	+	D	14	12601
Chr01_CW14	Chr01	CW14	Oruf	18721263	18859254	+	D	8	137992
Chr01_CW14	Chr01	CW14	Oruf	18860450	18861280	+	D	5	831
Chr01_CW14	Chr01	CW14	Oruf	18862571	18863725	+	D	7	1155
Chr01_CW14	Chr01	CW14	Oruf	18866408	18874707	+	D	50	8300
Chr01_CW14	Chr01	CW14	Oruf	18875333	18876828	+	D	9	1496
Chr01_CW14	Chr01	CW14	Oruf	18876994	18879811	+	D	17	2818
Chr01_CW14	Chr01	CW14	Oruf	18879957	18881418	+	D	9	1462
Chr01_CW15	Chr01	CW15	Oruf	18400608	18414629	+	H	7	14022
Chr01_CW15	Chr01	CW15	Oruf	18457429	18458202	-	H	5	774
Chr01_CW15	Chr01	CW15	Oruf	18458368	18459141	-	H	5	774
Chr01_CW15	Chr01	CW15	Oruf	18489168	18490252	+	H	7	1085
Chr01_CW15	Chr01	CW15	Oruf	18491368	18492452	+	H	7	1085
Chr01_CW15	Chr01	CW15	Oruf	18492938	18494179	+	H	8	1242
Chr01_CW15	Chr01	CW15	Oruf	18494343	18495272	+	H	6	930
Chr01_CW15	Chr01	CW15	Oruf	18495913	18496687	+	H	5	775
Chr01_CW15	Chr01	CW15	Oruf	18497958	18498732	+	H	5	775
Chr01_CW15	Chr01	CW15	Oruf	18499218	18499992	+	H	5	775
Chr01_CW15	Chr01	CW15	Oruf	18501108	18501882	+	H	5	775
Chr01_CW15	Chr01	CW15	Oruf	18504734	18505663	+	H	6	930
Chr01_CW15	Chr01	CW15	Oruf	18509309	18510083	+	H	5	775
Chr01_CW15	Chr01	CW15	Oruf	18512149	18513077	+	H	6	929
Chr01_CW15	Chr01	CW15	Oruf	18520213	18521297	+	H	7	1085
Chr01_CW15	Chr01	CW15	Oruf	18522733	18523662	+	H	6	930
Chr01_CW15	Chr01	CW15	Oruf	18523828	18525067	+	H	8	1240
Chr01_CW15	Chr01	CW15	Oruf	18526496	18528045	+	H	10	1550
Chr01_CW15	Chr01	CW15	Oruf	18528686	18529460	+	H	5	775
Chr01_CW15	Chr01	CW15	Oruf	18529626	18530400	+	H	5	775
Chr01_CW15	Chr01	CW15	Oruf	18530886	18531815	+	H	6	930
Chr01_CW15	Chr01	CW15	Oruf	18532456	18533230	+	H	5	775
Chr01_CW15	Chr01	CW15	Oruf	18533396	18534170	+	H	5	775
Chr01_CW15	Chr01	CW15	Oruf	18534336	18535110	+	H	5	775
Chr01_CW15	Chr01	CW15	Oruf	18540791	18541565	+	H	5	775
Chr01_CW15	Chr01	CW15	Oruf	18541731	18542505	+	H	5	775
Chr01_CW15	Chr01	CW15	Oruf	18544406	18545490	+	H	7	1085
Chr01_CW15	Chr01	CW15	Oruf	18546130	18547214	+	H	7	1085
Chr01_CW15	Chr01	CW15	Oruf	18548484	18549568	+	H	7	1085
Chr01_CW15	Chr01	CW15	Oruf	18552109	18552883	+	H	5	775
Chr01_CW15	Chr01	CW15	Oruf	18555425	18556199	+	H	5	775
Chr01_CW15	Chr01	CW15	Oruf	18559061	18559835	+	H	5	775
Chr01_CW15	Chr01	CW15	Oruf	18562697	18563471	+	H	5	775
Chr01_CW15	Chr01	CW15	Oruf	18567912	18568686	+	H	5	775
Chr01_CW15	Chr01	CW15	Oruf	18582616	18584135	+	H	10	1520
Chr01_CW15	Chr01	CW15	Oruf	18587305	18589599	+	H	15	2295
Chr01_CW15	Chr01	CW15	Oruf	18590715	18591646	+	H	6	932
Chr01_CW15	Chr01	CW15	Oruf	18669187	18681788	+	D	14	12602
Chr01_CW15	Chr01	CW15	Oruf	18693236	18834747	+	D	5	141512
Chr01_CW15	Chr01	CW15	Oruf	18835738	18836734	+	D	6	997
Chr01_CW15	Chr01	CW15	Oruf	18841695	18849994	+	D	50	8300
Chr01_CW15	Chr01	CW15	Oruf	18850620	18852115	+	D	9	1496
Chr01_CW15	Chr01	CW15	Oruf	18852281	18855098	+	D	17	2818
Chr01_CW15	Chr01	CW15	Oruf	18855244	18856535	+	D	8	1292
Chr01_CW15	Chr01	CW15	Oruf	18883617	18884700	-	H	7	1084
Chr01_CW18	Chr01	CW18	Oruf	19844472	19858767	+	H	8	14296
Chr01_CW18	Chr01	CW18	Oruf	19907629	19908715	+	H	7	1087
Chr01_CW18	Chr01	CW18	Oruf	19959854	19961093	+	H	8	1240
Chr01_CW18	Chr01	CW18	Oruf	19971283	19972213	+	H	6	931
Chr01_CW18	Chr01	CW18	Oruf	19973964	19975670	+	H	11	1707
Chr01_CW18	Chr01	CW18	Oruf	19977421	19978805	+	H	9	1385
Chr01_CW18	Chr01	CW18	Oruf	19985765	19986539	+	H	5	775
Chr01_CW18	Chr01	CW18	Oruf	19990357	19992628	+	H	14	2272
Chr01_CW18	Chr01	CW18	Oruf	19999599	20001460	+	H	12	1862
Chr01_CW18	Chr01	CW18	Oruf	20001624	20002398	+	H	5	775
Chr01_CW18	Chr01	CW18	Oruf	20005088	20006017	+	H	6	930
Chr01_CW18	Chr01	CW18	Oruf	20006183	20006959	+	H	5	777
Chr01_CW18	Chr01	CW18	Oruf	20007908	20008684	+	H	5	777
Chr01_CW18	Chr01	CW18	Oruf	20015528	20016304	+	H	5	777
Chr01_CW18	Chr01	CW18	Oruf	20028280	20029209	+	H	6	930
Chr01_CW18	Chr01	CW18	Oruf	20039321	20040095	+	H	5	775
Chr01_CW18	Chr01	CW18	Oruf	20044051	20044825	+	H	5	775
Chr01_CW18	Chr01	CW18	Oruf	20044991	20045920	+	H	6	930
Chr01_CW18	Chr01	CW18	Oruf	20048141	20048915	+	H	5	775
Chr01_CW18	Chr01	CW18	Oruf	20049401	20050175	+	H	5	775
Chr01_CW18	Chr01	CW18	Oruf	20050971	20051900	+	H	6	930
Chr01_CW18	Chr01	CW18	Oruf	20052386	20053160	+	H	5	775
Chr01_CW18	Chr01	CW18	Oruf	20056011	20056940	+	H	6	930
Chr01_CW18	Chr01	CW18	Oruf	20057581	20058510	+	H	6	930
Chr01_CW18	Chr01	CW18	Oruf	20059626	20060710	+	H	7	1085
Chr01_CW18	Chr01	CW18	Oruf	20127702	20140132	+	D	13	12431
Chr01_CW18	Chr01	CW18	Oruf	20278062	20279057	+	D	6	996
Chr01_CW18	Chr01	CW18	Oruf	20282798	20284712	+	D	5	1915
Chr01_CW18	Chr01	CW18	Oruf	20285805	20288131	+	D	14	2327
Chr01_CW18	Chr01	CW18	Oruf	20288297	20289292	+	D	6	996
Chr01_CW18	Chr01	CW18	Oruf	20296042	20297870	+	D	11	1829
Chr01_CW18	Chr01	CW18	Oruf	20299793	20303780	+	D	24	3988
Chr01_CW18	Chr01	CW18	Oruf	20304406	20305902	+	D	9	1497
Chr01_CW18	Chr01	CW18	Oruf	20306068	20308885	+	D	17	2818
Chr01_CW18	Chr01	CW18	Oruf	20309032	20310322	+	D	8	1291
Chr01_CW22	Chr01	CW22	Oruf	17904977	17919000	+	H	7	14024
Chr01_CW22	Chr01	CW22	Oruf	17965904	17966990	+	H	7	1087
Chr01_CW22	Chr01	CW22	Oruf	17987018	17987791	-	H	5	774
Chr01_CW22	Chr01	CW22	Oruf	17987957	17988730	-	H	5	774
Chr01_CW22	Chr01	CW22	Oruf	18018130	18019369	+	H	8	1240
Chr01_CW22	Chr01	CW22	Oruf	18029559	18030489	+	H	6	931
Chr01_CW22	Chr01	CW22	Oruf	18032240	18033946	+	H	11	1707
Chr01_CW22	Chr01	CW22	Oruf	18035697	18037081	+	H	9	1385
Chr01_CW22	Chr01	CW22	Oruf	18044041	18044815	+	H	5	775
Chr01_CW22	Chr01	CW22	Oruf	18048633	18050904	+	H	14	2272
Chr01_CW22	Chr01	CW22	Oruf	18057875	18059736	+	H	12	1862
Chr01_CW22	Chr01	CW22	Oruf	18059900	18060674	+	H	5	775
Chr01_CW22	Chr01	CW22	Oruf	18063364	18064293	+	H	6	930
Chr01_CW22	Chr01	CW22	Oruf	18064459	18065235	+	H	5	777
Chr01_CW22	Chr01	CW22	Oruf	18066184	18066960	+	H	5	777
Chr01_CW22	Chr01	CW22	Oruf	18073804	18074580	+	H	5	777
Chr01_CW22	Chr01	CW22	Oruf	18086556	18087485	+	H	6	930
Chr01_CW22	Chr01	CW22	Oruf	18097597	18098371	+	H	5	775
Chr01_CW22	Chr01	CW22	Oruf	18102327	18103101	+	H	5	775
Chr01_CW22	Chr01	CW22	Oruf	18103267	18104196	+	H	6	930
Chr01_CW22	Chr01	CW22	Oruf	18106417	18107191	+	H	5	775
Chr01_CW22	Chr01	CW22	Oruf	18107677	18108451	+	H	5	775
Chr01_CW22	Chr01	CW22	Oruf	18109247	18110176	+	H	6	930
Chr01_CW22	Chr01	CW22	Oruf	18110662	18111436	+	H	5	775
Chr01_CW22	Chr01	CW22	Oruf	18114287	18115216	+	H	6	930
Chr01_CW22	Chr01	CW22	Oruf	18115857	18116786	+	H	6	930
Chr01_CW22	Chr01	CW22	Oruf	18117902	18118986	+	H	7	1085
Chr01_CW22	Chr01	CW22	Oruf	18183604	18196035	+	D	13	12432
Chr01_CW22	Chr01	CW22	Oruf	18224729	18244780	+	D	124	20052
Chr01_CW22	Chr01	CW22	Oruf	18245081	18253894	+	D	55	8814
Chr01_CW22	Chr01	CW22	Oruf	18254060	18255028	+	D	6	969
Chr01_CW22	Chr01	CW22	Oruf	18258104	18259389	+	D	7	1286
Chr01_CW22	Chr01	CW22	Oruf	18333851	18334846	+	D	6	996
Chr01_CW22	Chr01	CW22	Oruf	18336799	18338715	+	D	5	1917
Chr01_CW22	Chr01	CW22	Oruf	18339808	18347941	+	D	49	8134
Chr01_CW22	Chr01	CW22	Oruf	18348565	18349871	+	D	8	1307
Chr01_CW22	Chr01	CW22	Oruf	18350037	18353187	+	D	19	3151
Chr01_CX20	Chr01	CX20	XI	17293991	17295306	-	E	8	1316
Chr01_CX20	Chr01	CX20	XI	17296081	17296906	-	E	5	826
Chr01_CX20	Chr01	CX20	XI	17299165	17299989	-	E	5	825
Chr01_CX20	Chr01	CX20	XI	17318856	17319683	-	E	5	828
Chr01_CX20	Chr01	CX20	XI	17321683	17322673	-	E	6	991
Chr01_CX20	Chr01	CX20	XI	17324906	17325733	-	E	5	828
Chr01_CX20	Chr01	CX20	XI	17336152	17337968	-	E	11	1817
Chr01_CX20	Chr01	CX20	XI	17339946	17341267	-	E	8	1322
Chr01_CX20	Chr01	CX20	XI	17349748	17350903	-	E	7	1156
Chr01_CX20	Chr01	CX20	XI	17356183	17357004	-	E	5	822
Chr01_CX20	Chr01	CX20	XI	17365978	17375678	+	H	34	9701
Chr01_CX20	Chr01	CX20	XI	17376482	17377411	+	H	6	930
Chr01_CX20	Chr01	CX20	XI	17389392	17390304	+	H	6	913
Chr01_CX20	Chr01	CX20	XI	17391098	17391869	+	H	5	772
Chr01_CX20	Chr01	CX20	XI	17392035	17392962	+	H	6	928
Chr01_CX20	Chr01	CX20	XI	17394077	17395159	+	H	7	1083
Chr01_CX20	Chr01	CX20	XI	17397680	17398763	+	H	7	1084
Chr01_CX20	Chr01	CX20	XI	17399401	17400174	+	H	5	774
Chr01_CX20	Chr01	CX20	XI	17411642	17412412	+	H	5	771
Chr01_CX20	Chr01	CX20	XI	17512281	17513049	-	H	5	769
Chr01_CX20	Chr01	CX20	XI	17516582	17517903	-	E	8	1322
Chr01_CX20	Chr01	CX20	XI	17552333	17553100	-	H	5	768
Chr01_CX20	Chr01	CX20	XI	17556645	17557412	-	H	5	768
Chr01_CX20	Chr01	CX20	XI	17568535	17570021	-	E	9	1487
Chr01_CX20	Chr01	CX20	XI	17570813	17571634	-	E	5	822
Chr01_CX20	Chr01	CX20	XI	17571942	17572763	-	E	5	822
Chr01_CX20	Chr01	CX20	XI	17574864	17576018	-	E	7	1155
Chr01_CX20	Chr01	CX20	XI	17593680	17594891	+	H	8	1212
Chr01_CX20	Chr01	CX20	XI	17595533	17596463	+	H	6	931
Chr01_CX20	Chr01	CX20	XI	17597260	17598190	+	H	6	931
Chr01_CX20	Chr01	CX20	XI	17598987	17599762	+	H	5	776
Chr01_CX20	Chr01	CX20	XI	17600559	17601489	+	H	6	931
Chr01_CX20	Chr01	CX20	XI	17601655	17605372	+	H	24	3718
Chr01_CX20	Chr01	CX20	XI	17610155	17614028	+	H	25	3874
Chr01_CX20	Chr01	CX20	XI	17614980	17615909	+	H	6	930
Chr01_CX20	Chr01	CX20	XI	17616075	17617005	+	H	6	931
Chr01_CX20	Chr01	CX20	XI	17617172	17618721	+	H	10	1550
Chr01_CX20	Chr01	CX20	XI	17618887	17619816	+	H	6	930
Chr01_CX20	Chr01	CX20	XI	17619982	17621067	+	H	7	1086
Chr01_CX20	Chr01	CX20	XI	17621234	17625863	+	H	30	4630
Chr01_CX20	Chr01	CX20	XI	17626029	17626958	+	H	6	930
Chr01_CX20	Chr01	CX20	XI	17627124	17627893	+	H	5	770
Chr01_CX20	Chr01	CX20	XI	17628058	17629912	+	H	12	1855
Chr01_CX20	Chr01	CX20	XI	17630551	17631940	+	H	9	1390
Chr01_CX20	Chr01	CX20	XI	17632898	17633668	+	H	5	771
Chr01_CX20	Chr01	CX20	XI	17634626	17635396	+	H	5	771
Chr01_CX20	Chr01	CX20	XI	17636187	17637111	+	H	6	925
Chr01_CX20	Chr01	CX20	XI	17637276	17638046	+	H	5	771
Chr01_CX20	Chr01	CX20	XI	17638837	17639606	+	H	5	770
Chr01_CX20	Chr01	CX20	XI	17640397	17641166	+	H	5	770
Chr01_CX20	Chr01	CX20	XI	17641331	17643108	+	H	11	1778
Chr01_CX20	Chr01	CX20	XI	17647989	17650308	+	H	15	2320
Chr01_CX20	Chr01	CX20	XI	17651101	17665301	+	H	92	14201
Chr01_CX20	Chr01	CX20	XI	17671859	17674162	+	H	15	2304
Chr01_CX20	Chr01	CX20	XI	17674328	17676023	+	H	11	1696
Chr01_CX20	Chr01	CX20	XI	17676663	17677437	+	H	5	775
Chr01_CX20	Chr01	CX20	XI	17678232	17679006	+	H	5	775
Chr01_CX20	Chr01	CX20	XI	17680585	17685510	+	H	32	4926
Chr01_CX20	Chr01	CX20	XI	17685675	17687216	+	H	10	1542
Chr01_CX20	Chr01	CX20	XI	17687499	17688210	+	H	5	712
Chr01_CX20	Chr01	CX20	XI	17688850	17689616	+	H	5	767
Chr01_CX20	Chr01	CX20	XI	17689781	17690710	+	H	6	930
Chr01_CX20	Chr01	CX20	XI	17690993	17691704	+	H	5	712
Chr01_CX20	Chr01	CX20	XI	17692983	17693757	+	H	5	775
Chr01_CX20	Chr01	CX20	XI	17695035	17695808	+	H	5	774
Chr01_CX20	Chr01	CX20	XI	17697551	17698478	+	H	6	928
Chr01_CX20	Chr01	CX20	XI	17701191	17701964	+	H	5	774
Chr01_CX20	Chr01	CX20	XI	17704204	17706818	+	H	17	2615
Chr01_CX20	Chr01	CX20	XI	17706951	17709239	+	H	15	2289
Chr01_CX20	Chr01	CX20	XI	17709405	17712444	+	H	13	3040
Chr01_CX20	Chr01	CX20	XI	17712610	17713379	+	H	5	770
Chr01_CX20	Chr01	CX20	XI	17713545	17715236	+	H	11	1692
Chr01_CX20	Chr01	CX20	XI	17715402	17717554	+	H	14	2153
Chr01_CX20	Chr01	CX20	XI	17717720	17720481	+	H	18	2762
Chr01_CX20	Chr01	CX20	XI	17720647	17722799	+	H	14	2153
Chr01_CX20	Chr01	CX20	XI	17722965	17730369	+	H	25	7405
Chr01_CX20	Chr01	CX20	XI	17730535	17735318	+	H	31	4784
Chr01_CX20	Chr01	CX20	XI	17735484	17738418	+	H	19	2935
Chr01_CX20	Chr01	CX20	XI	17738584	17739354	+	H	5	771
Chr01_CX20	Chr01	CX20	XI	17739520	17745691	+	H	40	6172
Chr01_CX20	Chr01	CX20	XI	17745857	17749106	+	H	21	3250
Chr01_CX20	Chr01	CX20	XI	17749272	17752050	+	H	18	2779
Chr01_CX20	Chr01	CX20	XI	17752216	17766872	+	H	95	14657
Chr01_CX20	Chr01	CX20	XI	17767038	17778967	+	H	46	11930
Chr01_CX20	Chr01	CX20	XI	17779133	17781635	+	H	11	2503
Chr01_CX20	Chr01	CX20	XI	17783295	17784119	-	E	5	825
Chr01_CX20	Chr01	CX20	XI	17793295	17794445	-	E	7	1151
Chr01_CX20	Chr01	CX20	XI	17797346	17798090	-	H	5	745
Chr01_CX20	Chr01	CX20	XI	17798114	17798882	+	H	5	769
Chr01_CX20	Chr01	CX20	XI	17799843	17800616	+	H	5	774
Chr01_CX20	Chr01	CX20	XI	17805245	17806484	+	H	8	1240
Chr01_CX20	Chr01	CX20	XI	17806646	17807420	+	H	5	775
Chr01_CX20	Chr01	CX20	XI	17807582	17808976	+	H	9	1395
Chr01_CX20	Chr01	CX20	XI	17809923	17810697	+	H	5	775
Chr01_CX20	Chr01	CX20	XI	17810859	17811633	+	H	5	775
Chr01_CX20	Chr01	CX20	XI	17811799	17812883	+	H	7	1085
Chr01_CX20	Chr01	CX20	XI	17813370	17819188	+	H	9	5819
Chr01_CX20	Chr01	CX20	XI	17822987	17823765	+	H	5	779
Chr01_CX20	Chr01	CX20	XI	17825193	17827209	+	H	13	2017
Chr01_CX20	Chr01	CX20	XI	17860602	17861482	+	H	6	881
Chr01_CX20	Chr01	CX20	XI	17865613	17866493	+	H	6	881
Chr01_CX20	Chr01	CX20	XI	17867444	17868218	+	H	5	775
Chr01_CX20	Chr01	CX20	XI	17879573	17880795	+	H	8	1223
Chr01_CX20	Chr01	CX20	XI	17892882	17893966	+	H	7	1085
Chr01_CX20	Chr01	CX20	XI	17894447	17905670	+	H	7	11224
Chr01_CX20	Chr01	CX20	XI	17908674	17911621	+	H	19	2948
Chr01_CX20	Chr01	CX20	XI	17912882	17915519	+	H	17	2638
Chr01_CX20	Chr01	CX20	XI	17916780	17918331	+	H	10	1552
Chr01_CX20	Chr01	CX20	XI	17928405	17929154	+	H	5	750
Chr01_CX20	Chr01	CX20	XI	17946944	17947669	+	H	5	726
Chr01_CX20	Chr01	CX20	XI	17949169	17949894	+	H	5	726
Chr01_CX20	Chr01	CX20	XI	17951394	17952119	+	H	5	726
Chr01_CX20	Chr01	CX20	XI	17952584	17953309	+	H	5	726
Chr01_CX20	Chr01	CX20	XI	17956960	17957734	+	H	5	775
Chr01_CX20	Chr01	CX20	XI	17961479	17962253	+	H	5	775
Chr01_CX20	Chr01	CX20	XI	17962419	17963193	+	H	5	775
Chr01_CX20	Chr01	CX20	XI	17963359	17964133	+	H	5	775
Chr01_CX20	Chr01	CX20	XI	17975333	17976245	+	H	6	913
Chr01_CX20	Chr01	CX20	XI	17987384	17988468	+	H	7	1085
Chr01_CX20	Chr01	CX20	XI	17990059	17991143	+	H	7	1085
Chr01_CX20	Chr01	CX20	XI	17992734	17993818	+	H	7	1085
Chr01_CX20	Chr01	CX20	XI	17994460	18000275	+	H	8	5816
Chr01_CX20	Chr01	CX20	XI	18008154	18010789	+	H	17	2636
Chr01_CX20	Chr01	CX20	XI	18010954	18012348	+	H	9	1395
Chr01_CX20	Chr01	CX20	XI	18013773	18015477	+	H	11	1705
Chr01_CX20	Chr01	CX20	XI	18016272	18017046	+	H	5	775
Chr01_CX20	Chr01	CX20	XI	18020811	18021585	+	H	5	775
Chr01_CX20	Chr01	CX20	XI	18021750	18023454	+	H	11	1705
Chr01_CX20	Chr01	CX20	XI	18023620	18024554	+	H	6	935
Chr01_CX20	Chr01	CX20	XI	18024720	18025494	+	H	5	775
Chr01_CX20	Chr01	CX20	XI	18026884	18027813	+	H	6	930
Chr01_CX20	Chr01	CX20	XI	18027979	18028757	+	H	5	779
Chr01_CX20	Chr01	CX20	XI	18030027	18031429	+	H	9	1403
Chr01_CX20	Chr01	CX20	XI	18033331	18034109	+	H	5	779
Chr01_CX20	Chr01	CX20	XI	18034905	18036300	+	H	9	1396
Chr01_CX20	Chr01	CX20	XI	18123126	18123900	+	H	5	775
Chr01_CX3	Chr01	CX3	XI	17299250	17300567	-	E	8	1318
Chr01_CX3	Chr01	CX3	XI	17301340	17302165	-	E	5	826
Chr01_CX3	Chr01	CX3	XI	17304424	17305248	-	E	5	825
Chr01_CX3	Chr01	CX3	XI	17324119	17324943	-	E	5	825
Chr01_CX3	Chr01	CX3	XI	17326945	17327934	-	E	6	990
Chr01_CX3	Chr01	CX3	XI	17328506	17329304	-	E	5	799
Chr01_CX3	Chr01	CX3	XI	17330169	17330993	-	E	5	825
Chr01_CX3	Chr01	CX3	XI	17341414	17343228	-	E	11	1815
Chr01_CX3	Chr01	CX3	XI	17345208	17346527	-	E	8	1320
Chr01_CX3	Chr01	CX3	XI	17355011	17356164	-	E	7	1154
Chr01_CX3	Chr01	CX3	XI	17361445	17362265	-	E	5	821
Chr01_CX3	Chr01	CX3	XI	17371254	17380949	+	H	33	9696
Chr01_CX3	Chr01	CX3	XI	17381753	17382682	+	H	6	930
Chr01_CX3	Chr01	CX3	XI	17393725	17394639	+	H	6	915
Chr01_CX3	Chr01	CX3	XI	17395433	17396204	+	H	5	772
Chr01_CX3	Chr01	CX3	XI	17396370	17397297	+	H	6	928
Chr01_CX3	Chr01	CX3	XI	17398412	17399494	+	H	7	1083
Chr01_CX3	Chr01	CX3	XI	17402015	17403098	+	H	7	1084
Chr01_CX3	Chr01	CX3	XI	17403736	17404509	+	H	5	774
Chr01_CX3	Chr01	CX3	XI	17414097	17414867	+	H	5	771
Chr01_CX3	Chr01	CX3	XI	17454431	17458129	-	E	6	3699
Chr01_CX3	Chr01	CX3	XI	17514722	17515492	-	H	5	771
Chr01_CX3	Chr01	CX3	XI	17519025	17520344	-	E	8	1320
Chr01_CX3	Chr01	CX3	XI	17554774	17555543	-	H	5	770
Chr01_CX3	Chr01	CX3	XI	17559086	17559855	-	H	5	770
Chr01_CX3	Chr01	CX3	XI	17570982	17572466	-	E	9	1485
Chr01_CX3	Chr01	CX3	XI	17573260	17574079	-	E	5	820
Chr01_CX3	Chr01	CX3	XI	17574389	17575208	-	E	5	820
Chr01_CX3	Chr01	CX3	XI	17577311	17578465	-	E	7	1155
Chr01_CX3	Chr01	CX3	XI	17596261	17597345	+	H	7	1085
Chr01_CX3	Chr01	CX3	XI	17597987	17598917	+	H	6	931
Chr01_CX3	Chr01	CX3	XI	17599714	17600644	+	H	6	931
Chr01_CX3	Chr01	CX3	XI	17601441	17602216	+	H	5	776
Chr01_CX3	Chr01	CX3	XI	17603013	17603943	+	H	6	931
Chr01_CX3	Chr01	CX3	XI	17604109	17612444	+	H	25	8336
Chr01_CX3	Chr01	CX3	XI	17612610	17616483	+	H	25	3874
Chr01_CX3	Chr01	CX3	XI	17617435	17618365	+	H	6	931
Chr01_CX3	Chr01	CX3	XI	17618530	17619460	+	H	6	931
Chr01_CX3	Chr01	CX3	XI	17619626	17621176	+	H	10	1551
Chr01_CX3	Chr01	CX3	XI	17621342	17622272	+	H	6	931
Chr01_CX3	Chr01	CX3	XI	17622437	17623522	+	H	7	1086
Chr01_CX3	Chr01	CX3	XI	17623688	17628318	+	H	30	4631
Chr01_CX3	Chr01	CX3	XI	17628484	17629413	+	H	6	930
Chr01_CX3	Chr01	CX3	XI	17629579	17630348	+	H	5	770
Chr01_CX3	Chr01	CX3	XI	17630513	17632367	+	H	12	1855
Chr01_CX3	Chr01	CX3	XI	17633006	17634395	+	H	9	1390
Chr01_CX3	Chr01	CX3	XI	17635354	17636123	+	H	5	770
Chr01_CX3	Chr01	CX3	XI	17637082	17637851	+	H	5	770
Chr01_CX3	Chr01	CX3	XI	17638642	17639566	+	H	6	925
Chr01_CX3	Chr01	CX3	XI	17639731	17640501	+	H	5	771
Chr01_CX3	Chr01	CX3	XI	17641292	17642061	+	H	5	770
Chr01_CX3	Chr01	CX3	XI	17642852	17643621	+	H	5	770
Chr01_CX3	Chr01	CX3	XI	17643786	17645563	+	H	11	1778
Chr01_CX3	Chr01	CX3	XI	17650444	17652762	+	H	15	2319
Chr01_CX3	Chr01	CX3	XI	17653556	17667756	+	H	92	14201
Chr01_CX3	Chr01	CX3	XI	17674314	17676617	+	H	15	2304
Chr01_CX3	Chr01	CX3	XI	17676783	17678478	+	H	11	1696
Chr01_CX3	Chr01	CX3	XI	17679118	17679892	+	H	5	775
Chr01_CX3	Chr01	CX3	XI	17680687	17681461	+	H	5	775
Chr01_CX3	Chr01	CX3	XI	17683040	17687965	+	H	32	4926
Chr01_CX3	Chr01	CX3	XI	17688130	17689671	+	H	10	1542
Chr01_CX3	Chr01	CX3	XI	17689952	17690665	+	H	5	714
Chr01_CX3	Chr01	CX3	XI	17691305	17692071	+	H	5	767
Chr01_CX3	Chr01	CX3	XI	17692236	17693165	+	H	6	930
Chr01_CX3	Chr01	CX3	XI	17693446	17694159	+	H	5	714
Chr01_CX3	Chr01	CX3	XI	17695438	17696212	+	H	5	775
Chr01_CX3	Chr01	CX3	XI	17697490	17698263	+	H	5	774
Chr01_CX3	Chr01	CX3	XI	17700006	17700933	+	H	6	928
Chr01_CX3	Chr01	CX3	XI	17703646	17704419	+	H	5	774
Chr01_CX3	Chr01	CX3	XI	17706659	17710195	+	H	23	3537
Chr01_CX3	Chr01	CX3	XI	17710326	17712616	+	H	15	2291
Chr01_CX3	Chr01	CX3	XI	17712782	17715821	+	H	13	3040
Chr01_CX3	Chr01	CX3	XI	17715987	17716756	+	H	5	770
Chr01_CX3	Chr01	CX3	XI	17716922	17718613	+	H	11	1692
Chr01_CX3	Chr01	CX3	XI	17718779	17720931	+	H	14	2153
Chr01_CX3	Chr01	CX3	XI	17721097	17723858	+	H	18	2762
Chr01_CX3	Chr01	CX3	XI	17724024	17726176	+	H	14	2153
Chr01_CX3	Chr01	CX3	XI	17726342	17733746	+	H	24	7405
Chr01_CX3	Chr01	CX3	XI	17733912	17738695	+	H	31	4784
Chr01_CX3	Chr01	CX3	XI	17738861	17741795	+	H	19	2935
Chr01_CX3	Chr01	CX3	XI	17741961	17742731	+	H	5	771
Chr01_CX3	Chr01	CX3	XI	17742897	17749068	+	H	40	6172
Chr01_CX3	Chr01	CX3	XI	17749234	17752483	+	H	21	3250
Chr01_CX3	Chr01	CX3	XI	17752649	17755427	+	H	18	2779
Chr01_CX3	Chr01	CX3	XI	17755593	17770250	+	H	95	14658
Chr01_CX3	Chr01	CX3	XI	17770415	17782344	+	H	46	11930
Chr01_CX3	Chr01	CX3	XI	17782510	17785012	+	H	11	2503
Chr01_CX3	Chr01	CX3	XI	17786664	17787488	-	E	5	825
Chr01_CX3	Chr01	CX3	XI	17798782	17801332	-	H	6	2551
Chr01_CX3	Chr01	CX3	XI	17801640	17803054	+	H	7	1415
Chr01_CX3	Chr01	CX3	XI	17803220	17806927	+	H	17	3708
Chr01_CX3	Chr01	CX3	XI	17808622	17809861	+	H	8	1240
Chr01_CX3	Chr01	CX3	XI	17810023	17810797	+	H	5	775
Chr01_CX3	Chr01	CX3	XI	17810959	17812353	+	H	9	1395
Chr01_CX3	Chr01	CX3	XI	17813300	17814074	+	H	5	775
Chr01_CX3	Chr01	CX3	XI	17814236	17815010	+	H	5	775
Chr01_CX3	Chr01	CX3	XI	17815176	17816260	+	H	7	1085
Chr01_CX3	Chr01	CX3	XI	17816747	17822565	+	H	9	5819
Chr01_CX3	Chr01	CX3	XI	17826364	17827142	+	H	5	779
Chr01_CX3	Chr01	CX3	XI	17828570	17830587	+	H	13	2018
Chr01_CX3	Chr01	CX3	XI	17863979	17864859	+	H	6	881
Chr01_CX3	Chr01	CX3	XI	17868990	17869870	+	H	6	881
Chr01_CX3	Chr01	CX3	XI	17870821	17871595	+	H	5	775
Chr01_CX3	Chr01	CX3	XI	17883089	17884172	+	H	7	1084
Chr01_CX3	Chr01	CX3	XI	17896259	17897343	+	H	7	1085
Chr01_CX3	Chr01	CX3	XI	17897824	17909047	+	H	9	11224
Chr01_CX3	Chr01	CX3	XI	17912051	17914998	+	H	19	2948
Chr01_CX3	Chr01	CX3	XI	17916259	17918896	+	H	17	2638
Chr01_CX3	Chr01	CX3	XI	17920157	17921708	+	H	10	1552
Chr01_CX3	Chr01	CX3	XI	17931781	17932531	+	H	5	751
Chr01_CX3	Chr01	CX3	XI	17950321	17951046	+	H	5	726
Chr01_CX3	Chr01	CX3	XI	17952546	17953271	+	H	5	726
Chr01_CX3	Chr01	CX3	XI	17954771	17955496	+	H	5	726
Chr01_CX3	Chr01	CX3	XI	17955961	17956686	+	H	5	726
Chr01_CX3	Chr01	CX3	XI	17960337	17961111	+	H	5	775
Chr01_CX3	Chr01	CX3	XI	17964856	17965630	+	H	5	775
Chr01_CX3	Chr01	CX3	XI	17965796	17966570	+	H	5	775
Chr01_CX3	Chr01	CX3	XI	17966736	17967510	+	H	5	775
Chr01_CX3	Chr01	CX3	XI	17969664	17979622	+	H	8	9959
Chr01_CX3	Chr01	CX3	XI	17990761	17991845	+	H	7	1085
Chr01_CX3	Chr01	CX3	XI	17993436	17994520	+	H	7	1085
Chr01_CX3	Chr01	CX3	XI	17996111	17997195	+	H	7	1085
Chr01_CX3	Chr01	CX3	XI	17997837	18003652	+	H	8	5816
Chr01_CX3	Chr01	CX3	XI	18014680	18017315	+	H	17	2636
Chr01_CX3	Chr01	CX3	XI	18017480	18018874	+	H	9	1395
Chr01_CX3	Chr01	CX3	XI	18020299	18022003	+	H	11	1705
Chr01_CX3	Chr01	CX3	XI	18022798	18023572	+	H	5	775
Chr01_CX3	Chr01	CX3	XI	18026242	18027171	+	H	6	930
Chr01_CX3	Chr01	CX3	XI	18027337	18028111	+	H	5	775
Chr01_CX3	Chr01	CX3	XI	18028276	18029980	+	H	11	1705
Chr01_CX3	Chr01	CX3	XI	18030146	18031080	+	H	6	935
Chr01_CX3	Chr01	CX3	XI	18031246	18032020	+	H	5	775
Chr01_CX3	Chr01	CX3	XI	18033410	18034339	+	H	6	930
Chr01_CX3	Chr01	CX3	XI	18034505	18035283	+	H	5	779
Chr01_CX3	Chr01	CX3	XI	18036553	18037955	+	H	9	1403
Chr01_CX3	Chr01	CX3	XI	18039857	18040635	+	H	5	779
Chr01_CX3	Chr01	CX3	XI	18041431	18042826	+	H	9	1396
Chr01_HuaZhan	Chr01	HuaZhan	XI	17326648	17327966	-	E	8	1319
Chr01_HuaZhan	Chr01	HuaZhan	XI	17328738	17329563	-	E	5	826
Chr01_HuaZhan	Chr01	HuaZhan	XI	17332295	17333119	-	E	5	825
Chr01_HuaZhan	Chr01	HuaZhan	XI	17352141	17352967	-	E	5	827
Chr01_HuaZhan	Chr01	HuaZhan	XI	17354967	17355958	-	E	6	992
Chr01_HuaZhan	Chr01	HuaZhan	XI	17356111	17357102	-	E	6	992
Chr01_HuaZhan	Chr01	HuaZhan	XI	17359335	17360161	-	E	5	827
Chr01_HuaZhan	Chr01	HuaZhan	XI	17368842	17370658	-	E	11	1817
Chr01_HuaZhan	Chr01	HuaZhan	XI	17373263	17374584	-	E	8	1322
Chr01_HuaZhan	Chr01	HuaZhan	XI	17383066	17384221	-	E	7	1156
Chr01_HuaZhan	Chr01	HuaZhan	XI	17389500	17390322	-	E	5	823
Chr01_HuaZhan	Chr01	HuaZhan	XI	17399301	17408686	+	H	32	9386
Chr01_HuaZhan	Chr01	HuaZhan	XI	17420667	17421579	+	H	6	913
Chr01_HuaZhan	Chr01	HuaZhan	XI	17422373	17423144	+	H	5	772
Chr01_HuaZhan	Chr01	HuaZhan	XI	17423310	17424237	+	H	6	928
Chr01_HuaZhan	Chr01	HuaZhan	XI	17425352	17426434	+	H	7	1083
Chr01_HuaZhan	Chr01	HuaZhan	XI	17428955	17430038	+	H	7	1084
Chr01_HuaZhan	Chr01	HuaZhan	XI	17430204	17431287	+	H	7	1084
Chr01_HuaZhan	Chr01	HuaZhan	XI	17431925	17432698	+	H	5	774
Chr01_HuaZhan	Chr01	HuaZhan	XI	17442286	17443056	+	H	5	771
Chr01_HuaZhan	Chr01	HuaZhan	XI	17544225	17544993	-	H	5	769
Chr01_HuaZhan	Chr01	HuaZhan	XI	17548526	17549847	-	E	8	1322
Chr01_HuaZhan	Chr01	HuaZhan	XI	17584277	17585044	-	H	5	768
Chr01_HuaZhan	Chr01	HuaZhan	XI	17588589	17589356	-	H	5	768
Chr01_HuaZhan	Chr01	HuaZhan	XI	17600479	17601965	-	E	9	1487
Chr01_HuaZhan	Chr01	HuaZhan	XI	17602757	17603578	-	E	5	822
Chr01_HuaZhan	Chr01	HuaZhan	XI	17603886	17604707	-	E	5	822
Chr01_HuaZhan	Chr01	HuaZhan	XI	17606808	17607962	-	E	7	1155
Chr01_HuaZhan	Chr01	HuaZhan	XI	17625624	17626990	+	H	9	1367
Chr01_HuaZhan	Chr01	HuaZhan	XI	17627632	17628562	+	H	6	931
Chr01_HuaZhan	Chr01	HuaZhan	XI	17629359	17630289	+	H	6	931
Chr01_HuaZhan	Chr01	HuaZhan	XI	17631086	17631861	+	H	5	776
Chr01_HuaZhan	Chr01	HuaZhan	XI	17632658	17633588	+	H	6	931
Chr01_HuaZhan	Chr01	HuaZhan	XI	17633754	17637471	+	H	24	3718
Chr01_HuaZhan	Chr01	HuaZhan	XI	17642254	17646127	+	H	25	3874
Chr01_HuaZhan	Chr01	HuaZhan	XI	17647079	17648008	+	H	6	930
Chr01_HuaZhan	Chr01	HuaZhan	XI	17648174	17649104	+	H	6	931
Chr01_HuaZhan	Chr01	HuaZhan	XI	17649271	17650820	+	H	10	1550
Chr01_HuaZhan	Chr01	HuaZhan	XI	17650986	17651915	+	H	6	930
Chr01_HuaZhan	Chr01	HuaZhan	XI	17652081	17653166	+	H	7	1086
Chr01_HuaZhan	Chr01	HuaZhan	XI	17653333	17657962	+	H	30	4630
Chr01_HuaZhan	Chr01	HuaZhan	XI	17658128	17659057	+	H	6	930
Chr01_HuaZhan	Chr01	HuaZhan	XI	17659848	17660777	+	H	6	930
Chr01_HuaZhan	Chr01	HuaZhan	XI	17660943	17661712	+	H	5	770
Chr01_HuaZhan	Chr01	HuaZhan	XI	17661877	17663731	+	H	12	1855
Chr01_HuaZhan	Chr01	HuaZhan	XI	17664370	17666023	+	H	11	1654
Chr01_HuaZhan	Chr01	HuaZhan	XI	17666981	17667751	+	H	5	771
Chr01_HuaZhan	Chr01	HuaZhan	XI	17668691	17669461	+	H	5	771
Chr01_HuaZhan	Chr01	HuaZhan	XI	17670252	17671176	+	H	6	925
Chr01_HuaZhan	Chr01	HuaZhan	XI	17671341	17672111	+	H	5	771
Chr01_HuaZhan	Chr01	HuaZhan	XI	17672902	17673671	+	H	5	770
Chr01_HuaZhan	Chr01	HuaZhan	XI	17673836	17675613	+	H	11	1778
Chr01_HuaZhan	Chr01	HuaZhan	XI	17680494	17694694	+	H	92	14201
Chr01_HuaZhan	Chr01	HuaZhan	XI	17694860	17696555	+	H	11	1696
Chr01_HuaZhan	Chr01	HuaZhan	XI	17697195	17697969	+	H	5	775
Chr01_HuaZhan	Chr01	HuaZhan	XI	17698764	17699538	+	H	5	775
Chr01_HuaZhan	Chr01	HuaZhan	XI	17701117	17705733	+	H	30	4617
Chr01_HuaZhan	Chr01	HuaZhan	XI	17705898	17707439	+	H	10	1542
Chr01_HuaZhan	Chr01	HuaZhan	XI	17707722	17708433	+	H	5	712
Chr01_HuaZhan	Chr01	HuaZhan	XI	17709073	17709839	+	H	5	767
Chr01_HuaZhan	Chr01	HuaZhan	XI	17710004	17710933	+	H	6	930
Chr01_HuaZhan	Chr01	HuaZhan	XI	17711216	17711927	+	H	5	712
Chr01_HuaZhan	Chr01	HuaZhan	XI	17713206	17713980	+	H	5	775
Chr01_HuaZhan	Chr01	HuaZhan	XI	17715258	17716032	+	H	5	775
Chr01_HuaZhan	Chr01	HuaZhan	XI	17717775	17718702	+	H	6	928
Chr01_HuaZhan	Chr01	HuaZhan	XI	17721415	17722188	+	H	5	774
Chr01_HuaZhan	Chr01	HuaZhan	XI	17724901	17727515	+	H	17	2615
Chr01_HuaZhan	Chr01	HuaZhan	XI	17727681	17729993	+	H	15	2313
Chr01_HuaZhan	Chr01	HuaZhan	XI	17730159	17733198	+	H	13	3040
Chr01_HuaZhan	Chr01	HuaZhan	XI	17733364	17734133	+	H	5	770
Chr01_HuaZhan	Chr01	HuaZhan	XI	17734299	17735990	+	H	11	1692
Chr01_HuaZhan	Chr01	HuaZhan	XI	17736156	17738308	+	H	14	2153
Chr01_HuaZhan	Chr01	HuaZhan	XI	17738474	17741235	+	H	18	2762
Chr01_HuaZhan	Chr01	HuaZhan	XI	17741401	17743553	+	H	14	2153
Chr01_HuaZhan	Chr01	HuaZhan	XI	17743719	17745709	+	H	13	1991
Chr01_HuaZhan	Chr01	HuaZhan	XI	17749295	17751123	+	H	12	1829
Chr01_HuaZhan	Chr01	HuaZhan	XI	17751289	17756072	+	H	31	4784
Chr01_HuaZhan	Chr01	HuaZhan	XI	17756238	17759172	+	H	19	2935
Chr01_HuaZhan	Chr01	HuaZhan	XI	17759338	17760108	+	H	5	771
Chr01_HuaZhan	Chr01	HuaZhan	XI	17760274	17766445	+	H	40	6172
Chr01_HuaZhan	Chr01	HuaZhan	XI	17766611	17769389	+	H	18	2779
Chr01_HuaZhan	Chr01	HuaZhan	XI	17769555	17783904	+	H	93	14350
Chr01_HuaZhan	Chr01	HuaZhan	XI	17784070	17795999	+	H	46	11930
Chr01_HuaZhan	Chr01	HuaZhan	XI	17796165	17798667	+	H	11	2503
Chr01_HuaZhan	Chr01	HuaZhan	XI	17800327	17801151	-	E	5	825
Chr01_HuaZhan	Chr01	HuaZhan	XI	17810327	17811477	-	E	7	1151
Chr01_HuaZhan	Chr01	HuaZhan	XI	17814378	17815122	-	H	5	745
Chr01_HuaZhan	Chr01	HuaZhan	XI	17815146	17815914	+	H	5	769
Chr01_HuaZhan	Chr01	HuaZhan	XI	17816875	17817648	+	H	5	774
Chr01_HuaZhan	Chr01	HuaZhan	XI	17820344	17821117	+	H	5	774
Chr01_HuaZhan	Chr01	HuaZhan	XI	17825746	17826985	+	H	8	1240
Chr01_HuaZhan	Chr01	HuaZhan	XI	17827147	17827921	+	H	5	775
Chr01_HuaZhan	Chr01	HuaZhan	XI	17828083	17829477	+	H	9	1395
Chr01_HuaZhan	Chr01	HuaZhan	XI	17830424	17831198	+	H	5	775
Chr01_HuaZhan	Chr01	HuaZhan	XI	17831360	17832134	+	H	5	775
Chr01_HuaZhan	Chr01	HuaZhan	XI	17832300	17833384	+	H	7	1085
Chr01_HuaZhan	Chr01	HuaZhan	XI	17833871	17839689	+	H	8	5819
Chr01_HuaZhan	Chr01	HuaZhan	XI	17843488	17844266	+	H	5	779
Chr01_HuaZhan	Chr01	HuaZhan	XI	17845694	17847710	+	H	13	2017
Chr01_HuaZhan	Chr01	HuaZhan	XI	17881104	17881984	+	H	6	881
Chr01_HuaZhan	Chr01	HuaZhan	XI	17882935	17883709	+	H	5	775
Chr01_HuaZhan	Chr01	HuaZhan	XI	17895064	17896286	+	H	8	1223
Chr01_HuaZhan	Chr01	HuaZhan	XI	17908373	17909457	+	H	7	1085
Chr01_HuaZhan	Chr01	HuaZhan	XI	17909938	17921161	+	H	9	11224
Chr01_HuaZhan	Chr01	HuaZhan	XI	17924165	17927112	+	H	19	2948
Chr01_HuaZhan	Chr01	HuaZhan	XI	17928373	17931010	+	H	17	2638
Chr01_HuaZhan	Chr01	HuaZhan	XI	17932271	17933822	+	H	10	1552
Chr01_HuaZhan	Chr01	HuaZhan	XI	17943896	17944645	+	H	5	750
Chr01_HuaZhan	Chr01	HuaZhan	XI	17964289	17965014	+	H	5	726
Chr01_HuaZhan	Chr01	HuaZhan	XI	17965479	17966204	+	H	5	726
Chr01_HuaZhan	Chr01	HuaZhan	XI	17966669	17967394	+	H	5	726
Chr01_HuaZhan	Chr01	HuaZhan	XI	17971045	17971819	+	H	5	775
Chr01_HuaZhan	Chr01	HuaZhan	XI	17975564	17976338	+	H	5	775
Chr01_HuaZhan	Chr01	HuaZhan	XI	17976504	17977278	+	H	5	775
Chr01_HuaZhan	Chr01	HuaZhan	XI	17977444	17978218	+	H	5	775
Chr01_HuaZhan	Chr01	HuaZhan	XI	17989418	17990330	+	H	6	913
Chr01_HuaZhan	Chr01	HuaZhan	XI	18001877	18002961	+	H	7	1085
Chr01_HuaZhan	Chr01	HuaZhan	XI	18004552	18005636	+	H	7	1085
Chr01_HuaZhan	Chr01	HuaZhan	XI	18007227	18008311	+	H	7	1085
Chr01_HuaZhan	Chr01	HuaZhan	XI	18008953	18014768	+	H	9	5816
Chr01_HuaZhan	Chr01	HuaZhan	XI	18026579	18029214	+	H	17	2636
Chr01_HuaZhan	Chr01	HuaZhan	XI	18029379	18030773	+	H	9	1395
Chr01_HuaZhan	Chr01	HuaZhan	XI	18032198	18034678	+	H	16	2481
Chr01_HuaZhan	Chr01	HuaZhan	XI	18034844	18037324	+	H	16	2481
Chr01_HuaZhan	Chr01	HuaZhan	XI	18037490	18040900	+	H	22	3411
Chr01_HuaZhan	Chr01	HuaZhan	XI	18041695	18042469	+	H	5	775
Chr01_HuaZhan	Chr01	HuaZhan	XI	18046234	18047008	+	H	5	775
Chr01_HuaZhan	Chr01	HuaZhan	XI	18047173	18048877	+	H	11	1705
Chr01_HuaZhan	Chr01	HuaZhan	XI	18049043	18049977	+	H	6	935
Chr01_HuaZhan	Chr01	HuaZhan	XI	18050143	18050917	+	H	5	775
Chr01_HuaZhan	Chr01	HuaZhan	XI	18052307	18053236	+	H	6	930
Chr01_HuaZhan	Chr01	HuaZhan	XI	18053402	18054180	+	H	5	779
Chr01_HuaZhan	Chr01	HuaZhan	XI	18055450	18056852	+	H	9	1403
Chr01_HuaZhan	Chr01	HuaZhan	XI	18058754	18059532	+	H	5	779
Chr01_HuaZhan	Chr01	HuaZhan	XI	18060328	18061723	+	H	9	1396
Chr01_HuaZhan	Chr01	HuaZhan	XI	18153782	18154556	+	H	5	775
Chr01_J4155S	Chr01	J4155S	XI	17187316	17188085	-	H	5	770
Chr01_J4155S	Chr01	J4155S	XI	17192301	17193125	-	E	5	825
Chr01_J4155S	Chr01	J4155S	XI	17198989	17199978	-	E	6	990
Chr01_J4155S	Chr01	J4155S	XI	17203369	17204193	-	E	5	825
Chr01_J4155S	Chr01	J4155S	XI	17225177	17226001	-	E	5	825
Chr01_J4155S	Chr01	J4155S	XI	17229968	17230792	-	E	5	825
Chr01_J4155S	Chr01	J4155S	XI	17241245	17242236	-	E	6	992
Chr01_J4155S	Chr01	J4155S	XI	17247108	17248035	+	H	6	928
Chr01_J4155S	Chr01	J4155S	XI	17255254	17256956	+	H	11	1703
Chr01_J4155S	Chr01	J4155S	XI	17257122	17257896	+	H	5	775
Chr01_J4155S	Chr01	J4155S	XI	17259165	17259939	+	H	5	775
Chr01_J4155S	Chr01	J4155S	XI	17261525	17263069	+	H	10	1545
Chr01_J4155S	Chr01	J4155S	XI	17264026	17265724	+	H	11	1699
Chr01_J4155S	Chr01	J4155S	XI	17265889	17267587	+	H	11	1699
Chr01_J4155S	Chr01	J4155S	XI	17267752	17269142	+	H	9	1391
Chr01_J4155S	Chr01	J4155S	XI	17269307	17270388	+	H	7	1082
Chr01_J4155S	Chr01	J4155S	XI	17270553	17271634	+	H	7	1082
Chr01_J4155S	Chr01	J4155S	XI	17271799	17272882	+	H	7	1084
Chr01_J4155S	Chr01	J4155S	XI	17273048	17275368	+	H	15	2321
Chr01_J4155S	Chr01	J4155S	XI	17275533	17277388	+	H	12	1856
Chr01_J4155S	Chr01	J4155S	XI	17277553	17278324	+	H	5	772
Chr01_J4155S	Chr01	J4155S	XI	17279590	17280670	+	H	7	1081
Chr01_J4155S	Chr01	J4155S	XI	17280835	17283152	+	H	15	2318
Chr01_J4155S	Chr01	J4155S	XI	17283317	17286875	+	H	23	3559
Chr01_J4155S	Chr01	J4155S	XI	17287039	17290593	+	H	23	3555
Chr01_J4155S	Chr01	J4155S	XI	17291385	17293085	+	H	11	1701
Chr01_J4155S	Chr01	J4155S	XI	17313599	17315247	-	E	10	1649
Chr01_J4155S	Chr01	J4155S	XI	17316513	17317667	-	E	7	1155
Chr01_J4155S	Chr01	J4155S	XI	17336291	17337117	-	E	5	827
Chr01_J4155S	Chr01	J4155S	XI	17345030	17346015	-	E	6	986
Chr01_J4155S	Chr01	J4155S	XI	17355982	17357132	-	E	7	1151
Chr01_J4155S	Chr01	J4155S	XI	17368704	17371168	-	E	15	2465
Chr01_J4155S	Chr01	J4155S	XI	17373381	17375845	-	E	15	2465
Chr01_J4155S	Chr01	J4155S	XI	17377265	17378580	-	E	8	1316
Chr01_J4155S	Chr01	J4155S	XI	17388999	17389923	-	H	6	925
Chr01_J4155S	Chr01	J4155S	XI	17390888	17391813	-	H	6	926
Chr01_J4155S	Chr01	J4155S	XI	17407838	17408764	-	H	6	927
Chr01_J4155S	Chr01	J4155S	XI	17416315	17417470	-	E	7	1156
Chr01_J4155S	Chr01	J4155S	XI	17417623	17418449	-	E	5	827
Chr01_J4155S	Chr01	J4155S	XI	17424113	17424938	-	E	5	826
Chr01_J4155S	Chr01	J4155S	XI	17425578	17426345	-	H	5	768
Chr01_J4155S	Chr01	J4155S	XI	17431051	17432127	-	H	7	1077
Chr01_J4155S	Chr01	J4155S	XI	17432294	17433062	-	H	5	769
Chr01_J4155S	Chr01	J4155S	XI	17457369	17458355	-	E	6	987
Chr01_J4155S	Chr01	J4155S	XI	17458495	17459318	-	E	5	824
Chr01_J4155S	Chr01	J4155S	XI	17498182	17498949	-	H	5	768
Chr01_J4155S	Chr01	J4155S	XI	17500051	17500876	-	E	5	826
Chr01_J4155S	Chr01	J4155S	XI	17500877	17501644	-	H	5	768
Chr01_J4155S	Chr01	J4155S	XI	17501645	17502470	-	E	5	826
Chr01_J4155S	Chr01	J4155S	XI	17536575	17541957	-	E	5	5383
Chr01_J4155S	Chr01	J4155S	XI	17556240	17557046	-	E	5	807
Chr01_J4155S	Chr01	J4155S	XI	17576209	17577759	+	H	10	1551
Chr01_J4155S	Chr01	J4155S	XI	17577925	17579475	+	H	10	1551
Chr01_J4155S	Chr01	J4155S	XI	17579641	17581346	+	H	11	1706
Chr01_J4155S	Chr01	J4155S	XI	17582475	17584334	+	H	12	1860
Chr01_J4155S	Chr01	J4155S	XI	17591051	17591825	+	H	5	775
Chr01_J4155S	Chr01	J4155S	XI	17592787	17593864	+	H	7	1078
Chr01_J4155S	Chr01	J4155S	XI	17595446	17598064	+	H	17	2619
Chr01_J4155S	Chr01	J4155S	XI	17599026	17600103	+	H	7	1078
Chr01_J4155S	Chr01	J4155S	XI	17600744	17602595	+	H	12	1852
Chr01_J4155S	Chr01	J4155S	XI	17603557	17604634	+	H	7	1078
Chr01_J4155S	Chr01	J4155S	XI	17606062	17608835	+	H	18	2774
Chr01_J4155S	Chr01	J4155S	XI	17613719	17616794	+	H	20	3076
Chr01_J4155S	Chr01	J4155S	XI	17616959	17618806	+	H	12	1848
Chr01_J4155S	Chr01	J4155S	XI	17618971	17620818	+	H	12	1848
Chr01_J4155S	Chr01	J4155S	XI	17620983	17622365	+	H	9	1383
Chr01_J4155S	Chr01	J4155S	XI	17622530	17625144	+	H	17	2615
Chr01_J4155S	Chr01	J4155S	XI	17625309	17628699	+	H	22	3391
Chr01_J4155S	Chr01	J4155S	XI	17629185	17631348	+	H	14	2164
Chr01_J4155S	Chr01	J4155S	XI	17632587	17634287	+	H	11	1701
Chr01_J4155S	Chr01	J4155S	XI	17634773	17636778	+	H	13	2006
Chr01_J4155S	Chr01	J4155S	XI	17636944	17639869	+	H	19	2926
Chr01_J4155S	Chr01	J4155S	XI	17640676	17642679	+	H	13	2004
Chr01_J4155S	Chr01	J4155S	XI	17643011	17643784	+	H	5	774
Chr01_J4155S	Chr01	J4155S	XI	17643950	17644723	+	H	5	774
Chr01_J4155S	Chr01	J4155S	XI	17645209	17645982	+	H	5	774
Chr01_J4155S	Chr01	J4155S	XI	17648029	17648959	+	H	6	931
Chr01_J4155S	Chr01	J4155S	XI	17649445	17650368	+	H	6	924
Chr01_J4155S	Chr01	J4155S	XI	17650534	17651770	+	H	8	1237
Chr01_J4155S	Chr01	J4155S	XI	17770125	17770898	+	H	5	774
Chr01_J4155S	Chr01	J4155S	XI	17771539	17772312	+	H	5	774
Chr01_LK638S	Chr01	LK638S	XI	17099338	17100656	-	E	8	1319
Chr01_LK638S	Chr01	LK638S	XI	17101428	17102253	-	E	5	826
Chr01_LK638S	Chr01	LK638S	XI	17104985	17105809	-	E	5	825
Chr01_LK638S	Chr01	LK638S	XI	17124826	17125650	-	E	5	825
Chr01_LK638S	Chr01	LK638S	XI	17127652	17128641	-	E	6	990
Chr01_LK638S	Chr01	LK638S	XI	17128796	17129785	-	E	6	990
Chr01_LK638S	Chr01	LK638S	XI	17132020	17132844	-	E	5	825
Chr01_LK638S	Chr01	LK638S	XI	17141526	17143341	-	E	11	1816
Chr01_LK638S	Chr01	LK638S	XI	17145947	17147267	-	E	8	1321
Chr01_LK638S	Chr01	LK638S	XI	17155751	17156904	-	E	7	1154
Chr01_LK638S	Chr01	LK638S	XI	17162185	17163005	-	E	5	821
Chr01_LK638S	Chr01	LK638S	XI	17171991	17181376	+	H	32	9386
Chr01_LK638S	Chr01	LK638S	XI	17193357	17194269	+	H	6	913
Chr01_LK638S	Chr01	LK638S	XI	17195063	17195834	+	H	5	772
Chr01_LK638S	Chr01	LK638S	XI	17196000	17196927	+	H	6	928
Chr01_LK638S	Chr01	LK638S	XI	17198042	17199124	+	H	7	1083
Chr01_LK638S	Chr01	LK638S	XI	17201645	17202728	+	H	7	1084
Chr01_LK638S	Chr01	LK638S	XI	17202894	17203977	+	H	7	1084
Chr01_LK638S	Chr01	LK638S	XI	17204615	17205388	+	H	5	774
Chr01_LK638S	Chr01	LK638S	XI	17214976	17215746	+	H	5	771
Chr01_LK638S	Chr01	LK638S	XI	17316914	17317682	-	H	5	769
Chr01_LK638S	Chr01	LK638S	XI	17321215	17322536	-	E	8	1322
Chr01_LK638S	Chr01	LK638S	XI	17355552	17356319	-	H	5	768
Chr01_LK638S	Chr01	LK638S	XI	17359864	17360631	-	H	5	768
Chr01_LK638S	Chr01	LK638S	XI	17371754	17373240	-	E	9	1487
Chr01_LK638S	Chr01	LK638S	XI	17374032	17374853	-	E	5	822
Chr01_LK638S	Chr01	LK638S	XI	17375161	17375982	-	E	5	822
Chr01_LK638S	Chr01	LK638S	XI	17378083	17379237	-	E	7	1155
Chr01_LK638S	Chr01	LK638S	XI	17396899	17398265	+	H	9	1367
Chr01_LK638S	Chr01	LK638S	XI	17398907	17399837	+	H	6	931
Chr01_LK638S	Chr01	LK638S	XI	17400634	17401564	+	H	6	931
Chr01_LK638S	Chr01	LK638S	XI	17402361	17403136	+	H	5	776
Chr01_LK638S	Chr01	LK638S	XI	17403933	17404863	+	H	6	931
Chr01_LK638S	Chr01	LK638S	XI	17405029	17413363	+	H	25	8335
Chr01_LK638S	Chr01	LK638S	XI	17413529	17417402	+	H	25	3874
Chr01_LK638S	Chr01	LK638S	XI	17418354	17419283	+	H	6	930
Chr01_LK638S	Chr01	LK638S	XI	17419449	17420379	+	H	6	931
Chr01_LK638S	Chr01	LK638S	XI	17420546	17422095	+	H	10	1550
Chr01_LK638S	Chr01	LK638S	XI	17422261	17423190	+	H	6	930
Chr01_LK638S	Chr01	LK638S	XI	17423356	17424441	+	H	7	1086
Chr01_LK638S	Chr01	LK638S	XI	17424608	17429237	+	H	30	4630
Chr01_LK638S	Chr01	LK638S	XI	17429403	17430332	+	H	6	930
Chr01_LK638S	Chr01	LK638S	XI	17431123	17432052	+	H	6	930
Chr01_LK638S	Chr01	LK638S	XI	17432218	17432987	+	H	5	770
Chr01_LK638S	Chr01	LK638S	XI	17433152	17435006	+	H	12	1855
Chr01_LK638S	Chr01	LK638S	XI	17435645	17437034	+	H	9	1390
Chr01_LK638S	Chr01	LK638S	XI	17437673	17439326	+	H	11	1654
Chr01_LK638S	Chr01	LK638S	XI	17440284	17441054	+	H	5	771
Chr01_LK638S	Chr01	LK638S	XI	17441994	17442764	+	H	5	771
Chr01_LK638S	Chr01	LK638S	XI	17443555	17444479	+	H	6	925
Chr01_LK638S	Chr01	LK638S	XI	17444644	17445414	+	H	5	771
Chr01_LK638S	Chr01	LK638S	XI	17446205	17446974	+	H	5	770
Chr01_LK638S	Chr01	LK638S	XI	17447139	17448916	+	H	11	1778
Chr01_LK638S	Chr01	LK638S	XI	17453797	17467997	+	H	92	14201
Chr01_LK638S	Chr01	LK638S	XI	17468163	17469858	+	H	11	1696
Chr01_LK638S	Chr01	LK638S	XI	17470498	17471272	+	H	5	775
Chr01_LK638S	Chr01	LK638S	XI	17472067	17472841	+	H	5	775
Chr01_LK638S	Chr01	LK638S	XI	17473636	17474410	+	H	5	775
Chr01_LK638S	Chr01	LK638S	XI	17475989	17480605	+	H	30	4617
Chr01_LK638S	Chr01	LK638S	XI	17480770	17482311	+	H	10	1542
Chr01_LK638S	Chr01	LK638S	XI	17482594	17483305	+	H	5	712
Chr01_LK638S	Chr01	LK638S	XI	17483945	17484711	+	H	5	767
Chr01_LK638S	Chr01	LK638S	XI	17484876	17485805	+	H	6	930
Chr01_LK638S	Chr01	LK638S	XI	17486088	17486799	+	H	5	712
Chr01_LK638S	Chr01	LK638S	XI	17488078	17488852	+	H	5	775
Chr01_LK638S	Chr01	LK638S	XI	17490130	17490904	+	H	5	775
Chr01_LK638S	Chr01	LK638S	XI	17492647	17493574	+	H	6	928
Chr01_LK638S	Chr01	LK638S	XI	17496287	17497060	+	H	5	774
Chr01_LK638S	Chr01	LK638S	XI	17499773	17502387	+	H	17	2615
Chr01_LK638S	Chr01	LK638S	XI	17502553	17504865	+	H	15	2313
Chr01_LK638S	Chr01	LK638S	XI	17505031	17508070	+	H	13	3040
Chr01_LK638S	Chr01	LK638S	XI	17508236	17509005	+	H	5	770
Chr01_LK638S	Chr01	LK638S	XI	17509171	17510862	+	H	11	1692
Chr01_LK638S	Chr01	LK638S	XI	17511028	17513180	+	H	14	2153
Chr01_LK638S	Chr01	LK638S	XI	17513346	17516107	+	H	18	2762
Chr01_LK638S	Chr01	LK638S	XI	17516273	17518425	+	H	14	2153
Chr01_LK638S	Chr01	LK638S	XI	17518591	17525995	+	H	25	7405
Chr01_LK638S	Chr01	LK638S	XI	17526161	17530793	+	H	30	4633
Chr01_LK638S	Chr01	LK638S	XI	17530959	17533893	+	H	19	2935
Chr01_LK638S	Chr01	LK638S	XI	17534059	17534829	+	H	5	771
Chr01_LK638S	Chr01	LK638S	XI	17534995	17541166	+	H	40	6172
Chr01_LK638S	Chr01	LK638S	XI	17541332	17544110	+	H	18	2779
Chr01_LK638S	Chr01	LK638S	XI	17544276	17558625	+	H	93	14350
Chr01_LK638S	Chr01	LK638S	XI	17558791	17570720	+	H	46	11930
Chr01_LK638S	Chr01	LK638S	XI	17572001	17573388	+	H	9	1388
Chr01_LK638S	Chr01	LK638S	XI	17575048	17575874	-	E	5	827
Chr01_LK638S	Chr01	LK638S	XI	17585048	17586198	-	E	7	1151
Chr01_LK638S	Chr01	LK638S	XI	17589099	17589843	-	H	5	745
Chr01_LK638S	Chr01	LK638S	XI	17589867	17590635	+	H	5	769
Chr01_LK638S	Chr01	LK638S	XI	17591596	17592369	+	H	5	774
Chr01_LK638S	Chr01	LK638S	XI	17595065	17595838	+	H	5	774
Chr01_LK638S	Chr01	LK638S	XI	17600467	17601706	+	H	8	1240
Chr01_LK638S	Chr01	LK638S	XI	17601868	17602642	+	H	5	775
Chr01_LK638S	Chr01	LK638S	XI	17602804	17604198	+	H	9	1395
[truncated: 34,663 more rows]

## Sheet: S7
Supplementary Table 7 | Satellite annotation in diHRs
Chromosome	ChrID	Accession	Taxonomy	Start (bp)	End (bp)	Strand	Dimer	Copy number	diHR Length (bp)
Chr01_13-65	Chr01	13-65	GJ	16859991	16862054	+	CH	5	2064
Chr01_13-65	Chr01	13-65	GJ	16875414	16877787	+	CH	5	2374
Chr01_13-65	Chr01	13-65	GJ	16887179	16889552	+	CH	5	2374
Chr01_13-65	Chr01	13-65	GJ	16896891	16898983	+	CH	5	2093
Chr01_13-65	Chr01	13-65	GJ	16939425	16948177	+	CH	8	8753
Chr01_13-65	Chr01	13-65	GJ	16954772	17121621	+	CH	202	166850
Chr01_13-65	Chr01	13-65	GJ	17121863	17216390	+	CH	154	94528
Chr01_13-65	Chr01	13-65	GJ	17271213	17280329	-	CD	11	9117
Chr01_13-65	Chr01	13-65	GJ	17470784	17481848	-	CH	22	11065
Chr01_13-65	Chr01	13-65	GJ	17530591	17534081	+	CH	9	3491
Chr02_13-65	Chr02	13-65	GJ	13539971	13542661	+	FJ	5	2691
Chr02_13-65	Chr02	13-65	GJ	13626724	13670457	+	BO	36	43734
Chr02_13-65	Chr02	13-65	GJ	13670655	13681666	+	BO	7	11012
Chr02_13-65	Chr02	13-65	GJ	13766839	13827979	-	BO	26	61141
Chr02_13-65	Chr02	13-65	GJ	13884900	13887508	+	EO	5	2609
Chr03_13-65	Chr03	13-65	GJ	18693032	18706959	-	MN	21	13928
Chr03_13-65	Chr03	13-65	GJ	18707212	18719928	+	MN	20	12717
Chr03_13-65	Chr03	13-65	GJ	18720304	18722780	+	MN	5	2477
Chr03_13-65	Chr03	13-65	GJ	18723052	19085210	+	MN	154	362159
Chr03_13-65	Chr03	13-65	GJ	19088952	19140380	+	MN	7	51429
Chr03_13-65	Chr03	13-65	GJ	19154622	19196605	+	MN	8	41984
Chr04_13-65	Chr04	13-65	GJ	9967214	9985390	+	JK	8	18177
Chr04_13-65	Chr04	13-65	GJ	10049647	10051967	+	FJ	5	2321
Chr05_13-65	Chr05	13-65	GJ	12247478	12249960	+	LN	5	2483
Chr05_13-65	Chr05	13-65	GJ	12254304	12262522	+	LN	9	8219
Chr05_13-65	Chr05	13-65	GJ	12277098	12281286	+	LN	7	4189
Chr05_13-65	Chr05	13-65	GJ	12284387	12291837	+	LN	16	7451
Chr05_13-65	Chr05	13-65	GJ	12292148	12294940	+	LN	6	2793
Chr05_13-65	Chr05	13-65	GJ	12297267	12301455	+	LN	7	4189
Chr05_13-65	Chr05	13-65	GJ	12301766	12306576	+	LN	10	4811
Chr05_13-65	Chr05	13-65	GJ	12315263	12331876	+	LN	30	16614
Chr05_13-65	Chr05	13-65	GJ	12332367	12356991	+	BF	52	24625
Chr06_13-65	Chr06	13-65	GJ	15186203	15188989	-	MN	5	2787
Chr06_13-65	Chr06	13-65	GJ	15189020	15236263	+	MN	73	47244
Chr06_13-65	Chr06	13-65	GJ	15236678	16174224	+	MN	937	937547
Chr06_13-65	Chr06	13-65	GJ	16174225	16177944	+	JK	7	3720
Chr07_13-65	Chr07	13-65	GJ	12040445	12065038	+	BG	37	24594
Chr07_13-65	Chr07	13-65	GJ	12086942	12150252	+	BG	74	63311
Chr07_13-65	Chr07	13-65	GJ	12151726	12155796	+	BG	6	4071
Chr07_13-65	Chr07	13-65	GJ	12159517	12204572	+	BG	22	45056
Chr07_13-65	Chr07	13-65	GJ	12207861	12211855	+	BG	6	3995
Chr08_13-65	Chr08	13-65	GJ	12795268	12808482	+	MN	19	13215
Chr09_13-65	Chr09	13-65	GJ	2440722	2804909	+	BG	661	364188
Chr09_13-65	Chr09	13-65	GJ	2805198	2884770	+	BG	199	79573
Chr10_13-65	Chr10	13-65	GJ	8194560	8199302	+	JK	5	4743
Chr10_13-65	Chr10	13-65	GJ	8213392	8216991	+	JK	5	3600
Chr10_13-65	Chr10	13-65	GJ	8358883	8365673	-	CD	11	6791
Chr10_13-65	Chr10	13-65	GJ	8366075	8486478	-	CD	192	120404
Chr11_13-65	Chr11	13-65	GJ	12959403	13249812	-	AB	55	290410
Chr12_13-65	Chr12	13-65	GJ	11783405	11826625	+	JK	7	43221
Chr12_13-65	Chr12	13-65	GJ	12008909	12032591	-	FJ	5	23683
Chr01_18WR-118	Chr01	18WR-118	GJ	16839401	16865338	+	CH	55	25938
Chr01_18WR-118	Chr01	18WR-118	GJ	16919689	16923333	-	CD	8	3645
Chr01_18WR-118	Chr01	18WR-118	GJ	16977404	16980574	+	CH	8	3171
Chr02_18WR-118	Chr02	18WR-118	GJ	13682740	13692909	+	FJ	5	10170
Chr02_18WR-118	Chr02	18WR-118	GJ	13695739	13718051	+	AO	5	22313
Chr02_18WR-118	Chr02	18WR-118	GJ	13780112	13831858	+	BO	29	51747
Chr02_18WR-118	Chr02	18WR-118	GJ	13920090	13922975	+	EO	5	2886
Chr02_18WR-118	Chr02	18WR-118	GJ	13945301	13950107	+	EO	11	4807
Chr02_18WR-118	Chr02	18WR-118	GJ	13957394	13961698	+	EO	7	4305
Chr03_18WR-118	Chr03	18WR-118	GJ	19930328	19942489	-	MN	20	12162
Chr03_18WR-118	Chr03	18WR-118	GJ	19942490	20121015	+	MN	49	178526
Chr03_18WR-118	Chr03	18WR-118	GJ	20175419	20210526	+	MN	13	35108
Chr04_18WR-118	Chr04	18WR-118	GJ	9410907	9423864	+	JK	5	12958
Chr04_18WR-118	Chr04	18WR-118	GJ	9425076	9441190	+	JK	6	16115
Chr04_18WR-118	Chr04	18WR-118	GJ	9466927	9479600	+	JK	5	12674
Chr04_18WR-118	Chr04	18WR-118	GJ	9501012	9503177	+	FJ	5	2166
Chr05_18WR-118	Chr05	18WR-118	GJ	12494523	12496386	+	LN	5	1864
Chr05_18WR-118	Chr05	18WR-118	GJ	12497316	12500671	+	LN	5	3356
Chr05_18WR-118	Chr05	18WR-118	GJ	12514626	12521459	+	LN	15	6834
Chr05_18WR-118	Chr05	18WR-118	GJ	12524174	12538571	+	BF	32	14398
Chr06_18WR-118	Chr06	18WR-118	GJ	15383946	15388679	-	MN	10	4734
Chr06_18WR-118	Chr06	18WR-118	GJ	15388680	15512201	+	MN	99	123522
Chr06_18WR-118	Chr06	18WR-118	GJ	15533848	15577005	+	MN	49	43158
Chr06_18WR-118	Chr06	18WR-118	GJ	15577006	15580725	+	JK	7	3720
Chr07_18WR-118	Chr07	18WR-118	GJ	13161498	13178758	+	BG	13	17261
Chr08_18WR-118	Chr08	18WR-118	GJ	12914847	12923000	-	MN	8	8154
Chr09_18WR-118	Chr09	18WR-118	GJ	2794117	2837139	+	BG	92	43023
[truncated: 4,470 more rows]

## Sheet: S8
Supplementary Table 8 | Satellite annotation in muHRs
[truncated: 1,384 more rows]

[truncated: 3 more sheets: S9, S10, S11]
